# Supplementary material for: Hydrographic fronts shape productivity, nitrogen fixation, and microbial community composition in the South Indian Ocean and the Southern Ocean
Source: Copernicus journal article supplement (doi:10.5194/bg-2021-52), 2021-03-15
Supplement: Supplementary file 1 [file bg-2021-52-supplement.zip]

Archive with 24 entries (23 files):
- S1_code_archive.zip
- Supplementary/
- Supplementary/Figure S1.tif
- Supplementary/Figure S10.tif
- Supplementary/Figure S11.tif
- Supplementary/Figure S2.tif
- Supplementary/Figure S3.tif
- Supplementary/Figure S4.tif
- Supplementary/Figure S5.tif
- Supplementary/Figure S6.tif
- Supplementary/Figure S7.tif
- Supplementary/Figure S8.tif
- Supplementary/Figure S9.tif
- Supplementary/Supplementary_A_Diagnostic_Pigment_Concentration..docx
- Supplementary/Supplementary_B_Microbial analyses.docx
- Supplementary/Supplementary_C.pdf
- Supplementary/Supplementary_Figures.docx
- Supplementary/Table S1.docx
- Supplementary/Table S2.docx
- Supplementary/Table S3.docx
- Supplementary/Table S4.csv
- Supplementary/Table S5.csv
- Supplementary/Table S6.docx
- Supplementary/Table S7.docx
