# Supplementary material for: Hydrographic fronts shape productivity, nitrogen fixation, and microbial community composition in the South Indian Ocean and the Southern Ocean
Source: Copernicus journal article supplement (doi:10.5194/bg-2021-52), 2021-03-15
Supplement: Supplementary file 1 [file bg-2021-52-supplement.zip › Supplementary/Supplementary_B_Microbial analyses.docx]

## Supplementary B: Microbial analyses

### Amplicon 16S rRNA gene PCR

To determine the prokaryotic community composition, we amplified the v4 and v5 hypervariable regions of the 16S gene using universal primers proposed by Parada et al. (2016). PCR was performed at the EMBL institute following in-house protocols. DNA amplification was conducted in a triplicate 22 μl reaction mixture containing 8 ng DNA, 4 μL of 1 μM forward primer 515F-Y (5’-GTG YCA GCM GCC GCG GTA A-3’), 4 μl of 1 μM reverse primer 926R (5’-CCG YCA ATT YMT TTR AGT TT-3’) and 10 μl 2x KAPA HiFi HotStart ReadyMix (Roche). Cycling conditions included a 5 min heating step at 95°C followed by 25 cycles of 95°C for 45 s denaturation, 60°C for 45 s annealing and 72°C for 30 s for amplicon elongation. Triplicate reactions were pooled, and 5 μl were used to check for amplification on a 1% agarose gel using 5x Gel pilot loading dye (Qiagen).

The second amplification procedure was performed as described above, but the annealing temperature was at 65°C and the cycle number was reduced to 10 cycles. 1 μl of the product was used as the template for index PCR to a total volume of 12 μl reaction volume using 1 μl primer (biosystems' 384 12-base barcodes), 4 μl PCR water and 6 μl NEBNext Q5 Hot Start HiFi PCR Master Mix (New England Biolabs). The PCR product was checked on a 1% agarose gel. 3 μl from each reaction were pooled and purified using QIAquick PCR Purification Kit (QIAGEN, Valencia, CA, USA).

### 16S rRNA gene Index PCR

To add the Illumina-specific adapters and sample specific barcodes, we used 1 μl of previous PCR product to a total volume of 12 μL including 1 μL primer (12bp barcode and Illumina adapter 384; applied biosystems), 4 μl PCR grade water, and 6 μl Mastermix (NEBNext Q5 Hot Start HiFi PCR Master mix). The reaction was cycled at 95°C for 5 min, followed by 15 cycles of 95°C for 45 s, annealing at 60°C for 20 s, and extension at 72°C for 30 s. PCR product was checked on a 1% agarose gel. 3 μl of each sample were pooled and cleaned with QIAquick PCR Purification Kit (Qiagen). DNA concentration was quantified with Qubit™ dsDNA HS Assay Kit (ThermoFisher).

### Amplicon 18S rRNA PCR

Independent of the bacterial community composition we determined microbial eukaryotic community composition. We applied in-house (AWI Bremerhaven) protocol for 18S rRNA which has repeatedly shown to provide good results: we amplified the v4 hypervariable regions of the 18S gene using universal primers proposed by Stoeck et al. (2010). DNA amplification was conducted in a triplicate 25 μl reaction mixture containing 5 ng  DNA in 2.5 µl PCR grade water, 5 μl of 1 μM forward primer TA-Reuk454FWD1 (5’-CCAGCASCYGCGGTAATTCC-3’), 5 μl of 1μM reverse primer TAReukREV3 (5’-ACTTTCGTTCTTGATYRATGA-3’) and 12.5 μl 2x KAPA HiFi HotStart ReadyMix (Roche). Cycling conditions included a 3 min heating step at 95°C followed by 25 cycles of 95°C for 30 s, 55°C for 30 s and 72°C for 30 s. Triplicate reactions were pooled, and 5 μL were used to check for amplification on a 1% agarose gel using 5x Gel pilot loading dye (Qiagen). The PCR product was cleaned up with AMPure XP® beads and 5 µl of the product was used for the Index PCR.

### 18S rRNA Index PCR

To add the Illumina-specific adapters and sample-specific barcodes, we used 5 μl of previous PCR product to a total volume of 50 μl including 5 μl of each Index primers (Nextera Index Kit A), 10 μl PCR grade water and 25 μl 2x KAPA HiFi HotStart ReadyMix (Roche). The reaction was cycled at 95°C for 3 min, followed by 8 cycles of 95°C for 30 s, annealing at 55°C for 30 sec, and extension at 72°C for 30 s. PCR product was cleaned with AMPure XP beads. DNA concentration was quantified with a Bioanalyzer High sensitivity DNA chip (PerkinElmer).

# References

Parada, A. E., D. M. Needham, and J. A. Fuhrman. 2016. Every base matters: Assessing small subunit rRNA primers for marine microbiomes with mock communities, time series and global field samples. Environ. Microbiol. **18**: 1403–1414. doi:10.1111/1462-2920.13023

Stoeck, T., D. Bass, M. Nebel, R. Christen, and D. Meredith. 2010. Multiple marker parallel tag environmental DNA sequencing reveals a highly complex eukaryotic community in marine anoxic water. Mol. Ecol. **19**: 21–31. doi:10.1111/j.1365-294X.2009.04480.x
