# Supplementary material for: Hydrographic fronts shape productivity, nitrogen fixation, and microbial community composition in the South Indian Ocean and the Southern Ocean
Source: Copernicus journal article supplement (doi:10.5194/bg-2021-52), 2021-03-15
Supplement: Supplementary file 1 [file bg-2021-52-supplement.zip › Supplementary/Supplementary_Figures.docx]

## Supplementary Figures

**Figure S1: Nutrient concentration long-term data (μmol L-1) from surface waters (7 ± 3 m). (a) nitrate, (b) phosphate, (c) silicate from historic sampling of OISO stations since 1998. Colored bars indicate water masses according to their sea surface temperature; yellow bar highlight the Indian Ocean gyre (ISSG), light blue bar the Subtropical Front (STF), blue bar the Subantarctic Front (SAF), dark green bar the Polar Front (PF) and light green the Antarctic Zone (AZ). All calibrations were conducted using potassium dihydrogen phosphate for PO43-, sodium meta-silicate nonahydrate for Si(OH)4, potassium nitrate for NOx, sodium nitrite for NO2- and ammonium sulphate for NH4+. The detection limit of PO43- with this method was 0.01 µmol L-1, 0.3 µg L-1 for Si(OH)4, 0.03 µmol L-1 for NOx, and 0.01 µmol L-1 for NO2-, respectively. All calibrations were corrected for concentrations using certified reference materials (CRM) CRM1 CJ-2050 (target conc. 16.67 μmol L-1) and CRM2 CD-0342 (target conc. 5.65 μmol L-1). Calibration curves had an R2 value of 0.999. PO43-, Si, NOx and NO2 were measured following NO3- concentrations were calculated from the difference of NOx and NO2-.**

**Figure S2: Temperature- Salinity- density plot of all CTD depth profiles. Potential temperature was calculated in Ocean Data View based on measured Temperature and Salinity and reference density of 0.**

**Figure S3: Sea surface temperature (a) and Surface chlorophyll *a* concentration (b) from MODIS satellite data (**[**https://neo.sci.gsfc.nasa.gov/**](https://neo.sci.gsfc.nasa.gov/)**) of the study region in January 2017. Red stations indicate sampling for C- and N- rate measurements and samples for microbial community composition. Blue stations indicate stations with CTD sensor data. Colored lines are drawn according to separation of water masses in this study. The yellow line highlights the southern boundary of the Indian Ocean gyre (ISSG), light blue circle the Subtropical Front (STF), blue line the Subantarctic Front (SAF), green line the Polar Front Zone (PFZ) and the light green line indicates the boundary of the northern Antarctic Zone (AZ).**

**Figure S4: (a) relative abundance of different phytoplankton functional types (PFTs) calculated after Hirata et al. (2011), stations are sorted after increasing temperature. (b) relative abundance of phytoplankton size classes calculated after Uitz et al. 2006 against sea surface temperature. Colored bars indicate water masses according to their sea surface temperature; dark green color indicates the Antarctic Zone (AZ), light green the Polar Front Zone (PFZ), dark blue color Subantarctic Front (SAF), light blue indicates the Subtropical Front (STF) and yellow the Indian South Subtropical Gyre (ISSG).**

**Figure S5: microbial alpha diversity of prokaryotes (a-c) and eukaryotes (d-f). (a) Richness (q=0) and extrapolates richness estimate for prokaryotes. (b) Shannon entropy (q=1) and extrapolates Shannon estimate for prokaryotes. (c) Inverse Simpson Diversity (q=2) and extrapolates Inverse Simpson Diversity estimate for prokaryotes. (d) Richness (q=0) and extrapolates richness estimate for eukaryotes. (e) Shannon entropy (q=1) and extrapolates Shannon estimate for eukaryotes. (f) Inverse Simpson Diversity (q=2) and extrapolates Inverse Simpson Diversity estimate for eukaryotes.**

**Figure S6: Microbial alpha diversity (a) Eukaryotic ASV richness of 18S amplicon sequences changing over sea surface temperature (SST). (b) Prokaryotic ASV richness of 16S amplicon sequences changing over SST.  (c) alpha diversity of eukaryotic ASVs calculated as Inverse Simpson Index against SST. (d) alpha diversity of prokaryotic ASVs calculated as Inverse Simpson Index against SST. (e) Eukaryotic Inverse Simpson Index against primary productivity. (f) Prokaryotic Inverse Simpson Index against primary productivity. (g) Eukaryotic Inverse Simpson Index against nitrogen fixation. (h) Prokaryotic Inverse Simpson Index against nitrogen fixation; Pearson correlation (*r*) and p-values are indicated in the figures; dark green color indicates the Antarctic Zone (AZ), light green the Polar Front Zone (PFZ), dark blue color Subantarctic Front (SAF), light blue indicates the Subtropical Front (STF) and yellow the Indian South Subtropical Gyre (ISSG).**

**Figure S7: Residual Histograms of Pearson correlation plots from Fig. S6 of prokaryotes (a – d) and eukaryotes (e – h).**

**Figure S8: Residuals of RDA from CLR-transformed ASV tables of (a) prokaryotes rda(formula = ASV.clr.t ~ SST + oxygen + nitrate + ammonium + silicate + chl a + PP +N2fix, data = meta.z.16S); and (b) eukaryotes  rda(formula = ASV.clr.t ~ SST + oxygen + nitrate + ammonium + silicate + chla + PP + N2fix, data = meta.z.18S).**

**Figure S9: N2 fixation in nmol N L-1 d-1 against nitrate concentration (µM NO3-). Despite highest N2 fixation at low- NO3- sites, no clear association between N2 fixation and NO3- concentration was found.**

**Figure S10: General dissimilarity model (GDM) of (a) eukaryotes and (b) prokaryotes. GDM is used to assess non-linar relationship of microbial community dissimilarity with z-scored environmental parameters (i.e. geographical distance, salinity, mixed layer depth (MLD), temperature, oxygen, nitrate (NO3), ammonium (NH4), phosphate (PO4), silicate (Si), chlorophyll *a*, POC : PN ratio, primary productivity (PP), specific primary productivity (PB), and N2 fixation). Displayed is only those plots where environmental parameters contributed to detectable community change. Contribution of each environmental parameter is shown by the magnitude of each spline along the concentration of each environmental variable.**
