# Supplementary material for: Hydrographic fronts shape productivity, nitrogen fixation, and microbial community composition in the South Indian Ocean and the Southern Ocean
Source: Copernicus journal article supplement (doi:10.5194/bg-2021-52), 2021-03-15
Supplement: Supplementary file 1 [file bg-2021-52-supplement.zip › Supplementary/Table S1.docx]

**Table S1: OISO Expeditions and their duration used in nutrient analyses.**

| **Name** | **Year** | **Duration of sampling**  **(DD.MM.YYYY – DD.MM.YYYY)** |
| --- | --- | --- |
| OISO01 | 1998 | 21.01.1998 – 17.02.1998 |
| OISO04 | 2000 | 15.01.2000 – 07.02.2000 |
| OISO06 | 2001 | 04.01.2001 – 25.01.2001 |
| OISO08 | 2002 | 04.01.2002 – 01.02.2002 |
| OISO11 | 2004 | 03.01.2004 – 09.02.2004 |
| OISO12 | 2005 | 11.01.2005 – 22.02.2005 |
| OISO17 | 2009 | 03.01.2009 – 12.02.2009 |
| OISO18 | 2010 | 19.12.2009 – 24.01.2010 |
| OISO19 | 2011 | 14.01.2011 – 20.02.2011 |
| OISO21 | 2012 | 25.01.2012 – 07.03.2012 |
| OISO27 | 2017 | 05.01.2017 – 07.02.2017 |
