# Supplementary material for: Hydrographic fronts shape productivity, nitrogen fixation, and microbial community composition in the South Indian Ocean and the Southern Ocean
Source: Copernicus journal article supplement (doi:10.5194/bg-2021-52), 2021-03-15
Supplement: Supplementary file 1 [file bg-2021-52-supplement.zip › Supplementary/Table S2.docx]

**Table S2: OISO Formulas used for calculation of phytoplankton functional types and size class fractions based on diagnostic pigments after Hirata et al. (2011) and Uitz et al. (2006).**

| **Reference** | **Phytoplankton Size Class / Functional Type** | **Diagnostic Pigments** | **Estimation Formula** |
| --- | --- | --- | --- |
| **Hirata et al 2011** | Diatoms | Fuco | 1.41[Fuco] / ∑DPw |
| Dinoflagellates | Perid | 1.41[Perid] / ∑DPw |
| Green algae | TChl-*b* | 1.01[Chl-*b*]/ ∑DPw |
| Prokaryotes | Zea | 0.86[Zea] / ∑DPw |
| *Prochlorococcus* | Divinyl Chlorophyll-*a* (DV Chl-*a*) | 0.74[DV Chl-*a*] / ∑DPw |
| Prymnesiophytes (Haptophytes) | Hex-fuco, But-fuco | Approximated with Nanoplankton – Green algae |
| Pico-Eukaryotes | Hex-fuco, Chl-*b* | Approximated with Picoplankton – Prokaryotes |
| **Uitz et al 2006** | Microplankton | Fuco, Perid | 1.41[Fuco + Perid] / ∑DPW |
| Nanoplankton | Hex-fuco, But-fuco, Allo | (1.27[Hex-fuco] + 0.35[But-fuco] + 0.6[Allo]) / ∑DPW |
| Picoplankton | Zea, Hex-fuco, Chl-*b* | (0.86[Zea] + 1.01[TChl-*b*]) / ∑DPW |
