# Supplementary material for: Hydrographic fronts shape productivity, nitrogen fixation, and microbial community composition in the South Indian Ocean and the Southern Ocean
Source: Copernicus journal article supplement (doi:10.5194/bg-2021-52), 2021-03-15
Supplement: Supplementary file 1 [file bg-2021-52-supplement.zip › Supplementary/Table S3.docx]

**Table S3: DADA2 pipeline sequencing statistics for 16S and 18S rRNA gene sequences. Numbers show number of reads left in each sample after different steps in the pipeline. Input data is raw input data from Illumina sequencer. Input reads are filtered with filterandtrim() function with minimum quality score of 2 and minimum sequence length of 50bp; denoised (denoisedF are forward reads and denoisedR for reverse reads) with DADA2 default parameters (Key parameters: OMEGA_A = 1e-40, OMEGA_C = 1e-40, BAND_SIZE = 16), merged sequences with minimum overlap of 20bp and final step of denovo chimeras removal (method= consensus).**

|  | **Station** | **Input** | **filtered** | **denoisedF** | **denoisedR** | **merged** | **nonchim** |
| --- | --- | --- | --- | --- | --- | --- | --- |
| **16S rRNA gene** | OISO11_T0 | 66108 | 63846 | 62838 | 63254 | 48086 | 47037 |
| OISO3_T0 | 73642 | 69113 | 67515 | 68144 | 47726 | 46581 |
| OISOE_T0 | 50057 | 47584 | 46944 | 47108 | 35810 | 35511 |
| OISO7_T0 | 40330 | 38681 | 38120 | 38407 | 28130 | 27644 |
| OISO4_T0 | 36868 | 34934 | 34059 | 34409 | 27378 | 27115 |
| OISO37_T0 | 35416 | 33686 | 33222 | 33348 | 10635 | 10587 |
| OISO15_T0 | 47689 | 45126 | 43907 | 44502 | 34182 | 33642 |
| OISO2_T0 | 33694 | 32425 | 31429 | 31974 | 23589 | 23025 |
| OISO14_T0 | 45556 | 43802 | 43000 | 43351 | 34250 | 32550 |
| OISO9_T0 | 40535 | 38706 | 38023 | 38281 | 28173 | 27912 |
| OISO10_T0 | 46965 | 45299 | 44522 | 44889 | 30995 | 30468 |
| OISO18_T0 | 47929 | 45807 | 44381 | 44870 | 35860 | 35147 |
| **18S rRNA gene** | OISO11_T0 | 36696 | 25637 | 25445 | 25363 | 24923 | 24916 |
| OISO3_T0 | 180744 | 127416 | 125888 | 125477 | 117793 | 116330 |
| OISOE_T0 | 179771 | 128995 | 128454 | 128150 | 107141 | 107036 |
| OISO7_T0 | 103111 | 69257 | 68795 | 68678 | 60290 | 60093 |
| OISO6_T0 | 65038 | 44344 | 44031 | 43900 | 39237 | 39116 |
| OISO37_T0 | 60683 | 39490 | 39330 | 39281 | 38744 | 38532 |
| OISO15_T0 | 78683 | 56333 | 55512 | 55279 | 52216 | 50846 |
| OISO2_T0 | 116014 | 81494 | 79958 | 79546 | 72577 | 71621 |
| OISO4_T0 | 65095 | 47768 | 47333 | 47176 | 45761 | 45608 |
