# Supplementary material for: Hydrographic fronts shape productivity, nitrogen fixation, and microbial community composition in the South Indian Ocean and the Southern Ocean
Source: Copernicus journal article supplement (doi:10.5194/bg-2021-52), 2021-03-15
Supplement: Supplementary file 1 [file bg-2021-52-supplement.zip › Supplementary/Table S4.csv]

ASV	OISO2	OISO3	OISO18	OISO4	OISO14	OISO15	OISO7	OISO9	OISO37	OISO11	OISOE	kingdom	phylum	class	genus	family	species
>ASV_1	2	17	0	1	121	75	2565	2507	1219	5690	1499	Bacteria	Bacteroidetes	Bacteroidia	Flavobacteriales	Flavobacteriaceae	Ulvibacter
>ASV_2	1396	59	10231	0	20	1	0	0	0	14	7	Bacteria	Cyanobacteria	Oxyphotobacteria	Synechococcales	Cyanobiaceae	Prochlorococcus MIT9313
>ASV_3	2903	7888	0	142	30	0	0	0	3	3	17	Bacteria	Cyanobacteria	Oxyphotobacteria	Synechococcales	Cyanobiaceae	Prochlorococcus MIT9313
>ASV_4	73	196	1	674	415	843	498	1557	254	1879	2442	Bacteria	Proteobacteria	Alphaproteobacteria	Rhodobacterales	Rhodobacteraceae	Ascidiaceihabitans
>ASV_5	533	1397	306	528	318	571	576	889	303	2028	487	Bacteria	Proteobacteria	Alphaproteobacteria	SAR11 clade	Clade I	Clade Ia
>ASV_6	1	23	0	3234	2769	458	2	0	0	0	4	Bacteria	Cyanobacteria	Oxyphotobacteria	Synechococcales	Cyanobiaceae	Synechococcus CC9902
>ASV_7	0	4	0	145	1643	168	1242	486	450	1087	568	Bacteria	Bacteroidetes	Bacteroidia	Flavobacteriales	Flavobacteriaceae	NS2b marine group
>ASV_8	613	1281	676	362	275	476	210	375	89	502	173	Bacteria	Proteobacteria	Alphaproteobacteria	SAR11 clade	Clade II
>ASV_9	0	0	0	0	302	0	1973	807	183	1085	618	Bacteria	Bacteroidetes	Bacteroidia	Flavobacteriales	Flavobacteriaceae	Aquibacter
>ASV_10	839	2508	202	665	163	715	141	132	34	34	19	Bacteria	Proteobacteria	Alphaproteobacteria	Puniceispirillales	SAR116 clade
>ASV_11	0	0	0	30	250	257	838	907	170	1457	172	Bacteria	Proteobacteria	Alphaproteobacteria	Rhodobacterales	Rhodobacteraceae	Planktomarina
>ASV_12	0	3	0	0	0	0	197	201	124	831	1662	Bacteria	Proteobacteria	Gammaproteobacteria	Thiomicrospirales	Thioglobaceae	SUP05 cluster
>ASV_13	16	19	988	22	480	441	283	364	117	1010	603	Bacteria	Proteobacteria	Gammaproteobacteria	Alteromonadales	Alteromonadaceae	Alteromonas
>ASV_15	0	0	0	0	55	0	1185	771	219	686	598	Bacteria	Bacteroidetes	Bacteroidia	Flavobacteriales	Flavobacteriaceae	NS5 marine group
>ASV_16	0	5	0	0	16	0	256	321	261	1415	729	Bacteria	Proteobacteria	Gammaproteobacteria	Cellvibrionales	Porticoccaceae	SAR92 clade
>ASV_18	0	2	0	0	88	0	602	606	221	1113	395	Bacteria	Proteobacteria	Alphaproteobacteria	Rhodobacterales	Rhodobacteraceae	Planktomarina
>ASV_19	0	4	72	0	44	12	633	364	35	2068	255	Bacteria	Proteobacteria	Gammaproteobacteria	Alteromonadales	Pseudoalteromonadaceae	Pseudoalteromonas
>ASV_20	147	157	79	178	380	578	120	147	86	585	757	Bacteria	Proteobacteria	Gammaproteobacteria	SAR86 clade
>ASV_21	0	4	3	16	1136	886	717	625	10	5	0	Bacteria	Proteobacteria	Gammaproteobacteria	Beggiatoales	Beggiatoaceae	Beggiatoa
>ASV_23	0	0	0	0	848	58	378	113	200	691	627	Bacteria	Bacteroidetes	Bacteroidia	Flavobacteriales	Flavobacteriaceae	NS4 marine group
>ASV_24	401	33	2405	0	0	0	0	0	2	0	0	Bacteria	Cyanobacteria	Oxyphotobacteria	Synechococcales	Cyanobiaceae	Prochlorococcus MIT9313
>ASV_25	0	2	0	243	494	445	499	538	27	163	41	Bacteria	Bacteroidetes	Bacteroidia	Flavobacteriales	Flavobacteriaceae	NS4 marine group
>ASV_26	0	0	0	0	0	0	211	256	140	713	1035	Bacteria	Proteobacteria	Alphaproteobacteria	Rhodobacterales	Rhodobacteraceae	Planktomarina
>ASV_27	0	204	0	573	1022	770	94	14	2	9	4	Bacteria	Actinobacteria	Acidimicrobiia	Actinomarinales	Actinomarinaceae	Candidatus Actinomarina
>ASV_28	0	39	1	115	1321	331	243	129	29	166	33	Bacteria	Bacteroidetes	Bacteroidia	Flavobacteriales	Flavobacteriaceae	NS5 marine group
>ASV_29	0	0	2	0	2173	99	51	109	0	7	0	Bacteria	Cyanobacteria	Oxyphotobacteria	Synechococcales	Cyanobiaceae	Synechococcus CC9902
>ASV_30	423	767	631	284	34	265	0	0	12	3	7	Bacteria	Proteobacteria	Alphaproteobacteria	SAR11 clade	Clade I	Clade Ia
>ASV_31	1	4	0	0	3	0	416	353	85	450	308	Bacteria	Bacteroidetes	Bacteroidia	Flavobacteriales	NS9 marine group
>ASV_32	0	0	0	0	108	0	380	399	56	768	23	Bacteria	Bacteroidetes	Bacteroidia	Flavobacteriales	NS9 marine group
>ASV_33	28	222	1	168	508	207	123	269	15	70	556	Bacteria	Bacteroidetes	Bacteroidia	Flavobacteriales	Crocinitomicaceae	Fluviicola
>ASV_34	0	98	0	693	215	1222	0	0	6	0	3	Bacteria	Proteobacteria	Alphaproteobacteria	Rhodobacterales	Rhodobacteraceae	uncultured
>ASV_35	0	0	0	0	0	0	213	170	232	508	679	Bacteria	Bacteroidetes	Bacteroidia	Flavobacteriales	Flavobacteriaceae	NS4 marine group
>ASV_36	0	0	0	0	0	0	23	8	22	18	1956	Bacteria	Bacteroidetes	Bacteroidia	Flavobacteriales	Flavobacteriaceae	uncultured
>ASV_38	206	630	666	452	5	48	0	0	0	0	0	Bacteria	Actinobacteria	Acidimicrobiia	Actinomarinales	Actinomarinaceae	Candidatus Actinomarina
>ASV_39	0	6	0	0	0	0	16	18	133	1300	396	Bacteria	Proteobacteria	Alphaproteobacteria	Rhodobacterales	Rhodobacteraceae	Planktomarina
>ASV_40	603	1328	10	32	4	11	0	0	1	0	0	Bacteria	Cyanobacteria	Oxyphotobacteria	Synechococcales	Cyanobiaceae	Prochlorococcus MIT9313
>ASV_41	0	19	0	694	114	1120	0	0	2	0	3	Bacteria	Marinimicrobia (SAR406 clade)
>ASV_42	0	0	0	0	7	0	183	295	26	628	243	Bacteria	Proteobacteria	Alphaproteobacteria	Puniceispirillales	SAR116 clade
>ASV_43	31	403	10	522	184	633	32	24	10	21	13	Bacteria	Proteobacteria	Alphaproteobacteria	SAR11 clade	Clade I	Clade Ia
>ASV_44	27	147	34	277	191	369	160	104	0	135	33	Bacteria	Proteobacteria	Alphaproteobacteria	Parvibaculales	OCS116 clade
>ASV_45	0	9	0	4	66	38	119	246	118	547	224	Bacteria	Proteobacteria	Alphaproteobacteria	SAR11 clade	Clade II
>ASV_46	769	738	228	11	6	0	0	0	11	0	2	Bacteria	Actinobacteria	Acidimicrobiia	Actinomarinales	Actinomarinaceae	Candidatus Actinomarina
>ASV_47	1	0	0	0	47	3	224	522	103	252	212	Bacteria	Proteobacteria	Gammaproteobacteria	Cellvibrionales	Halieaceae	Luminiphilus
>ASV_48	1	47	0	218	630	726	48	28	4	0	0	Bacteria	Verrucomicrobia	Verrucomicrobiae	Verrucomicrobiales	Rubritaleaceae	Roseibacillus
>ASV_49	180	427	275	176	103	216	49	49	8	46	23	Bacteria	Proteobacteria	Alphaproteobacteria	SAR11 clade	Clade II
>ASV_51	52	320	108	326	289	501	1	0	11	2	0	Bacteria	Proteobacteria	Alphaproteobacteria	Rhodobacterales	Rhodobacteraceae	uncultured
>ASV_52	296	465	236	540	0	12	0	0	6	0	0	Bacteria	Proteobacteria	Alphaproteobacteria	Rhodobacterales	Rhodobacteraceae	uncultured
>ASV_53	0	0	0	51	92	173	358	385	39	174	21	Bacteria	Bacteroidetes	Bacteroidia	Flavobacteriales	Flavobacteriaceae	NS4 marine group
>ASV_55	229	906	40	98	19	114	0	0	0	0	0	Bacteria	Proteobacteria	Alphaproteobacteria	SAR11 clade	Clade IV
>ASV_56	8	25	0	248	510	497	26	13	6	35	7	Bacteria	Bacteroidetes	Bacteroidia	Flavobacteriales	NS9 marine group
>ASV_57	15	17	0	0	5	0	89	140	98	539	215	Bacteria	Proteobacteria	Alphaproteobacteria	Rhodobacterales	Rhodobacteraceae	Ascidiaceihabitans
>ASV_58	124	252	90	145	632	131	0	0	11	0	0	Bacteria	Bacteroidetes	Bacteroidia	Flavobacteriales	Flavobacteriaceae	Formosa
>ASV_59	0	15	0	46	553	339	19	19	45	176	22	Bacteria	Proteobacteria	Gammaproteobacteria	SAR86 clade
>ASV_60	0	2	0	0	13	0	334	422	40	109	60	Bacteria	Bacteroidetes	Bacteroidia	Flavobacteriales	Flavobacteriaceae	NS4 marine group
>ASV_61	0	20	0	342	86	284	116	177	7	129	11	Bacteria	Bacteroidetes	Bacteroidia	Flavobacteriales	Cryomorphaceae	uncultured
>ASV_62	0	2	59	0	33	15	35	199	0	640	212	Bacteria	Proteobacteria	Gammaproteobacteria	Oceanospirillales	Saccharospirillaceae	Oleibacter
>ASV_63	0	0	0	0	26	0	204	199	39	286	59	Bacteria	Proteobacteria	Gammaproteobacteria	SAR86 clade
>ASV_64	0	0	0	0	46	155	139	183	97	417	35	Bacteria	Bacteroidetes	Bacteroidia	Flavobacteriales	NS7 marine group
>ASV_65	0	0	0	0	0	0	40	121	46	380	380	Bacteria	Proteobacteria	Gammaproteobacteria	Oceanospirillales	Nitrincolaceae	uncultured
>ASV_66	370	568	232	52	3	4	0	0	5	0	0	Bacteria	Proteobacteria	Alphaproteobacteria	Rhodospirillales	AEGEAN-169 marine group
>ASV_67	359	475	246	53	9	33	0	0	0	0	0	Bacteria	Proteobacteria	Alphaproteobacteria	SAR11 clade	Clade I	Clade Ib
>ASV_68	0	5	0	0	1	0	3	10	342	547	227	Bacteria	Bacteroidetes	Bacteroidia	Flavobacteriales	Flavobacteriaceae	Polaribacter
>ASV_70	321	250	121	96	21	262	17	5	0	6	10	Archaea	Euryarchaeota	Thermoplasmata	Marine Group II
>ASV_71	0	105	0	47	68	139	47	127	34	244	69	Bacteria	Proteobacteria	Alphaproteobacteria	SAR11 clade	Clade II
>ASV_72	2	54	3	166	438	460	0	0	0	0	0	Bacteria	Bacteroidetes	Bacteroidia	Flavobacteriales	Flavobacteriaceae	NS5 marine group
>ASV_73	0	13	1	0	15	78	170	205	113	373	28	Bacteria	Bacteroidetes	Bacteroidia	Flavobacteriales	NS7 marine group
>ASV_74	374	80	141	154	64	298	1	3	0	0	0	Bacteria	Cyanobacteria	Oxyphotobacteria	Synechococcales	Cyanobiaceae	Synechococcus CC9902
>ASV_76	76	62	0	22	461	106	184	132	0	7	0	Bacteria	Proteobacteria	Alphaproteobacteria	Rhodobacterales	Rhodobacteraceae	Ascidiaceihabitans
>ASV_77	11	257	0	351	0	453	0	0	8	0	2	Bacteria	Cyanobacteria	Oxyphotobacteria	Synechococcales	Cyanobiaceae	Synechococcus CC9902
>ASV_78	15	60	0	67	220	96	179	193	7	96	19	Bacteria	Proteobacteria	Alphaproteobacteria	Rhodobacterales	Rhodobacteraceae	uncultured
>ASV_80	0	0	0	0	10	2	21	0	24	50	893	Bacteria	Bacteroidetes	Bacteroidia	Flavobacteriales	Flavobacteriaceae	Aurantivirga
>ASV_81	0	307	0	312	30	374	0	0	0	0	0	Bacteria	Proteobacteria	Gammaproteobacteria	Betaproteobacteriales	Methylophilaceae	OM43 clade
>ASV_82	241	121	176	443	1	35	0	0	7	0	0	Bacteria	Marinimicrobia (SAR406 clade)
>ASV_83	171	476	48	72	5	235	0	0	7	2	2	Bacteria	Proteobacteria	Alphaproteobacteria	Rhodobacterales	Rhodobacteraceae	uncultured
>ASV_84	0	0	312	0	184	43	71	171	3	10	133	Bacteria	Proteobacteria	Gammaproteobacteria	Oceanospirillales	Alcanivoracaceae	Alcanivorax
>ASV_86	102	240	98	281	0	271	0	0	0	0	0	Bacteria	Proteobacteria	Gammaproteobacteria	KI89A clade
>ASV_87	225	274	310	60	9	54	3	5	9	25	3	Bacteria	Proteobacteria	Alphaproteobacteria	SAR11 clade	Clade I	Clade Ib
>ASV_88	84	453	0	217	8	208	0	0	0	0	0	Bacteria	Bacteroidetes	Bacteroidia	Flavobacteriales	NS7 marine group
>ASV_89	0	35	0	18	492	339	54	22	0	0	0	Bacteria	Bacteroidetes	Bacteroidia	Flavobacteriales	Flavobacteriaceae	NS5 marine group
>ASV_91	0	0	0	0	0	0	126	255	17	36	298	Bacteria	Bacteroidetes	Bacteroidia	Flavobacteriales	Cryomorphaceae	NS10 marine group
>ASV_92	0	0	0	2	28	2	49	12	4	67	717	Bacteria	Proteobacteria	Alphaproteobacteria	Rhodobacterales	Rhodobacteraceae	Amylibacter
>ASV_93	0	0	0	0	487	0	201	103	8	21	9	Bacteria	Verrucomicrobia	Verrucomicrobiae	Verrucomicrobiales	Rubritaleaceae	Roseibacillus
>ASV_94	100	47	784	0	0	0	0	0	0	2	0	Bacteria	Proteobacteria	Alphaproteobacteria	Puniceispirillales	SAR116 clade
>ASV_95	274	629	8	16	0	7	0	0	0	0	0	Bacteria	Cyanobacteria	Oxyphotobacteria	Synechococcales	Cyanobiaceae	Prochlorococcus MIT9313
>ASV_96	0	0	0	10	216	305	74	119	5	37	8	Bacteria	Proteobacteria	Alphaproteobacteria	SAR11 clade	Clade IV
>ASV_97	0	3	2	71	114	203	245	147	12	25	38	Bacteria	Planctomycetes	Phycisphaerae	Phycisphaerales	Phycisphaeraceae	CL500-3
>ASV_98	0	0	0	0	32	3	59	80	50	200	241	Bacteria	Proteobacteria	Gammaproteobacteria	Betaproteobacteriales	Methylophilaceae	OM43 clade
>ASV_99	0	0	0	0	0	0	85	115	34	341	15	Bacteria	Proteobacteria	Gammaproteobacteria	SAR86 clade
>ASV_100	0	1	0	0	50	11	83	167	30	120	106	Bacteria	Proteobacteria	Gammaproteobacteria	Betaproteobacteriales	Methylophilaceae	OM43 clade
>ASV_101	16	263	1	12	0	510	0	0	0	0	0	Bacteria	Cyanobacteria	Oxyphotobacteria	Synechococcales	Cyanobiaceae	Prochlorococcus MIT9313
>ASV_102	0	7	0	733	36	8	0	0	0	0	7	Bacteria	Cyanobacteria	Oxyphotobacteria	Synechococcales	Cyanobiaceae	Synechococcus CC9902
>ASV_103	19	263	0	368	38	105	0	0	1	0	1	Bacteria	Actinobacteria	Acidimicrobiia	Actinomarinales	Actinomarinaceae	Candidatus Actinomarina
>ASV_104	0	46	0	129	312	303	0	0	0	0	0	Bacteria	Bacteroidetes	Bacteroidia	Flavobacteriales	Flavobacteriaceae	NS5 marine group
>ASV_105	125	141	517	0	0	0	0	0	0	0	0	Bacteria	Proteobacteria	Alphaproteobacteria	Rhodobacterales	Rhodobacteraceae	uncultured
>ASV_107	0	1	0	18	43	31	207	120	44	189	0	Bacteria	Bacteroidetes	Bacteroidia	Flavobacteriales	NS9 marine group
>ASV_108	0	145	0	230	124	269	0	0	0	0	0	Bacteria	Proteobacteria	Gammaproteobacteria	Cellvibrionales	Porticoccaceae	SAR92 clade
>ASV_109	0	3	0	82	12	141	76	194	5	119	8	Bacteria	Bacteroidetes	Bacteroidia	Flavobacteriales	NS9 marine group
>ASV_110	48	124	63	88	60	368	0	0	0	0	0	Bacteria	Proteobacteria	Gammaproteobacteria	SAR86 clade
>ASV_111	148	545	35	0	0	13	0	0	5	0	0	Bacteria	Proteobacteria	Gammaproteobacteria	SAR86 clade
>ASV_112	0	0	0	0	0	0	58	39	54	178	184	Bacteria	Bacteroidetes	Bacteroidia	Flavobacteriales	Flavobacteriaceae	NS5 marine group
>ASV_113	0	1	0	1	172	46	91	155	0	11	27	Bacteria	Proteobacteria	Gammaproteobacteria	Thiotrichales	Thiotrichaceae	uncultured
>ASV_114	0	11	0	0	56	48	113	142	17	135	14	Bacteria	Proteobacteria	Alphaproteobacteria	SAR11 clade	Clade I	Clade Ia
>ASV_115	0	0	0	0	3	0	42	7	0	0	630	Bacteria	Bacteroidetes	Bacteroidia	Flavobacteriales	Cryomorphaceae	Owenweeksia
>ASV_116	17	64	25	176	66	318	0	0	5	0	0	Bacteria	Bacteroidetes	Bacteroidia	Flavobacteriales	Flavobacteriaceae	NS2b marine group
>ASV_117	56	265	32	152	14	149	0	0	3	0	0	Bacteria	Proteobacteria	Gammaproteobacteria	SAR86 clade
>ASV_118	148	136	90	113	78	98	0	0	0	0	0	Bacteria	Verrucomicrobia	Verrucomicrobiae	Opitutales	Puniceicoccaceae	Lentimonas
>ASV_119	0	74	0	310	0	272	0	0	0	0	0	Bacteria	Cyanobacteria	Oxyphotobacteria	Synechococcales	Cyanobiaceae	Synechococcus CC9902
>ASV_120	5	47	5	2	4	16	27	22	14	153	281	Bacteria	Bacteroidetes	Bacteroidia	Cytophagales	Cyclobacteriaceae	Marinoscillum
>ASV_121	0	0	0	0	14	0	210	47	52	194	7	Bacteria	Bacteroidetes	Bacteroidia	Flavobacteriales	NS9 marine group
>ASV_122	132	253	227	0	0	0	0	0	9	0	0	Bacteria	Bacteroidetes	Bacteroidia	Flavobacteriales	Flavobacteriaceae	NS5 marine group
>ASV_123	0	0	0	0	0	0	0	0	0	0	613	Bacteria	Bacteroidetes	Bacteroidia	Chitinophagales	Saprospiraceae	Lewinella
>ASV_124	0	0	0	0	69	0	319	118	0	7	33	Bacteria	Bacteroidetes	Bacteroidia	Flavobacteriales	Flavobacteriaceae	NS5 marine group
>ASV_125	0	0	0	0	13	0	37	120	7	102	134	Bacteria	Proteobacteria	Gammaproteobacteria	Cellvibrionales	Porticoccaceae	SAR92 clade
>ASV_126	75	283	9	49	24	158	0	0	0	0	0	Bacteria	Proteobacteria	Gammaproteobacteria	SAR86 clade
>ASV_127	0	26	0	472	0	98	0	0	0	0	0	Bacteria	Bacteroidetes	Bacteroidia	Flavobacteriales	Flavobacteriaceae	NS4 marine group
>ASV_129	0	0	0	0	59	17	190	151	0	0	0	Bacteria	Proteobacteria	Gammaproteobacteria	Arenicellales	Arenicellaceae	uncultured
>ASV_131	0	3	29	4	9	6	9	34	3	412	45	Bacteria	Proteobacteria	Gammaproteobacteria	Oceanospirillales	Saccharospirillaceae	Oleibacter
>ASV_132	0	0	0	0	16	8	26	84	41	187	48	Bacteria	Proteobacteria	Alphaproteobacteria	SAR11 clade	Clade II
>ASV_134	13	192	3	147	21	176	0	0	1	0	0	Bacteria	Bacteroidetes	Bacteroidia	Flavobacteriales	Flavobacteriaceae	NS5 marine group
>ASV_135	1	2	0	18	154	94	87	68	20	64	20	Bacteria	Bacteroidetes	Bacteroidia	Flavobacteriales	Flavobacteriaceae	NS5 marine group
>ASV_136	0	0	0	0	27	10	44	83	34	153	43	Bacteria	Proteobacteria	Alphaproteobacteria	SAR11 clade	Clade I	Clade Ia
>ASV_137	0	189	0	174	26	156	0	0	1	0	0	Bacteria	Proteobacteria	Gammaproteobacteria	Thiotrichales	Thiotrichaceae	uncultured
>ASV_138	0	0	0	0	2	0	12	4	16	156	292	Bacteria	Bacteroidetes	Bacteroidia	Flavobacteriales	Cryomorphaceae	uncultured
>ASV_139	0	0	0	90	150	275	11	14	0	0	0	Bacteria	Proteobacteria	Gammaproteobacteria	SAR86 clade
>ASV_140	42	147	19	38	18	62	7	18	19	75	25	Bacteria	Proteobacteria	Alphaproteobacteria	SAR11 clade	Clade I	Clade Ia
>ASV_141	33	379	0	53	3	56	0	0	10	0	0	Bacteria	Proteobacteria	Alphaproteobacteria	SAR11 clade	Clade IV
>ASV_142	52	172	1	23	149	131	0	0	0	0	0	Bacteria	Bacteroidetes	Bacteroidia	Flavobacteriales	Flavobacteriaceae	NS4 marine group
>ASV_144	0	0	0	0	3	0	13	30	21	159	207	Bacteria	Proteobacteria	Gammaproteobacteria	Oceanospirillales	Nitrincolaceae	uncultured
>ASV_145	86	256	18	14	0	59	0	0	73	0	0	Bacteria	Cyanobacteria	Oxyphotobacteria	Synechococcales	Cyanobiaceae	Prochlorococcus MIT9313
>ASV_146	154	94	257	0	0	0	0	0	0	0	0	Bacteria	Bacteroidetes	Bacteroidia	Flavobacteriales	Flavobacteriaceae	NS5 marine group
>ASV_147	0	0	0	0	414	85	0	0	0	0	0	Bacteria	Proteobacteria	Alphaproteobacteria	Rhodobacterales	Rhodobacteraceae	Ascidiaceihabitans
>ASV_148	23	59	0	234	14	162	0	0	0	0	1	Bacteria	Proteobacteria	Alphaproteobacteria	Thalassobaculales	Nisaeaceae	OM75 clade
>ASV_149	71	132	27	17	10	58	10	20	4	67	34	Bacteria	Proteobacteria	Alphaproteobacteria	Sphingomonadales	Sphingomonadaceae	Novosphingobium
>ASV_150	0	0	0	0	460	26	0	0	0	0	0	Bacteria	Bacteroidetes	Bacteroidia	Flavobacteriales	Flavobacteriaceae	Formosa
>ASV_151	45	83	79	36	25	64	22	33	4	51	8	Bacteria	Proteobacteria	Alphaproteobacteria	SAR11 clade	Clade I	Clade Ib
>ASV_152	4	112	0	129	30	201	0	0	2	0	0	Bacteria	Proteobacteria	Alphaproteobacteria	SAR11 clade	Clade IV
>ASV_154	101	171	51	80	14	49	0	0	0	0	0	Bacteria	Proteobacteria	Alphaproteobacteria	SAR11 clade	Clade II
>ASV_156	39	0	419	0	0	0	0	0	0	0	0	Bacteria	Cyanobacteria	Oxyphotobacteria	Synechococcales	Cyanobiaceae	Prochlorococcus MIT9313
>ASV_157	111	46	294	0	0	0	0	0	0	0	0	Bacteria	Bacteroidetes	Bacteroidia	Cytophagales	Cyclobacteriaceae	Marinoscillum
>ASV_159	0	7	25	60	243	108	0	0	4	0	0	Bacteria	Bacteroidetes	Bacteroidia	Flavobacteriales	Flavobacteriaceae	Formosa
>ASV_160	0	0	0	0	0	0	0	0	0	0	440	Bacteria	Proteobacteria	Alphaproteobacteria	Rhodobacterales	Rhodobacteraceae	Loktanella
>ASV_162	0	0	0	0	0	0	0	0	0	0	437	Bacteria	Bacteroidetes	Bacteroidia	Flavobacteriales	Cryomorphaceae	uncultured
>ASV_164	0	19	0	104	35	278	0	0	0	0	0	Bacteria	Bacteroidetes	Bacteroidia	Flavobacteriales	NS7 marine group
>ASV_165	0	0	0	2	4	0	60	41	9	101	16	Bacteria	Proteobacteria	Alphaproteobacteria	Rhodobacterales	Rhodobacteraceae	uncultured
>ASV_166	29	41	308	8	0	44	0	0	0	0	0	Bacteria	Proteobacteria	Gammaproteobacteria	SAR86 clade
>ASV_167	99	309	8	13	0	0	0	0	0	0	0	Bacteria	Proteobacteria	Alphaproteobacteria	Parvibaculales	PS1 clade
>ASV_168	160	158	79	9	6	6	0	0	2	0	0	Bacteria	Proteobacteria	Gammaproteobacteria	SAR86 clade
>ASV_169	0	0	0	0	0	0	0	0	0	0	412	Bacteria	Bacteroidetes	Bacteroidia	Flavobacteriales	Flavobacteriaceae	Polaribacter
>ASV_170	0	0	0	0	13	0	74	93	0	42	7	Bacteria	Proteobacteria	Gammaproteobacteria	KI89A clade
>ASV_171	0	8	0	0	15	21	38	85	14	73	22	Bacteria	Proteobacteria	Alphaproteobacteria	SAR11 clade	Clade IV
>ASV_172	0	0	0	13	267	102	15	0	1	0	2	Bacteria	Bacteroidetes	Bacteroidia	Flavobacteriales	Flavobacteriaceae	uncultured
>ASV_173	178	219	0	0	0	0	0	0	0	0	0	Bacteria	Proteobacteria	Gammaproteobacteria	Cellvibrionales	Porticoccaceae	SAR92 clade
>ASV_174	3	58	3	71	51	127	27	22	2	12	0	Bacteria	Proteobacteria	Alphaproteobacteria	SAR11 clade	Clade I	Clade Ia
>ASV_175	261	113	16	0	1	0	0	0	0	0	0	Bacteria	Bacteroidetes	Bacteroidia	Flavobacteriales	Flavobacteriaceae	NS4 marine group
>ASV_176	11	86	0	59	51	92	40	34	3	0	0	Bacteria	Proteobacteria	Alphaproteobacteria	Puniceispirillales	SAR116 clade
>ASV_177	0	0	0	0	0	0	14	15	112	194	19	Bacteria	Bacteroidetes	Bacteroidia	Flavobacteriales	Flavobacteriaceae	NS4 marine group
>ASV_178	0	1	0	0	125	0	131	32	0	12	1	Bacteria	Proteobacteria	Gammaproteobacteria	Steroidobacterales	Woeseiaceae	Woeseia
>ASV_181	36	24	298	10	0	0	0	0	0	0	0	Bacteria	Proteobacteria	Alphaproteobacteria	Rickettsiales	S25-593
>ASV_182	0	1	1	0	7	0	186	78	11	30	7	Bacteria	Bacteroidetes	Bacteroidia	Flavobacteriales	NS9 marine group
>ASV_183	142	188	25	0	0	1	0	0	6	0	0	Bacteria	Proteobacteria	Alphaproteobacteria	Puniceispirillales	SAR116 clade
>ASV_184	2	0	0	19	200	84	26	5	3	7	11	Bacteria	Bacteroidetes	Bacteroidia	Flavobacteriales	Flavobacteriaceae	Aurantivirga
>ASV_185	0	0	0	37	69	90	62	58	0	0	0	Bacteria	Proteobacteria	Gammaproteobacteria	Thiomicrospirales	Thioglobaceae	SUP05 cluster
>ASV_186	0	0	70	5	38	38	22	30	0	72	62	Bacteria	Proteobacteria	Gammaproteobacteria	Alteromonadales	Alteromonadaceae	Alteromonas
>ASV_187	1	42	0	119	91	73	22	7	0	0	1	Bacteria	Proteobacteria	Alphaproteobacteria	uncultured
>ASV_188	69	0	283	3	0	0	0	0	0	0	0	Bacteria	Bacteroidetes	Bacteroidia	Flavobacteriales	Flavobacteriaceae	NS2b marine group
>ASV_189	75	39	203	35	0	0	0	0	0	0	0	Bacteria	Proteobacteria	Alphaproteobacteria	Puniceispirillales	SAR116 clade
>ASV_190	30	40	15	262	0	0	0	0	0	1	0	Bacteria	Verrucomicrobia	Verrucomicrobiae	Opitutales	Puniceicoccaceae	Coraliomargarita
>ASV_191	0	0	0	3	48	53	60	66	1	31	6	Bacteria	Proteobacteria	Alphaproteobacteria	Rhodobacterales	Rhodobacteraceae	Lentibacter
>ASV_192	2	161	0	17	33	131	0	0	0	0	0	Bacteria	Bacteroidetes	Bacteroidia	Flavobacteriales	Cryomorphaceae	uncultured
>ASV_193	120	131	47	24	0	22	0	0	0	0	0	Bacteria	Proteobacteria	Alphaproteobacteria	SAR11 clade	Clade I	Clade Ia
>ASV_195	2	14	0	162	12	149	0	0	0	0	0	Archaea	Euryarchaeota	Thermoplasmata	Marine Group II
>ASV_196	16	53	0	120	38	110	0	0	0	0	0	Bacteria	Bacteroidetes	Bacteroidia	Flavobacteriales	Flavobacteriaceae	NS5 marine group
>ASV_198	0	0	0	0	14	7	38	65	15	49	100	Bacteria	Bacteroidetes	Bacteroidia	Flavobacteriales	Flavobacteriaceae	Polaribacter
>ASV_199	67	62	79	99	0	28	0	0	0	0	0	Bacteria	Proteobacteria	Gammaproteobacteria	SAR86 clade
>ASV_201	0	30	0	114	61	124	0	0	0	0	0	Bacteria	Bacteroidetes	Bacteroidia	Flavobacteriales	Flavobacteriaceae	NS5 marine group
>ASV_202	0	9	0	71	43	206	0	0	0	0	0	Bacteria	Bacteroidetes	Bacteroidia	Flavobacteriales	Flavobacteriaceae	NS4 marine group
>ASV_203	0	9	0	5	0	157	51	9	0	11	3	Archaea	Euryarchaeota	Thermoplasmata	Marine Group II
>ASV_204	0	0	0	0	4	0	59	57	2	33	28	Bacteria	Proteobacteria	Gammaproteobacteria	Oceanospirillales	Pseudohongiellaceae	Pseudohongiella
>ASV_205	0	142	4	124	7	43	0	0	0	0	0	Bacteria	Proteobacteria	Alphaproteobacteria	Puniceispirillales	SAR116 clade
>ASV_209	54	203	0	50	0	0	0	0	0	0	0	Bacteria	Bacteroidetes	Bacteroidia	Flavobacteriales	Flavobacteriaceae	NS4 marine group
>ASV_210	178	35	78	9	4	0	0	0	0	0	0	Bacteria	Bacteroidetes	Bacteroidia	Flavobacteriales	NS7 marine group
>ASV_211	50	228	0	18	0	7	0	0	0	0	2	Bacteria	Proteobacteria	Alphaproteobacteria	uncultured
>ASV_212	0	3	0	0	5	0	84	145	6	10	17	Bacteria	Bacteroidetes	Bacteroidia	Flavobacteriales	Flavobacteriaceae	NS5 marine group
>ASV_213	0	1	0	1	19	9	71	90	5	19	4	Bacteria	Proteobacteria	Alphaproteobacteria	SAR11 clade	Clade I	Clade Ia
>ASV_214	0	0	0	0	0	0	6	11	4	8	261	Bacteria	Bacteroidetes	Bacteroidia	Flavobacteriales	Flavobacteriaceae	Ulvibacter
>ASV_215	0	94	0	50	0	153	0	0	0	0	0	Bacteria	Proteobacteria	Gammaproteobacteria	SAR86 clade
>ASV_216	0	0	0	0	0	0	0	0	0	0	297	Bacteria	Proteobacteria	Alphaproteobacteria	Kordiimonadales	uncultured
>ASV_218	0	227	0	65	0	0	0	0	0	0	0	Bacteria	Proteobacteria	Alphaproteobacteria	Puniceispirillales	SAR116 clade
>ASV_219	31	211	9	3	5	30	0	0	2	0	0	Bacteria	Verrucomicrobia	Verrucomicrobiae	Opitutales	Puniceicoccaceae	Lentimonas
>ASV_220	54	206	4	10	0	16	0	0	1	0	0	Bacteria	Proteobacteria	Alphaproteobacteria	Puniceispirillales	SAR116 clade
>ASV_221	0	0	0	0	0	0	1	12	5	8	259	Bacteria	Bacteroidetes	Bacteroidia	Flavobacteriales	Flavobacteriaceae	Ulvibacter
>ASV_222	0	14	0	141	41	93	0	0	1	0	0	Bacteria	Dadabacteria	Dadabacteriia	Dadabacteriales
>ASV_223	0	0	288	0	0	0	0	0	0	0	0	Archaea	Euryarchaeota	Thermoplasmata	Marine Group II
>ASV_224	0	0	0	0	0	0	6	60	13	14	167	Bacteria	Verrucomicrobia	Verrucomicrobiae	Verrucomicrobiales	Rubritaleaceae	Rubritalea
>ASV_225	22	67	163	21	0	14	0	0	0	0	0	Bacteria	Bacteroidetes	Bacteroidia	Flavobacteriales	NS9 marine group
>ASV_226	9	13	45	0	11	14	22	29	4	42	27	Bacteria	Proteobacteria	Alphaproteobacteria	SAR11 clade	Clade II
>ASV_227	111	74	88	10	0	0	0	0	0	0	0	Bacteria	Proteobacteria	Alphaproteobacteria	Rickettsiales	S25-593
>ASV_230	23	114	0	101	0	28	0	2	1	3	0	Bacteria	Proteobacteria	Alphaproteobacteria	Puniceispirillales	SAR116 clade
>ASV_231	0	11	0	160	8	93	0	0	0	1	0	Bacteria	Planctomycetes	Planctomycetacia	Pirellulales	Pirellulaceae	uncultured
>ASV_232	4	53	0	66	46	104	0	0	0	0	0	Bacteria	Proteobacteria	Alphaproteobacteria	Rhodospirillales	AEGEAN-169 marine group
>ASV_233	67	38	166	0	0	0	0	0	0	0	0	Bacteria	Proteobacteria	Gammaproteobacteria	SAR86 clade
>ASV_234	0	3	0	130	21	117	0	0	0	0	0	Bacteria	Verrucomicrobia	Verrucomicrobiae	Verrucomicrobiales	Rubritaleaceae	Roseibacillus
>ASV_236	0	0	269	0	0	0	0	0	0	0	0	Bacteria	Bacteroidetes	Bacteroidia	Flavobacteriales	Flavobacteriaceae	NS4 marine group
>ASV_238	32	164	0	63	0	9	0	0	0	0	0	Bacteria	Bacteroidetes	Bacteroidia	Flavobacteriales	Flavobacteriaceae	NS4 marine group
>ASV_240	46	9	201	10	0	0	0	0	0	0	0	Bacteria	Actinobacteria	Acidimicrobiia	Actinomarinales	Actinomarinaceae	Candidatus Actinomarina
>ASV_241	0	0	218	0	10	0	0	0	0	37	0	Bacteria	Proteobacteria	Deltaproteobacteria	Bradymonadales
>ASV_242	0	0	0	0	5	5	90	44	3	12	95	Bacteria	Bacteroidetes	Bacteroidia	Cytophagales	Cyclobacteriaceae	uncultured
>ASV_243	0	0	0	0	0	0	27	86	12	104	0	Bacteria	Bacteroidetes	Bacteroidia	Flavobacteriales	NS9 marine group
>ASV_244	0	0	1	0	12	0	44	38	10	46	60	Bacteria	Proteobacteria	Gammaproteobacteria	Betaproteobacteriales	Methylophilaceae	OM43 clade
>ASV_245	56	34	171	0	0	0	0	0	0	0	0	Bacteria	Proteobacteria	Alphaproteobacteria	uncultured
>ASV_247	102	59	98	0	0	0	0	0	0	0	0	Bacteria	Bacteroidetes	Bacteroidia	Flavobacteriales	Flavobacteriaceae	NS2b marine group
>ASV_249	0	0	253	0	0	0	0	0	0	0	0	Bacteria	Proteobacteria	Gammaproteobacteria	Alteromonadales	Alteromonadaceae	Alteromonas
>ASV_250	0	11	0	8	169	62	0	0	0	0	0	Bacteria	Bacteroidetes	Bacteroidia	Flavobacteriales	Flavobacteriaceae	NS5 marine group
>ASV_252	94	153	0	0	0	0	0	0	0	0	0	Bacteria	Proteobacteria	Alphaproteobacteria	Puniceispirillales	SAR116 clade
>ASV_253	61	36	149	0	0	0	0	0	0	0	0	Bacteria	Bacteroidetes	Bacteroidia	Flavobacteriales	NS9 marine group
>ASV_254	0	0	0	0	0	0	39	50	17	41	45	Bacteria	Bacteroidetes	Bacteroidia	Flavobacteriales	Flavobacteriaceae	NS4 marine group
>ASV_255	54	42	72	56	0	19	0	0	2	0	0	Bacteria	Proteobacteria	Gammaproteobacteria	Cellvibrionales	Halieaceae	OM60(NOR5) clade
>ASV_257	0	92	0	120	0	26	0	0	5	0	0	Bacteria	Bacteroidetes	Bacteroidia	Flavobacteriales	Flavobacteriaceae	NS5 marine group
>ASV_259	30	0	54	0	0	0	0	0	155	3	0	Bacteria	Bacteroidetes	Bacteroidia	Flavobacteriales	Flavobacteriaceae	Aurantivirga
>ASV_260	3	45	0	16	49	119	4	6	0	0	0	Bacteria	Proteobacteria	Alphaproteobacteria	Rhodospirillales	AEGEAN-169 marine group
>ASV_261	120	98	15	7	0	1	0	0	0	0	0	Bacteria	Proteobacteria	Alphaproteobacteria	Rhodobacterales	Rhodobacteraceae	Ascidiaceihabitans
>ASV_262	0	0	0	0	0	0	0	0	0	0	237	Bacteria	Bacteroidetes	Bacteroidia	Flavobacteriales	Flavobacteriaceae	NS5 marine group
>ASV_263	0	0	0	0	86	74	55	16	0	0	0	Bacteria	Bacteroidetes	Bacteroidia	Flavobacteriales	NS9 marine group
>ASV_264	16	68	49	81	0	21	0	0	0	0	0	Bacteria	Proteobacteria	Alphaproteobacteria	Puniceispirillales	SAR116 clade
>ASV_265	0	0	0	0	131	91	8	3	0	0	0	Bacteria	Proteobacteria	Gammaproteobacteria	SAR86 clade
>ASV_266	0	0	232	0	0	0	0	0	0	0	0	Bacteria	Cyanobacteria	Oxyphotobacteria	Synechococcales	Cyanobiaceae	Prochlorococcus MIT9313
>ASV_267	146	80	0	0	5	0	0	0	0	0	0	Bacteria	Cyanobacteria	Oxyphotobacteria	Nostocales	Microcystaceae	Atelocyanobacterium (UCYN-A)
>ASV_268	0	0	227	0	0	0	0	0	0	0	0	Bacteria	Bacteroidetes	Bacteroidia	Flavobacteriales	NS7 marine group
>ASV_269	58	108	8	49	0	0	0	0	0	0	0	Bacteria	Proteobacteria	Gammaproteobacteria	Thiotrichales	Thiotrichaceae	uncultured
>ASV_270	0	0	226	0	0	0	0	0	0	0	0	Bacteria	Marinimicrobia (SAR406 clade)
>ASV_275	57	91	44	5	0	16	0	0	8	0	0	Bacteria	Proteobacteria	Alphaproteobacteria	Rhodospirillales	AEGEAN-169 marine group
>ASV_276	28	176	0	0	0	10	0	0	4	0	1	Bacteria	Proteobacteria	Alphaproteobacteria	Puniceispirillales	SAR116 clade
>ASV_277	0	54	0	97	7	59	0	0	0	0	0	Bacteria	Proteobacteria	Alphaproteobacteria	SAR11 clade	Clade IV
>ASV_278	0	0	0	0	0	0	0	7	8	24	77	Bacteria	Proteobacteria	Gammaproteobacteria	Thiotrichales	Thiotrichaceae	uncultured
>ASV_279	6	46	0	10	34	114	0	0	1	1	0	Bacteria	Proteobacteria	Alphaproteobacteria	Rhodospirillales	AEGEAN-169 marine group
>ASV_280	0	0	0	0	0	0	4	9	21	78	62	Bacteria	Proteobacteria	Gammaproteobacteria	Betaproteobacteriales	Methylophilaceae	OM43 clade
>ASV_281	20	18	171	0	2	0	0	0	0	0	0	Bacteria	Bacteroidetes	Bacteroidia	Flavobacteriales	Flavobacteriaceae	NS4 marine group
>ASV_282	19	100	8	33	12	37	0	0	0	0	0	Bacteria	Proteobacteria	Alphaproteobacteria	SAR11 clade	Clade I	Clade Ia
>ASV_283	101	55	53	0	0	0	0	0	0	0	0	Bacteria	Proteobacteria	Alphaproteobacteria	Rhodospirillales	AEGEAN-169 marine group
>ASV_284	0	0	0	0	21	2	36	26	42	43	27	Bacteria	Bacteroidetes	Bacteroidia	Flavobacteriales	Flavobacteriaceae	Pseudofulvibacter
>ASV_285	0	0	0	0	0	0	54	87	4	34	0	Bacteria	Proteobacteria	Gammaproteobacteria	Cellvibrionales	Cellvibrionaceae	uncultured
>ASV_286	0	3	0	0	33	170	0	0	0	0	0	Bacteria	Bacteroidetes	Bacteroidia	Flavobacteriales	Flavobacteriaceae	NS4 marine group
>ASV_287	0	0	0	0	206	0	0	0	0	0	0	Bacteria	Bacteroidetes	Bacteroidia	Flavobacteriales	Crocinitomicaceae	Fluviicola
>ASV_288	27	55	0	111	2	6	0	0	0	0	0	Bacteria	Bacteroidetes	Bacteroidia	Flavobacteriales	Flavobacteriaceae	NS5 marine group
>ASV_289	0	0	0	0	0	0	6	9	12	33	77	Bacteria	Proteobacteria	Gammaproteobacteria	Thiotrichales	Thiotrichaceae	uncultured
>ASV_290	0	0	201	0	0	0	0	0	0	0	0	Bacteria	Bacteroidetes	Bacteroidia	Chitinophagales	uncultured
>ASV_291	0	0	0	0	0	0	0	0	200	0	0	Bacteria	Spirochaetes	Spirochaetia	Spirochaetales	Spirochaetaceae	Spirochaeta 2
>ASV_292	16	103	7	23	0	49	0	0	0	0	0	Bacteria	Marinimicrobia (SAR406 clade)
>ASV_293	118	79	0	0	1	0	0	0	0	0	0	Bacteria	Proteobacteria	Gammaproteobacteria	SAR86 clade
>ASV_294	0	33	0	0	0	165	0	0	0	0	0	Bacteria	Proteobacteria	Alphaproteobacteria	Puniceispirillales	SAR116 clade
>ASV_298	0	0	0	0	7	4	17	21	10	75	9	Bacteria	Proteobacteria	Alphaproteobacteria	SAR11 clade	Clade I	uncultured
>ASV_299	0	0	0	0	2	0	41	87	3	4	0	Bacteria	Bacteroidetes	Bacteroidia	Flavobacteriales	Flavobacteriaceae	NS5 marine group
>ASV_301	130	63	0	0	0	0	0	0	0	0	0	Bacteria	Bacteroidetes	Bacteroidia	Flavobacteriales	Flavobacteriaceae	NS2b marine group
>ASV_302	42	24	65	50	0	11	0	0	0	0	0	Archaea	Euryarchaeota	Thermoplasmata	Marine Group II
>ASV_303	0	0	0	0	0	0	0	0	0	0	192	Bacteria	Proteobacteria	Alphaproteobacteria	Rhodobacterales	Rhodobacteraceae	Sulfitobacter
>ASV_304	0	0	0	0	0	192	0	0	0	0	0	Bacteria	Bacteroidetes	Bacteroidia	Flavobacteriales	Flavobacteriaceae	NS2b marine group
>ASV_306	73	73	27	6	0	12	0	0	0	0	0	Bacteria	Proteobacteria	Alphaproteobacteria	SAR11 clade	Clade I	Clade Ib
>ASV_307	11	13	15	5	49	35	0	31	15	0	17	Bacteria	Bacteroidetes	Bacteroidia	Flavobacteriales	Flavobacteriaceae	Aquibacter
>ASV_308	10	41	0	125	0	14	0	0	0	0	0	Bacteria	Verrucomicrobia	Verrucomicrobiae	Opitutales	Puniceicoccaceae	MB11C04 marine group
>ASV_309	0	0	0	190	0	0	0	0	0	0	0	Bacteria	Proteobacteria	Gammaproteobacteria	Cellvibrionales	Porticoccaceae	SAR92 clade
>ASV_311	0	0	189	0	0	0	0	0	0	0	0	Bacteria	Proteobacteria	Alphaproteobacteria	Puniceispirillales	SAR116 clade
>ASV_312	16	37	0	36	0	99	0	0	0	0	0	Bacteria	Bacteroidetes	Bacteroidia	Flavobacteriales	NS7 marine group
>ASV_313	0	10	0	40	23	114	0	0	0	0	1	Bacteria	Proteobacteria	Gammaproteobacteria	Steroidobacterales	Woeseiaceae	Woeseia
>ASV_314	0	0	0	0	188	0	0	0	0	0	0	Bacteria	Bacteroidetes	Bacteroidia	Flavobacteriales	Flavobacteriaceae	NS5 marine group
>ASV_315	0	0	0	0	4	0	50	83	4	12	6	Bacteria	Bacteroidetes	Bacteroidia	Flavobacteriales	Flavobacteriaceae	NS5 marine group
>ASV_316	0	0	0	0	112	0	19	38	0	3	6	Bacteria	Proteobacteria	Gammaproteobacteria	Cellvibrionales	Halieaceae	OM60(NOR5) clade
>ASV_317	30	2	0	0	28	3	5	49	0	36	9	Bacteria	Bacteroidetes	Bacteroidia	Flavobacteriales	NS7 marine group
>ASV_318	0	0	0	2	30	91	4	37	4	6	2	Bacteria	Bacteroidetes	Bacteroidia	Chitinophagales	Saprospiraceae	Aureispira
>ASV_319	104	30	52	0	0	0	0	0	0	0	0	Bacteria	Proteobacteria	Alphaproteobacteria	Rhodobacterales	Rhodobacteraceae	uncultured
>ASV_320	48	49	79	3	5	0	0	0	0	0	0	Bacteria	Planctomycetes	Phycisphaerae	Phycisphaerales	Phycisphaeraceae	Urania-1B-19 marine sediment group
>ASV_321	16	90	0	45	20	12	0	0	0	0	0	Bacteria	Proteobacteria	Alphaproteobacteria	Rhodospirillales	AEGEAN-169 marine group
>ASV_322	0	0	76	0	26	12	4	4	6	8	35	Bacteria	Proteobacteria	Alphaproteobacteria	Rhodobacterales	Rhodobacteraceae	Rhodovulum
>ASV_323	0	48	0	10	10	110	0	0	0	0	0	Bacteria	Bacteroidetes	Bacteroidia	Flavobacteriales	Flavobacteriaceae	NS5 marine group
>ASV_324	0	0	0	0	0	0	130	43	0	0	0	Bacteria	Bacteroidetes	Bacteroidia	Flavobacteriales	Crocinitomicaceae	Fluviicola
>ASV_325	64	45	67	0	0	0	0	0	0	0	0	Bacteria	Bacteroidetes	Bacteroidia	Flavobacteriales	Flavobacteriaceae	NS5 marine group
>ASV_326	43	86	8	0	2	36	0	0	0	0	0	Bacteria	Verrucomicrobia	Verrucomicrobiae	Opitutales	Puniceicoccaceae	MB11C04 marine group
>ASV_328	53	45	73	3	0	0	0	0	0	0	0	Bacteria	Proteobacteria	Alphaproteobacteria	Rhodospirillales	AEGEAN-169 marine group
>ASV_329	12	25	0	82	5	50	0	0	0	0	0	Bacteria	Verrucomicrobia	Verrucomicrobiae	Opitutales	Puniceicoccaceae	MB11C04 marine group
>ASV_330	19	3	151	0	0	0	0	0	0	0	0	Bacteria	Proteobacteria	Gammaproteobacteria	Cellvibrionales	Porticoccaceae	SAR92 clade
>ASV_331	0	34	0	35	17	86	0	0	0	0	0	Bacteria	Proteobacteria	Alphaproteobacteria	Thalassobaculales	Nisaeaceae	OM75 clade
>ASV_332	0	0	0	47	17	102	6	0	0	0	0	Bacteria	Bacteroidetes	Bacteroidia	Flavobacteriales	NS9 marine group
>ASV_333	0	0	0	0	0	0	15	19	0	58	11	Bacteria	Proteobacteria	Deltaproteobacteria	SAR324 clade(Marine group B)
>ASV_334	0	0	0	0	0	0	33	7	5	43	73	Bacteria	Bacteroidetes	Bacteroidia	Flavobacteriales	NS9 marine group
>ASV_337	0	0	24	0	25	5	5	24	3	48	25	Bacteria	Proteobacteria	Alphaproteobacteria	Rhodobacterales	Rhodobacteraceae	Thalassococcus
>ASV_338	0	9	0	7	7	24	9	16	3	40	13	Bacteria	Proteobacteria	Alphaproteobacteria	SAR11 clade	Clade II
>ASV_339	33	15	116	0	0	0	0	0	0	0	0	Bacteria	Proteobacteria	Deltaproteobacteria	SAR324 clade(Marine group B)
>ASV_340	0	0	0	5	92	67	0	0	0	0	0	Bacteria	Proteobacteria	Alphaproteobacteria	Rhodobacterales	Rhodobacteraceae	uncultured
>ASV_341	0	0	164	0	0	0	0	0	0	0	0	Bacteria	Proteobacteria	Alphaproteobacteria	SAR11 clade	Clade IV
>ASV_343	48	109	4	0	0	0	0	0	0	0	0	Bacteria	Proteobacteria	Alphaproteobacteria	Parvibaculales	Parvibaculaceae	uncultured
>ASV_344	65	95	0	0	0	0	0	0	1	0	0	Bacteria	Bacteroidetes	Bacteroidia	Cytophagales	Cyclobacteriaceae	Marinoscillum
>ASV_345	0	54	0	79	6	22	0	0	0	0	0	Bacteria	Bacteroidetes	Bacteroidia	Flavobacteriales	Flavobacteriaceae	NS5 marine group
>ASV_346	63	21	50	6	6	15	0	0	0	0	0	Bacteria	Bacteroidetes	Bacteroidia	Flavobacteriales	Flavobacteriaceae	NS4 marine group
>ASV_348	0	0	0	0	0	158	0	0	0	0	0	Bacteria	Bacteroidetes	Bacteroidia	Flavobacteriales	Flavobacteriaceae	NS4 marine group
>ASV_349	4	5	0	80	2	66	0	0	0	0	0	Bacteria	Proteobacteria	Alphaproteobacteria	Rhodobacterales	Rhodobacteraceae	Ascidiaceihabitans
>ASV_350	25	66	44	14	0	7	0	0	0	0	0	Bacteria	Bacteroidetes	Bacteroidia	Flavobacteriales	Flavobacteriaceae	NS5 marine group
>ASV_351	0	0	156	0	0	0	0	0	0	0	0	Bacteria	Cyanobacteria	Oxyphotobacteria	Synechococcales	Cyanobiaceae	Prochlorococcus MIT9313
>ASV_352	10	24	0	67	1	27	11	3	3	0	0	Bacteria	Verrucomicrobia	Verrucomicrobiae	Opitutales	Puniceicoccaceae	MB11C04 marine group
>ASV_353	2	5	0	23	89	35	1	0	0	0	0	Bacteria	Planctomycetes	Planctomycetacia	Pirellulales	Pirellulaceae	Rubripirellula
>ASV_355	62	78	0	0	2	4	0	0	7	0	0	Bacteria	Proteobacteria	Alphaproteobacteria	Rickettsiales	S25-593
>ASV_357	0	0	0	15	0	80	21	2	0	0	4	Bacteria	Marinimicrobia (SAR406 clade)
>ASV_358	0	0	0	55	12	86	0	0	0	0	0	Bacteria	Verrucomicrobia	Verrucomicrobiae	Verrucomicrobiales	DEV007
>ASV_359	51	5	95	0	0	0	0	0	0	0	0	Bacteria	Cyanobacteria	Oxyphotobacteria	Synechococcales	Cyanobiaceae	Prochlorococcus MIT9313
>ASV_360	0	0	0	0	0	0	72	70	0	0	0	Bacteria	Bacteroidetes	Bacteroidia	Cytophagales	Cyclobacteriaceae	uncultured
>ASV_361	12	54	20	34	4	26	0	0	0	0	0	Bacteria	Proteobacteria	Alphaproteobacteria	SAR11 clade	Clade II
>ASV_365	78	70	0	0	0	0	0	0	0	0	0	Bacteria	Proteobacteria	Alphaproteobacteria	Rickettsiales	S25-593
>ASV_366	0	0	0	0	62	77	3	1	0	0	0	Archaea	Euryarchaeota	Thermoplasmata	Marine Group II
>ASV_367	9	77	0	45	0	15	1	0	0	0	0	Bacteria	Bacteroidetes	Bacteroidia	Flavobacteriales	Flavobacteriaceae	NS5 marine group
>ASV_368	17	23	107	0	0	0	0	0	0	0	0	Bacteria	Proteobacteria	Alphaproteobacteria	uncultured
>ASV_369	0	0	0	0	3	5	18	47	0	24	0	Bacteria	Proteobacteria	Alphaproteobacteria	Puniceispirillales	SAR116 clade
>ASV_370	0	0	0	0	1	0	25	0	0	1	119	Bacteria	Bacteroidetes	Bacteroidia	Chitinophagales	Saprospiraceae	uncultured
>ASV_371	0	4	0	9	0	133	0	0	0	0	0	Bacteria	Bacteroidetes	Bacteroidia	Flavobacteriales	Flavobacteriaceae	NS4 marine group
>ASV_372	12	101	0	27	0	3	0	0	0	0	0	Bacteria	Proteobacteria	Alphaproteobacteria	uncultured
>ASV_373	0	0	0	0	3	0	7	0	0	0	124	Bacteria	Bacteroidetes	Rhodothermia	Balneolales	Balneolaceae	Balneola
>ASV_374	0	0	0	0	19	52	21	31	0	0	0	Bacteria	Proteobacteria	Gammaproteobacteria	Oceanospirillales	Pseudohongiellaceae	Pseudohongiella
>ASV_375	0	0	0	0	0	0	0	0	145	0	0	Bacteria	Proteobacteria	Alphaproteobacteria	Rickettsiales	uncultured
>ASV_376	0	0	0	0	51	0	25	9	4	28	0	Bacteria	Proteobacteria	Gammaproteobacteria	SAR86 clade
>ASV_378	0	73	68	0	0	0	0	0	0	0	0	Bacteria	Bacteroidetes	Bacteroidia	Flavobacteriales	NS9 marine group
>ASV_379	0	0	0	0	0	0	5	8	0	6	103	Bacteria	Bacteroidetes	Bacteroidia	Flavobacteriales	Flavobacteriaceae	Flavicella
>ASV_380	54	84	0	0	3	0	0	0	0	0	0	Bacteria	Marinimicrobia (SAR406 clade)
>ASV_381	62	75	4	0	0	0	0	0	0	0	0	Bacteria	Cyanobacteria	Oxyphotobacteria	Synechococcales	Cyanobiaceae	Synechococcus CC9902
>ASV_382	26	20	91	3	0	0	0	0	0	0	0	Bacteria	Proteobacteria	Alphaproteobacteria	SAR11 clade	Clade I	Clade Ib
>ASV_383	0	0	0	6	30	3	0	70	26	0	5	Bacteria	Bacteroidetes	Bacteroidia	Flavobacteriales	Flavobacteriaceae	Psychroserpens
>ASV_384	0	0	0	20	30	90	0	0	0	0	0	Bacteria	Bacteroidetes	Bacteroidia	Flavobacteriales	Flavobacteriaceae	NS2b marine group
>ASV_385	0	2	0	0	4	0	7	14	9	56	15	Bacteria	Proteobacteria	Gammaproteobacteria	Betaproteobacteriales	Methylophilaceae	OM43 clade
>ASV_386	0	0	0	0	0	0	0	0	0	0	138	Bacteria	Bacteroidetes	Bacteroidia	Flavobacteriales	Cryomorphaceae	uncultured
>ASV_387	0	0	0	0	7	32	69	30	0	0	0	Bacteria	Bacteroidetes	Bacteroidia	Flavobacteriales	Cryomorphaceae	NS10 marine group
>ASV_389	137	0	0	0	0	0	0	0	0	0	0	Bacteria	Proteobacteria	Gammaproteobacteria	SAR86 clade
>ASV_390	0	0	0	0	0	135	0	0	0	0	0	Bacteria	Bacteroidetes	Bacteroidia	Flavobacteriales	Cryomorphaceae	uncultured
>ASV_391	0	0	0	4	0	23	13	13	0	6	0	Bacteria	Marinimicrobia (SAR406 clade)
>ASV_392	53	55	25	0	0	0	0	0	0	0	0	Bacteria	Bacteroidetes	Bacteroidia	Flavobacteriales	NS9 marine group
>ASV_393	43	7	9	0	0	0	0	0	3	70	0	Bacteria	Proteobacteria	Gammaproteobacteria	Vibrionales	Vibrionaceae	Catenococcus
>ASV_395	0	0	0	31	5	34	23	5	0	0	0	Archaea	Euryarchaeota	Thermoplasmata	Marine Group II
>ASV_396	60	71	0	0	0	0	0	0	0	0	0	Bacteria	Bacteroidetes	Bacteroidia	Flavobacteriales	NS9 marine group
>ASV_399	35	70	0	8	3	13	0	0	0	0	0	Bacteria	Proteobacteria	Alphaproteobacteria	SAR11 clade	Clade I	Clade Ib
>ASV_400	0	54	0	50	0	25	0	0	0	0	0	Bacteria	Bacteroidetes	Bacteroidia	Flavobacteriales	Flavobacteriaceae	NS5 marine group
>ASV_401	0	0	0	0	0	0	85	25	0	0	17	Bacteria	Bacteroidetes	Bacteroidia	Flavobacteriales	Cryomorphaceae	NS10 marine group
>ASV_404	0	0	0	0	0	0	0	0	0	0	125	Bacteria	Proteobacteria	Gammaproteobacteria	Cellvibrionales	Porticoccaceae	SAR92 clade
>ASV_405	3	99	0	0	0	20	0	0	2	0	0	Bacteria	Proteobacteria	Alphaproteobacteria	Rickettsiales	S25-593
>ASV_406	10	30	0	31	36	16	0	0	0	0	0	Bacteria	Bacteroidetes	Bacteroidia	Flavobacteriales	Crocinitomicaceae	Fluviicola
>ASV_407	0	7	0	26	4	86	0	0	0	0	0	Bacteria	Verrucomicrobia	Verrucomicrobiae	Opitutales	Puniceicoccaceae	uncultured
>ASV_408	0	0	0	0	0	0	0	0	0	0	123	Bacteria	Proteobacteria	Gammaproteobacteria	Arenicellales	Arenicellaceae	Arenicella
>ASV_410	3	85	0	20	4	10	0	0	0	0	0	Bacteria	Proteobacteria	Gammaproteobacteria	Betaproteobacteriales	Burkholderiaceae	MWH-UniP1 aquatic group
>ASV_411	16	36	0	21	0	49	0	0	0	0	0	Bacteria	Bacteroidetes	Bacteroidia	Flavobacteriales	Flavobacteriaceae	NS4 marine group
>ASV_412	21	5	95	0	0	0	0	0	0	0	0	Bacteria	Proteobacteria	Gammaproteobacteria	SAR86 clade
>ASV_413	0	44	0	11	19	46	0	0	1	0	0	Bacteria	Proteobacteria	Alphaproteobacteria	Parvibaculales	Parvibaculaceae	uncultured
>ASV_414	81	12	26	1	0	0	0	0	0	0	0	Bacteria	Proteobacteria	Gammaproteobacteria	Cellvibrionales	Halieaceae	OM60(NOR5) clade
>ASV_415	0	0	120	0	0	0	0	0	0	0	0	Bacteria	Cyanobacteria	Oxyphotobacteria	Synechococcales	Cyanobiaceae	Prochlorococcus MIT9313
>ASV_416	52	10	57	0	0	0	0	0	0	0	0	Bacteria	Proteobacteria	Alphaproteobacteria	Rickettsiales	S25-593
>ASV_417	0	0	0	0	0	0	0	0	0	0	119	Bacteria	Proteobacteria	Gammaproteobacteria	Cellvibrionales	Porticoccaceae	SAR92 clade
>ASV_419	27	73	0	0	3	12	0	0	3	0	0	Bacteria	Proteobacteria	Alphaproteobacteria	Rickettsiales	S25-593
>ASV_420	47	35	34	0	0	0	0	0	0	0	0	Bacteria	Proteobacteria	Alphaproteobacteria	Rhodospirillales	AEGEAN-169 marine group
>ASV_421	0	0	0	0	0	117	0	0	0	0	0	Bacteria	Proteobacteria	Gammaproteobacteria	SAR86 clade
>ASV_422	0	0	0	115	0	0	0	0	0	0	0	Bacteria	Proteobacteria	Gammaproteobacteria	Thiomicrospirales	Thioglobaceae	SUP05 cluster
>ASV_423	0	5	0	1	17	18	3	6	6	32	6	Bacteria	Proteobacteria	Alphaproteobacteria	SAR11 clade	Clade II
>ASV_424	0	0	14	0	8	2	9	28	4	27	15	Bacteria	Proteobacteria	Alphaproteobacteria	Rhodobacterales	Rhodobacteraceae	Leisingera
>ASV_425	0	0	0	0	2	0	26	32	0	6	14	Bacteria	Proteobacteria	Alphaproteobacteria	Rhodospirillales	Magnetospiraceae	Magnetospira
>ASV_426	0	0	0	0	0	112	0	0	0	0	0	Bacteria	Proteobacteria	Gammaproteobacteria	Betaproteobacteriales	Methylophilaceae	OM43 clade
>ASV_427	0	0	0	0	109	0	0	0	0	0	0	Bacteria	Cyanobacteria	Oxyphotobacteria	Phormidesmiales	Phormidesmiaceae	Phormidesmis ANT.LACV5.1
>ASV_428	0	0	17	0	8	0	15	41	3	7	12	Bacteria	Proteobacteria	Gammaproteobacteria	Nitrosococcales	Methylophagaceae	Methylophaga
>ASV_429	46	52	0	4	0	5	0	0	4	0	0	Bacteria	Proteobacteria	Alphaproteobacteria	SAR11 clade	Clade I	Clade Ia
>ASV_430	0	0	0	0	4	5	24	16	0	12	8	Bacteria	Proteobacteria	Alphaproteobacteria	SAR11 clade	uncultured
>ASV_431	0	0	0	0	88	22	0	0	0	0	0	Bacteria	Bacteroidetes	Bacteroidia	Flavobacteriales	NS9 marine group
>ASV_432	109	0	0	0	0	0	0	0	0	0	0	Archaea	Euryarchaeota	Thermoplasmata	Marine Group II
>ASV_434	2	80	0	17	0	7	0	0	0	0	0	Bacteria	Proteobacteria	Gammaproteobacteria	SAR86 clade
>ASV_435	1	0	0	84	7	7	7	0	0	0	0	Bacteria	Planctomycetes	Planctomycetacia	Pirellulales	Pirellulaceae	Blastopirellula
>ASV_436	27	78	0	0	0	0	0	0	0	0	0	Bacteria	Proteobacteria	Alphaproteobacteria	uncultured
>ASV_438	0	0	0	45	36	24	0	0	0	0	0	Bacteria	Proteobacteria	Gammaproteobacteria	Oceanospirillales	Pseudohongiellaceae	Pseudohongiella
>ASV_439	0	0	0	3	52	48	0	0	0	0	0	Bacteria	Proteobacteria	Gammaproteobacteria	Betaproteobacteriales	Methylophilaceae	OM43 clade
>ASV_440	0	102	0	0	0	0	0	0	0	0	0	Bacteria	Proteobacteria	Alphaproteobacteria	Puniceispirillales	SAR116 clade	Candidatus Puniceispirillum
>ASV_443	31	10	60	0	0	0	0	0	0	0	0	Bacteria	Proteobacteria	Gammaproteobacteria	SAR86 clade
>ASV_444	0	0	0	27	13	60	0	1	0	0	0	Bacteria	Bacteroidetes	Bacteroidia	Flavobacteriales	Cryomorphaceae	NS10 marine group
>ASV_445	0	0	0	0	0	0	13	14	0	16	0	Bacteria	Proteobacteria	Gammaproteobacteria	SAR86 clade
>ASV_446	20	20	0	13	0	0	14	2	0	8	23	Bacteria	Bacteroidetes	Rhodothermia	Balneolales	Balneolaceae	Balneola
>ASV_447	21	32	37	10	0	0	0	0	0	0	0	Bacteria	Proteobacteria	Deltaproteobacteria	SAR324 clade(Marine group B)
>ASV_448	0	0	100	0	0	0	0	0	0	0	0	Bacteria	Proteobacteria	Alphaproteobacteria	Puniceispirillales	SAR116 clade
>ASV_449	0	0	0	0	0	0	1	1	36	49	5	Bacteria	Bacteroidetes	Bacteroidia	Flavobacteriales	Flavobacteriaceae	NS5 marine group
>ASV_451	0	0	0	99	0	0	0	0	0	0	0	Bacteria	Verrucomicrobia	Verrucomicrobiae	Opitutales	Puniceicoccaceae	MB11C04 marine group
>ASV_453	0	0	0	98	0	0	0	0	0	0	0	Bacteria	Bacteroidetes	Bacteroidia	Flavobacteriales	Flavobacteriaceae	NS4 marine group
>ASV_454	0	0	98	0	0	0	0	0	0	0	0	Archaea	Euryarchaeota	Thermoplasmata	Marine Group II
>ASV_457	0	0	0	0	3	0	65	7	0	0	21	Bacteria	Bacteroidetes	Bacteroidia	Flavobacteriales	Flavobacteriaceae	Formosa
>ASV_458	0	32	0	51	0	12	0	0	0	0	0	Bacteria	Proteobacteria	Alphaproteobacteria	Rhodobacterales	Rhodobacteraceae	uncultured
>ASV_459	0	0	96	0	0	0	0	0	0	0	0	Bacteria	Proteobacteria	Alphaproteobacteria	Rickettsiales	S25-593
>ASV_460	0	0	0	0	0	0	2	0	2	15	53	Bacteria	Bacteroidetes	Bacteroidia	Flavobacteriales	NS9 marine group
>ASV_461	37	36	17	5	0	0	0	0	0	0	0	Bacteria	Proteobacteria	Alphaproteobacteria	SAR11 clade	Clade I	Clade Ia
>ASV_462	0	0	0	0	3	92	0	0	0	0	0	Bacteria	Marinimicrobia (SAR406 clade)
>ASV_465	0	0	0	94	0	0	0	0	0	0	0	Bacteria	Proteobacteria	Gammaproteobacteria	Cellvibrionales	Halieaceae	OM60(NOR5) clade
>ASV_466	0	0	94	0	0	0	0	0	0	0	0	Bacteria	Bacteroidetes	Bacteroidia	Flavobacteriales	Flavobacteriaceae	NS4 marine group
>ASV_467	0	0	0	0	0	0	6	15	0	5	50	Bacteria	Proteobacteria	Gammaproteobacteria	OM182 clade
>ASV_468	0	0	0	0	0	0	17	49	2	9	0	Bacteria	Bacteroidetes	Bacteroidia	Flavobacteriales	Cryomorphaceae	uncultured
>ASV_469	17	47	0	28	0	0	0	0	0	0	0	Bacteria	Bacteroidetes	Bacteroidia	Flavobacteriales	Flavobacteriaceae	NS4 marine group
>ASV_470	8	18	47	13	0	6	0	0	0	0	0	Bacteria	Proteobacteria	Alphaproteobacteria	Rhodobacterales	Rhodobacteraceae	uncultured
>ASV_471	33	43	10	5	0	0	0	0	0	0	0	Bacteria	Proteobacteria	Gammaproteobacteria	Thiotrichales	Thiotrichaceae	uncultured
>ASV_472	0	90	0	0	0	0	0	0	0	0	0	Bacteria	Proteobacteria	Alphaproteobacteria	Rickettsiales	S25-593
>ASV_474	0	0	0	0	11	1	29	15	0	9	4	Bacteria	Proteobacteria	Alphaproteobacteria	Thalassobaculales	Nisaeaceae	OM75 clade
>ASV_475	0	0	0	0	0	54	0	3	4	4	19	Bacteria	Bacteroidetes	Bacteroidia	Flavobacteriales	Flavobacteriaceae	NS5 marine group
>ASV_476	15	40	34	0	0	0	0	0	0	0	0	Bacteria	Verrucomicrobia	Verrucomicrobiae	Opitutales	Puniceicoccaceae	Coraliomargarita
>ASV_477	28	39	10	0	0	12	0	0	0	0	0	Bacteria	Proteobacteria	Alphaproteobacteria	Puniceispirillales	SAR116 clade
>ASV_478	70	19	0	0	0	0	0	0	0	0	0	Bacteria	Bacteroidetes	Bacteroidia	Flavobacteriales	Flavobacteriaceae	Tenacibaculum
>ASV_479	24	60	0	0	4	0	0	0	0	0	0	Bacteria	Bacteroidetes	Bacteroidia	Flavobacteriales	NS9 marine group
>ASV_480	17	4	67	0	0	0	0	0	0	0	0	Bacteria	Proteobacteria	Alphaproteobacteria	Puniceispirillales	SAR116 clade
>ASV_484	0	0	0	0	30	9	0	27	5	10	0	Bacteria	Proteobacteria	Alphaproteobacteria	Rhodospirillales	AEGEAN-169 marine group
>ASV_485	0	0	87	0	0	0	0	0	0	0	0	Bacteria	Planctomycetes	Planctomycetacia	Pirellulales	Pirellulaceae	Pirellula
>ASV_486	0	0	10	0	2	5	6	10	0	19	10	Bacteria	Proteobacteria	Deltaproteobacteria	Bdellovibrionales	Bacteriovoracaceae	Halobacteriovorax
>ASV_487	0	0	0	0	0	0	0	0	0	0	86	Bacteria	Bacteroidetes	Bacteroidia	Cytophagales	Cyclobacteriaceae	uncultured
>ASV_488	0	0	0	0	5	6	75	0	0	0	0	Bacteria	Bacteroidetes	Bacteroidia	Chitinophagales	uncultured
>ASV_489	0	0	86	0	0	0	0	0	0	0	0	Bacteria	Bacteroidetes	Bacteroidia	Flavobacteriales	NS9 marine group
>ASV_490	0	0	0	0	2	0	7	13	2	6	37	Bacteria	Bacteroidetes	Bacteroidia	Cytophagales	Cyclobacteriaceae	uncultured
>ASV_491	0	9	0	38	8	30	0	0	0	0	0	Bacteria	Proteobacteria	Alphaproteobacteria	Rhodobacterales	Rhodobacteraceae	uncultured
>ASV_492	17	29	38	0	0	0	0	0	0	0	0	Bacteria	Proteobacteria	Gammaproteobacteria	Oceanospirillales	Pseudohongiellaceae	Pseudohongiella
>ASV_493	0	1	6	0	0	2	4	7	0	0	50	Bacteria	Bacteroidetes	Ignavibacteria	OPB56
>ASV_494	0	0	84	0	0	0	0	0	0	0	0	Bacteria	Bacteroidetes	Bacteroidia	Flavobacteriales	Flavobacteriaceae	NS2b marine group
>ASV_495	0	0	0	0	32	29	15	0	2	2	3	Bacteria	Verrucomicrobia	Verrucomicrobiae	Verrucomicrobiales	Rubritaleaceae	Roseibacillus
>ASV_497	10	0	69	0	3	0	0	0	0	0	0	Bacteria	Proteobacteria	Alphaproteobacteria	Puniceispirillales	SAR116 clade
>ASV_499	0	0	0	0	0	0	6	0	5	41	0	Bacteria	Bacteroidetes	Bacteroidia	Flavobacteriales	Crocinitomicaceae	Fluviicola
>ASV_500	0	0	0	0	0	0	0	0	0	0	80	Bacteria	Bacteroidetes	Bacteroidia	Flavobacteriales	Cryomorphaceae	uncultured
>ASV_501	0	0	3	0	0	1	0	0	0	75	0	Bacteria	Lentisphaerae	Lentisphaeria	Lentisphaerales	Lentisphaeraceae	Lentisphaera
>ASV_502	10	64	0	5	0	0	0	0	0	0	0	Bacteria	Proteobacteria	Gammaproteobacteria	Betaproteobacteriales	Burkholderiaceae	MWH-UniP1 aquatic group
>ASV_504	0	18	0	46	0	15	0	0	0	0	0	Bacteria	Bacteroidetes	Bacteroidia	Flavobacteriales	NS9 marine group
>ASV_506	0	0	0	26	18	35	0	0	0	0	0	Bacteria	Planctomycetes	Phycisphaerae	Phycisphaerales	Phycisphaeraceae	CL500-3
>ASV_508	0	78	0	0	0	0	0	0	0	0	0	Bacteria	Cyanobacteria	Oxyphotobacteria	Synechococcales	Cyanobiaceae	Prochlorococcus MIT9313
>ASV_509	0	0	78	0	0	0	0	0	0	0	0	Bacteria	Proteobacteria	Alphaproteobacteria	SAR11 clade	Clade II
>ASV_510	0	0	78	0	0	0	0	0	0	0	0	Bacteria	Bacteroidetes	Bacteroidia	Flavobacteriales	Flavobacteriaceae	NS4 marine group
>ASV_511	0	0	0	0	0	0	0	0	0	34	43	Bacteria	Proteobacteria	Gammaproteobacteria	Betaproteobacteriales	Methylophilaceae	OM43 clade
>ASV_513	40	34	3	0	0	0	0	0	0	0	0	Bacteria	Proteobacteria	Gammaproteobacteria	SAR86 clade
>ASV_514	0	0	0	0	77	0	0	0	0	0	0	Bacteria	Cyanobacteria	Oxyphotobacteria	Synechococcales	Cyanobiaceae	Synechococcus CC9902
>ASV_515	0	0	77	0	0	0	0	0	0	0	0	Bacteria	Proteobacteria	Alphaproteobacteria	Puniceispirillales	SAR116 clade
>ASV_516	0	0	0	0	0	0	11	8	1	15	22	Bacteria	Proteobacteria	Alphaproteobacteria	uncultured
>ASV_518	0	0	0	52	0	22	0	0	2	0	0	Bacteria	Bacteroidetes	Bacteroidia	Flavobacteriales	NS9 marine group
>ASV_519	0	0	0	0	0	0	0	0	0	0	0	Bacteria	Proteobacteria	Alphaproteobacteria	SAR11 clade	Clade I	Clade Ia
>ASV_520	0	0	0	0	0	0	0	0	0	75	0	Bacteria	Proteobacteria	Gammaproteobacteria	Oceanospirillales	Saccharospirillaceae	Thalassolituus
>ASV_522	0	5	0	0	10	10	2	12	3	19	5	Bacteria	Proteobacteria	Alphaproteobacteria	SAR11 clade	Clade II
>ASV_523	0	75	0	0	0	0	0	0	0	0	0	Bacteria	Proteobacteria	Alphaproteobacteria	Rickettsiales	S25-593
>ASV_525	0	10	0	19	13	33	0	0	0	0	0	Bacteria	Proteobacteria	Alphaproteobacteria	uncultured
>ASV_526	0	0	75	0	0	0	0	0	0	0	0	Bacteria	Proteobacteria	Alphaproteobacteria	Puniceispirillales	SAR116 clade
>ASV_527	0	0	75	0	0	0	0	0	0	0	0	Bacteria	Proteobacteria	Gammaproteobacteria	Alteromonadales	Alteromonadaceae	Alteromonas
>ASV_528	0	6	0	14	13	41	0	0	0	0	0	Bacteria	Verrucomicrobia	Verrucomicrobiae	Opitutales	Puniceicoccaceae	Coraliomargarita
>ASV_530	0	0	0	0	0	15	7	19	4	12	1	Bacteria	Bacteroidetes	Bacteroidia	Flavobacteriales	Flavobacteriaceae	NS5 marine group
>ASV_532	0	0	0	0	0	0	3	2	3	0	57	Bacteria	Bacteroidetes	Bacteroidia	Flavobacteriales	Flavobacteriaceae	Polaribacter 4
>ASV_533	12	45	0	0	4	10	0	0	0	0	0	Bacteria	Bacteroidetes	Bacteroidia	Flavobacteriales	NS7 marine group
>ASV_534	15	11	45	0	0	0	0	0	0	0	0	Bacteria	Verrucomicrobia	Verrucomicrobiae	Opitutales	Puniceicoccaceae	Coraliomargarita
>ASV_535	0	0	0	41	19	11	0	0	0	0	0	Bacteria	Verrucomicrobia	Verrucomicrobiae	Arctic97B-4 marine group
>ASV_536	0	0	0	0	0	0	0	0	0	70	0	Bacteria	Proteobacteria	Gammaproteobacteria	Oceanospirillales	Saccharospirillaceae	Oceanobacter
>ASV_537	0	0	0	0	5	5	9	8	0	16	2	Bacteria	Proteobacteria	Alphaproteobacteria	SAR11 clade	Clade I	Clade Ia
>ASV_538	0	0	0	0	27	5	18	8	0	1	3	Bacteria	Proteobacteria	Alphaproteobacteria	uncultured
>ASV_539	15	17	5	0	10	7	0	6	0	0	0	Bacteria	Bacteroidetes	Bacteroidia	Flavobacteriales	Flavobacteriaceae	Winogradskyella
>ASV_540	20	7	43	0	0	0	0	0	0	0	0	Bacteria	Proteobacteria	Alphaproteobacteria	Puniceispirillales	SAR116 clade	Candidatus Puniceispirillum
>ASV_541	0	0	70	0	0	0	0	0	0	0	0	Bacteria	Proteobacteria	Alphaproteobacteria	Rickettsiales	S25-593
>ASV_544	2	8	0	2	33	23	0	0	1	0	0	Bacteria	Proteobacteria	Alphaproteobacteria	SAR11 clade	Clade I	uncultured
>ASV_545	0	0	0	0	3	0	15	18	0	0	15	Bacteria	Proteobacteria	Deltaproteobacteria	Bdellovibrionales	Bdellovibrionaceae	OM27 clade
>ASV_547	0	0	69	0	0	0	0	0	0	0	0	Bacteria	Proteobacteria	Alphaproteobacteria	Puniceispirillales	SAR116 clade
>ASV_548	0	0	0	0	3	7	7	16	3	5	2	Bacteria	Proteobacteria	Alphaproteobacteria	SAR11 clade	Clade I	Clade Ia
>ASV_549	0	68	0	0	0	0	0	0	0	0	0	Bacteria	Proteobacteria	Alphaproteobacteria	Rhodospirillales	Terasakiellaceae	uncultured
>ASV_550	0	0	0	0	0	68	0	0	0	0	0	Bacteria	Cyanobacteria	Oxyphotobacteria	Synechococcales	Cyanobiaceae	Prochlorococcus MIT9313
>ASV_552	0	0	0	0	24	0	0	3	0	19	18	Bacteria	Bacteroidetes	Bacteroidia	Flavobacteriales	Cryomorphaceae	uncultured
>ASV_554	0	0	0	0	67	0	0	0	0	0	0	Bacteria	Bacteroidetes	Bacteroidia	Flavobacteriales	Crocinitomicaceae	Fluviicola
>ASV_555	0	0	67	0	0	0	0	0	0	0	0	Bacteria	Proteobacteria	Gammaproteobacteria	Cellvibrionales	Halieaceae	OM60(NOR5) clade
>ASV_557	40	23	1	2	0	0	0	0	0	0	0	Bacteria	Proteobacteria	Alphaproteobacteria	Rhodobacterales	Rhodobacteraceae	uncultured
>ASV_558	6	13	0	4	13	3	7	7	0	8	0	Bacteria	Proteobacteria	Alphaproteobacteria	Rhodobacterales	Rhodobacteraceae	Tropicimonas
>ASV_559	21	17	27	0	0	0	0	0	0	0	0	Bacteria	Proteobacteria	Alphaproteobacteria	Rhodospirillales	Magnetospiraceae	uncultured
>ASV_560	6	16	9	7	5	22	0	0	0	0	0	Bacteria	Proteobacteria	Alphaproteobacteria	SAR11 clade	Clade I	Clade Ia
>ASV_561	0	0	0	0	0	0	0	0	0	0	65	Bacteria	Bacteroidetes	Bacteroidia	Flavobacteriales	Cryomorphaceae	uncultured
>ASV_562	0	0	0	44	0	21	0	0	0	0	0	Bacteria	Verrucomicrobia	Verrucomicrobiae	Opitutales	Puniceicoccaceae	MB11C04 marine group
>ASV_563	65	0	0	0	0	0	0	0	0	0	0	Bacteria	Proteobacteria	Alphaproteobacteria	Puniceispirillales	SAR116 clade
>ASV_567	0	0	0	64	0	0	0	0	0	0	0	Bacteria	Proteobacteria	Alphaproteobacteria	Puniceispirillales	SAR116 clade
>ASV_569	0	0	64	0	0	0	0	0	0	0	0	Bacteria	Proteobacteria	Gammaproteobacteria	SAR86 clade
>ASV_571	30	33	0	0	0	0	0	0	0	0	0	Bacteria	Bacteroidetes	Bacteroidia	Flavobacteriales	Flavobacteriaceae	NS5 marine group
>ASV_572	0	0	0	0	0	0	41	13	2	0	3	Bacteria	Planctomycetes	Planctomycetacia	Pirellulales	Pirellulaceae	uncultured
>ASV_573	0	0	63	0	0	0	0	0	0	0	0	Archaea	Euryarchaeota	Thermoplasmata	Marine Group II
>ASV_576	0	0	0	62	0	0	0	0	0	0	0	Bacteria	Verrucomicrobia	Verrucomicrobiae	Opitutales	Puniceicoccaceae	MB11C04 marine group
>ASV_577	0	0	0	62	0	0	0	0	0	0	0	Bacteria	Bacteroidetes	Bacteroidia	Flavobacteriales	Flavobacteriaceae	Tenacibaculum
>ASV_578	0	0	4	11	18	29	0	0	0	0	0	Bacteria	Planctomycetes	Phycisphaerae	Phycisphaerales	Phycisphaeraceae	CL500-3
>ASV_579	0	0	62	0	0	0	0	0	0	0	0	Bacteria	Bacteroidetes	Bacteroidia	Flavobacteriales	Flavobacteriaceae	NS4 marine group
>ASV_580	0	0	0	0	1	1	6	6	1	29	14	Bacteria	Proteobacteria	Alphaproteobacteria	Rickettsiales	Anaplasmataceae	uncultured
>ASV_581	0	61	0	0	0	0	0	0	0	0	0	Bacteria	Proteobacteria	Alphaproteobacteria	Puniceispirillales	SAR116 clade
>ASV_583	13	14	34	0	0	0	0	0	0	0	0	Bacteria	Proteobacteria	Gammaproteobacteria	SAR86 clade
>ASV_584	0	0	61	0	0	0	0	0	0	0	0	Bacteria	Proteobacteria	Alphaproteobacteria	Parvibaculales	PS1 clade
>ASV_585	0	0	0	0	0	3	4	8	0	26	6	Bacteria	Proteobacteria	Deltaproteobacteria	Bdellovibrionales	Bacteriovoracaceae	Peredibacter
>ASV_587	0	0	0	0	1	0	14	2	0	15	6	Bacteria	Bacteroidetes	Bacteroidia	Flavobacteriales	Flavobacteriaceae	Psychroserpens
>ASV_588	0	60	0	0	0	0	0	0	0	0	0	Bacteria	Proteobacteria	Alphaproteobacteria	SAR11 clade	Clade II
>ASV_590	18	21	21	0	0	0	0	0	0	0	0	Bacteria	Proteobacteria	Deltaproteobacteria	PB19
>ASV_591	0	0	0	60	0	0	0	0	0	0	0	Bacteria	Bacteroidetes	Bacteroidia	Flavobacteriales	Flavobacteriaceae	NS4 marine group
>ASV_593	0	0	0	0	0	0	0	0	0	59	0	Bacteria	Proteobacteria	Alphaproteobacteria	SAR11 clade	Clade II
>ASV_594	29	29	0	0	0	0	0	0	0	0	0	Bacteria	Proteobacteria	Alphaproteobacteria	Thalassobaculales	uncultured
>ASV_595	0	0	0	0	0	0	0	0	0	0	58	Bacteria	Proteobacteria	Gammaproteobacteria	OM182 clade
>ASV_596	0	0	58	0	0	0	0	0	0	0	0	Bacteria	Proteobacteria	Gammaproteobacteria	SAR86 clade
>ASV_598	0	0	0	0	0	0	0	0	0	0	57	Bacteria	Proteobacteria	Alphaproteobacteria	Rhodobacterales	Rhodobacteraceae	Sulfitobacter
>ASV_599	0	0	57	0	0	0	0	0	0	0	0	Bacteria	Proteobacteria	Deltaproteobacteria	PB19
>ASV_600	0	0	0	5	1	9	9	11	1	11	0	Bacteria	Proteobacteria	Alphaproteobacteria	Rhodospirillales	Magnetospiraceae	uncultured
>ASV_601	10	46	0	0	0	0	0	0	0	0	0	Bacteria	Proteobacteria	Alphaproteobacteria	Rickettsiales	S25-593
>ASV_603	0	0	0	0	21	13	16	6	0	0	0	Bacteria	Bacteroidetes	Bacteroidia	Flavobacteriales	NS7 marine group
>ASV_604	0	0	0	56	0	0	0	0	0	0	0	Bacteria	Proteobacteria	Gammaproteobacteria	Cellvibrionales	Halieaceae	OM60(NOR5) clade
>ASV_605	0	0	0	29	15	12	0	0	0	0	0	Bacteria	Proteobacteria	Gammaproteobacteria	Ga0077536
>ASV_606	0	0	0	0	13	43	0	0	0	0	0	Bacteria	Proteobacteria	Gammaproteobacteria	Cellvibrionales	Halieaceae	OM60(NOR5) clade
>ASV_607	0	0	0	0	21	35	0	0	0	0	0	Bacteria	Proteobacteria	Gammaproteobacteria	Betaproteobacteriales	Methylophilaceae	OM43 clade
>ASV_609	0	0	0	0	0	0	6	9	3	10	2	Bacteria	Proteobacteria	Deltaproteobacteria	Myxococcales	BIrii41
>ASV_611	7	5	43	0	0	0	0	0	0	0	0	Bacteria	Proteobacteria	Alphaproteobacteria	SAR11 clade	Clade I	Clade Ib
>ASV_612	0	0	0	0	13	0	2	0	0	0	40	Bacteria	Proteobacteria	Gammaproteobacteria	Oceanospirillales	Pseudohongiellaceae	Pseudohongiella
>ASV_613	0	0	1	3	4	47	0	0	0	0	0	Bacteria	Proteobacteria	Deltaproteobacteria	Bdellovibrionales	Bdellovibrionaceae	OM27 clade
>ASV_614	0	0	0	0	24	31	0	0	0	0	0	Bacteria	Proteobacteria	Alphaproteobacteria	Rhodobacterales	Rhodobacteraceae	uncultured
>ASV_615	55	0	0	0	0	0	0	0	0	0	0	Bacteria	Proteobacteria	Alphaproteobacteria	Thalassobaculales	uncultured
>ASV_616	0	0	0	0	10	0	4	0	0	5	18	Bacteria	Bacteroidetes	Bacteroidia	Flavobacteriales	Cryomorphaceae	uncultured
>ASV_617	0	54	0	0	0	0	0	0	0	0	0	Bacteria	Marinimicrobia (SAR406 clade)
>ASV_618	0	0	0	0	0	54	0	0	0	0	0	Bacteria	Proteobacteria	Gammaproteobacteria	SAR86 clade
>ASV_619	8	0	0	0	0	46	0	0	0	0	0	Bacteria	Bacteroidetes	Bacteroidia	Flavobacteriales	Cryomorphaceae	uncultured
>ASV_620	41	0	13	0	0	0	0	0	0	0	0	Bacteria	Proteobacteria	Gammaproteobacteria	Oceanospirillales	Litoricolaceae	Litoricola
>ASV_621	0	0	0	0	0	0	0	0	0	0	0	Bacteria	Proteobacteria	Alphaproteobacteria	SAR11 clade	Clade II
>ASV_622	0	0	54	0	0	0	0	0	0	0	0	Bacteria	Proteobacteria	Alphaproteobacteria	Rickettsiales	S25-593
>ASV_623	2	0	0	0	3	0	11	8	3	15	8	Bacteria	Proteobacteria	Alphaproteobacteria	Rhodobacterales	Rhodobacteraceae	Shimia
>ASV_624	0	14	36	3	0	0	0	0	0	0	0	Archaea	Euryarchaeota	Thermoplasmata	Marine Group II
>ASV_625	0	0	0	0	10	0	16	17	0	0	2	Bacteria	Planctomycetes	Phycisphaerae	Phycisphaerales	Phycisphaeraceae	CL500-3
>ASV_626	0	0	52	0	0	0	0	0	0	0	0	Bacteria	Proteobacteria	Gammaproteobacteria	Thiotrichales	Thiotrichaceae	uncultured
>ASV_627	0	0	0	0	0	0	0	6	0	11	32	Bacteria	Proteobacteria	Alphaproteobacteria	Rickettsiales	Anaplasmataceae	uncultured
>ASV_630	51	0	0	0	0	0	0	0	0	0	0	Bacteria	Proteobacteria	Gammaproteobacteria	SAR86 clade
>ASV_631	0	0	0	0	0	0	0	0	0	50	0	Bacteria	Proteobacteria	Deltaproteobacteria	Bdellovibrionales	Bacteriovoracaceae	Peredibacter
>ASV_632	0	0	0	50	0	0	0	0	0	0	0	Bacteria	Verrucomicrobia	Verrucomicrobiae	Opitutales	Puniceicoccaceae	MB11C04 marine group
>ASV_633	0	0	0	11	12	27	0	0	0	0	0	Bacteria	Proteobacteria	Alphaproteobacteria	uncultured
>ASV_634	0	0	0	0	27	23	0	0	0	0	0	Bacteria	Bacteroidetes	Bacteroidia	Flavobacteriales	Flavobacteriaceae	NS5 marine group
>ASV_637	9	40	0	0	0	0	0	0	0	0	0	Bacteria	Proteobacteria	Alphaproteobacteria	Puniceispirillales	SAR116 clade
>ASV_638	16	25	8	0	0	0	0	0	0	0	0	Bacteria	Proteobacteria	Gammaproteobacteria	SAR86 clade
>ASV_639	1	19	0	5	0	23	0	0	1	0	0	Bacteria	Bacteroidetes	Bacteroidia	Flavobacteriales	Flavobacteriaceae	NS5 marine group
>ASV_640	35	9	5	0	0	0	0	0	0	0	0	Bacteria	Proteobacteria	Alphaproteobacteria	Rickettsiales	S25-593
>ASV_641	0	3	0	37	3	6	0	0	0	0	0	Bacteria	Planctomycetes	Phycisphaerae	Phycisphaerales	Phycisphaeraceae	CL500-3
>ASV_642	0	0	0	0	0	0	3	11	0	3	14	Bacteria	Proteobacteria	Gammaproteobacteria	Cellvibrionales	Porticoccaceae	Porticoccus
>ASV_643	0	0	0	0	7	5	3	8	2	2	8	Bacteria	Bacteroidetes	Bacteroidia	Flavobacteriales	Cryomorphaceae	NS10 marine group
>ASV_644	0	18	0	16	0	14	0	0	0	0	0	Bacteria	Proteobacteria	Gammaproteobacteria	OM182 clade
>ASV_645	0	0	0	0	0	48	0	0	0	0	0	Bacteria	Proteobacteria	Gammaproteobacteria	Cellvibrionales	Halieaceae	OM60(NOR5) clade
>ASV_646	0	0	48	0	0	0	0	0	0	0	0	Bacteria	Proteobacteria	Alphaproteobacteria	SAR11 clade	Clade II
>ASV_648	26	2	17	0	2	0	0	0	0	0	0	Bacteria	Proteobacteria	Deltaproteobacteria	Myxococcales	P3OB-42
>ASV_649	0	0	0	0	0	0	0	0	0	0	47	Bacteria	Bacteroidetes	Bacteroidia	Flavobacteriales	Cryomorphaceae	uncultured
>ASV_651	0	0	0	47	0	0	0	0	0	0	0	Bacteria	Verrucomicrobia	Verrucomicrobiae	Arctic97B-4 marine group
>ASV_652	0	0	0	16	4	27	0	0	0	0	0	Bacteria	Bacteroidetes	Bacteroidia	Chitinophagales	Saprospiraceae	uncultured
>ASV_655	0	0	0	3	0	43	0	0	0	0	0	Bacteria	Bacteroidetes	Bacteroidia	Flavobacteriales	Cryomorphaceae	uncultured
>ASV_656	46	0	0	0	0	0	0	0	0	0	0	Bacteria	Cyanobacteria	Oxyphotobacteria	Synechococcales	Cyanobiaceae	Prochlorococcus MIT9313
>ASV_657	0	0	0	0	15	4	13	11	0	1	0	Bacteria	Proteobacteria	Alphaproteobacteria	Rhodobacterales	Rhodobacteraceae	uncultured
>ASV_659	0	22	21	0	0	2	0	0	0	0	0	Bacteria	Proteobacteria	Deltaproteobacteria	Bdellovibrionales	Bdellovibrionaceae	OM27 clade
>ASV_660	5	13	13	9	0	5	0	0	0	0	0	Bacteria	Proteobacteria	Alphaproteobacteria	uncultured
>ASV_661	0	0	0	45	0	0	0	0	0	0	0	Archaea	Thaumarchaeota	Nitrososphaeria	Nitrosopumilales	Nitrosopumilaceae	Candidatus Nitrosopelagicus
>ASV_663	0	0	0	0	0	45	0	0	0	0	0	Bacteria	Proteobacteria	Deltaproteobacteria	PB19
>ASV_664	0	0	0	0	2	1	15	7	9	6	1	Bacteria	Bacteroidetes	Bacteroidia	Cytophagales	Cyclobacteriaceae	uncultured
>ASV_665	4	5	26	9	0	0	0	0	0	0	0	Archaea	Euryarchaeota	Thermoplasmata	Marine Group III
>ASV_666	0	1	0	11	0	32	0	0	0	0	0	Archaea	Euryarchaeota	Thermoplasmata	Marine Group II
>ASV_667	0	0	0	0	0	0	0	0	0	0	44	Bacteria	Proteobacteria	Gammaproteobacteria	Cellvibrionales	Spongiibacteraceae	Sinobacterium
>ASV_669	0	0	0	0	4	0	15	22	0	0	0	Bacteria	Proteobacteria	Gammaproteobacteria	Cellvibrionales	Porticoccaceae	Porticoccus
>ASV_670	0	0	0	0	0	0	0	0	44	0	0	Bacteria	Bacteroidetes	Bacteroidia	Flavobacteriales	Flavobacteriaceae	Aurantivirga
>ASV_671	1	2	1	0	11	1	8	5	4	3	3	Bacteria	Proteobacteria	Alphaproteobacteria	Rhodobacterales	Rhodobacteraceae	uncultured
>ASV_672	14	26	3	0	0	0	0	0	0	0	0	Bacteria	Proteobacteria	Gammaproteobacteria	Ga0077536
>ASV_673	33	9	0	1	0	0	0	0	0	0	0	Bacteria	Proteobacteria	Gammaproteobacteria	Vibrionales	Vibrionaceae	Vibrio
>ASV_674	0	0	0	0	0	43	0	0	0	0	0	Bacteria	Bacteroidetes	Bacteroidia	Flavobacteriales	NS9 marine group
>ASV_675	0	0	43	0	0	0	0	0	0	0	0	Bacteria	Proteobacteria	Alphaproteobacteria	Puniceispirillales	SAR116 clade
>ASV_676	0	0	0	0	0	0	0	0	0	42	0	Bacteria	Proteobacteria	Gammaproteobacteria	Betaproteobacteriales	Methylophilaceae	OM43 clade
>ASV_677	0	42	0	0	0	0	0	0	0	0	0	Bacteria	Proteobacteria	Deltaproteobacteria	SAR324 clade(Marine group B)
>ASV_678	0	42	0	0	0	0	0	0	0	0	0	Bacteria	Proteobacteria	Gammaproteobacteria	Cellvibrionales	Halieaceae	OM60(NOR5) clade
>ASV_680	0	0	0	42	0	0	0	0	0	0	0	Bacteria	Marinimicrobia (SAR406 clade)
>ASV_684	0	0	41	0	0	0	0	0	0	0	0	Bacteria	Proteobacteria	Alphaproteobacteria	SAR11 clade	Clade II
>ASV_685	0	0	41	0	0	0	0	0	0	0	0	Bacteria	Proteobacteria	Alphaproteobacteria	Parvibaculales	Parvibaculaceae	uncultured
>ASV_687	0	0	0	0	6	0	10	9	4	2	2	Bacteria	Actinobacteria	Actinobacteria	PeM15
>ASV_688	22	18	0	0	0	0	0	0	0	0	0	Bacteria	Proteobacteria	Alphaproteobacteria	Rickettsiales	S25-593
>ASV_689	0	0	0	1	21	17	1	0	0	0	0	Bacteria	Bacteroidetes	Bacteroidia	Cytophagales	Cyclobacteriaceae	uncultured
>ASV_691	0	0	40	0	0	0	0	0	0	0	0	Bacteria	Bacteroidetes	Bacteroidia	Flavobacteriales	NS9 marine group
>ASV_692	0	0	40	0	0	0	0	0	0	0	0	Bacteria	Proteobacteria	Alphaproteobacteria	Parvibaculales	PS1 clade
>ASV_693	0	0	0	0	0	0	4	15	0	4	3	Bacteria	Proteobacteria	Gammaproteobacteria	Betaproteobacteriales	Methylophilaceae	OM43 clade
>ASV_695	0	39	0	0	0	0	0	0	0	0	0	Bacteria	Bacteroidetes	Bacteroidia	Flavobacteriales	NS9 marine group
>ASV_698	24	11	4	0	0	0	0	0	0	0	0	Bacteria	Proteobacteria	Alphaproteobacteria	Rickettsiales	S25-593
>ASV_700	0	0	14	0	5	0	0	13	2	0	4	Bacteria	Proteobacteria	Alphaproteobacteria	Rhodobacterales	Rhodobacteraceae	Silicimonas
>ASV_702	0	0	39	0	0	0	0	0	0	0	0	Bacteria	Proteobacteria	Alphaproteobacteria	Thalassobaculales	uncultured
>ASV_703	0	0	39	0	0	0	0	0	0	0	0	Bacteria	Bacteroidetes	Bacteroidia	Flavobacteriales	NS7 marine group
>ASV_704	12	15	0	0	6	0	0	5	0	0	0	Bacteria	Bacteroidetes	Bacteroidia	Flavobacteriales	Flavobacteriaceae	Winogradskyella
>ASV_705	0	0	0	0	0	0	0	0	0	0	38	Bacteria	Actinobacteria	Acidimicrobiia	Microtrichales	Ilumatobacteraceae	Ilumatobacter
>ASV_707	38	0	0	0	0	0	0	0	0	0	0	Bacteria	Proteobacteria	Gammaproteobacteria	SAR86 clade
>ASV_708	0	0	38	0	0	0	0	0	0	0	0	Bacteria	Proteobacteria	Alphaproteobacteria	uncultured
>ASV_711	3	0	0	9	22	0	0	0	1	2	0	Archaea	Thaumarchaeota	Nitrososphaeria	Nitrosopumilales	Nitrosopumilaceae	Candidatus Nitrosopumilus
>ASV_712	0	0	37	0	0	0	0	0	0	0	0	Bacteria	Marinimicrobia (SAR406 clade)
>ASV_713	0	0	37	0	0	0	0	0	0	0	0	Bacteria	Cyanobacteria	Oxyphotobacteria	Synechococcales	Cyanobiaceae	Prochlorococcus MIT9313
>ASV_714	0	0	0	0	0	0	0	7	0	15	3	Bacteria	Proteobacteria	Gammaproteobacteria	Betaproteobacteriales	Burkholderiaceae	MWH-UniP1 aquatic group
>ASV_716	0	36	0	0	0	0	0	0	0	0	0	Bacteria	Cyanobacteria	Oxyphotobacteria	Synechococcales	Cyanobiaceae	Prochlorococcus MIT9313
>ASV_717	20	13	3	0	0	0	0	0	0	0	0	Bacteria	Proteobacteria	Gammaproteobacteria	Cellvibrionales	Porticoccaceae	SAR92 clade
>ASV_718	0	0	0	0	0	36	0	0	0	0	0	Bacteria	Bacteroidetes	Bacteroidia	Flavobacteriales	Flavobacteriaceae	uncultured
>ASV_719	36	0	0	0	0	0	0	0	0	0	0	Bacteria	Proteobacteria	Alphaproteobacteria	uncultured
>ASV_721	0	35	0	0	0	0	0	0	0	0	0	Bacteria	Proteobacteria	Alphaproteobacteria	uncultured
>ASV_722	0	0	1	0	4	0	6	5	0	0	19	Bacteria	Bacteroidetes	Bacteroidia	Flavobacteriales	Cryomorphaceae	uncultured
>ASV_723	0	0	0	35	0	0	0	0	0	0	0	Bacteria	Verrucomicrobia	Verrucomicrobiae	Arctic97B-4 marine group
>ASV_724	0	0	0	22	0	13	0	0	0	0	0	Bacteria	Marinimicrobia (SAR406 clade)
>ASV_725	0	0	0	0	0	35	0	0	0	0	0	Bacteria	Bacteroidetes	Bacteroidia	Flavobacteriales	NS7 marine group
>ASV_727	0	0	0	0	2	0	5	4	1	6	16	Bacteria	Proteobacteria	Alphaproteobacteria	Paracaedibacterales	Paracaedibacteraceae	uncultured
>ASV_730	14	14	0	0	2	4	0	0	0	0	0	Bacteria	Proteobacteria	Gammaproteobacteria	Ectothiorhodospirales	Ectothiorhodospiraceae	uncultured
>ASV_731	0	4	0	0	14	2	4	5	0	0	1	Bacteria	Proteobacteria	Alphaproteobacteria	Rhodospirillales	AEGEAN-169 marine group
>ASV_732	0	0	0	0	19	3	2	7	0	0	0	Bacteria	Verrucomicrobia	Verrucomicrobiae	Verrucomicrobiales	Rubritaleaceae	Rubritalea
>ASV_733	0	0	0	0	34	0	0	0	0	0	0	Bacteria	Planctomycetes	Planctomycetacia	Pirellulales	Pirellulaceae	uncultured
>ASV_735	0	0	34	0	0	0	0	0	0	0	0	Bacteria	Proteobacteria	Gammaproteobacteria	Alteromonadales	Marinobacteraceae	Marinobacter
>ASV_736	0	0	34	0	0	0	0	0	0	0	0	Bacteria	Proteobacteria	Alphaproteobacteria	Rickettsiales	S25-593
>ASV_738	0	0	33	0	0	0	0	0	0	0	0	Bacteria	Proteobacteria	Gammaproteobacteria	SAR86 clade
>ASV_739	0	0	33	0	0	0	0	0	0	0	0	Bacteria	Verrucomicrobia	Verrucomicrobiae	Opitutales	Puniceicoccaceae	Lentimonas
>ASV_740	0	0	0	0	0	0	0	0	0	32	0	Bacteria	Proteobacteria	Gammaproteobacteria	SAR86 clade
>ASV_741	0	0	15	2	2	0	2	0	2	7	2	Bacteria	Proteobacteria	Alphaproteobacteria	Micavibrionales	uncultured
>ASV_743	0	27	0	5	0	0	0	0	0	0	0	Bacteria	Proteobacteria	Deltaproteobacteria	Myxococcales	P3OB-42
>ASV_744	16	15	1	0	0	0	0	0	0	0	0	Bacteria	Proteobacteria	Alphaproteobacteria	SAR11 clade	Clade I	uncultured
>ASV_747	0	0	0	0	0	0	32	0	0	0	0	Bacteria	Bacteroidetes	Bacteroidia	Flavobacteriales	NS9 marine group
>ASV_748	0	0	0	0	0	0	29	3	0	0	0	Bacteria	Fibrobacteres	Fibrobacteria	Fibrobacterales	Fibrobacteraceae	uncultured
>ASV_749	32	0	0	0	0	0	0	0	0	0	0	Bacteria	Proteobacteria	Gammaproteobacteria	Cellvibrionales	Halieaceae	OM60(NOR5) clade
>ASV_751	0	0	32	0	0	0	0	0	0	0	0	Bacteria	Proteobacteria	Alphaproteobacteria	SAR11 clade	Clade III
>ASV_752	0	0	32	0	0	0	0	0	0	0	0	Bacteria	Proteobacteria	Alphaproteobacteria	Thalassobaculales	Nisaeaceae	OM75 clade
>ASV_754	0	31	0	0	0	0	0	0	0	0	0	Bacteria	Proteobacteria	Alphaproteobacteria	Puniceispirillales	SAR116 clade
>ASV_755	0	31	0	0	0	0	0	0	0	0	0	Bacteria	Proteobacteria	Alphaproteobacteria	Rickettsiales	S25-593
>ASV_756	0	20	0	11	0	0	0	0	0	0	0	Bacteria	Chloroflexi	Dehalococcoidia	SAR202 clade
>ASV_758	0	0	0	0	4	4	0	19	0	0	4	Bacteria	Planctomycetes	Phycisphaerae	Phycisphaerales	Phycisphaeraceae	CL500-3
>ASV_759	0	0	0	31	0	0	0	0	0	0	0	Bacteria	Planctomycetes	Planctomycetacia	Planctomycetales	Rubinisphaeraceae	uncultured
>ASV_760	0	0	0	5	0	26	0	0	0	0	0	Bacteria	Bacteroidetes	Bacteroidia	Chitinophagales	Saprospiraceae	uncultured
>ASV_762	0	0	0	0	31	0	0	0	0	0	0	Bacteria	Bacteroidetes	Bacteroidia	Flavobacteriales	Flavobacteriaceae	Pseudofulvibacter
>ASV_763	0	0	31	0	0	0	0	0	0	0	0	Bacteria	Marinimicrobia (SAR406 clade)
>ASV_764	0	0	0	0	0	0	0	0	0	30	0	Bacteria	Proteobacteria	Gammaproteobacteria	Oceanospirillales	Nitrincolaceae	Amphritea
>ASV_765	3	0	2	0	8	0	2	7	1	1	3	Bacteria	Proteobacteria	Gammaproteobacteria	Oceanospirillales	Alcanivoracaceae	Alcanivorax
>ASV_766	13	15	0	0	0	0	0	0	2	0	0	Bacteria	Proteobacteria	Alphaproteobacteria	SAR11 clade	Clade III
>ASV_767	0	0	0	0	0	0	30	0	0	0	0	Bacteria	Bacteroidetes	Bacteroidia	Flavobacteriales	NS9 marine group
>ASV_768	0	0	0	30	0	0	0	0	0	0	0	Bacteria	Proteobacteria	Gammaproteobacteria	SAR86 clade
>ASV_769	0	0	0	0	0	30	0	0	0	0	0	Bacteria	Cyanobacteria	Oxyphotobacteria	Synechococcales	Cyanobiaceae	Synechococcus CC9902
>ASV_770	30	0	0	0	0	0	0	0	0	0	0	Bacteria	Verrucomicrobia	Verrucomicrobiae	Opitutales	Puniceicoccaceae	Lentimonas
>ASV_771	0	0	0	0	0	0	0	0	0	10	6	Bacteria	Marinimicrobia (SAR406 clade)
>ASV_773	0	29	0	0	0	0	0	0	0	0	0	Bacteria	Proteobacteria	Alphaproteobacteria	Rickettsiales	S25-593
>ASV_774	0	29	0	0	0	0	0	0	0	0	0	Bacteria	Proteobacteria	Alphaproteobacteria	Rhodobacterales	Rhodobacteraceae	uncultured
>ASV_775	11	18	0	0	0	0	0	0	0	0	0	Bacteria	Bacteroidetes	Bacteroidia	Flavobacteriales	Flavobacteriaceae	NS5 marine group
>ASV_776	0	0	0	29	0	0	0	0	0	0	0	Bacteria	Bacteroidetes	Bacteroidia	Flavobacteriales	Flavobacteriaceae	NS5 marine group
>ASV_777	0	0	22	7	0	0	0	0	0	0	0	Bacteria	Proteobacteria	Alphaproteobacteria	uncultured
>ASV_778	0	0	0	7	22	0	0	0	0	0	0	Archaea	Euryarchaeota	Thermoplasmata	Marine Group II
>ASV_779	0	0	0	0	10	19	0	0	0	0	0	Bacteria	Bacteroidetes	Bacteroidia	Cytophagales	Cyclobacteriaceae	Marinoscillum
>ASV_780	29	0	0	0	0	0	0	0	0	0	0	Bacteria	Bacteroidetes	Bacteroidia	Flavobacteriales	Flavobacteriaceae	NS2b marine group
>ASV_781	0	0	29	0	0	0	0	0	0	0	0	Bacteria	Verrucomicrobia	Verrucomicrobiae	Opitutales	Puniceicoccaceae	Cerasicoccus
>ASV_782	0	0	29	0	0	0	0	0	0	0	0	Bacteria	Proteobacteria	Alphaproteobacteria	Puniceispirillales	SAR116 clade	Candidatus Puniceispirillum
>ASV_783	1	4	0	1	0	0	0	0	0	22	0	Bacteria	Proteobacteria	Alphaproteobacteria	Rickettsiales	SM2D12
>ASV_784	0	0	0	0	0	0	4	9	5	7	0	Bacteria	Bacteroidetes	Bacteroidia	Flavobacteriales	Cryomorphaceae	uncultured
>ASV_785	0	0	0	2	0	0	3	0	4	1	17	Bacteria	Bacteroidetes	Rhodothermia	Balneolales	Balneolaceae	Balneola
>ASV_786	0	28	0	0	0	0	0	0	0	0	0	Bacteria	Bacteroidetes	Bacteroidia	Flavobacteriales	Flavobacteriaceae	NS5 marine group
>ASV_787	0	28	0	0	0	0	0	0	0	0	0	Bacteria	Proteobacteria	Alphaproteobacteria	Parvibaculales	OCS116 clade
>ASV_788	0	28	0	0	0	0	0	0	0	0	0	Bacteria	Marinimicrobia (SAR406 clade)
>ASV_790	0	28	0	0	0	0	0	0	0	0	0	Bacteria	Proteobacteria	Alphaproteobacteria	Rhodospirillales	Magnetospiraceae	uncultured
>ASV_792	12	16	0	0	0	0	0	0	0	0	0	Bacteria	Proteobacteria	Gammaproteobacteria	Oceanospirillales	Litoricolaceae	Litoricola
>ASV_793	0	0	0	0	0	0	0	0	0	0	28	Bacteria	Bacteroidetes	Bacteroidia	Flavobacteriales	NS9 marine group
>ASV_794	0	0	0	0	0	0	28	0	0	0	0	Bacteria	Bacteroidetes	Bacteroidia	Flavobacteriales	NS9 marine group
>ASV_795	0	0	28	0	0	0	0	0	0	0	0	Bacteria	Proteobacteria	Deltaproteobacteria	PB19
>ASV_796	0	0	28	0	0	0	0	0	0	0	0	Bacteria	Proteobacteria	Alphaproteobacteria	Micavibrionales	Micavibrionaceae	uncultured
>ASV_797	0	0	28	0	0	0	0	0	0	0	0	Bacteria	Proteobacteria	Deltaproteobacteria	PB19
>ASV_798	0	0	28	0	0	0	0	0	0	0	0	Bacteria	Proteobacteria	Alphaproteobacteria	uncultured
>ASV_800	0	0	0	27	0	0	0	0	0	0	0	Bacteria	Proteobacteria	Alphaproteobacteria	uncultured
>ASV_801	0	0	0	27	0	0	0	0	0	0	0	Bacteria	Proteobacteria	Gammaproteobacteria	Cellvibrionales	Porticoccaceae	SAR92 clade
>ASV_802	0	0	27	0	0	0	0	0	0	0	0	Bacteria	Proteobacteria	Deltaproteobacteria	Bdellovibrionales	Bdellovibrionaceae	OM27 clade
>ASV_803	0	0	0	0	1	0	1	2	1	15	4	Bacteria	Proteobacteria	Alphaproteobacteria	SAR11 clade	Clade III
>ASV_804	0	0	0	0	2	0	6	10	3	5	0	Bacteria	Proteobacteria	Alphaproteobacteria	Rhodobacterales	Rhodobacteraceae	Leisingera
>ASV_806	5	19	0	2	0	0	0	0	0	0	0	Bacteria	Proteobacteria	Alphaproteobacteria	Rickettsiales	SM2D12
>ASV_807	0	0	0	0	0	0	0	0	0	0	26	Bacteria	Proteobacteria	Gammaproteobacteria	Enterobacteriales	Enterobacteriaceae	endosymbionts2
>ASV_808	0	0	0	0	0	0	26	0	0	0	0	Bacteria	Bacteroidetes	Bacteroidia	Flavobacteriales	Flavobacteriaceae	NS5 marine group
>ASV_809	0	0	0	15	5	0	4	0	0	0	0	Bacteria	Proteobacteria	Deltaproteobacteria	Desulfarculales	Desulfarculaceae	uncultured
>ASV_810	6	0	0	12	0	8	0	0	0	0	0	Bacteria	Bacteroidetes	Bacteroidia	Flavobacteriales	NS9 marine group
>ASV_813	0	25	0	0	0	0	0	0	0	0	0	Bacteria	Proteobacteria	Alphaproteobacteria	Puniceispirillales	SAR116 clade
>ASV_814	0	25	0	0	0	0	0	0	0	0	0	Bacteria	Proteobacteria	Alphaproteobacteria	Rhodobacterales	Rhodobacteraceae	uncultured
>ASV_817	0	0	15	0	5	0	0	0	0	0	5	Bacteria	Bacteroidetes	Bacteroidia	Flavobacteriales	Flavobacteriaceae	Muricauda
>ASV_818	0	0	0	0	0	0	8	0	0	0	0	Bacteria	Marinimicrobia (SAR406 clade)
>ASV_819	0	0	0	11	0	14	0	0	0	0	0	Bacteria	Proteobacteria	Alphaproteobacteria	SAR11 clade	Clade I	Clade Ia
>ASV_821	0	0	0	0	13	12	0	0	0	0	0	Bacteria	Proteobacteria	Alphaproteobacteria	uncultured
>ASV_823	0	0	25	0	0	0	0	0	0	0	0	Bacteria	Marinimicrobia (SAR406 clade)
>ASV_824	0	0	25	0	0	0	0	0	0	0	0	Bacteria	Verrucomicrobia	Verrucomicrobiae	Opitutales	Puniceicoccaceae	MB11C04 marine group
>ASV_825	0	0	25	0	0	0	0	0	0	0	0	Bacteria	PAUC34f
>ASV_826	0	0	25	0	0	0	0	0	0	0	0	Bacteria	Proteobacteria	Alphaproteobacteria	Rickettsiales	S25-593
>ASV_831	0	0	0	24	0	0	0	0	0	0	0	Bacteria	Planctomycetes	Planctomycetacia	Pirellulales	Pirellulaceae	Rhodopirellula
>ASV_833	24	0	0	0	0	0	0	0	0	0	0	Bacteria	Proteobacteria	Gammaproteobacteria	SAR86 clade
>ASV_834	0	0	24	0	0	0	0	0	0	0	0	Bacteria	Verrucomicrobia	Verrucomicrobiae	Opitutales	Puniceicoccaceae	MB11C04 marine group
>ASV_835	0	23	0	0	0	0	0	0	0	0	0	Bacteria	Proteobacteria	Alphaproteobacteria	SAR11 clade	Clade I	Clade Ib
>ASV_836	0	0	7	0	5	2	1	2	4	0	0	Bacteria	Bacteroidetes	Bacteroidia	Chitinophagales	Saprospiraceae	uncultured
>ASV_838	0	0	0	0	0	23	0	0	0	0	0	Bacteria	Bacteroidetes	Bacteroidia	Flavobacteriales	Flavobacteriaceae	NS5 marine group
>ASV_841	0	22	0	0	0	0	0	0	0	0	0	Bacteria	Proteobacteria	Gammaproteobacteria	Cellvibrionales	Halieaceae	OM60(NOR5) clade
>ASV_843	0	0	0	0	0	0	0	0	0	0	22	Bacteria	Proteobacteria	Gammaproteobacteria	Enterobacteriales	Enterobacteriaceae	endosymbionts2
>ASV_844	0	0	2	0	1	0	1	14	0	0	4	Bacteria	Proteobacteria	Gammaproteobacteria	Legionellales	Legionellaceae	Legionella
>ASV_845	0	0	0	22	0	0	0	0	0	0	0	Bacteria	Proteobacteria	Alphaproteobacteria	uncultured
>ASV_846	0	0	6	16	0	0	0	0	0	0	0	Bacteria	Proteobacteria	Gammaproteobacteria	Gammaproteobacteria Incertae Sedis	Unknown Family
>ASV_847	7	0	10	5	0	0	0	0	0	0	0	Bacteria	Actinobacteria	Acidimicrobiia	Microtrichales	Microtrichaceae	Sva0996 marine group
>ASV_849	0	0	0	0	22	0	0	0	0	0	0	Bacteria	Verrucomicrobia	Verrucomicrobiae	Opitutales	Puniceicoccaceae	Pelagicoccus
>ASV_851	0	0	0	0	0	0	0	0	0	0	0	Bacteria	Proteobacteria	Gammaproteobacteria	SAR86 clade
>ASV_853	0	0	22	0	0	0	0	0	0	0	0	Bacteria	Proteobacteria	Alphaproteobacteria	uncultured
>ASV_854	0	0	22	0	0	0	0	0	0	0	0	Bacteria	Bacteroidetes	Bacteroidia	Flavobacteriales	Flavobacteriaceae	NS4 marine group
>ASV_855	0	0	22	0	0	0	0	0	0	0	0	Bacteria	Proteobacteria	Alphaproteobacteria	Micavibrionales	Micavibrionaceae	uncultured
>ASV_856	0	21	0	0	0	0	0	0	0	0	0	Bacteria	Proteobacteria	Deltaproteobacteria	Bdellovibrionales	Bacteriovoracaceae	uncultured
>ASV_859	5	14	0	0	0	0	0	0	2	0	0	Bacteria	Bacteroidetes	Bacteroidia	Flavobacteriales	Flavobacteriaceae	uncultured
>ASV_860	10	2	9	0	0	0	0	0	0	0	0	Bacteria	Bacteroidetes	Bacteroidia	Flavobacteriales	Flavobacteriaceae	NS5 marine group
>ASV_861	0	0	0	0	0	0	0	0	0	0	21	Bacteria	Bacteroidetes	Bacteroidia	Flavobacteriales	Flavobacteriaceae	NS5 marine group
>ASV_863	0	0	0	21	0	0	0	0	0	0	0	Bacteria	Proteobacteria	Gammaproteobacteria	SAR86 clade
>ASV_865	0	0	0	0	0	21	0	0	0	0	0	Bacteria	Marinimicrobia (SAR406 clade)
>ASV_868	13	0	0	0	0	8	0	0	0	0	0	Bacteria	Proteobacteria	Alphaproteobacteria	Rickettsiales	Rickettsiaceae	Candidatus Megaira
>ASV_869	0	0	0	0	21	0	0	0	0	0	0	Bacteria	Actinobacteria	Acidimicrobiia	Microtrichales	Microtrichaceae	Sva0996 marine group
>ASV_870	0	0	0	0	0	0	0	0	0	0	0	Bacteria	Proteobacteria	Gammaproteobacteria	Oceanospirillales	Nitrincolaceae	uncultured
>ASV_873	0	0	0	0	0	0	0	0	0	7	0	Bacteria	Verrucomicrobia	Verrucomicrobiae	Opitutales	Puniceicoccaceae	MB11C04 marine group
>ASV_875	0	20	0	0	0	0	0	0	0	0	0	Bacteria	Proteobacteria	Alphaproteobacteria	Rickettsiales	S25-593
>ASV_876	0	20	0	0	0	0	0	0	0	0	0	Bacteria	Proteobacteria	Alphaproteobacteria	Rickettsiales	S25-593
>ASV_879	0	0	0	0	0	0	20	0	0	0	0	Bacteria	Bacteroidetes	Bacteroidia	Flavobacteriales	Flavobacteriaceae	NS5 marine group
>ASV_880	0	0	0	20	0	0	0	0	0	0	0	Bacteria	Proteobacteria	Gammaproteobacteria	UBA10353 marine group
>ASV_881	0	0	0	0	0	20	0	0	0	0	0	Bacteria	Proteobacteria	Alphaproteobacteria	Puniceispirillales	SAR116 clade
>ASV_882	0	0	0	0	0	11	0	9	0	0	0	Bacteria	Proteobacteria	Gammaproteobacteria	SAR86 clade
>ASV_885	0	0	0	0	20	0	0	0	0	0	0	Bacteria	Verrucomicrobia	Verrucomicrobiae	Verrucomicrobiales	DEV007
>ASV_887	0	19	0	0	0	0	0	0	0	0	0	Bacteria	Proteobacteria	Gammaproteobacteria	Coxiellales	Coxiellaceae	Coxiella
>ASV_888	0	19	0	0	0	0	0	0	0	0	0	Bacteria	Proteobacteria	Deltaproteobacteria	Oligoflexales	Oligoflexaceae	uncultured
>ASV_889	0	0	0	0	0	0	0	0	0	0	19	Bacteria	Proteobacteria	Gammaproteobacteria	Cellvibrionales	Porticoccaceae	SAR92 clade
>ASV_890	0	0	0	0	0	0	0	0	0	0	19	Bacteria	Bacteroidetes	Bacteroidia	Flavobacteriales	NS9 marine group
>ASV_891	0	0	0	0	0	0	3	0	4	0	12	Bacteria	Planctomycetes	Planctomycetacia	Pirellulales	Pirellulaceae	Blastopirellula
>ASV_894	1	0	8	0	0	0	1	0	8	0	1	Bacteria	Dadabacteria	Dadabacteriia	Dadabacteriales
>ASV_895	0	0	0	19	0	0	0	0	0	0	0	Bacteria	Bacteroidetes	Bacteroidia	Flavobacteriales	NS9 marine group
>ASV_896	0	0	0	0	0	19	0	0	0	0	0	Bacteria	Planctomycetes	Phycisphaerae	Phycisphaerales	Phycisphaeraceae	CL500-3
>ASV_898	0	0	17	0	0	2	0	0	0	0	0	Bacteria	Bacteroidetes	Bacteroidia	Flavobacteriales	Flavobacteriaceae	Winogradskyella
>ASV_901	0	0	0	0	0	0	4	4	0	4	2	Bacteria	Proteobacteria	Alphaproteobacteria	SAR11 clade	Clade III
>ASV_902	0	0	0	0	0	0	6	0	0	3	0	Archaea	Euryarchaeota	Thermoplasmata	Marine Group II
>ASV_903	0	12	0	6	0	0	0	0	0	0	0	Bacteria	Marinimicrobia (SAR406 clade)
>ASV_904	0	0	0	0	0	0	0	0	0	0	18	Bacteria	Proteobacteria	Alphaproteobacteria	Rhodobacterales	Rhodobacteraceae	Sedimentitalea
>ASV_905	0	0	0	0	0	0	0	0	0	0	18	Bacteria	Bacteroidetes	Bacteroidia	Flavobacteriales	Cryomorphaceae	uncultured
>ASV_906	0	0	1	0	0	0	0	0	0	0	3	Bacteria	Dependentiae	Babeliae	Babeliales
>ASV_907	0	0	0	18	0	0	0	0	0	0	0	Bacteria	Proteobacteria	Gammaproteobacteria	HOC36
>ASV_909	0	0	0	0	0	18	0	0	0	0	0	Bacteria	Cyanobacteria	Oxyphotobacteria	Phormidesmiales	Phormidesmiaceae	Phormidesmis ANT.LACV5.1
>ASV_910	0	0	0	0	0	18	0	0	0	0	0	Bacteria	Proteobacteria	Deltaproteobacteria	Myxococcales	BIrii41
>ASV_911	0	0	0	0	0	18	0	0	0	0	0	Bacteria	Bacteroidetes	Bacteroidia	Flavobacteriales	NS9 marine group
>ASV_913	0	0	0	0	0	0	0	0	0	17	0	Bacteria	Proteobacteria	Gammaproteobacteria	Steroidobacterales	Woeseiaceae	Woeseia
>ASV_918	0	17	0	0	0	0	0	0	0	0	0	Bacteria	Proteobacteria	Alphaproteobacteria	Rickettsiales	S25-593
>ASV_919	8	7	0	2	0	0	0	0	0	0	0	Bacteria	Proteobacteria	Alphaproteobacteria	SAR11 clade	Clade I	Clade Ib
>ASV_920	0	7	0	4	0	4	2	0	0	0	0	Bacteria	Proteobacteria	Deltaproteobacteria	Bdellovibrionales	Bdellovibrionaceae	OM27 clade
>ASV_921	0	0	0	0	0	0	0	0	0	0	17	Bacteria	Proteobacteria	Gammaproteobacteria	Cellvibrionales	Halieaceae	Halioglobus
>ASV_922	0	0	2	0	8	6	0	0	0	0	1	Bacteria	Bacteroidetes	Bacteroidia	Chitinophagales	Saprospiraceae	uncultured
>ASV_923	0	0	0	0	0	0	17	0	0	0	0	Bacteria	Planctomycetes	Phycisphaerae	Phycisphaerales	Phycisphaeraceae	CL500-3
>ASV_924	0	0	0	17	0	0	0	0	0	0	0	Bacteria	Marinimicrobia (SAR406 clade)
>ASV_925	0	0	0	0	0	0	0	0	17	0	0	Bacteria	Proteobacteria	Alphaproteobacteria	Rhodobacterales	Rhodobacteraceae	Roseobacter clade NAC11-7 lineage
>ASV_926	0	0	0	0	2	15	0	0	0	0	0	Bacteria	Proteobacteria	Alphaproteobacteria	SAR11 clade	Clade III
>ASV_927	2	0	0	0	7	8	0	0	0	0	0	Bacteria	Bacteroidetes	Bacteroidia	Chitinophagales	Saprospiraceae	Saprospira
>ASV_928	0	0	17	0	0	0	0	0	0	0	0	Bacteria	Proteobacteria	Gammaproteobacteria	KI89A clade
>ASV_929	0	0	17	0	0	0	0	0	0	0	0	Bacteria	Proteobacteria	Deltaproteobacteria	Bdellovibrionales	Bdellovibrionaceae	OM27 clade
>ASV_931	0	0	0	0	0	0	0	0	0	16	0	Bacteria	Proteobacteria	Alphaproteobacteria	Rhodobacterales	Rhodobacteraceae	uncultured
>ASV_932	0	0	0	0	0	0	0	0	4	8	4	Bacteria	Proteobacteria	Deltaproteobacteria	Bdellovibrionales	Bacteriovoracaceae	Peredibacter
>ASV_934	0	16	0	0	0	0	0	0	0	0	0	Bacteria	Proteobacteria	Deltaproteobacteria	PB19
>ASV_935	0	16	0	0	0	0	0	0	0	0	0	Bacteria	Kiritimatiellaeota	Kiritimatiellae	Kiritimatiellales	Kiritimatiellaceae	R76-B128
>ASV_939	0	0	0	0	0	0	0	0	0	0	16	Bacteria	Verrucomicrobia	Verrucomicrobiae	Verrucomicrobiales	Rubritaleaceae	Rubritalea
>ASV_940	0	0	0	0	0	0	16	0	0	0	0	Bacteria	Bacteroidetes	Bacteroidia	Flavobacteriales	NS9 marine group
>ASV_942	0	0	0	16	0	0	0	0	0	0	0	Bacteria	Marinimicrobia (SAR406 clade)
>ASV_944	0	0	0	0	0	16	0	0	0	0	0	Bacteria	Proteobacteria	Gammaproteobacteria	Piscirickettsiales	Piscirickettsiaceae	Candidatus Endoecteinascidia
>ASV_945	16	0	0	0	0	0	0	0	0	0	0	Bacteria	Bacteroidetes	Bacteroidia	Flavobacteriales	Cryomorphaceae	uncultured
>ASV_946	0	0	0	0	16	0	0	0	0	0	0	Bacteria	Bacteroidetes	Bacteroidia	Flavobacteriales	NS9 marine group
>ASV_948	0	0	16	0	0	0	0	0	0	0	0	Bacteria	Proteobacteria	Alphaproteobacteria	uncultured
>ASV_950	0	0	16	0	0	0	0	0	0	0	0	Bacteria	Proteobacteria	Alphaproteobacteria	Rickettsiales	S25-593
>ASV_951	0	0	16	0	0	0	0	0	0	0	0	Bacteria	Proteobacteria	Gammaproteobacteria	Coxiellales	Coxiellaceae	Coxiella
>ASV_952	0	15	0	0	0	0	0	0	0	0	0	Bacteria	Proteobacteria	Gammaproteobacteria	Oceanospirillales	Litoricolaceae	Litoricola
>ASV_957	0	0	0	15	0	0	0	0	0	0	0	Bacteria	Marinimicrobia (SAR406 clade)
>ASV_958	0	0	0	0	0	15	0	0	0	0	0	Bacteria	Proteobacteria	Deltaproteobacteria	Bdellovibrionales	Bdellovibrionaceae	OM27 clade
>ASV_959	0	0	0	0	0	15	0	0	0	0	0	Bacteria	Bacteroidetes	Bacteroidia	Flavobacteriales	Flavobacteriaceae	NS5 marine group
>ASV_961	0	0	0	0	12	3	0	0	0	0	0	Bacteria	Bacteroidetes	Bacteroidia	Flavobacteriales	NS9 marine group
>ASV_963	15	0	0	0	0	0	0	0	0	0	0	Bacteria	Verrucomicrobia	Verrucomicrobiae	Opitutales	Puniceicoccaceae	MB11C04 marine group
>ASV_964	15	0	0	0	0	0	0	0	0	0	0	Bacteria	Bacteroidetes	Bacteroidia	Flavobacteriales	Flavobacteriaceae	Tenacibaculum
>ASV_969	0	0	0	0	0	0	0	0	0	14	0	Bacteria	Proteobacteria	Alphaproteobacteria	SAR11 clade	Clade I	Clade Ia
>ASV_970	0	0	0	0	0	0	0	3	0	11	0	Bacteria	Proteobacteria	Alphaproteobacteria	Rhodospirillales	Terasakiellaceae	uncultured
>ASV_972	0	0	0	0	0	0	0	0	0	0	14	Bacteria	Proteobacteria	Deltaproteobacteria	Bdellovibrionales	Bacteriovoracaceae	Peredibacter
>ASV_973	0	0	0	0	0	0	1	2	0	0	7	Bacteria	Proteobacteria	Deltaproteobacteria	Bdellovibrionales	Bdellovibrionaceae	OM27 clade
>ASV_974	0	0	0	0	0	0	6	2	0	0	1	Archaea	Thaumarchaeota	Nitrososphaeria	Nitrosopumilales	Nitrosopumilaceae	Candidatus Nitrosopumilus
>ASV_977	0	0	0	14	0	0	0	0	0	0	0	Bacteria	Proteobacteria	Alphaproteobacteria	Rhodospirillales	Magnetospiraceae	uncultured
>ASV_980	0	0	0	0	0	0	0	14	0	0	0	Bacteria	Bacteroidetes	Bacteroidia	Flavobacteriales	NS9 marine group
>ASV_981	0	0	0	0	0	0	0	4	0	0	0	Bacteria	Proteobacteria	Gammaproteobacteria	Oceanospirillales	Litoricolaceae	Litoricola
>ASV_982	0	0	0	0	0	0	0	0	0	0	0	Bacteria	Proteobacteria	Gammaproteobacteria	Cellvibrionales	Spongiibacteraceae	BD1-7 clade
>ASV_984	0	0	14	0	0	0	0	0	0	0	0	Bacteria	Proteobacteria	Deltaproteobacteria	Bdellovibrionales	Bdellovibrionaceae	OM27 clade
>ASV_985	0	0	14	0	0	0	0	0	0	0	0	Bacteria	Proteobacteria	Alphaproteobacteria	SAR11 clade	Clade III
>ASV_986	0	0	14	0	0	0	0	0	0	0	0	Bacteria	Proteobacteria	Alphaproteobacteria	Micavibrionales	Micavibrionaceae	uncultured
>ASV_987	0	0	14	0	0	0	0	0	0	0	0	Bacteria	Cyanobacteria	Oxyphotobacteria	Nostocales	Microcystaceae	Crocosphaera WH 0003 (UCYN-B)
>ASV_988	0	0	14	0	0	0	0	0	0	0	0	Bacteria	Proteobacteria	Deltaproteobacteria	Bdellovibrionales	Bdellovibrionaceae	OM27 clade
>ASV_990	0	0	0	0	0	0	0	0	0	13	0	Bacteria	Proteobacteria	Alphaproteobacteria	Rickettsiales	Anaplasmataceae
>ASV_991	0	13	0	0	0	0	0	0	0	0	0	Bacteria	Proteobacteria	Alphaproteobacteria	Thalassobaculales	uncultured
>ASV_993	0	0	0	0	0	0	0	0	0	0	13	Bacteria	Bacteroidetes	Bacteroidia	Flavobacteriales	Flavobacteriaceae	Psychroserpens
>ASV_994	0	0	0	0	4	0	0	0	0	0	9	Bacteria	Proteobacteria	Alphaproteobacteria	Rickettsiales	Midichloriaceae	MD3-55
>ASV_995	0	0	0	0	0	0	0	0	13	0	0	Bacteria	Proteobacteria	Alphaproteobacteria	Rickettsiales	Rickettsiaceae	Candidatus Megaira
>ASV_997	0	0	0	0	0	0	0	13	0	0	0	Bacteria	Marinimicrobia (SAR406 clade)
>ASV_999	0	0	0	0	0	0	0	0	0	0	0	Bacteria	Marinimicrobia (SAR406 clade)
>ASV_1000	0	0	13	0	0	0	0	0	0	0	0	Bacteria	Proteobacteria	Alphaproteobacteria	Rickettsiales	S25-593
>ASV_1001	0	0	13	0	0	0	0	0	0	0	0	Bacteria	Bacteroidetes	Bacteroidia	Chitinophagales	Saprospiraceae	Lewinella
>ASV_1002	2	1	0	0	0	0	0	5	0	3	0	Bacteria	Proteobacteria	Deltaproteobacteria	Bdellovibrionales	Bdellovibrionaceae	Bdellovibrio
>ASV_1004	0	12	0	0	0	0	0	0	0	0	0	Bacteria	Proteobacteria	Alphaproteobacteria	Rhodovibrionales	Kiloniellaceae	Pelagibius
>ASV_1005	0	12	0	0	0	0	0	0	0	0	0	Bacteria	Marinimicrobia (SAR406 clade)
>ASV_1007	0	12	0	0	0	0	0	0	0	0	0	Bacteria	Proteobacteria	Deltaproteobacteria	Bdellovibrionales	Bdellovibrionaceae	OM27 clade
>ASV_1009	0	12	0	0	0	0	0	0	0	0	0	Bacteria	Margulisbacteria
>ASV_1011	0	0	0	0	0	0	0	0	0	0	12	Bacteria	Proteobacteria	Gammaproteobacteria	Oceanospirillales	Nitrincolaceae	uncultured
>ASV_1012	0	0	0	0	0	0	0	0	0	0	12	Bacteria	Bacteroidetes	Bacteroidia	Flavobacteriales	Flavobacteriaceae	Psychroserpens
>ASV_1013	0	0	0	0	0	0	0	0	0	0	12	Bacteria	Proteobacteria	Gammaproteobacteria	Cellvibrionales	Spongiibacteraceae	BD1-7 clade
>ASV_1014	0	0	0	0	0	0	12	0	0	0	0	Bacteria	Bacteroidetes	Bacteroidia	Flavobacteriales	Flavobacteriaceae	NS5 marine group
>ASV_1015	0	0	0	0	0	0	12	0	0	0	0	Archaea	Euryarchaeota	Thermoplasmata	Marine Group II
>ASV_1016	0	0	0	5	7	0	0	0	0	0	0	Bacteria	Proteobacteria	Gammaproteobacteria	OM182 clade
>ASV_1017	4	0	8	0	0	0	0	0	0	0	0	Bacteria	Planctomycetes	OM190
>ASV_1019	0	0	12	0	0	0	0	0	0	0	0	Bacteria	Bacteroidetes	Bacteroidia	Chitinophagales	Saprospiraceae	uncultured
>ASV_1020	0	0	12	0	0	0	0	0	0	0	0	Bacteria	Proteobacteria	Deltaproteobacteria	Desulfuromonadales	Desulfuromonadaceae	Pelobacter
>ASV_1021	0	0	12	0	0	0	0	0	0	0	0	Bacteria	Bacteroidetes	Bacteroidia	Flavobacteriales	Flavobacteriaceae	Tenacibaculum
>ASV_1023	0	0	12	0	0	0	0	0	0	0	0	Bacteria	Proteobacteria	Alphaproteobacteria	uncultured
>ASV_1024	0	0	12	0	0	0	0	0	0	0	0	Bacteria	Marinimicrobia (SAR406 clade)
>ASV_1025	0	0	12	0	0	0	0	0	0	0	0	Bacteria	Proteobacteria	Gammaproteobacteria	Francisellales	Francisellaceae	uncultured
>ASV_1026	0	0	0	0	0	0	0	0	0	11	0	Bacteria	Proteobacteria	Alphaproteobacteria	Puniceispirillales	SAR116 clade
>ASV_1027	0	0	0	0	0	1	4	2	1	1	1	Bacteria	Bacteroidetes	Bacteroidia	Flavobacteriales	Flavobacteriaceae	Formosa
>ASV_1029	0	11	0	0	0	0	0	0	0	0	0	Bacteria	Proteobacteria	Deltaproteobacteria	Oligoflexales	Oligoflexaceae	uncultured
>ASV_1033	0	0	0	0	0	0	0	0	0	0	11	Bacteria	Bacteroidetes	Bacteroidia	Flavobacteriales	Cryomorphaceae	uncultured
>ASV_1035	0	0	0	0	0	0	0	0	0	0	11	Bacteria	Proteobacteria	Gammaproteobacteria	Alteromonadales	Colwelliaceae	Colwellia
>ASV_1036	0	0	0	0	0	0	0	0	0	0	11	Bacteria	Proteobacteria	Deltaproteobacteria	Bdellovibrionales	Bdellovibrionaceae	OM27 clade
>ASV_1037	0	0	0	11	0	0	0	0	0	0	0	Bacteria	Proteobacteria	Gammaproteobacteria	Betaproteobacteriales	Methylophilaceae	OM43 clade
>ASV_1039	0	0	0	11	0	0	0	0	0	0	0	Bacteria	Proteobacteria	Alphaproteobacteria	uncultured
>ASV_1042	0	0	0	0	0	0	0	11	0	0	0	Bacteria	Proteobacteria	Alphaproteobacteria	Rhodospirillales	AEGEAN-169 marine group
>ASV_1043	0	0	0	0	0	0	0	0	0	0	0	Bacteria	Proteobacteria	Alphaproteobacteria	Rhodospirillales	AEGEAN-169 marine group
>ASV_1045	0	0	11	0	0	0	0	0	0	0	0	Bacteria	Proteobacteria	Alphaproteobacteria	uncultured
>ASV_1046	0	0	11	0	0	0	0	0	0	0	0	Bacteria	Proteobacteria	Gammaproteobacteria	Ga0077536
>ASV_1047	0	0	11	0	0	0	0	0	0	0	0	Bacteria	Proteobacteria	Alphaproteobacteria	SAR11 clade	Clade II
>ASV_1048	0	0	11	0	0	0	0	0	0	0	0	Bacteria	Proteobacteria	Alphaproteobacteria	Rickettsiales	Rickettsiaceae	uncultured
>ASV_1051	0	10	0	0	0	0	0	0	0	0	0	Bacteria	Proteobacteria	Gammaproteobacteria	Coxiellales	Coxiellaceae	Coxiella
>ASV_1052	0	10	0	0	0	0	0	0	0	0	0	Bacteria	Proteobacteria	Gammaproteobacteria	Coxiellales	Coxiellaceae	Coxiella
>ASV_1057	0	0	0	10	0	0	0	0	0	0	0	Bacteria	Bacteroidetes	Bacteroidia	Flavobacteriales	Cryomorphaceae	NS10 marine group
>ASV_1058	0	0	0	10	0	0	0	0	0	0	0	Bacteria	Proteobacteria	Gammaproteobacteria	Coxiellales	Coxiellaceae	Coxiella
>ASV_1060	0	0	0	10	0	0	0	0	0	0	0	Bacteria	Kiritimatiellaeota	Kiritimatiellae	Kiritimatiellales	Kiritimatiellaceae	R76-B128
>ASV_1061	0	0	0	0	0	0	0	0	10	0	0	Bacteria	Proteobacteria	Gammaproteobacteria	Cellvibrionales	Porticoccaceae	C1-B045
>ASV_1062	0	0	0	0	0	10	0	0	0	0	0	Bacteria	Cyanobacteria	Oxyphotobacteria	Nostocales	Phormidiaceae	Trichodesmium IMS101
>ASV_1064	10	0	0	0	0	0	0	0	0	0	0	Bacteria	Bacteroidetes	Bacteroidia	Flavobacteriales	Flavobacteriaceae	NS5 marine group
>ASV_1068	0	0	0	0	0	0	0	0	0	9	0	Bacteria	Fusobacteria	Fusobacteriia	Fusobacteriales	Leptotrichiaceae	uncultured
>ASV_1069	0	0	0	0	0	0	0	0	0	9	0	Bacteria	Marinimicrobia (SAR406 clade)
>ASV_1070	0	4	0	0	0	0	0	2	0	1	1	Bacteria	Proteobacteria	Gammaproteobacteria	eub62A3
>ASV_1073	0	9	0	0	0	0	0	0	0	0	0	Bacteria	Bacteroidetes	Bacteroidia	Flavobacteriales	Cryomorphaceae	uncultured
>ASV_1075	0	7	0	2	0	0	0	0	0	0	0	Bacteria	Proteobacteria	Alphaproteobacteria	SAR11 clade	Clade I	uncultured
>ASV_1076	0	0	0	0	0	0	0	0	7	0	2	Bacteria	Bacteroidetes	Bacteroidia	Bacteroidales	Prevotellaceae	Prevotella 9
>ASV_1078	0	0	0	9	0	0	0	0	0	0	0	Bacteria	Planctomycetes	Phycisphaerae	Phycisphaerales	Phycisphaeraceae	CL500-3
>ASV_1079	0	0	0	9	0	0	0	0	0	0	0	Bacteria	Bacteroidetes	Bacteroidia	Flavobacteriales	NS9 marine group
>ASV_1080	0	0	0	9	0	0	0	0	0	0	0	Bacteria	Proteobacteria	Deltaproteobacteria	Myxococcales	P3OB-42
>ASV_1081	0	0	0	9	0	0	0	0	0	0	0	Bacteria	Proteobacteria	Alphaproteobacteria	uncultured
>ASV_1082	0	0	0	9	0	0	0	0	0	0	0	Bacteria	Proteobacteria	Gammaproteobacteria	Piscirickettsiales	Piscirickettsiaceae	Candidatus Endoecteinascidia
>ASV_1083	0	0	0	0	0	9	0	0	0	0	0	Bacteria	Proteobacteria	Alphaproteobacteria	Rickettsiales	Midichloriaceae	MD3-55
>ASV_1085	0	0	0	0	0	9	0	0	0	0	0	Bacteria	Bacteroidetes	Bacteroidia	Flavobacteriales	NS9 marine group
>ASV_1086	9	0	0	0	0	0	0	0	0	0	0	Bacteria	Proteobacteria	Gammaproteobacteria	Coxiellales	Coxiellaceae	Coxiella
>ASV_1088	9	0	0	0	0	0	0	0	0	0	0	Bacteria	Proteobacteria	Deltaproteobacteria	Bdellovibrionales	Bdellovibrionaceae	OM27 clade
>ASV_1089	9	0	0	0	0	0	0	0	0	0	0	Bacteria	Proteobacteria	Alphaproteobacteria	Rickettsiales	S25-593
>ASV_1091	0	0	0	0	9	0	0	0	0	0	0	Bacteria	Bacteroidetes	Bacteroidia	Flavobacteriales	Cryomorphaceae	NS10 marine group
>ASV_1093	0	0	0	0	0	0	0	9	0	0	0	Bacteria	Proteobacteria	Deltaproteobacteria	Bdellovibrionales	Bacteriovoracaceae	Peredibacter
>ASV_1094	0	0	9	0	0	0	0	0	0	0	0	Bacteria	Proteobacteria	Gammaproteobacteria	Alteromonadales	Alteromonadaceae	Aestuariibacter
>ASV_1095	0	0	9	0	0	0	0	0	0	0	0	Bacteria	Proteobacteria	Deltaproteobacteria	Bdellovibrionales	Bdellovibrionaceae	OM27 clade
>ASV_1097	0	0	9	0	0	0	0	0	0	0	0	Bacteria	Planctomycetes	Planctomycetacia	Pirellulales	Pirellulaceae	Blastopirellula
>ASV_1098	0	0	0	0	0	0	0	0	0	8	0	Bacteria	Proteobacteria	Alphaproteobacteria	Rhodospirillales	Magnetospiraceae	Magnetospira
>ASV_1099	0	0	0	0	0	0	0	0	0	8	0	Bacteria	Proteobacteria	Alphaproteobacteria	Sphingomonadales	Sphingomonadaceae	Sphingomonas
>ASV_1100	0	0	0	0	0	0	0	0	0	8	0	Bacteria	Proteobacteria	Alphaproteobacteria	SAR11 clade	Clade II
>ASV_1103	0	8	0	0	0	0	0	0	0	0	0	Bacteria	Proteobacteria	Alphaproteobacteria	SAR11 clade	Clade I	Clade Ib
>ASV_1105	0	0	0	0	0	0	0	0	0	0	8	Bacteria	Bacteroidetes	Bacteroidia	Cytophagales	Cyclobacteriaceae	Fulvivirga
>ASV_1106	0	0	0	0	0	0	0	0	0	0	8	Bacteria	Proteobacteria	Alphaproteobacteria	Rhodobacterales	Rhodobacteraceae	Octadecabacter
>ASV_1107	0	0	0	0	0	0	0	0	0	0	8	Bacteria	Bacteroidetes	Bacteroidia	Flavobacteriales	Crocinitomicaceae	Fluviicola
>ASV_1108	0	0	0	0	0	0	0	0	0	0	8	Bacteria	Verrucomicrobia	Verrucomicrobiae	Verrucomicrobiales	Rubritaleaceae	Rubritalea
>ASV_1109	0	0	0	0	0	0	8	0	0	0	0	Bacteria	Proteobacteria	Alphaproteobacteria	Rhodospirillales	AEGEAN-169 marine group
>ASV_1110	0	0	0	8	0	0	0	0	0	0	0	Bacteria	Planctomycetes	OM190
>ASV_1112	0	0	0	8	0	0	0	0	0	0	0	Bacteria	Proteobacteria	Deltaproteobacteria	Bdellovibrionales	Bdellovibrionaceae	OM27 clade
>ASV_1113	0	0	0	0	0	0	0	0	8	0	0	Bacteria	Proteobacteria	Alphaproteobacteria	Sphingomonadales	Sphingomonadaceae	Novosphingobium
>ASV_1116	0	0	0	0	0	8	0	0	0	0	0	Bacteria	Acidobacteria	Acidobacteriia	Acidobacteriales	uncultured
>ASV_1118	0	0	0	0	0	0	0	8	0	0	0	Bacteria	Proteobacteria	Gammaproteobacteria	Oceanospirillales	Litoricolaceae	Litoricola
>ASV_1120	0	0	0	0	0	0	0	8	0	0	0	Bacteria	Bacteroidetes	Bacteroidia	Flavobacteriales	Cryomorphaceae	uncultured
>ASV_1121	0	0	0	0	0	0	0	0	0	0	0	Bacteria	Verrucomicrobia	Verrucomicrobiae	Arctic97B-4 marine group
>ASV_1122	0	0	8	0	0	0	0	0	0	0	0	Bacteria	Bacteroidetes	Bacteroidia	Flavobacteriales	Crocinitomicaceae	Fluviicola
>ASV_1125	0	0	8	0	0	0	0	0	0	0	0	Bacteria	Planctomycetes	OM190
>ASV_1126	0	0	0	0	0	4	0	2	0	1	0	Bacteria	Bacteroidetes	Bacteroidia	Flavobacteriales	Crocinitomicaceae	Crocinitomix
>ASV_1127	0	7	0	0	0	0	0	0	0	0	0	Bacteria	Proteobacteria	Alphaproteobacteria	SAR11 clade	Clade I	Clade Ib
>ASV_1128	0	7	0	0	0	0	0	0	0	0	0	Bacteria	Proteobacteria	Deltaproteobacteria	Bdellovibrionales	Bacteriovoracaceae	Peredibacter
>ASV_1129	0	7	0	0	0	0	0	0	0	0	0	Bacteria	Proteobacteria	Gammaproteobacteria	Alteromonadales	Pseudoalteromonadaceae	Pseudoalteromonas
>ASV_1130	0	7	0	0	0	0	0	0	0	0	0	Bacteria	Proteobacteria	Alphaproteobacteria	uncultured
>ASV_1131	0	7	0	0	0	0	0	0	0	0	0	Bacteria	Proteobacteria	Alphaproteobacteria	Rhodospirillales	Magnetospiraceae	uncultured
>ASV_1132	0	7	0	0	0	0	0	0	0	0	0	Bacteria	Proteobacteria	Gammaproteobacteria	Piscirickettsiales	Piscirickettsiaceae	Candidatus Endoecteinascidia
>ASV_1134	0	7	0	0	0	0	0	0	0	0	0	Bacteria	Proteobacteria	Gammaproteobacteria	KI89A clade
>ASV_1141	0	0	0	7	0	0	0	0	0	0	0	Bacteria	Proteobacteria	Deltaproteobacteria	Bdellovibrionales	Bdellovibrionaceae	OM27 clade
>ASV_1142	0	0	0	7	0	0	0	0	0	0	0	Bacteria	Cyanobacteria	Oxyphotobacteria	Synechococcales	Cyanobiaceae	Synechococcus CC9902
>ASV_1143	0	0	0	7	0	0	0	0	0	0	0	Bacteria	Planctomycetes	Planctomycetacia	Pirellulales	Pirellulaceae	Blastopirellula
>ASV_1145	0	0	0	0	0	7	0	0	0	0	0	Bacteria	Proteobacteria	Gammaproteobacteria	Gammaproteobacteria Incertae Sedis	Unknown Family
>ASV_1146	0	0	0	0	0	7	0	0	0	0	0	Bacteria	Proteobacteria	Deltaproteobacteria	Bdellovibrionales	Bacteriovoracaceae	Peredibacter
>ASV_1147	7	0	0	0	0	0	0	0	0	0	0	Bacteria	Proteobacteria	Alphaproteobacteria	Rickettsiales	Rickettsiaceae	uncultured
>ASV_1148	0	0	0	0	7	0	0	0	0	0	0	Bacteria	Proteobacteria	Deltaproteobacteria	Bdellovibrionales	Bacteriovoracaceae	Peredibacter
>ASV_1149	0	0	0	0	7	0	0	0	0	0	0	Bacteria	Planctomycetes	Phycisphaerae	Phycisphaerales	Phycisphaeraceae	CL500-3
>ASV_1152	0	0	0	0	7	0	0	0	0	0	0	Bacteria	Proteobacteria	Deltaproteobacteria	Myxococcales	BIrii41
>ASV_1153	0	0	0	0	0	0	0	7	0	0	0	Bacteria	Cyanobacteria	Oxyphotobacteria	Synechococcales	Cyanobiaceae	Synechococcus CC9902
>ASV_1155	0	0	7	0	0	0	0	0	0	0	0	Bacteria	Verrucomicrobia	Verrucomicrobiae	Pedosphaerales	Pedosphaeraceae
>ASV_1156	0	0	7	0	0	0	0	0	0	0	0	Bacteria	Planctomycetes	OM190
>ASV_1157	0	0	7	0	0	0	0	0	0	0	0	Bacteria	Proteobacteria	Alphaproteobacteria	Rickettsiales	Anaplasmataceae	Wolbachia
>ASV_1158	0	0	7	0	0	0	0	0	0	0	0	Bacteria	Bacteroidetes	Bacteroidia	Flavobacteriales	Flavobacteriaceae	uncultured
>ASV_1159	0	0	7	0	0	0	0	0	0	0	0	Bacteria	Proteobacteria	Deltaproteobacteria	Bdellovibrionales	Bdellovibrionaceae	OM27 clade
>ASV_1160	0	0	7	0	0	0	0	0	0	0	0	Bacteria	Proteobacteria	Alphaproteobacteria	uncultured
>ASV_1161	0	0	7	0	0	0	0	0	0	0	0	Bacteria	Verrucomicrobia	Verrucomicrobiae	Opitutales	Puniceicoccaceae	MB11C04 marine group
>ASV_1166	0	6	0	0	0	0	0	0	0	0	0	Bacteria	Bacteroidetes	Bacteroidia	Chitinophagales	Saprospiraceae	Aureispira
>ASV_1167	0	6	0	0	0	0	0	0	0	0	0	Bacteria	Proteobacteria	Deltaproteobacteria	Bdellovibrionales	Bdellovibrionaceae	OM27 clade
>ASV_1171	0	0	0	0	0	0	0	0	0	0	6	Bacteria	Bacteroidetes	Bacteroidia	Flavobacteriales	NS9 marine group
>ASV_1172	0	0	0	0	0	0	0	0	0	0	6	Bacteria	Bacteroidetes	Bacteroidia	Flavobacteriales	Schleiferiaceae	Schleiferia
>ASV_1173	0	0	0	0	0	0	6	0	0	0	0	Bacteria	Proteobacteria	Gammaproteobacteria	Coxiellales	Coxiellaceae	Coxiella
>ASV_1174	0	0	0	0	4	0	2	0	0	0	0	Bacteria	Proteobacteria	Alphaproteobacteria	Rickettsiales	S25-593
>ASV_1177	0	0	0	0	0	0	0	0	6	0	0	Bacteria	Firmicutes	Clostridia	Clostridiales	Ruminococcaceae	Faecalibacterium
>ASV_1178	0	0	0	0	0	6	0	0	0	0	0	Bacteria	Bacteroidetes	Bacteroidia	Sphingobacteriales	NS11-12 marine group
>ASV_1179	0	0	0	0	0	6	0	0	0	0	0	Bacteria	Proteobacteria	Deltaproteobacteria	Bdellovibrionales	Bdellovibrionaceae	OM27 clade
>ASV_1180	0	0	0	0	0	6	0	0	0	0	0	Bacteria	Bacteroidetes	Bacteroidia	Flavobacteriales	Cryomorphaceae	uncultured
>ASV_1181	6	0	0	0	0	0	0	0	0	0	0	Bacteria	Bacteroidetes	Bacteroidia	Flavobacteriales	Cryomorphaceae	uncultured
>ASV_1182	6	0	0	0	0	0	0	0	0	0	0	Bacteria	Bacteroidetes	Bacteroidia	Chitinophagales	Saprospiraceae	uncultured
>ASV_1184	0	0	0	0	6	0	0	0	0	0	0	Bacteria	Verrucomicrobia	Verrucomicrobiae	Opitutales	Puniceicoccaceae	MB11C04 marine group
>ASV_1185	0	0	0	0	6	0	0	0	0	0	0	Bacteria	Bacteroidetes	Bacteroidia	Flavobacteriales	NS9 marine group
>ASV_1186	0	0	0	0	0	0	0	0	0	0	0	Bacteria	Proteobacteria	Gammaproteobacteria	Francisellales	Francisellaceae	Francisella
>ASV_1187	0	0	0	0	0	0	0	0	0	0	0	Bacteria	Bacteroidetes	Bacteroidia	Cytophagales	Cyclobacteriaceae	uncultured
>ASV_1188	0	0	0	0	0	0	0	0	0	0	0	Bacteria	Proteobacteria	Gammaproteobacteria	Alteromonadales	Colwelliaceae	Colwellia
>ASV_1190	0	0	6	0	0	0	0	0	0	0	0	Bacteria	Proteobacteria	Gammaproteobacteria	Vibrionales	Vibrionaceae	uncultured
>ASV_1191	0	0	6	0	0	0	0	0	0	0	0	Bacteria	Bacteroidetes	Bacteroidia	Chitinophagales	Saprospiraceae	Portibacter
>ASV_1192	0	0	6	0	0	0	0	0	0	0	0	Bacteria	Proteobacteria	Gammaproteobacteria	Betaproteobacteriales	Burkholderiaceae	MWH-UniP1 aquatic group
>ASV_1194	0	0	6	0	0	0	0	0	0	0	0	Bacteria	Proteobacteria	Deltaproteobacteria	Myxococcales	P3OB-42
>ASV_1198	0	5	0	0	0	0	0	0	0	0	0	Bacteria	Proteobacteria	Alphaproteobacteria	Rhodospirillales	Thalassospiraceae	Thalassospira
>ASV_1199	0	5	0	0	0	0	0	0	0	0	0	Bacteria	Proteobacteria	Gammaproteobacteria	Coxiellales	Coxiellaceae	Coxiella
>ASV_1202	0	5	0	0	0	0	0	0	0	0	0	Bacteria	Proteobacteria	Gammaproteobacteria	Thiomicrospirales	Thiomicrospiraceae	endosymbionts
>ASV_1205	0	0	0	0	0	0	0	0	0	0	5	Bacteria	Proteobacteria	Deltaproteobacteria	SAR324 clade(Marine group B)
>ASV_1206	0	0	0	0	0	0	0	0	0	0	5	Bacteria	Bacteroidetes	Bacteroidia	Flavobacteriales	Crocinitomicaceae	Fluviicola
>ASV_1207	0	0	0	0	0	0	0	0	0	0	5	Bacteria	Bacteroidetes	Bacteroidia	Flavobacteriales	Crocinitomicaceae	Fluviicola
>ASV_1208	0	0	0	0	0	0	5	0	0	0	0	Bacteria	Proteobacteria	Gammaproteobacteria	Cellvibrionales	Spongiibacteraceae	BD1-7 clade
>ASV_1209	0	0	0	5	0	0	0	0	0	0	0	Bacteria	Cyanobacteria	Oxyphotobacteria	Nostocales	Xenococcaceae
>ASV_1211	0	0	0	5	0	0	0	0	0	0	0	Bacteria	Bacteroidetes	Bacteroidia	Cytophagales	Cyclobacteriaceae	Marinoscillum
>ASV_1212	0	0	0	5	0	0	0	0	0	0	0	Bacteria	Planctomycetes	OM190
>ASV_1214	0	0	0	5	0	0	0	0	0	0	0	Bacteria	Bacteroidetes	Bacteroidia	Chitinophagales	Saprospiraceae	Aureispira
>ASV_1216	0	0	0	5	0	0	0	0	0	0	0	Bacteria	Proteobacteria	Alphaproteobacteria	Rhodobacterales	Rhodobacteraceae	uncultured
>ASV_1219	0	0	0	0	0	0	0	0	5	0	0	Bacteria	Bacteroidetes	Bacteroidia	Bacteroidales	Dysgonomonadaceae	Proteiniphilum
>ASV_1220	0	0	0	0	0	0	0	0	5	0	0	Bacteria	Bacteroidetes	Bacteroidia	Flavobacteriales	Crocinitomicaceae	Crocinitomix
>ASV_1221	0	0	0	0	0	0	0	0	5	0	0	Bacteria	Firmicutes	Bacilli	Bacillales	Staphylococcaceae	Staphylococcus
>ASV_1222	0	0	0	0	0	0	0	0	5	0	0	Bacteria	Proteobacteria	Alphaproteobacteria	Rhodobacterales	Rhodobacteraceae	Xuhuaishuia
>ASV_1224	0	0	0	0	0	5	0	0	0	0	0	Bacteria	Bacteroidetes	Bacteroidia	Flavobacteriales	Crocinitomicaceae	Crocinitomix
>ASV_1225	5	0	0	0	0	0	0	0	0	0	0	Bacteria	Bacteroidetes	Bacteroidia	Flavobacteriales	Flavobacteriaceae	NS5 marine group
>ASV_1227	5	0	0	0	0	0	0	0	0	0	0	Bacteria	Proteobacteria	Deltaproteobacteria	Bdellovibrionales	Bdellovibrionaceae	OM27 clade
>ASV_1229	0	0	0	0	5	0	0	0	0	0	0	Bacteria	Verrucomicrobia	Verrucomicrobiae	Verrucomicrobiales	Rubritaleaceae	Rubritalea
>ASV_1230	0	0	0	0	5	0	0	0	0	0	0	Bacteria	Proteobacteria	Gammaproteobacteria	Coxiellales	Coxiellaceae	Coxiella
>ASV_1232	0	0	0	0	0	0	0	5	0	0	0	Bacteria	Proteobacteria	Alphaproteobacteria	Rhodospirillales	Magnetospiraceae	uncultured
>ASV_1234	0	0	5	0	0	0	0	0	0	0	0	Bacteria	Bacteroidetes	Bacteroidia	Flavobacteriales	Flavobacteriaceae	NS4 marine group
>ASV_1235	0	0	5	0	0	0	0	0	0	0	0	Bacteria	Verrucomicrobia	Verrucomicrobiae	Verrucomicrobiales	Rubritaleaceae	Roseibacillus
>ASV_1236	0	0	5	0	0	0	0	0	0	0	0	Bacteria	Bacteroidetes	Bacteroidia	Chitinophagales	uncultured
>ASV_1237	0	0	5	0	0	0	0	0	0	0	0	Bacteria	Bacteroidetes	Bacteroidia	Chitinophagales	Saprospiraceae	Aureispira
>ASV_1238	0	0	5	0	0	0	0	0	0	0	0	Bacteria	Bacteroidetes	Bacteroidia	Flavobacteriales	Flavobacteriaceae	NS4 marine group
>ASV_1239	0	0	5	0	0	0	0	0	0	0	0	Bacteria	Planctomycetes	Phycisphaerae	Phycisphaerales	Phycisphaeraceae	SM1A02
>ASV_1241	0	0	5	0	0	0	0	0	0	0	0	Bacteria	Proteobacteria	Deltaproteobacteria	Bdellovibrionales	Bdellovibrionaceae	Bdellovibrio
>ASV_1243	0	0	0	0	0	0	0	0	0	4	0	Bacteria	Planctomycetes	Phycisphaerae	Phycisphaerales	Phycisphaeraceae	SM1A02
>ASV_1244	0	4	0	0	0	0	0	0	0	0	0	Bacteria	Proteobacteria	Alphaproteobacteria	Rickettsiales	Rickettsiaceae	Candidatus Cryptoprodotis
>ASV_1246	0	4	0	0	0	0	0	0	0	0	0	Bacteria	Proteobacteria	Magnetococcia	Magnetococcales	Magnetococcaceae	Magnetococcus
>ASV_1248	0	4	0	0	0	0	0	0	0	0	0	Bacteria	Bacteroidetes	Bacteroidia	Chitinophagales	Saprospiraceae	Aureispira
>ASV_1249	0	0	0	0	0	0	0	0	0	0	4	Bacteria	Proteobacteria	Gammaproteobacteria	Gammaproteobacteria Incertae Sedis	Unknown Family	Marinicella
>ASV_1250	0	0	0	0	0	0	0	0	0	0	4	Bacteria	Bacteroidetes	Bacteroidia	Cytophagales	Cyclobacteriaceae	Fulvivirga
>ASV_1254	0	0	0	4	0	0	0	0	0	0	0	Bacteria	Proteobacteria	Alphaproteobacteria	Rickettsiales	Rickettsiaceae	Candidatus Cryptoprodotis
>ASV_1255	0	0	0	4	0	0	0	0	0	0	0	Bacteria	Marinimicrobia (SAR406 clade)
>ASV_1256	0	0	0	0	0	4	0	0	0	0	0	Bacteria	Bacteroidetes	Bacteroidia	Chitinophagales	Saprospiraceae	Aureispira
>ASV_1257	0	0	0	0	0	4	0	0	0	0	0	Bacteria	Verrucomicrobia	Verrucomicrobiae	Verrucomicrobiales	DEV007
>ASV_1259	0	0	0	0	0	4	0	0	0	0	0	Bacteria	Proteobacteria	Gammaproteobacteria	Diplorickettsiales	Diplorickettsiaceae	uncultured
>ASV_1260	0	0	0	0	0	4	0	0	0	0	0	Bacteria	Proteobacteria	Deltaproteobacteria	SAR324 clade(Marine group B)
>ASV_1263	0	0	0	0	4	0	0	0	0	0	0	Bacteria	Proteobacteria	Deltaproteobacteria	Bdellovibrionales	Bdellovibrionaceae	OM27 clade
>ASV_1264	0	0	0	0	4	0	0	0	0	0	0	Bacteria	Proteobacteria	Gammaproteobacteria	Gammaproteobacteria Incertae Sedis	Unknown Family
>ASV_1265	0	0	0	0	0	0	0	4	0	0	0	Bacteria	Bacteroidetes	Rhodothermia	Rhodothermales	Rhodothermaceae	uncultured
>ASV_1266	0	0	0	0	0	0	0	0	0	0	0	Bacteria	Bacteroidetes	Bacteroidia	Flavobacteriales	Crocinitomicaceae	Crocinitomix
>ASV_1267	0	0	4	0	0	0	0	0	0	0	0	Bacteria	Proteobacteria	Deltaproteobacteria	Bdellovibrionales	Bdellovibrionaceae	OM27 clade
>ASV_1268	0	0	4	0	0	0	0	0	0	0	0	Bacteria	Proteobacteria	Gammaproteobacteria	Ectothiorhodospirales	Ectothiorhodospiraceae	uncultured
>ASV_1269	0	0	4	0	0	0	0	0	0	0	0	Bacteria	Bacteroidetes	Bacteroidia	Bacteroidales	Bacteroidaceae	Bacteroides
>ASV_1273	0	0	4	0	0	0	0	0	0	0	0	Bacteria	Proteobacteria	Deltaproteobacteria	Bdellovibrionales	Bacteriovoracaceae	uncultured
>ASV_1274	0	0	4	0	0	0	0	0	0	0	0	Bacteria	Proteobacteria	Gammaproteobacteria	Ectothiorhodospirales	Ectothiorhodospiraceae	Ectothiorhodosinus
>ASV_1277	0	3	0	0	0	0	0	0	0	0	0	Bacteria	Verrucomicrobia	Verrucomicrobiae	Verrucomicrobiales	Rubritaleaceae	Rubritalea
>ASV_1279	0	0	0	0	0	0	3	0	0	0	0	Bacteria	Proteobacteria	Alphaproteobacteria	Rickettsiales	Anaplasmataceae	uncultured
>ASV_1280	0	0	0	0	0	0	3	0	0	0	0	Bacteria	Proteobacteria	Alphaproteobacteria	Rickettsiales	Midichloriaceae	MD3-55
>ASV_1282	0	0	0	0	0	0	3	0	0	0	0	Bacteria	Verrucomicrobia	Verrucomicrobiae	Opitutales	Puniceicoccaceae	MB11C04 marine group
>ASV_1283	0	0	0	0	0	0	3	0	0	0	0	Bacteria	Proteobacteria	Deltaproteobacteria	Bdellovibrionales	Bdellovibrionaceae	OM27 clade
>ASV_1285	0	0	0	3	0	0	0	0	0	0	0	Bacteria	Proteobacteria	Deltaproteobacteria	Bdellovibrionales	Bdellovibrionaceae	OM27 clade
>ASV_1287	0	0	0	0	0	0	0	0	3	0	0	Bacteria	Proteobacteria	Deltaproteobacteria	Bdellovibrionales	Bdellovibrionaceae	OM27 clade
>ASV_1288	0	0	0	0	0	0	0	0	3	0	0	Bacteria	Proteobacteria	Deltaproteobacteria	SAR324 clade(Marine group B)
>ASV_1289	0	0	0	0	0	0	0	0	3	0	0	Archaea	Thaumarchaeota	Nitrososphaeria	Nitrosopumilales	Nitrosopumilaceae	Candidatus Nitrosopumilus
>ASV_1290	0	0	0	0	0	0	0	0	3	0	0	Bacteria	Bacteroidetes	Bacteroidia	Cytophagales	Cyclobacteriaceae	uncultured
>ASV_1291	0	0	0	0	0	3	0	0	0	0	0	Bacteria	Proteobacteria	Gammaproteobacteria	Coxiellales	Coxiellaceae	Coxiella
>ASV_1293	0	0	0	0	0	3	0	0	0	0	0	Bacteria	Bacteroidetes	Bacteroidia	Flavobacteriales	Flavobacteriaceae	Flavicella
>ASV_1294	3	0	0	0	0	0	0	0	0	0	0	Bacteria	Proteobacteria	Alphaproteobacteria	uncultured
>ASV_1297	0	0	0	0	0	0	0	0	0	0	0	Bacteria	Proteobacteria	Deltaproteobacteria	Bdellovibrionales	Bacteriovoracaceae
>ASV_1299	0	0	0	0	0	0	0	0	0	0	0	Bacteria	Proteobacteria	Alphaproteobacteria	Rhodospirillales	AEGEAN-169 marine group
>ASV_1300	0	0	3	0	0	0	0	0	0	0	0	Bacteria	Proteobacteria	Alphaproteobacteria	SAR11 clade	Clade I	Clade Ia
>ASV_1302	0	0	3	0	0	0	0	0	0	0	0	Bacteria	Proteobacteria	Gammaproteobacteria	Francisellales	Francisellaceae	uncultured
>ASV_1305	0	2	0	0	0	0	0	0	0	0	0	Bacteria	Planctomycetes	OM190
>ASV_1306	0	2	0	0	0	0	0	0	0	0	0	Bacteria	Bacteroidetes	Bacteroidia	Flavobacteriales	Cryomorphaceae	uncultured
>ASV_1307	0	2	0	0	0	0	0	0	0	0	0	Bacteria	Proteobacteria	Alphaproteobacteria	Micavibrionales	Micavibrionaceae	uncultured
>ASV_1310	0	0	0	0	0	0	0	0	0	0	2	Bacteria	Nitrospinae	Nitrospinia	Nitrospinales	Nitrospinaceae	LS-NOB
>ASV_1312	0	0	0	0	0	0	2	0	0	0	0	Bacteria	Proteobacteria	Deltaproteobacteria	Bdellovibrionales	Bdellovibrionaceae	OM27 clade
>ASV_1316	0	0	0	2	0	0	0	0	0	0	0	Bacteria	Proteobacteria	Alphaproteobacteria	Rickettsiales	Midichloriaceae	MD3-55
>ASV_1319	0	0	0	0	0	0	0	0	2	0	0	Archaea	Nanoarchaeaeota	Woesearchaeia
>ASV_1322	0	0	0	0	0	2	0	0	0	0	0	Bacteria	Bacteroidetes	Bacteroidia	Cytophagales	Cyclobacteriaceae	Fulvivirga
>ASV_1328	0	0	0	0	2	0	0	0	0	0	0	Bacteria	Proteobacteria	Gammaproteobacteria	Ectothiorhodospirales	Ectothiorhodospiraceae	uncultured
>ASV_1331	0	0	2	0	0	0	0	0	0	0	0	Bacteria	Omnitrophicaeota
>ASV_1333	0	0	2	0	0	0	0	0	0	0	0	Bacteria	Proteobacteria	Alphaproteobacteria	Micavibrionales	uncultured
>ASV_1336	0	0	0	0	0	0	0	0	0	0	1	Bacteria	Bacteroidetes	Bacteroidia	Flavobacteriales	Flavobacteriaceae	Formosa
>ASV_1338	0	0	0	0	0	1	0	0	0	0	0	Bacteria	Proteobacteria	Alphaproteobacteria	SAR11 clade	Clade I	Clade Ia
