# Supplementary material for: Hydrographic fronts shape productivity, nitrogen fixation, and microbial community composition in the South Indian Ocean and the Southern Ocean
Source: Copernicus journal article supplement (doi:10.5194/bg-2021-52), 2021-03-15
Supplement: Supplementary file 1 [file bg-2021-52-supplement.zip › Supplementary/Table S5.csv]

ASV	OISO2	OISO3	OISO16	OISO18	OISO4	OISO15	OISO6	OISO7	OISO9	OISO37	OISO11	OISOE	Confidence	Taxon	clade	kingdom	phylum	genus	class	family	species
ASV_2	0	37	5	0	87	413	1544	5121	2923	666	450	16784	0.997555625	Eukaryota	Alveolata	Dinoflagellata	Dinophyceae	Dinophyceae_X	Dinophyceae_XX	Dinophyceae_XXX	Dinophyceae_XXX_sp.
ASV_5	4	28	127	15	5563	3833	1957	4150	4498	0	2	12	0.999999685	Eukaryota	Archaeplastida	Chlorophyta	Palmophyllophyceae	Prasinococcales	Prasinococcales-Clade-B	Prasinoderma	Prasinoderma_singularis
ASV_6	842	1805	1393	392	2602	1840	1518	3868	784	313	406	1042	0.784256747	Eukaryota	Alveolata	Dinoflagellata	Dinophyceae	Dinophyceae_X	Dinophyceae_XX	Dinophyceae_XXX	Dinophyceae_XXX_sp.
ASV_7	0	10	0	9	4	0	32	28	14	69	318	16178	0.978373879	Eukaryota	Alveolata	Dinoflagellata	Dinophyceae	Dinophyceae_X	Dinophyceae_XX	Dinophyceae_XXX	Dinophyceae_XXX_sp.
ASV_8	42	692	46	15	14	750	3383	821	2432	131	1324	3921	0.888178731	Eukaryota	Hacrobia	Haptophyta	Prymnesiophyceae	Isochrysidales	Noelaerhabdaceae	Gephyrocapsa	Gephyrocapsa_muellerae
ASV_9	4	62	0	6	74	558	380	191	142	265	386	10498	0.999999086	Eukaryota	Stramenopiles	Ochrophyta	Bacillariophyta	Bacillariophyta_X	Polar-centric-Mediophyceae
ASV_10	0	55	0	0	11	0	349	2707	3292	113	2696	2173	0.999466668	Eukaryota	Hacrobia	Haptophyta	Prymnesiophyceae	Phaeocystales	Phaeocystaceae	Phaeocystis	Phaeocystis_rex
ASV_11	460	424	55	949	1563	5909	57	0	20	0	0	0	0.999999736	Eukaryota	Alveolata	Dinoflagellata	Syndiniales	Dino-Group-I	Dino-Group-I-Clade-1	Dino-Group-I-Clade-1_X	Dino-Group-I-Clade-1_X_sp.
ASV_13	740	809	176	377	4851	1473	79	54	143	0	0	18	0.893994365	Eukaryota	Alveolata	Dinoflagellata	Dinophyceae	Dinophyceae_X	Dinophyceae_XX	Dinophyceae_XXX	Dinophyceae_XXX_sp.
ASV_14	2347	3125	1478	1303	25	306	0	0	0	77	22	6	0.996564744	Eukaryota	Alveolata	Dinoflagellata	Dinophyceae	Dinophyceae_X	Dinophyceae_XX	Dinophyceae_XXX	Dinophyceae_XXX_sp.
ASV_15	6	88	1	0	134	187	458	1677	1038	1513	2640	38	0.999863983	Eukaryota	Stramenopiles	Ochrophyta	Bacillariophyta	Bacillariophyta_X	Raphid-pennate
ASV_16	21	67	0	119	3501	349	725	719	2005	91	63	8	0.745727806	Eukaryota	Alveolata	Dinoflagellata	Dinophyceae	Suessiales	Suessiales_X	Suessiales_XX	Suessiales_XX_sp.
ASV_18	0	9	2	0	175	94	1494	1038	2426	276	302	28	0.999965339	Eukaryota	Stramenopiles	Ochrophyta	Bacillariophyta	Bacillariophyta_X	Raphid-pennate
ASV_19	118	267	74	37	9	107	89	1430	2142	153	625	255	0.999987004	Eukaryota	Alveolata	Dinoflagellata	Syndiniales	Dino-Group-I	Dino-Group-I-Clade-1	Dino-Group-I-Clade-1_X	Dino-Group-I-Clade-1_X_sp.
ASV_22	724	1266	719	910	613	994	0	0	0	0	0	5	0.936105778	Eukaryota	Alveolata	Dinoflagellata	Dinophyceae	Dinophyceae_X	Dinophyceae_XX	Dinophyceae_XXX	Dinophyceae_XXX_sp.
ASV_23	0	50	4	4	4569	493	17	27	16	0	0	0	0.989162876	Eukaryota	Archaeplastida	Chlorophyta	Chloropicophyceae	Chloropicales	Chloropicaceae	Chloroparvula	Chloroparvula_pacifica
ASV_24	10	236	68	0	269	893	1416	771	1294	6	15	75	0.99999936	Eukaryota	Alveolata	Dinoflagellata	Syndiniales	Dino-Group-I	Dino-Group-I-Clade-4	Dino-Group-I-Clade-4_X	Dino-Group-I-Clade-4_X_sp.
ASV_25	0	0	0	0	0	0	2360	1118	1008	41	66	55	0.999761943	Eukaryota	Stramenopiles	Ochrophyta	Bacillariophyta	Bacillariophyta_X	Radial-centric-basal-Coscinodiscophyceae	Actinocyclus	Actinocyclus_curvatulus
ASV_26	0	0	23	0	0	7	438	2688	657	11	124	413	0.999439368	Eukaryota	Hacrobia	Haptophyta	Prymnesiophyceae	Phaeocystales	Phaeocystaceae	Phaeocystis	Phaeocystis_rex
ASV_27	154	515	77	1254	4	26	433	1037	486	37	204	10	0.999806378	Eukaryota	Alveolata	Dinoflagellata	Syndiniales	Dino-Group-II	Dino-Group-II-Clade-10-and-11	Dino-Group-II-Clade-10-and-11_X	Dino-Group-II-Clade-10-and-11_X_sp.
ASV_28	134	37	0	67	2169	1338	177	104	427	49	0	7	0.949539457	Eukaryota	Alveolata	Dinoflagellata	Dinophyceae	Dinophyceae_X	Dinophyceae_XX	Dinophyceae_XXX	Dinophyceae_XXX_sp.
ASV_29	509	3679	311	3	14	0	0	0	0	0	0	0	1	Eukaryota	Alveolata	Dinoflagellata	Syndiniales	Dino-Group-II	Dino-Group-II-Clade-16	Dino-Group-II-Clade-16_X	Dino-Group-II-Clade-16_X_sp.
ASV_31	0	20	0	0	0	0	478	343	1684	373	620	183	0.802380733	Eukaryota	Stramenopiles	Ochrophyta	Bacillariophyta	Bacillariophyta_X	Raphid-pennate	Fragilariopsis
ASV_32	2672	1067	0	6	18	0	0	0	0	0	0	1	0.999998019	Eukaryota	Hacrobia	Haptophyta	Prymnesiophyceae
ASV_33	0	0	0	0	0	0	301	324	2136	5	67	69	0.999999986	Eukaryota	Stramenopiles	Ochrophyta	Bacillariophyta	Bacillariophyta_X	Polar-centric-Mediophyceae	Chaetoceros
ASV_34	2	8	0	0	1	0	1056	868	1299	77	64	3	0.771562486	Eukaryota	Stramenopiles	Ochrophyta	Bacillariophyta	Bacillariophyta_X	Raphid-pennate	Fragilariopsis
ASV_35	0	11	1	2	1	0	114	244	844	14	230	2009	0.857752319	Eukaryota	Hacrobia	Telonemia	Telonemia_X	Telonemia_XX	Telonemia-Group-1	Telonema-Group-1	Telonema_sp.
ASV_36	2250	991	0	230	0	17	0	0	0	0	0	0	0.990322864	Eukaryota	Alveolata	Dinoflagellata	Dinophyceae	Dinophyceae_X	Dinophyceae_XX	Dinophyceae_XXX	Dinophyceae_XXX_sp.
ASV_38	451	933	423	315	3	19	50	226	606	40	203	0	0.999900097	Eukaryota	Alveolata	Dinoflagellata	Syndiniales	Dino-Group-II	Dino-Group-II-Clade-10-and-11	Dino-Group-II-Clade-10-and-11_X	Dino-Group-II-Clade-10-and-11_X_sp.
ASV_39	0	285	414	189	16	118	8	973	245	10	137	434	0.999999735	Eukaryota	Alveolata	Dinoflagellata	Dinophyceae	Gonyaulacales	Ceratiaceae	Tripos
ASV_40	0	0	0	0	0	0	5	63	21	23	13	3050	0.934437219	Eukaryota	Stramenopiles	Ochrophyta	Bacillariophyta	Bacillariophyta_X	Raphid-pennate
ASV_41	32	3049	28	19	2	17	0	0	0	0	0	5	0.995806941	Eukaryota	Alveolata	Dinoflagellata	Dinophyceae	Dinophyceae_X	Dinophyceae_XX	Dinophyceae_XXX	Dinophyceae_XXX_sp.
ASV_42	237	2363	384	9	0	4	0	0	0	0	1	5	0.990351085	Eukaryota	Alveolata	Dinoflagellata	Dinophyceae	Dinophyceae_X	Dinophyceae_XX	Dinophyceae_XXX	Dinophyceae_XXX_sp.
ASV_43	0	978	299	0	0	15	112	165	1090	15	192	0	0.999961702	Eukaryota	Stramenopiles	Ochrophyta	Pelagophyceae	Pelagomonadales	Pelagomonadaceae	Pelagomonas	Pelagomonas_calceolata
ASV_44	499	1015	393	258	2	42	36	369	206	5	25	62	0.967339958	Eukaryota	Alveolata	Dinoflagellata	Dinophyceae	Dinophyceae_X	Dinophyceae_XX	Dinophyceae_XXX	Dinophyceae_XXX_sp.
ASV_45	42	5	0	4	2	1	99	1015	536	39	199	770	0.998764432	Eukaryota	Alveolata	Dinoflagellata	Dinophyceae	Dinophyceae_X	Dinophyceae_XX	Dinophyceae_XXX	Dinophyceae_XXX_sp.
ASV_46	310	1395	46	93	337	233	96	29	22	20	9	164	0.972840442	Eukaryota	Alveolata	Dinoflagellata	Dinophyceae	Dinophyceae_X	Dinophyceae_XX	Dinophyceae_XXX	Dinophyceae_XXX_sp.
ASV_47	0	28	0	3	4	0	155	39	204	536	887	468	0.999034944	Eukaryota	Stramenopiles	Ochrophyta	Bacillariophyta	Bacillariophyta_X	Radial-centric-basal-Coscinodiscophyceae	Actinocyclus	Actinocyclus_curvatulus
ASV_48	235	134	361	140	1256	449	0	0	0	0	0	0	0.999999992	Eukaryota	Alveolata	Dinoflagellata	Dinophyceae	Gonyaulacales	Gonyaulacaceae	Gonyaulax
ASV_49	463	199	1712	6	0	109	0	0	0	0	0	0	0.999999564	Eukaryota	Alveolata	Dinoflagellata	Dinophyceae	Gonyaulacales	Ceratiaceae	Tripos
ASV_50	383	956	0	144	612	347	0	0	0	0	0	0	0.992871041	Eukaryota	Alveolata	Dinoflagellata	Dinophyceae	Dinophyceae_X	Dinophyceae_XX	Dinophyceae_XXX	Dinophyceae_XXX_sp.
ASV_51	0	15	1	18	0	0	204	770	450	42	428	397	0.999237234	Eukaryota	Alveolata	Dinoflagellata	Dinophyceae	Dinophyceae_X	Dinophyceae_XX	Dinophyceae_XXX	Dinophyceae_XXX_sp.
ASV_52	0	22	24	69	11	0	568	418	811	88	62	0	0.99999286	Eukaryota	Alveolata	Dinoflagellata	Syndiniales	Dino-Group-I	Dino-Group-I-Clade-1	Dino-Group-I-Clade-1_X	Dino-Group-I-Clade-1_X_sp.
ASV_53	48	62	26	104	411	1729	0	0	0	0	0	0	0.999995228	Eukaryota	Alveolata	Dinoflagellata	Syndiniales	Dino-Group-I	Dino-Group-I-Clade-1	Dino-Group-I-Clade-1_X	Dino-Group-I-Clade-1_X_sp.
ASV_54	463	1191	16	387	41	115	25	18	0	7	96	0	0.949735518	Eukaryota	Alveolata	Dinoflagellata	Dinophyceae	Dinophyceae_X	Dinophyceae_XX	Dinophyceae_XXX	Dinophyceae_XXX_sp.
ASV_55	169	583	36	169	226	897	91	48	52	5	0	0	0.898330378	Eukaryota	Alveolata	Dinoflagellata	Dinophyceae	Dinophyceae_X	Dinophyceae_XX	Dinophyceae_XXX	Dinophyceae_XXX_sp.
ASV_56	3	26	0	0	10	16	140	438	316	416	761	10	0.999881294	Eukaryota	Stramenopiles	Ochrophyta	Bacillariophyta	Bacillariophyta_X	Raphid-pennate
ASV_57	118	272	83	534	33	330	133	71	151	16	22	87	0.99113716	Eukaryota	Alveolata	Dinoflagellata	Dinophyceae	Dinophyceae_X	Dinophyceae_XX	Dinophyceae_XXX	Dinophyceae_XXX_sp.
ASV_59	181	1599	134	196	0	13	0	38	15	0	0	3	0.998565043	Eukaryota	Hacrobia	Haptophyta	Prymnesiophyceae	Prymnesiales	Chrysochromulinaceae	Chrysochromulina
ASV_60	1794	140	109	0	11	0	0	0	0	0	0	0	1	Eukaryota
ASV_62	400	342	149	511	70	280	22	49	45	4	20	68	0.972424939	Eukaryota	Alveolata	Dinoflagellata	Dinophyceae	Dinophyceae_X	Dinophyceae_XX	Dinophyceae_XXX	Dinophyceae_XXX_sp.
ASV_63	0	17	0	0	0	0	12	295	1101	14	424	48	0.995970841	Eukaryota	Stramenopiles	Ochrophyta	Bacillariophyta	Bacillariophyta_X	Bacillariophyta_XX	Bacillariophyta_XXX	Bacillariophyta_XXX_sp.
ASV_64	656	716	208	331	5	16	0	0	0	0	0	0	0.999882258	Eukaryota	Alveolata	Dinoflagellata	Dinophyceae	Gymnodiniales	Gymnodiniaceae	Gyrodinium	Gyrodinium_dominans
ASV_66	0	3	0	0	133	74	469	704	393	0	0	4	0.703730647	Eukaryota	Stramenopiles	Ochrophyta	Bacillariophyta	Bacillariophyta_X	Polar-centric-Mediophyceae
ASV_67	0	0	0	0	0	0	236	30	254	48	26	1117	0.793475687	Eukaryota	Stramenopiles	Ochrophyta	Bacillariophyta	Bacillariophyta_X	Raphid-pennate	Pseudo-nitzschia	Pseudo-nitzschia_cf_cuspidata
ASV_68	1595	117	0	5	14	5	0	0	0	0	0	0	0.999857801	Eukaryota	Alveolata	Dinoflagellata	Syndiniales	Dino-Group-II	Dino-Group-II-Clade-10-and-11	Dino-Group-II-Clade-10-and-11_X	Dino-Group-II-Clade-10-and-11_X_sp.
ASV_69	0	0	0	0	0	0	0	0	0	0	0	1713	0.806212146	Eukaryota	Stramenopiles	Ochrophyta	Bacillariophyta	Bacillariophyta_X	Polar-centric-Mediophyceae	Eucampia	Eucampia_antarctica
ASV_70	273	486	715	170	5	14	14	3	7	0	3	9	1	Eukaryota	Alveolata	Dinoflagellata	Dinophyceae
ASV_71	164	286	146	64	42	857	27	27	36	0	0	0	0.99998477	Eukaryota	Alveolata	Dinoflagellata	Syndiniales	Dino-Group-I	Dino-Group-I-Clade-1	Dino-Group-I-Clade-1_X	Dino-Group-I-Clade-1_X_sp.
ASV_72	0	2	0	0	0	0	950	19	183	1	38	354	0.999996148	Eukaryota	Stramenopiles	Ochrophyta	Bacillariophyta	Bacillariophyta_X	Polar-centric-Mediophyceae
ASV_73	0	0	0	0	0	0	0	0	0	1637	0	0	0.999999977	Eukaryota	Alveolata	Ciliophora	Phyllopharyngea	Suctoria	Suctoria_X	Suctoria_XX	Suctoria_XX_sp.
ASV_74	0	12	0	0	0	4	771	203	496	9	0	0	0.999200685	Eukaryota	Stramenopiles	Ochrophyta	Bacillariophyta	Bacillariophyta_X	Raphid-pennate
ASV_75	22	340	125	46	685	258	0	0	0	74	0	35	0.947007715	Eukaryota	Alveolata	Dinoflagellata	Dinophyceae	Dinophyceae_X	Dinophyceae_XX	Dinophyceae_XXX	Dinophyceae_XXX_sp.
ASV_76	42	24	37	61	925	444	5	0	0	0	0	0	0.94179628	Eukaryota	Alveolata	Dinoflagellata	Dinophyceae	Dinophyceae_X	Dinophyceae_XX	Dinophyceae_XXX	Dinophyceae_XXX_sp.
ASV_78	0	0	0	0	0	0	216	302	805	8	42	97	1	Eukaryota
ASV_79	0	0	3	0	0	0	58	73	395	0	54	716	0.999999996	Eukaryota	Stramenopiles	Ochrophyta	Bacillariophyta	Bacillariophyta_X	Polar-centric-Mediophyceae	Chaetoceros
ASV_80	513	450	59	356	0	46	0	0	0	12	0	9	0.982337114	Eukaryota	Alveolata	Dinoflagellata	Dinophyceae	Dinophyceae_X	Dinophyceae_XX	Dinophyceae_XXX	Dinophyceae_XXX_sp.
ASV_82	1379	0	0	0	0	0	0	0	0	0	0	0	0.999028525	Eukaryota	Alveolata	Dinoflagellata	Dinophyceae	Dinophyceae_X	Dinophyceae_XX	Dinophyceae_XXX	Dinophyceae_XXX_sp.
ASV_83	0	0	0	0	182	0	0	0	0	179	0	855	0.843048679	Eukaryota	Alveolata	Dinoflagellata	Dinophyceae	Gymnodiniales	Chytriodiniaceae	Dissodinium	Dissodinium_pseudolunula
ASV_84	0	7	0	0	0	0	163	311	89	115	326	194	0.956597905	Eukaryota	Alveolata	Dinoflagellata	Dinophyceae	Dinophyceae_X	Dinophyceae_XX	Dinophyceae_XXX	Dinophyceae_XXX_sp.
ASV_85	799	429	0	28	7	0	14	15	5	3	4	34	0.942882879	Eukaryota	Alveolata	Dinoflagellata	Dinophyceae	Dinophyceae_X	Dinophyceae_XX	Dinophyceae_XXX	Dinophyceae_XXX_sp.
ASV_86	4	2	1	0	2	671	226	81	185	4	16	1	0.9379569	Eukaryota	Stramenopiles	Ochrophyta	Bacillariophyta	Bacillariophyta_X	Raphid-pennate	Pseudo-nitzschia	Pseudo-nitzschia_granii
ASV_87	0	0	62	0	0	1270	0	0	0	0	0	0	0.933333775	Eukaryota	Archaeplastida	Chlorophyta	Chloropicophyceae	Chloropicales	Chloropicaceae	Chloroparvula	Chloroparvula_pacifica
ASV_89	306	501	37	100	0	34	129	101	65	0	12	0	0.987896884	Eukaryota	Alveolata	Dinoflagellata	Dinophyceae	Dinophyceae_X	Dinophyceae_XX	Dinophyceae_XXX	Dinophyceae_XXX_sp.
ASV_91	230	371	435	64	96	79	0	0	0	0	0	0	0.953986493	Eukaryota	Alveolata	Dinoflagellata	Dinophyceae	Dinophyceae_X	Dinophyceae_XX	Dinophyceae_XXX	Dinophyceae_XXX_sp.
ASV_93	37	39	159	8	35	987	0	0	0	0	0	0	0.999914394	Eukaryota	Alveolata	Dinoflagellata	Syndiniales	Dino-Group-I	Dino-Group-I-Clade-1	Dino-Group-I-Clade-1_X	Dino-Group-I-Clade-1_X_sp.
ASV_94	0	0	0	0	1161	84	0	0	0	0	0	0	0.956304076	Eukaryota	Archaeplastida	Chlorophyta	Chloropicophyceae	Chloropicales	Chloropicaceae	Chloroparvula	Chloroparvula_pacifica
ASV_95	0	0	0	27	0	55	0	26	33	3	0	843	0.913216374	Eukaryota	Alveolata	Dinoflagellata	Dinophyceae	Peridiniales	Protoperidiniaceae	Protoperidinium	Protoperidinium_tricingulatum
ASV_97	255	480	58	193	0	11	12	41	71	3	28	56	0.753043273	Eukaryota	Alveolata	Dinoflagellata	Dinophyceae	Prorocentrales	Prorocentraceae	Prorocentrum	Prorocentrum_sp.
ASV_99	35	91	8	0	34	8	426	174	203	23	35	4	0.999995468	Eukaryota	Alveolata	Dinoflagellata	Syndiniales	Dino-Group-I	Dino-Group-I-Clade-1	Dino-Group-I-Clade-1_X	Dino-Group-I-Clade-1_X_sp.
ASV_101	8	75	1040	0	0	0	0	0	0	0	0	0	0.953000451	Eukaryota	Alveolata	Dinoflagellata	Dinophyceae	Dinophyceae_X	Dinophyceae_XX	Dinophyceae_XXX	Dinophyceae_XXX_sp.
ASV_102	0	18	0	0	0	0	34	230	69	194	497	31	0.984914276	Eukaryota	Alveolata	Dinoflagellata	Dinophyceae	Dinophyceae_X	Dinophyceae_XX	Dinophyceae_XXX	Dinophyceae_XXX_sp.
ASV_103	963	85	0	63	2	0	0	0	0	0	0	1	0.996531087	Eukaryota	Alveolata	Dinoflagellata	Dinophyceae	Dinophyceae_X	Dinophyceae_XX	Dinophyceae_XXX	Dinophyceae_XXX_sp.
ASV_105	5	0	251	120	3	0	0	291	140	0	0	301	0.999873596	Eukaryota	Stramenopiles	Opalozoa	Bicoecea	Anoecales	Cafeteriaceae	Cafeteria
ASV_106	10	7	14	1067	0	0	8	0	0	0	0	0	0.999999889	Eukaryota	Alveolata	Dinoflagellata	Dinophyceae
ASV_107	0	0	0	0	0	0	0	0	0	0	0	1101	0.999772752	Eukaryota	Stramenopiles	Ochrophyta	Bacillariophyta	Bacillariophyta_X	Polar-centric-Mediophyceae	Chaetoceros	Chaetoceros_brevis_3
ASV_109	0	0	0	0	1089	0	0	0	0	0	0	0	0.999845279	Eukaryota	Alveolata	Dinoflagellata	Dinophyceae	Gonyaulacales	Gonyaulacaceae	Gonyaulax	Gonyaulax_sp.
ASV_110	0	0	0	0	1086	0	0	0	0	0	0	0	0.982605464	Eukaryota	Alveolata	Dinoflagellata	Dinophyceae	Dinophyceae_X	Dinophyceae_XX	Dinophyceae_XXX	Dinophyceae_XXX_sp.
ASV_111	408	356	109	181	0	11	0	0	0	0	0	0	0.718987506	Eukaryota	Alveolata	Dinoflagellata	Dinophyceae	Gymnodiniales	Chytriodiniaceae	Dissodinium	Dissodinium_pseudolunula
ASV_112	0	0	0	0	7	0	9	24	665	8	9	247	0.999998921	Eukaryota	Alveolata	Dinoflagellata	Syndiniales	Dino-Group-II	Dino-Group-II-Clade-16	Dino-Group-II-Clade-16_X	Dino-Group-II-Clade-16_X_sp.
ASV_113	47	47	14	387	233	315	0	0	0	0	0	0	0.982058474	Eukaryota	Alveolata	Dinoflagellata	Dinophyceae	Dinophyceae_X	Dinophyceae_XX	Dinophyceae_XXX	Dinophyceae_XXX_sp.
ASV_114	207	283	63	292	44	151	0	0	0	0	0	0	1	Eukaryota	Alveolata	Dinoflagellata	Dinophyceae
ASV_115	0	17	0	0	0	12	152	79	120	50	547	0	0.999846333	Eukaryota	Alveolata	Dinoflagellata	Syndiniales	Dino-Group-II	Dino-Group-II-Clade-10-and-11	Dino-Group-II-Clade-10-and-11_X	Dino-Group-II-Clade-10-and-11_X_sp.
ASV_116	0	0	0	0	0	0	55	673	271	4	1	9	0.959250113	Eukaryota	Alveolata	Ciliophora	Spirotrichea	Tintinnida	Ptychocylididae	Ptychocylis	Ptychocylis_sp.
ASV_117	309	151	55	264	121	122	1	0	0	0	0	0	0.972919057	Eukaryota	Alveolata	Dinoflagellata	Dinophyceae	Dinophyceae_X	Dinophyceae_XX	Dinophyceae_XXX	Dinophyceae_XXX_sp.
ASV_118	226	503	46	149	3	0	16	47	17	0	5	4	0.954230647	Eukaryota	Alveolata	Dinoflagellata	Dinophyceae	Dinophyceae_X	Dinophyceae_XX	Dinophyceae_XXX	Dinophyceae_XXX_sp.
ASV_119	43	175	62	33	0	0	19	244	150	10	124	141	0.986376357	Eukaryota	Alveolata	Dinoflagellata	Dinophyceae	Dinophyceae_X	Dinophyceae_XX	Dinophyceae_XXX	Dinophyceae_XXX_sp.
ASV_120	0	0	0	0	0	1013	0	0	0	0	0	0	0.965868587	Eukaryota	Alveolata	Dinoflagellata	Dinophyceae	Dinophyceae_X	Dinophyceae_XX	Dinophyceae_XXX	Dinophyceae_XXX_sp.
ASV_121	568	444	0	0	0	0	0	0	0	0	0	0	0.999996199	Eukaryota	Alveolata	Dinoflagellata	Syndiniales	Dino-Group-II	Dino-Group-II-Clade-10-and-11	Dino-Group-II-Clade-10-and-11_X	Dino-Group-II-Clade-10-and-11_X_sp.
ASV_122	17	987	0	0	0	0	0	0	0	0	0	0	0.998721657	Eukaryota	Alveolata	Dinoflagellata	Syndiniales	Dino-Group-II	Dino-Group-II-Clade-6	Dino-Group-II-Clade-6_X	Dino-Group-II-Clade-6_X_sp.
ASV_123	0	14	0	0	0	0	54	314	138	16	244	196	0.933946001	Eukaryota	Alveolata	Dinoflagellata	Dinophyceae	Dinophyceae_X	Dinophyceae_XX	Dinophyceae_XXX	Dinophyceae_XXX_sp.
ASV_124	129	598	111	143	2	0	0	0	0	0	0	0	0.908942455	Eukaryota	Stramenopiles	Ochrophyta
ASV_125	759	183	0	31	7	2	0	0	0	0	0	0	0.996442691	Eukaryota	Alveolata	Dinoflagellata	Dinophyceae	Dinophyceae_X	Dinophyceae_XX	Dinophyceae_XXX	Dinophyceae_XXX_sp.
ASV_126	135	338	99	193	0	0	17	51	61	5	22	44	0.998571402	Eukaryota	Hacrobia	Haptophyta	Prymnesiophyceae	Prymnesiales	Chrysochromulinaceae	Chrysochromulina
ASV_127	43	43	10	421	146	263	4	0	11	0	0	0	0.988759556	Eukaryota	Alveolata	Dinoflagellata	Dinophyceae	Dinophyceae_X	Dinophyceae_XX	Dinophyceae_XXX	Dinophyceae_XXX_sp.
ASV_128	540	243	7	158	3	5	0	0	0	0	0	0	0.99334906	Eukaryota	Alveolata	Dinoflagellata	Dinophyceae	Dinophyceae_X	Dinophyceae_XX	Dinophyceae_XXX	Dinophyceae_XXX_sp.
ASV_129	219	225	117	0	0	392	0	0	0	2	0	0	0.792193429	Eukaryota	Alveolata	Dinoflagellata	Dinophyceae	Dinophyceae_X	Dinophyceae_XX	Dinophyceae_XXX	Dinophyceae_XXX_sp.
ASV_130	433	221	48	232	2	0	2	0	1	0	3	2	0.995643085	Eukaryota	Alveolata	Dinoflagellata	Dinophyceae	Dinophyceae_X	Dinophyceae_XX	Dinophyceae_XXX	Dinophyceae_XXX_sp.
ASV_131	236	479	152	72	1	0	0	0	0	0	0	2	0.733478013	Eukaryota	Stramenopiles	Ochrophyta	Dictyochophyceae	Dictyochophyceae_X	Pedinellales
ASV_132	0	941	0	0	0	0	0	0	0	0	0	0	0.983019906	Eukaryota	Rhizaria	Radiolaria	Polycystinea	Collodaria	Sphaerozoidae
ASV_133	360	403	35	140	0	0	0	0	0	0	0	0	0.999995711	Eukaryota	Alveolata	Dinoflagellata	Syndiniales	Dino-Group-I	Dino-Group-I-Clade-1	Dino-Group-I-Clade-1_X	Dino-Group-I-Clade-1_X_sp.
ASV_134	0	0	0	0	0	0	123	124	308	64	137	98	0.999999123	Eukaryota	Alveolata	Dinoflagellata	Syndiniales	Dino-Group-I	Dino-Group-I-Clade-1	Dino-Group-I-Clade-1_X	Dino-Group-I-Clade-1_X_sp.
ASV_135	475	192	19	223	0	0	0	0	0	0	0	0	0.992039464	Eukaryota	Alveolata	Dinoflagellata	Dinophyceae	Dinophyceae_X	Dinophyceae_XX	Dinophyceae_XXX	Dinophyceae_XXX_sp.
ASV_136	0	3	0	0	0	0	572	98	133	3	20	67	0.999594778	Eukaryota	Stramenopiles	Ochrophyta	Bacillariophyta	Bacillariophyta_X	Radial-centric-basal-Coscinodiscophyceae	Corethron	Corethron_inerme
ASV_137	12	15	0	16	7	11	153	72	406	29	68	7	0.999492335	Eukaryota	Stramenopiles	Ochrophyta	Pelagophyceae	Pelagomonadales	Pelagomonadaceae	Pelagococcus	Pelagococcus_sp.
ASV_138	56	130	308	0	188	213	0	0	0	0	0	0	0.923690107	Eukaryota	Archaeplastida	Chlorophyta	Chloropicophyceae	Chloropicales	Chloropicaceae	Chloroparvula	Chloroparvula_B3_sp.
ASV_139	1	125	13	8	15	12	178	102	158	43	134	39	0.999981467	Eukaryota	Alveolata	Dinoflagellata	Syndiniales	Dino-Group-I	Dino-Group-I-Clade-1	Dino-Group-I-Clade-1_X	Dino-Group-I-Clade-1_X_sp.
ASV_140	0	0	114	276	388	81	0	0	0	0	0	0	0.999998677	Eukaryota	Alveolata	Dinoflagellata	Dinophyceae
ASV_141	9	26	20	298	12	10	36	22	16	6	2	360	0.825920094	Eukaryota	Stramenopiles	Ochrophyta	Bacillariophyta	Bacillariophyta_X	Polar-centric-Mediophyceae	Thalassiosira
ASV_142	97	268	37	0	0	0	0	234	127	0	15	64	0.967090711	Eukaryota	Alveolata	Ciliophora	Spirotrichea	Strombidiida	Tontoniidae_A	Spirotontonia	Spirotontonia_grandis
ASV_143	62	561	8	191	0	25	0	0	0	0	0	0	0.999842066	Eukaryota	Alveolata	Dinoflagellata	Syndiniales	Dino-Group-II	Dino-Group-II-Clade-10-and-11	Dino-Group-II-Clade-10-and-11_X	Dino-Group-II-Clade-10-and-11_X_sp.
ASV_144	325	271	47	180	1	12	0	0	0	0	0	4	0.997333947	Eukaryota	Alveolata	Dinoflagellata	Dinophyceae	Dinophyceae_X	Dinophyceae_XX	Dinophyceae_XXX	Dinophyceae_XXX_sp.
ASV_145	97	131	7	3	0	591	0	0	0	0	0	0	0.999972925	Eukaryota	Alveolata	Dinoflagellata	Syndiniales	Dino-Group-II	Dino-Group-II-Clade-10-and-11	Dino-Group-II-Clade-10-and-11_X	Dino-Group-II-Clade-10-and-11_X_sp.
ASV_146	58	664	100	0	0	0	0	0	0	0	0	0	0.909190052	Eukaryota	Alveolata	Dinoflagellata	Dinophyceae
ASV_148	419	225	12	131	0	28	0	0	0	0	0	3	1	Eukaryota	Alveolata	Dinoflagellata	Dinophyceae
ASV_149	17	9	30	760	0	0	0	0	0	0	0	0	0.996497992	Eukaryota	Alveolata	Dinoflagellata
ASV_150	0	0	0	0	0	0	3	0	118	1	87	311	0.999990057	Eukaryota	Alveolata	Dinoflagellata	Syndiniales	Dino-Group-I	Dino-Group-I-Clade-1	Dino-Group-I-Clade-1_X	Dino-Group-I-Clade-1_X_sp.
ASV_152	196	571	30	0	1	0	0	0	0	0	0	2	0.999999658	Eukaryota	Stramenopiles	Ochrophyta	Chrysophyceae	Chrysophyceae_X	Chrysophyceae_Clade-G	Chrysophyceae_Clade-G_X	Chrysophyceae_Clade-G_X_sp.
ASV_153	0	0	0	0	0	0	108	220	113	0	22	33	0.999988697	Eukaryota	Stramenopiles	Ochrophyta	Bacillariophyta	Bacillariophyta_X	Polar-centric-Mediophyceae
ASV_154	28	187	40	105	0	0	85	60	266	0	18	10	0.998537385	Eukaryota	Hacrobia	Haptophyta	Prymnesiophyceae	Prymnesiales	Chrysochromulinaceae	Chrysochromulina
ASV_155	30	72	21	142	0	534	0	0	0	0	0	0	0.867345622	Eukaryota	Alveolata	Dinoflagellata	Dinophyceae	Peridiniales	Thoracosphaeraceae	Scrippsiella	Scrippsiella_sp.
ASV_156	0	3	0	0	0	0	299	272	168	0	17	1	0.844899408	Eukaryota	Archaeplastida	Chlorophyta	Mamiellophyceae	Mamiellales	Mamiellaceae	Mantoniella	Mantoniella_squamata
ASV_157	110	61	28	300	104	171	0	0	0	0	0	0	0.986663975	Eukaryota	Alveolata	Dinoflagellata	Dinophyceae	Dinophyceae_X	Dinophyceae_XX	Dinophyceae_XXX	Dinophyceae_XXX_sp.
ASV_158	5	526	5	0	0	0	37	72	104	0	13	4	0.997123106	Eukaryota	Hacrobia	Haptophyta	Prymnesiophyceae	Prymnesiales	Chrysochromulinaceae	Chrysochromulina
ASV_159	0	0	0	0	0	0	75	385	244	0	47	0	0.999672899	Eukaryota	Stramenopiles	Ochrophyta	Pelagophyceae	Pelagophyceae_X	Pelagophyceae_XX	Pelagophyceae_XXX	Pelagophyceae_XXX_sp.
ASV_160	0	7	1	0	7	44	59	62	388	16	99	2	0.999718	Eukaryota	Stramenopiles	Ochrophyta	Bacillariophyta	Bacillariophyta_X	Raphid-pennate
ASV_161	183	23	103	87	131	224	0	0	0	0	0	0	0.983170408	Eukaryota	Alveolata	Dinoflagellata	Dinophyceae	Dinophyceae_X	Dinophyceae_XX	Dinophyceae_XXX	Dinophyceae_XXX_sp.
ASV_162	0	0	0	0	670	29	14	16	20	0	0	0	0.954206243	Eukaryota	Alveolata	Dinoflagellata	Dinophyceae	Dinophyceae_X	Dinophyceae_XX	Dinophyceae_XXX	Dinophyceae_XXX_sp.
ASV_163	30	369	33	26	0	0	34	39	130	0	22	59	0.999869153	Eukaryota	Hacrobia	Haptophyta	Prymnesiophyceae	Prymnesiales	Chrysochromulinaceae	Chrysochromulina	Chrysochromulina_simplex
ASV_164	76	497	85	86	1	0	0	0	0	0	0	0	0.999685162	Eukaryota	Alveolata	Dinoflagellata	Syndiniales	Dino-Group-II	Dino-Group-II-Clade-10-and-11	Dino-Group-II-Clade-10-and-11_X	Dino-Group-II-Clade-10-and-11_X_sp.
ASV_165	739	0	0	0	0	0	0	0	0	0	0	0	0.923916517	Eukaryota	Alveolata	Dinoflagellata
ASV_166	78	300	76	97	0	5	13	15	122	0	18	1	0.985386572	Eukaryota	Hacrobia	Haptophyta	Prymnesiophyceae	Prymnesiales	Prymnesiaceae	Haptolina
ASV_167	112	400	200	8	0	0	0	0	0	0	0	0	0.718318144	Eukaryota	Alveolata	Dinoflagellata	Dinophyceae
ASV_168	0	0	0	0	0	0	166	321	170	2	25	0	0.999953517	Eukaryota	Archaeplastida	Chlorophyta	Mamiellophyceae	Mamiellales	Mamiellaceae	Micromonas	Micromonas_clade_B3
ASV_169	239	126	0	336	5	11	0	0	0	0	0	0	0.9963274	Eukaryota	Alveolata	Dinoflagellata	Dinophyceae	Dinophyceae_X	Dinophyceae_XX	Dinophyceae_XXX	Dinophyceae_XXX_sp.
ASV_170	0	0	0	0	550	164	0	0	0	0	0	0	0.970720742	Eukaryota	Alveolata	Dinoflagellata	Dinophyceae	Dinophyceae_X	Dinophyceae_XX	Dinophyceae_XXX	Dinophyceae_XXX_sp.
ASV_171	0	0	0	0	302	0	99	10	27	0	0	270	0.999978957	Eukaryota	Alveolata	Dinoflagellata	Syndiniales	Dino-Group-I	Dino-Group-I-Clade-1	Dino-Group-I-Clade-1_X	Dino-Group-I-Clade-1_X_sp.
ASV_172	173	290	0	34	0	0	16	41	64	1	23	67	0.865191102	Eukaryota	Stramenopiles	Ochrophyta	Dictyochophyceae	Dictyochophyceae_X	Dictyochophyceae_XX	Dictyochophyceae_XXX	Dictyochophyceae_XXX_sp.
ASV_173	159	424	45	68	1	8	0	0	0	0	0	0	0.999055215	Eukaryota	Stramenopiles	Sagenista	MAST-4	MAST-4F	MAST-4F_X	MAST-4F_XX	MAST-4F_XX_sp.
ASV_174	28	640	30	0	0	0	0	0	0	0	0	0	0.999999922	Eukaryota	Stramenopiles	Ochrophyta	MOCH-2	MOCH-2_X	MOCH-2_XX	MOCH-2_XXX	MOCH-2_XXX_sp.
ASV_175	143	316	233	2	0	1	0	0	0	0	0	0	1	Eukaryota
ASV_176	0	0	0	0	628	35	0	8	3	0	0	0	1	Eukaryota
ASV_177	0	0	0	0	0	2	8	67	287	13	80	203	0.844533094	Eukaryota	Stramenopiles	Ochrophyta
ASV_178	557	18	0	95	0	0	0	0	0	0	0	0	0.960300934	Eukaryota	Alveolata	Dinoflagellata	Dinophyceae	Dinophyceae_X	Dinophyceae_XX	Dinophyceae_XXX	Dinophyceae_XXX_sp.
ASV_179	486	168	15	0	0	0	0	0	0	0	0	0	0.880223591	Eukaryota	Alveolata	Dinoflagellata	Dinophyceae	Gymnodiniales
ASV_180	0	41	0	0	3	31	77	396	87	1	19	0	0.824085885	Eukaryota	Archaeplastida	Chlorophyta	Mamiellophyceae	Mamiellales	Bathycoccaceae	Bathycoccus	Bathycoccus_prasinos
ASV_181	0	0	0	0	0	0	4	82	494	1	64	2	0.999978643	Eukaryota	Stramenopiles	Ochrophyta	Bolidophyceae	Parmales	Parmales_env_1	Parmales_env_1_X	Parmales_env_1_X_sp.
ASV_182	0	0	0	0	0	0	0	39	330	0	0	292	1	Eukaryota
ASV_183	14	137	267	0	11	225	0	0	0	0	0	0	0.945216192	Eukaryota	Archaeplastida	Chlorophyta	Chloropicophyceae	Chloropicales	Chloropicaceae	Chloropicon	Chloropicon_primus
ASV_184	34	267	69	13	1	2	31	218	13	0	0	2	0.892192713	Eukaryota	Alveolata	Ciliophora	Spirotrichea	Strombidiida_G	Strombidiida_G_X	Strombidium_G_X	Strombidium_G_X_sp.
ASV_185	0	52	264	0	173	155	0	0	0	0	0	0	0.99662333	Eukaryota	Archaeplastida	Chlorophyta	Chloropicophyceae	Chloropicales	Chloropicaceae	Chloroparvula	Chloroparvula_B2_sp.
ASV_186	0	0	0	3	29	11	270	0	29	0	0	278	0.996147122	Eukaryota	Alveolata	Dinoflagellata	Dinophyceae	Dinophyceae_X	Dinophyceae_XX	Dinophyceae_XXX	Dinophyceae_XXX_sp.
ASV_187	14	8	0	24	182	400	0	0	0	0	0	0	0.99234139	Eukaryota	Alveolata	Dinoflagellata	Dinophyceae	Dinophyceae_X	Dinophyceae_XX	Dinophyceae_XXX	Dinophyceae_XXX_sp.
ASV_188	0	0	0	0	0	0	0	0	2	230	0	396	0.900323813	Eukaryota	Alveolata	Dinoflagellata	Dinophyceae	Gymnodiniales	Chytriodiniaceae	Dissodinium	Dissodinium_pseudolunula
ASV_189	115	504	0	0	0	0	0	0	0	0	0	0	0.94992635	Eukaryota	Eukaryota_X	Eukaryota_XX	Eukaryota_XXX	Eukaryota_XXXX	Eukaryota_XXXXX	Eukaryota_XXXXXX	Eukaryota_XXXXXX_sp.
ASV_190	71	0	547	0	0	0	0	0	0	0	0	0	0.995812551	Eukaryota	Alveolata	Dinoflagellata	Dinophyceae	Dinophyceae_X	Dinophyceae_XX	Dinophyceae_XXX	Dinophyceae_XXX_sp.
ASV_191	143	41	9	0	0	4	83	315	12	0	2	0	0.993489569	Eukaryota	Stramenopiles	Ochrophyta	Pelagophyceae	Pelagophyceae_X	Pelagophyceae_XX	Pelagophyceae_XXX	Pelagophyceae_XXX_sp.
ASV_192	4	25	0	83	5	481	0	0	5	0	0	0	0.999343505	Eukaryota	Alveolata	Dinoflagellata	Dinophyceae	Peridiniales	Protoperidiniaceae	Protoperidinium	Protoperidinium_bipes
ASV_193	0	0	0	0	0	0	23	27	38	0	5	489	0.99711323	Eukaryota	Stramenopiles	Ochrophyta	Bacillariophyta	Bacillariophyta_X
ASV_194	169	281	16	141	0	0	0	0	0	0	0	0	0.858211805	Eukaryota	Alveolata	Dinoflagellata	Dinophyceae	Prorocentrales	Prorocentraceae	Prorocentrum	Prorocentrum_sp.
ASV_195	146	144	251	62	0	0	0	0	0	0	0	0	0.991312806	Eukaryota	Alveolata	Dinoflagellata	Dinophyceae	Dinophyceae_X	Dinophyceae_XX	Dinophyceae_XXX	Dinophyceae_XXX_sp.
ASV_196	193	4	364	37	1	0	0	0	0	0	0	0	0.8856532	Eukaryota	Alveolata	Dinoflagellata	Dinophyceae	Dinophyceae_X	Dinophyceae_XX	Dinophyceae_XXX	Dinophyceae_XXX_sp.
ASV_197	0	5	0	0	0	0	32	243	99	10	127	82	0.912023355	Eukaryota	Alveolata	Dinoflagellata	Dinophyceae	Dinophyceae_X	Dinophyceae_XX	Dinophyceae_XXX	Dinophyceae_XXX_sp.
ASV_198	0	7	3	54	0	0	90	34	26	231	111	0	0.715018648	Eukaryota	Stramenopiles	Ochrophyta	Bacillariophyta	Bacillariophyta_X	Raphid-pennate	Cymbella
ASV_199	264	182	4	0	13	7	11	0	7	6	18	75	0.999939175	Eukaryota	Alveolata	Dinoflagellata	Syndiniales	Dino-Group-II	Dino-Group-II-Clade-10-and-11	Dino-Group-II-Clade-10-and-11_X	Dino-Group-II-Clade-10-and-11_X_sp.
ASV_200	0	0	310	237	0	0	0	11	7	0	0	14	0.999970803	Eukaryota	Apusozoa	Apusomonadidae	Apusomonadidae_Group-2	Apusomonadidae_Group-2B	Apusomonadidae_Group-2B_X	Apusomonadidae_Group-2B_XX	Apusomonadidae_Group-2B_XX_sp.
ASV_201	531	2	0	0	1	46	0	0	0	0	0	0	0.989168435	Eukaryota	Alveolata	Dinoflagellata	Dinophyceae	Dinophyceae_X	Dinophyceae_XX	Dinophyceae_XXX	Dinophyceae_XXX_sp.
ASV_202	176	321	0	73	0	0	0	0	8	0	0	0	0.953609857	Eukaryota	Alveolata	Dinoflagellata	Dinophyceae	Dinophyceae_X	Dinophyceae_XX	Dinophyceae_XXX	Dinophyceae_XXX_sp.
ASV_203	14	285	50	145	8	76	0	0	0	0	0	0	0.905094687	Eukaryota	Alveolata	Dinoflagellata	Dinophyceae	Peridiniales	Thoracosphaeraceae	Scrippsiella	Scrippsiella_sp.
ASV_204	400	0	0	178	0	0	0	0	0	0	0	0	0.99984044	Eukaryota	Alveolata	Dinoflagellata	Syndiniales	Dino-Group-II	Dino-Group-II-Clade-10-and-11	Dino-Group-II-Clade-10-and-11_X	Dino-Group-II-Clade-10-and-11_X_sp.
ASV_205	54	365	18	77	0	0	0	0	62	0	0	0	0.998810125	Eukaryota	Hacrobia	Haptophyta	Prymnesiophyceae	Prymnesiales	Chrysochromulinaceae	Chrysochromulina
ASV_206	0	0	0	0	0	0	8	45	242	3	122	105	0.88231632	Eukaryota	Hacrobia	Picozoa	Picozoa_X	Picozoa_XX	Picozoa_XXX	Picomonas	Picomonas_judraskeda
ASV_207	0	0	0	573	0	0	0	0	0	0	0	0	0.912587535	Eukaryota	Alveolata	Dinoflagellata	Syndiniales	Dino-Group-II
ASV_209	0	0	0	0	0	0	0	0	0	0	0	563	0.994787326	Eukaryota	Stramenopiles	Ochrophyta	Bacillariophyta	Bacillariophyta_X	Polar-centric-Mediophyceae
ASV_210	79	144	83	58	0	0	0	28	15	0	28	119	0.979930418	Eukaryota	Alveolata	Dinoflagellata	Dinophyceae	Dinophyceae_X	Dinophyceae_XX	Dinophyceae_XXX	Dinophyceae_XXX_sp.
ASV_211	217	206	83	50	0	5	0	0	0	0	0	0	0.992012504	Eukaryota	Alveolata	Dinoflagellata	Dinophyceae	Dinophyceae_X	Dinophyceae_XX	Dinophyceae_XXX	Dinophyceae_XXX_sp.
ASV_213	0	94	30	0	0	0	12	128	91	5	34	153	0.999939748	Eukaryota	Hacrobia	Picozoa	Picozoa_X	Picozoa_XX	Picozoa_XXX	Picomonas	Picomonas_judraskeda
ASV_214	0	437	11	0	0	56	0	0	0	51	0	0	0.999584882	Eukaryota	Stramenopiles	Ochrophyta	Bacillariophyta	Bacillariophyta_X	Raphid-pennate
ASV_215	42	127	23	16	0	48	42	35	11	48	12	55	0.89250844	Eukaryota	Stramenopiles	Ochrophyta
ASV_216	141	321	60	26	0	2	0	0	0	0	0	1	0.898406849	Eukaryota	Stramenopiles	Ochrophyta
ASV_217	0	0	0	0	2	0	9	62	298	13	155	0	0.931732986	Eukaryota	Hacrobia	Haptophyta	Prymnesiophyceae	Prymnesiales	Chrysochromulinaceae	Chrysochromulina
ASV_218	0	0	0	0	3	28	182	56	79	3	8	44	0.998355207	Eukaryota	Stramenopiles	Ochrophyta	Bacillariophyta	Bacillariophyta_X	Raphid-pennate
ASV_219	234	169	17	121	0	4	0	0	0	0	0	0	0.993143329	Eukaryota	Alveolata	Dinoflagellata	Dinophyceae	Dinophyceae_X	Dinophyceae_XX	Dinophyceae_XXX	Dinophyceae_XXX_sp.
ASV_220	132	216	20	172	0	0	0	0	0	0	0	0	0.992939834	Eukaryota	Alveolata	Dinoflagellata	Dinophyceae	Dinophyceae_X	Dinophyceae_XX	Dinophyceae_XXX	Dinophyceae_XXX_sp.
ASV_221	115	162	147	71	0	0	0	3	9	0	31	0	0.871916641	Eukaryota	Alveolata	Dinoflagellata	Dinophyceae	Dinophyceae_X	Dinophyceae_XX	Dinophyceae_XXX	Dinophyceae_XXX_sp.
ASV_222	0	0	0	0	6	0	106	111	150	0	37	103	0.882086734	Eukaryota	Stramenopiles	Ochrophyta
ASV_224	0	120	36	0	0	85	96	48	48	14	7	68	0.999999693	Eukaryota	Alveolata	Dinoflagellata	Syndiniales	Dino-Group-I	Dino-Group-I-Clade-1	Dino-Group-I-Clade-1_X	Dino-Group-I-Clade-1_X_sp.
ASV_225	68	361	81	23	0	0	0	0	0	0	0	1	0.996108801	Eukaryota	Hacrobia	Haptophyta	Prymnesiophyceae	Prymnesiales	Chrysochromulinaceae	Chrysochromulina
ASV_226	106	0	0	0	0	426	0	0	0	0	0	0	0.996862317	Eukaryota	Alveolata	Dinoflagellata	Dinophyceae	Dinophyceae_X	Dinophyceae_XX	Dinophyceae_XXX	Dinophyceae_XXX_sp.
ASV_227	3	53	232	241	0	0	0	0	0	0	0	0	0.992110305	Eukaryota	Alveolata	Dinoflagellata	Syndiniales	Dino-Group-I	Dino-Group-I-Clade-5	Dino-Group-I-Clade-5_X	Dino-Group-I-Clade-5_X_sp.
ASV_228	0	0	5	0	30	491	0	0	0	0	0	0	0.784255926	Eukaryota	Alveolata	Dinoflagellata	Dinophyceae
ASV_229	49	20	0	15	206	22	0	0	0	98	47	65	0.999993809	Eukaryota	Alveolata	Dinoflagellata	Syndiniales	Dino-Group-I	Dino-Group-I-Clade-1	Dino-Group-I-Clade-1_X	Dino-Group-I-Clade-1_X_sp.
ASV_230	9	68	32	0	0	5	11	189	145	0	49	0	0.994891599	Eukaryota	Alveolata	Dinoflagellata	Syndiniales	Dino-Group-II
ASV_231	0	27	364	0	90	37	0	0	0	0	0	0	0.787082567	Eukaryota	Alveolata	Dinoflagellata	Dinophyceae	Peridiniales	Thoracosphaeraceae	Scrippsiella	Scrippsiella_sp.
ASV_232	0	0	0	0	1	0	62	327	100	0	27	0	0.998614307	Eukaryota	Stramenopiles	Ochrophyta	Pelagophyceae	Pelagophyceae_X	Pelagophyceae_XX	Pelagophyceae_XXX	Pelagophyceae_XXX_sp.
ASV_233	45	33	0	52	209	171	0	0	0	0	0	0	0.973764463	Eukaryota	Alveolata	Dinoflagellata	Dinophyceae	Dinophyceae_X	Dinophyceae_XX	Dinophyceae_XXX	Dinophyceae_XXX_sp.
ASV_234	74	166	198	61	2	2	0	0	0	0	0	0	0.749000992	Eukaryota	Alveolata	Dinoflagellata	Dinophyceae	Prorocentrales	Prorocentraceae	Prorocentrum	Prorocentrum_sp.
ASV_235	49	327	43	70	0	4	0	0	0	0	0	0	0.724710761	Eukaryota	Hacrobia	Haptophyta	Prymnesiophyceae	Prymnesiales	Chrysochromulinaceae	Chrysochromulina
ASV_236	132	96	7	31	38	185	0	0	0	0	0	0	0.968730318	Eukaryota	Alveolata	Dinoflagellata	Dinophyceae	Dinophyceae_X	Dinophyceae_XX	Dinophyceae_XXX	Dinophyceae_XXX_sp.
ASV_237	13	429	47	0	0	0	0	0	0	0	0	0	1	Eukaryota
ASV_238	84	273	93	37	0	0	0	0	0	0	0	0	0.999954687	Eukaryota	Alveolata	Dinoflagellata	Syndiniales	Dino-Group-II	Dino-Group-II-Clade-10-and-11	Dino-Group-II-Clade-10-and-11_X	Dino-Group-II-Clade-10-and-11_X_sp.
ASV_239	255	35	5	185	0	0	0	0	0	0	0	0	0.998479977	Eukaryota	Alveolata	Dinoflagellata	Dinophyceae	Dinophyceae_X	Dinophyceae_XX	Dinophyceae_XXX	Dinophyceae_XXX_sp.
ASV_240	0	479	0	0	0	0	0	0	0	0	0	0	0.970858037	Eukaryota	Hacrobia	Haptophyta	Prymnesiophyceae	Prymnesiales	Chrysochromulinaceae	Chrysochromulina
ASV_241	447	32	0	0	0	0	0	0	0	0	0	0	0.99986039	Eukaryota	Alveolata	Dinoflagellata	Syndiniales	Dino-Group-II	Dino-Group-II-Clade-1	Dino-Group-II-Clade-1_X	Dino-Group-II-Clade-1_X_sp.
ASV_244	0	39	21	0	0	90	51	219	55	0	0	0	0.817583696	Eukaryota	Stramenopiles	Ochrophyta	Pelagophyceae	Pelagomonadales	Pelagomonadaceae
ASV_245	99	153	43	150	0	3	6	0	19	0	0	0	0.998737363	Eukaryota	Hacrobia	Centroheliozoa	Centroheliozoa_X	Pterocystida	Pterocystida_X	Pterocystida_XX	Pterocystida_XX_sp.
ASV_246	373	95	0	0	0	2	0	0	0	0	0	0	0.948876351	Eukaryota	Alveolata	Dinoflagellata
ASV_247	177	244	2	46	0	0	0	0	0	0	0	0	0.992558933	Eukaryota	Alveolata	Dinoflagellata
ASV_248	22	40	73	143	173	13	0	0	0	0	0	0	0.999989114	Eukaryota	Alveolata	Dinoflagellata	Syndiniales	Dino-Group-I	Dino-Group-I-Clade-1	Dino-Group-I-Clade-1_X	Dino-Group-I-Clade-1_X_sp.
ASV_249	32	204	57	161	0	0	0	3	7	0	0	0	0.999881599	Eukaryota	Alveolata	Dinoflagellata	Syndiniales	Dino-Group-II	Dino-Group-II-Clade-10-and-11	Dino-Group-II-Clade-10-and-11_X	Dino-Group-II-Clade-10-and-11_X_sp.
ASV_250	27	129	57	33	0	0	16	14	46	5	33	103	0.982529459	Eukaryota	Hacrobia	Haptophyta	Prymnesiophyceae	Phaeocystales	Phaeocystaceae	Phaeocystis	Phaeocystis_jahnii
ASV_251	0	0	0	0	0	0	0	0	0	0	0	463	0.996921159	Eukaryota	Stramenopiles	Ochrophyta	Bacillariophyta	Bacillariophyta_X	Radial-centric-basal-Coscinodiscophyceae	Guinardia
ASV_252	39	32	0	0	386	0	0	0	0	0	0	0	0.999926467	Eukaryota	Alveolata	Dinoflagellata	Syndiniales	Dino-Group-I	Dino-Group-I-Clade-4	Dino-Group-I-Clade-4_X	Dino-Group-I-Clade-4_X_sp.
ASV_253	243	213	0	0	0	0	0	0	0	0	0	0	1	Eukaryota
ASV_254	0	0	0	0	0	0	13	35	59	2	57	267	0.999461137	Eukaryota	Opisthokonta
ASV_255	137	34	132	113	39	0	0	0	0	0	0	0	0.998182866	Eukaryota	Alveolata	Dinoflagellata	Dinophyceae	Dinophyceae_X	Dinophyceae_XX	Dinophyceae_XXX	Dinophyceae_XXX_sp.
ASV_256	152	0	71	232	0	0	0	0	0	0	0	0	0.988159189	Eukaryota	Alveolata	Dinoflagellata	Dinophyceae	Dinophyceae_X	Dinophyceae_XX	Dinophyceae_XXX	Dinophyceae_XXX_sp.
ASV_257	71	312	7	57	0	0	0	0	3	0	0	0	0.967151881	Eukaryota	Hacrobia	Haptophyta	Prymnesiophyceae	Prymnesiales	Prymnesiaceae	Prymnesium
ASV_258	0	0	0	0	143	34	37	119	115	0	0	2	0.999995673	Eukaryota	Alveolata	Dinoflagellata	Syndiniales	Dino-Group-II	Dino-Group-II-Clade-10-and-11	Dino-Group-II-Clade-10-and-11_X	Dino-Group-II-Clade-10-and-11_X_sp.
ASV_259	100	163	33	153	0	0	0	0	0	0	0	0	0.997430046	Eukaryota	Alveolata	Dinoflagellata	Dinophyceae	Gymnodiniales	Gymnodiniaceae	Gyrodinium	Gyrodinium_dominans
ASV_260	80	52	17	192	41	66	0	0	0	0	0	0	0.713945913	Eukaryota	Alveolata	Dinoflagellata	Dinophyceae	Peridiniales	Thoracosphaeraceae	Scrippsiella	Scrippsiella_sp.
ASV_261	58	242	41	106	0	0	0	0	0	0	0	0	0.999900987	Eukaryota	Stramenopiles	Pseudofungi	MAST-1	MAST-1D	MAST-1D_X	MAST-1D_XX	MAST-1D_XX_sp.
ASV_262	0	0	0	0	0	22	40	112	251	0	1	0	0.869923423	Eukaryota	Stramenopiles	Ochrophyta	Pelagophyceae	Pelagophyceae_X	Pelagophyceae_XX	Pelagophyceae_XXX	Pelagophyceae_XXX_sp.
ASV_263	169	134	0	139	0	0	0	0	0	0	0	0	0.927316237	Eukaryota	Alveolata	Dinoflagellata	Dinophyceae	Dinophyceae_X	Dinophyceae_XX	Dinophyceae_XXX	Dinophyceae_XXX_sp.
ASV_264	5	21	14	44	0	357	0	0	0	0	0	0	0.959917563	Eukaryota	Alveolata	Dinoflagellata	Dinophyceae	Dinophyceae_X	Dinophyceae_XX	Dinophyceae_XXX	Dinophyceae_XXX_sp.
ASV_265	60	197	101	76	0	7	0	0	0	0	0	0	1	Eukaryota	Alveolata	Dinoflagellata	Dinophyceae
ASV_266	10	354	68	9	0	0	0	0	0	0	0	0	0.852539587	Eukaryota	Alveolata	Dinoflagellata	Dinophyceae
ASV_267	0	0	0	0	0	0	108	30	45	13	12	86	0.999997677	Eukaryota	Stramenopiles	Ochrophyta	Bacillariophyta	Bacillariophyta_X	Polar-centric-Mediophyceae
ASV_268	117	283	19	9	0	3	0	0	4	0	0	2	0.896126177	Eukaryota	Hacrobia	Haptophyta	Prymnesiophyceae	Prymnesiales	Prymnesiophyceae_Clade_B4	Prymnesiophyceae_Clade_B4_X	Prymnesiophyceae_Clade_B4_X_sp.
ASV_269	434	0	0	0	0	0	0	0	0	0	0	0	0.780202619	Eukaryota	Alveolata	Dinoflagellata	Syndiniales	Dino-Group-II
ASV_270	149	6	66	0	36	15	0	0	0	22	50	87	0.756941316	Eukaryota	Alveolata	Dinoflagellata	Dinophyceae	Gymnodiniales	Chytriodiniaceae	Dissodinium	Dissodinium_pseudolunula
ASV_271	61	327	0	35	0	0	0	0	0	0	0	3	0.999900459	Eukaryota	Alveolata	Dinoflagellata	Syndiniales	Dino-Group-II	Dino-Group-II-Clade-10-and-11	Dino-Group-II-Clade-10-and-11_X	Dino-Group-II-Clade-10-and-11_X_sp.
ASV_273	422	0	0	0	2	0	0	0	0	0	0	0	0.995228726	Eukaryota	Alveolata	Dinoflagellata
ASV_274	34	352	15	20	0	0	0	0	0	0	0	0	0.974512625	Eukaryota	Stramenopiles	Ochrophyta
ASV_275	238	113	6	64	0	0	0	0	0	0	0	0	0.999436672	Eukaryota	Alveolata	Dinoflagellata	Dinophyceae	Dinophyceae_X	Dinophyceae_XX	Dinophyceae_XXX	Dinophyceae_XXX_sp.
ASV_276	55	26	0	19	93	109	0	0	1	18	2	95	0.961909558	Eukaryota	Alveolata	Dinoflagellata	Dinophyceae	Dinophyceae_X	Dinophyceae_XX	Dinophyceae_XXX	Dinophyceae_XXX_sp.
ASV_277	368	14	0	33	0	0	0	0	0	0	0	0	0.954836537	Eukaryota	Alveolata	Dinoflagellata	Dinophyceae
ASV_278	0	0	0	0	0	413	0	0	0	0	0	0	0.992388001	Eukaryota	Archaeplastida	Chlorophyta	Chloropicophyceae	Chloropicales	Chloropicaceae	Chloroparvula
ASV_279	26	228	0	131	1	24	0	0	0	0	0	0	0.990939544	Eukaryota	Alveolata	Dinoflagellata	Dinophyceae	Dinophyceae_X	Dinophyceae_XX	Dinophyceae_XXX	Dinophyceae_XXX_sp.
ASV_280	31	8	0	40	40	20	0	2	0	4	0	265	0.942069847	Eukaryota	Alveolata	Dinoflagellata	Dinophyceae	Dinophyceae_X	Dinophyceae_XX	Dinophyceae_XXX	Dinophyceae_XXX_sp.
ASV_281	13	0	190	206	0	0	0	0	0	0	0	0	0.949412292	Eukaryota	Alveolata	Dinoflagellata	Dinophyceae	Dinophyceae_X	Dinophyceae_XX	Dinophyceae_XXX	Dinophyceae_XXX_sp.
ASV_283	58	157	116	64	0	7	0	0	0	0	0	0	0.999816773	Eukaryota	Alveolata	Dinoflagellata	Syndiniales	Dino-Group-I	Dino-Group-I-Clade-5	Dino-Group-I-Clade-5_X	Dino-Group-I-Clade-5_X_sp.
ASV_284	68	64	52	55	48	108	0	0	0	0	0	0	0.99917995	Eukaryota	Alveolata	Dinoflagellata	Syndiniales	Dino-Group-I	Dino-Group-I-Clade-4	Dino-Group-I-Clade-4_X	Dino-Group-I-Clade-4_X_sp.
ASV_285	0	0	0	0	0	0	7	0	0	0	0	378	0.999999937	Eukaryota	Stramenopiles	Ochrophyta	Bacillariophyta	Bacillariophyta_X	Radial-centric-basal-Coscinodiscophyceae	Corethron	Corethron_inerme
ASV_286	11	217	17	3	70	57	5	10	0	0	0	1	0.982891175	Eukaryota	Alveolata	Dinoflagellata	Dinophyceae	Dinophyceae_X	Dinophyceae_XX	Dinophyceae_XXX	Dinophyceae_XXX_sp.
ASV_287	153	238	0	0	3	0	0	0	0	0	0	0	1	Eukaryota	Alveolata	Dinoflagellata	Syndiniales	Dino-Group-II	Dino-Group-II-Clade-29	Dino-Group-II-Clade-29_X	Dino-Group-II-Clade-29_X_sp.
ASV_288	34	132	11	216	0	0	0	0	0	0	0	0	0.71005126	Eukaryota	Alveolata	Dinoflagellata	Dinophyceae	Prorocentrales	Prorocentraceae	Prorocentrum	Prorocentrum_sp.
ASV_289	64	318	10	0	0	0	0	0	0	0	0	0	0.991818473	Eukaryota	Alveolata	Dinoflagellata	Dinophyceae	Dinophyceae_X	Dinophyceae_XX	Dinophyceae_XXX	Dinophyceae_XXX_sp.
ASV_290	392	0	0	0	0	0	0	0	0	0	0	0	0.966511603	Eukaryota	Alveolata	Dinoflagellata	Dinophyceae	Dinophyceae_X	Dinophyceae_XX	Dinophyceae_XXX	Dinophyceae_XXX_sp.
ASV_291	0	13	0	0	0	3	27	243	26	5	23	42	0.986506882	Eukaryota	Alveolata	Dinoflagellata	Dinophyceae	Dinophyceae_X	Dinophyceae_XX	Dinophyceae_XXX	Dinophyceae_XXX_sp.
ASV_292	55	267	9	0	8	50	0	0	0	0	0	0	0.965056381	Eukaryota	Alveolata	Dinoflagellata	Dinophyceae	Dinophyceae_X	Dinophyceae_XX	Dinophyceae_XXX	Dinophyceae_XXX_sp.
ASV_293	0	0	0	0	0	388	0	0	0	0	0	0	0.853166968	Eukaryota	Stramenopiles	Ochrophyta	Bacillariophyta	Bacillariophyta_X	Raphid-pennate	Pseudo-nitzschia
ASV_294	84	54	17	77	142	13	0	0	0	0	0	0	0.998901972	Eukaryota	Alveolata	Dinoflagellata	Syndiniales	Dino-Group-I	Dino-Group-I-Clade-3	Dino-Group-I-Clade-3_X	Dino-Group-I-Clade-3_X_sp.
ASV_295	361	15	0	9	2	0	0	0	0	0	0	0	0.971301431	Eukaryota	Alveolata	Dinoflagellata
ASV_296	0	0	234	128	0	2	0	0	8	0	2	12	0.999983217	Eukaryota	Apusozoa	Apusomonadidae	Apusomonadidae_Group-2	Apusomonadidae_Group-2B	Apusomonadidae_Group-2B_X	Apusomonadidae_Group-2B_XX	Apusomonadidae_Group-2B_XX_sp.
ASV_297	15	10	13	126	6	215	0	1	0	0	0	0	0.993292323	Eukaryota	Alveolata	Dinoflagellata	Dinophyceae	Dinophyceae_X	Dinophyceae_XX	Dinophyceae_XXX	Dinophyceae_XXX_sp.
ASV_298	73	171	30	106	1	0	0	2	0	0	0	0	0.931757996	Eukaryota	Hacrobia	Picozoa	Picozoa_X	Picozoa_XX	Picozoa_XXX	Picomonas	Picomonas_judraskeda
ASV_299	0	0	0	0	0	0	44	141	22	1	9	160	0.988864915	Eukaryota	Stramenopiles	Ochrophyta	Bacillariophyta	Bacillariophyta_X	Radial-centric-basal-Coscinodiscophyceae	Rhizosolenia
ASV_300	0	0	0	0	5	0	146	112	117	0	0	0	0.736593034	Eukaryota	Stramenopiles	Ochrophyta	Bacillariophyta	Bacillariophyta_X	Bacillariophyta_XX	Bacillariophyta_XXX	Bacillariophyta_XXX_sp.
ASV_301	0	1	0	0	0	0	0	227	97	3	35	11	0.974397053	Eukaryota	Alveolata	Dinoflagellata	Dinophyceae	Dinophyceae_X	Dinophyceae_XX	Dinophyceae_XXX	Dinophyceae_XXX_sp.
ASV_302	0	0	0	0	0	0	6	263	60	5	9	34	0.994321131	Eukaryota	Alveolata	Dinoflagellata	Dinophyceae	Dinophyceae_X	Dinophyceae_XX	Dinophyceae_XXX	Dinophyceae_XXX_sp.
ASV_303	9	10	16	206	6	13	18	35	15	5	0	17	0.999999905	Eukaryota	Stramenopiles	Ochrophyta	Bacillariophyta	Bacillariophyta_X	Polar-centric-Mediophyceae	Porosira
ASV_304	89	122	41	52	0	76	0	0	0	0	0	0	0.775316881	Eukaryota	Hacrobia	Haptophyta	Prymnesiophyceae	Syracosphaerales	Syracosphaerales_X	Syracosphaerales_XX	Syracosphaerales_XX_sp.
ASV_307	0	377	0	0	0	0	0	0	0	0	0	0	0.999834597	Eukaryota	Alveolata	Ciliophora	Spirotrichea	Strombidiida	Strombidiidae_J	Strombidiidae_J_X	Strombidiidae_J_X_sp.
ASV_308	0	6	0	0	0	17	0	0	0	0	0	348	0.735182212	Eukaryota	Alveolata	Dinoflagellata	Syndiniales	Dino-Group-II	Dino-Group-II-Clade-20	Dino-Group-II-Clade-20_X	Dino-Group-II-Clade-20_X_sp.
ASV_309	0	0	0	369	0	0	0	0	0	0	0	0	0.786399958	Eukaryota	Alveolata	Dinoflagellata	Syndiniales	Dino-Group-II
ASV_310	84	216	30	30	0	3	0	0	0	0	0	0	0.846719254	Eukaryota	Hacrobia	Haptophyta	Prymnesiophyceae	Phaeocystales	Phaeocystaceae	Phaeocystis
ASV_311	11	311	17	0	1	0	0	9	0	0	6	0	0.998774143	Eukaryota	Hacrobia	Haptophyta	Prymnesiophyceae	Prymnesiales	Chrysochromulinaceae	Chrysochromulina
ASV_312	0	0	0	0	0	0	19	13	86	0	62	132	0.996093652	Eukaryota	Rhizaria	Radiolaria	Acantharea	Arthracanthida-Symphyacanthida	Arthracanthida-Symphyacanthida_X
ASV_313	137	78	9	127	0	0	0	0	0	0	0	0	0.995042039	Eukaryota	Alveolata	Dinoflagellata	Dinophyceae	Dinophyceae_X	Dinophyceae_XX	Dinophyceae_XXX	Dinophyceae_XXX_sp.
ASV_314	0	0	0	0	0	351	0	0	0	0	0	0	0.944186214	Eukaryota	Alveolata	Dinoflagellata	Dinophyceae	Dinophyceae_X	Dinophyceae_XX	Dinophyceae_XXX	Dinophyceae_XXX_sp.
ASV_315	0	0	0	350	0	0	0	0	0	0	0	0	0.947303248	Eukaryota	Alveolata	Dinoflagellata	Dinophyceae	Gymnodiniales	Chytriodiniaceae	Dissodinium	Dissodinium_pseudolunula
ASV_316	46	203	58	40	0	0	0	0	0	0	0	0	0.983006114	Eukaryota	Hacrobia	Haptophyta	Haptophyta_Clade_HAP5	Haptophyta_Clade_HAP5_X	Haptophyta_Clade_HAP5_XX	Haptophyta_Clade_HAP5_XXX	Haptophyta_Clade_HAP5_XXX_sp.
ASV_317	0	0	32	0	0	312	0	0	2	0	0	0	0.713858603	Eukaryota	Opisthokonta
ASV_318	0	0	0	0	0	0	86	79	119	0	7	49	1	Eukaryota	Alveolata	Ciliophora	Spirotrichea	Choreotrichida	Leegaardiellidae_B	Leegaardiella	Leegaardiella_sp.
ASV_319	0	0	0	0	0	0	16	183	111	0	3	10	0.728694236	Eukaryota	Stramenopiles	Ochrophyta	Bacillariophyta	Bacillariophyta_X	Raphid-pennate	Halamphora
ASV_320	74	151	29	42	3	41	0	0	0	0	0	0	0.877509949	Eukaryota	Alveolata	Dinoflagellata	Dinophyceae	Dinophyceae_X	Dinophyceae_XX	Dinophyceae_XXX	Dinophyceae_XXX_sp.
ASV_321	150	188	0	0	0	0	0	0	0	0	0	1	0.933446587	Eukaryota	Rhizaria	Radiolaria	Acantharea	Arthracanthida-Symphyacanthida	Arthracanthida-Symphyacanthida_X
ASV_322	23	150	133	16	0	16	0	0	0	0	0	0	0.999825744	Eukaryota	Alveolata	Dinoflagellata	Syndiniales	Dino-Group-II	Dino-Group-II-Clade-14	Dino-Group-II-Clade-14_X	Dino-Group-II-Clade-14_X_sp.
ASV_323	337	0	0	0	0	0	0	0	0	0	0	0	0.957145442	Eukaryota	Alveolata	Dinoflagellata	Syndiniales	Dino-Group-I	Dino-Group-I-Clade-5	Dino-Group-I-Clade-5_X	Dino-Group-I-Clade-5_X_sp.
ASV_324	0	1	0	0	0	0	38	26	187	0	5	6	0.999999982	Eukaryota	Stramenopiles	Ochrophyta	Bacillariophyta	Bacillariophyta_X	Polar-centric-Mediophyceae	Chaetoceros
ASV_325	284	25	0	21	1	0	0	0	0	0	0	0	0.999999999	Eukaryota	Alveolata	Dinoflagellata	Syndiniales	Dino-Group-II	Dino-Group-II-Clade-16	Dino-Group-II-Clade-16_X	Dino-Group-II-Clade-16_X_sp.
ASV_326	28	150	150	2	0	0	0	0	0	0	0	0	0.943391003	Eukaryota	Alveolata	Dinoflagellata
ASV_327	1	9	3	0	16	300	0	0	0	0	0	1	0.998613951	Eukaryota	Alveolata	Dinoflagellata	Syndiniales	Dino-Group-II	Dino-Group-II-Clade-10-and-11	Dino-Group-II-Clade-10-and-11_X	Dino-Group-II-Clade-10-and-11_X_sp.
ASV_328	0	0	0	0	0	0	0	0	0	0	0	330	0.999994923	Eukaryota	Alveolata	Dinoflagellata	Syndiniales	Dino-Group-I	Dino-Group-I-Clade-1	Dino-Group-I-Clade-1_X	Dino-Group-I-Clade-1_X_sp.
ASV_329	0	312	17	0	0	0	0	0	0	0	0	0	0.993169299	Eukaryota	Alveolata	Dinoflagellata	Dinophyceae	Dinophyceae_X	Dinophyceae_XX	Dinophyceae_XXX	Dinophyceae_XXX_sp.
ASV_330	0	134	48	144	0	3	0	0	0	0	0	0	0.993943348	Eukaryota	Alveolata	Dinoflagellata	Dinophyceae	Dinophyceae_X	Dinophyceae_XX	Dinophyceae_XXX	Dinophyceae_XXX_sp.
ASV_331	0	0	0	0	0	0	21	55	205	2	23	21	0.997149886	Eukaryota	Hacrobia	Telonemia	Telonemia_X	Telonemia_XX	Telonemia-Group-2	Telonema-Group-2	Telonema_antarcticum
ASV_332	33	37	0	146	0	111	0	0	0	0	0	0	0.956782192	Eukaryota	Alveolata	Dinoflagellata	Dinophyceae	Dinophyceae_X	Dinophyceae_XX	Dinophyceae_XXX	Dinophyceae_XXX_sp.
ASV_333	180	41	0	62	2	0	0	0	0	0	1	35	0.956411205	Eukaryota	Alveolata	Dinoflagellata	Dinophyceae	Dinophyceae_X	Dinophyceae_XX	Dinophyceae_XXX	Dinophyceae_XXX_sp.
ASV_334	88	232	3	0	1	2	0	0	0	0	0	0	0.999998001	Eukaryota	Stramenopiles	Opalozoa	MAST-3	MAST-3G	MAST-3G_X	MAST-3G_XX	MAST-3G_XX_sp.
ASV_335	46	195	31	54	0	0	0	0	0	0	0	0	0.972665381	Eukaryota	Hacrobia	Haptophyta	Prymnesiophyceae	Prymnesiales	Chrysochromulinaceae	Chrysochromulina
ASV_336	0	19	2	0	0	0	58	58	100	0	15	71	0.999460395	Eukaryota	Hacrobia	Katablepharidophyta	Katablepharidaceae	Katablepharidales	Katablepharidales_X	Leucocryptos	Leucocryptos_sp.
ASV_337	0	3	0	0	4	12	20	68	19	0	1	159	0.999994555	Eukaryota	Alveolata	Ciliophora	Spirotrichea	Tintinnida	Tintinnidae
ASV_338	120	163	14	28	0	0	0	0	0	0	0	0	0.855836776	Eukaryota	Alveolata	Dinoflagellata	Syndiniales
ASV_339	0	147	47	4	0	1	2	103	13	0	6	0	0.862317857	Eukaryota	Alveolata	Ciliophora	Spirotrichea	Strombidiida	Strombidiidae
ASV_340	104	176	0	41	0	0	0	0	0	0	0	0	0.946798183	Eukaryota	Stramenopiles	Ochrophyta	Chrysophyceae	Chrysophyceae_X
ASV_341	47	190	40	44	0	0	0	0	0	0	0	0	0.987173076	Eukaryota	Hacrobia	Haptophyta	Prymnesiophyceae	Prymnesiales	Prymnesiaceae	Prymnesium
ASV_342	92	134	0	95	0	0	0	0	0	0	0	0	0.981241668	Eukaryota	Alveolata	Dinoflagellata	Syndiniales	Dino-Group-I	Dino-Group-I-Clade-5	Dino-Group-I-Clade-5_X	Dino-Group-I-Clade-5_X_sp.
ASV_343	0	0	0	0	0	129	69	0	115	0	0	0	0.940752686	Eukaryota	Stramenopiles	Ochrophyta	Bacillariophyta	Bacillariophyta_X	Raphid-pennate	Pseudo-nitzschia	Pseudo-nitzschia_cf_cuspidata
ASV_344	0	2	0	0	0	13	20	59	36	0	10	169	0.754409337	Eukaryota	Alveolata	Dinoflagellata
ASV_345	65	210	0	39	0	0	0	0	0	0	0	4	0.996760986	Eukaryota	Alveolata	Dinoflagellata	Dinophyceae	Dinophyceae_X	Dinophyceae_XX	Dinophyceae_XXX	Dinophyceae_XXX_sp.
ASV_346	82	218	1	16	0	0	0	0	0	0	0	0	0.985375247	Eukaryota	Stramenopiles	Opalozoa	MAST-3	MAST-3E	MAST-3E_X	MAST-3E_XX	MAST-3E_XX_sp.
ASV_347	161	52	38	57	0	8	0	0	0	0	0	0	0.996681568	Eukaryota	Alveolata	Dinoflagellata	Syndiniales	Dino-Group-II	Dino-Group-II-Clade-6	Dino-Group-II-Clade-6_X	Dino-Group-II-Clade-6_X_sp.
ASV_348	0	0	0	0	205	0	0	0	111	0	0	0	0.999998324	Eukaryota	Archaeplastida	Chlorophyta	Palmophyllophyceae	Prasinococcales	Prasinococcales-Clade-B	Prasinoderma	Prasinoderma_singularis
ASV_349	8	30	21	17	157	82	0	0	0	0	0	0	1	Eukaryota
ASV_350	0	0	0	0	0	0	0	0	0	0	0	315	0.999122729	Eukaryota	Stramenopiles	Ochrophyta	Bacillariophyta	Bacillariophyta_X
ASV_351	0	39	16	13	157	89	0	0	0	0	0	0	0.967671847	Eukaryota	Alveolata	Dinoflagellata	Dinophyceae	Dinophyceae_X	Dinophyceae_XX	Dinophyceae_XXX	Dinophyceae_XXX_sp.
ASV_352	27	28	2	103	49	103	0	0	0	0	0	0	0.979627164	Eukaryota	Alveolata	Dinoflagellata	Dinophyceae	Suessiales	Suessiales_X	Suessiales_XX	Suessiales_XX_sp.
ASV_353	0	10	0	4	0	0	86	0	15	7	13	74	0.999999976	Eukaryota	Stramenopiles	Ochrophyta	Bacillariophyta	Bacillariophyta_X	Radial-centric-basal-Coscinodiscophyceae	Asteromphalus	Asteromphalus_sp.
ASV_354	0	0	0	0	0	311	0	0	0	0	0	0	0.937832167	Eukaryota	Stramenopiles	Ochrophyta	Bacillariophyta	Bacillariophyta_X	Raphid-pennate	Pseudo-nitzschia	Pseudo-nitzschia_granii
ASV_355	5	18	5	0	0	0	22	90	74	0	75	20	0.992209508	Eukaryota	Stramenopiles	Ochrophyta	Dictyochophyceae	Dictyochophyceae_X	Florenciellales	Pseudochattonella	Pseudochattonella_farcimen
ASV_356	0	0	0	0	0	0	21	103	99	0	15	57	0.999636341	Eukaryota	Opisthokonta	Choanoflagellida	Choanoflagellatea	Acanthoecida	Stephanoecidae_Group_H	Stephanoeca_Group_H	Stephanoeca_cauliculata
ASV_357	0	3	0	0	0	0	44	21	39	0	184	17	0.801586457	Eukaryota	Opisthokonta	Fungi
ASV_358	79	139	34	52	1	3	0	0	0	0	0	0	0.979366655	Eukaryota	Hacrobia	Haptophyta	Prymnesiophyceae	Phaeocystales	Phaeocystaceae	Phaeocystis	Phaeocystis_rex
ASV_359	13	9	0	35	55	196	0	0	0	0	0	0	0.97601487	Eukaryota	Alveolata	Dinoflagellata	Dinophyceae	Dinophyceae_X	Dinophyceae_XX	Dinophyceae_XXX	Dinophyceae_XXX_sp.
ASV_360	0	0	27	279	0	0	0	0	0	0	0	0	0.843049338	Eukaryota	Alveolata	Dinoflagellata	Dinophyceae	Dinophyceae_X	Dinophyceae_XX	Dinophyceae_XXX	Dinophyceae_XXX_sp.
ASV_361	0	0	0	0	0	0	6	12	11	0	35	229	0.773693252	Eukaryota	Opisthokonta	Fungi	Chytridiomycota	Chytridiomycotina	Chytridiomycetes	Aphelidium	Aphelidium_sp.
ASV_362	0	0	0	0	0	0	5	83	51	5	157	0	0.947715019	Eukaryota	Alveolata	Ciliophora	Spirotrichea	Strombidiida
ASV_363	0	1	0	0	0	0	13	137	76	0	61	7	0.999999779	Eukaryota	Stramenopiles	Ochrophyta	MOCH-2	MOCH-2_X	MOCH-2_XX	MOCH-2_XXX	MOCH-2_XXX_sp.
ASV_364	21	61	0	0	0	0	7	30	101	6	58	6	0.74549281	Eukaryota	Alveolata	Ciliophora	Spirotrichea	Strombidiida	Tontoniidae_B
ASV_365	28	200	0	73	0	0	0	0	0	0	0	0	0.998616222	Eukaryota	Alveolata	Dinoflagellata	Dinophyceae	Dinophyceae_X	Dinophyceae_XX	Dinophyceae_XXX	Dinophyceae_XXX_sp.
ASV_366	121	131	0	49	0	0	0	0	0	0	0	0	0.743613531	Eukaryota	Alveolata	Dinoflagellata
ASV_367	29	7	12	53	85	102	0	5	3	4	0	0	0.997925662	Eukaryota	Alveolata	Dinoflagellata	Syndiniales	Dino-Group-I	Dino-Group-I-Clade-4	Dino-Group-I-Clade-4_X	Dino-Group-I-Clade-4_X_sp.
ASV_368	4	0	156	120	0	0	0	8	2	0	0	6	0.999971273	Eukaryota	Apusozoa	Apusomonadidae	Apusomonadidae_Group-2	Apusomonadidae_Group-2B	Apusomonadidae_Group-2B_X	Apusomonadidae_Group-2B_XX	Apusomonadidae_Group-2B_XX_sp.
ASV_369	0	4	0	0	0	0	8	0	198	0	54	30	0.779899376	Eukaryota	Opisthokonta	Fungi	Fungi_X	Fungi_XX	Fungi_XXX	Fungi_XXXX	Fungi_XXXX_sp.
ASV_370	0	0	0	0	0	0	0	0	0	0	298	0	0.991641811	Eukaryota	Alveolata	Dinoflagellata	Syndiniales	Dino-Group-II	Dino-Group-II-Clade-47	Dino-Group-II-Clade-47_X	Dino-Group-II-Clade-47_X_sp.
ASV_371	121	151	0	25	0	0	0	0	0	0	0	0	0.834043273	Eukaryota	Opisthokonta	Fungi
ASV_372	3	58	0	0	0	235	0	0	0	0	0	0	0.999996057	Eukaryota	Alveolata	Dinoflagellata	Dinophyceae	Gonyaulacales	Ceratiaceae	Tripos
ASV_373	110	3	150	27	0	6	0	0	0	0	0	0	0.999218345	Eukaryota	Alveolata	Dinoflagellata	Syndiniales	Dino-Group-II	Dino-Group-II-Clade-3	Dino-Group-II-Clade-3_X	Dino-Group-II-Clade-3_X_sp.
ASV_374	0	32	9	0	0	0	13	37	41	11	109	28	0.952924172	Eukaryota	Hacrobia	Picozoa	Picozoa_X	Picozoa_XX	Picozoa_XXX	Picomonas	Picomonas_judraskeda
ASV_375	0	0	0	0	148	144	0	0	0	0	0	0	0.942303228	Eukaryota	Alveolata	Dinoflagellata	Dinophyceae	Gonyaulacales	Pyrophacaceae	Fragilidium
ASV_376	39	177	49	26	0	0	0	0	0	0	0	0	0.929623336	Eukaryota	Alveolata	Dinoflagellata	Syndiniales	Dino-Group-II	Dino-Group-II-Clade-3	Dino-Group-II-Clade-3_X	Dino-Group-II-Clade-3_X_sp.
ASV_377	100	108	6	37	10	7	2	0	0	0	4	15	1	Eukaryota	Alveolata	Dinoflagellata	Syndiniales	Dino-Group-II	Dino-Group-II-Clade-14	Dino-Group-II-Clade-14_X	Dino-Group-II-Clade-14_X_sp.
ASV_378	288	0	0	0	0	0	0	0	0	0	0	0	0.990636143	Eukaryota	Alveolata	Dinoflagellata	Dinophyceae	Dinophyceae_X	Dinophyceae_XX	Dinophyceae_XXX	Dinophyceae_XXX_sp.
ASV_379	0	259	27	0	0	0	0	0	0	0	0	0	0.999907165	Eukaryota	Alveolata	Dinoflagellata	Syndiniales	Dino-Group-II	Dino-Group-II-Clade-6	Dino-Group-II-Clade-6_X	Dino-Group-II-Clade-6_X_sp.
ASV_380	64	129	12	79	0	0	0	0	0	0	0	0	0.994250864	Eukaryota	Hacrobia	Haptophyta	Prymnesiophyceae	Prymnesiales	Prymnesiaceae	Prymnesium
ASV_381	0	283	0	0	0	0	0	0	0	0	0	0	0.957747757	Eukaryota	Alveolata	Dinoflagellata
ASV_382	0	18	0	7	0	254	0	0	0	0	0	0	0.962587019	Eukaryota	Alveolata	Dinoflagellata	Dinophyceae	Dinophyceae_X	Dinophyceae_XX	Dinophyceae_XXX	Dinophyceae_XXX_sp.
ASV_383	73	60	75	67	0	2	0	0	0	0	0	0	0.943684107	Eukaryota	Alveolata	Dinoflagellata	Dinophyceae	Dinophyceae_X	Dinophyceae_XX	Dinophyceae_XXX	Dinophyceae_XXX_sp.
ASV_384	0	0	14	0	84	179	0	0	0	0	0	0	0.737214719	Eukaryota	Archaeplastida	Chlorophyta	Chloropicophyceae	Chloropicales	Chloropicaceae	Chloropicon	Chloropicon_primus
ASV_385	0	0	0	277	0	0	0	0	0	0	0	0	0.937947864	Eukaryota	Alveolata	Dinoflagellata	Dinophyceae	Gymnodiniales	Chytriodiniaceae	Dissodinium	Dissodinium_pseudolunula
ASV_386	93	112	57	14	0	0	0	0	0	0	0	0	0.993288768	Eukaryota	Hacrobia	Haptophyta	Prymnesiophyceae
ASV_387	12	204	14	38	0	6	0	0	0	0	0	0	0.964577079	Eukaryota	Alveolata	Dinoflagellata	Dinophyceae
ASV_388	257	11	4	0	2	0	0	0	0	0	0	0	0.996668221	Eukaryota	Alveolata	Dinoflagellata	Dinophyceae	Dinophyceae_X	Dinophyceae_XX	Dinophyceae_XXX	Dinophyceae_XXX_sp.
ASV_389	52	67	107	43	1	4	0	0	0	0	0	0	0.733646474	Eukaryota	Alveolata	Dinoflagellata	Dinophyceae	Dinophyceae_X	Dinophyceae_XX	Dinophyceae_XXX	Dinophyceae_XXX_sp.
ASV_390	59	90	25	52	0	0	3	19	13	1	10	0	0.929853706	Eukaryota	Alveolata	Dinoflagellata	Dinophyceae	Dinophyceae_X	Dinophyceae_XX	Dinophyceae_XXX	Dinophyceae_XXX_sp.
ASV_391	272	0	0	0	0	0	0	0	0	0	0	0	0.999471155	Eukaryota	Alveolata	Dinoflagellata	Dinophyceae	Dinophyceae_X	Dinophyceae_XX	Dinophyceae_XXX	Dinophyceae_XXX_sp.
ASV_392	0	0	272	0	0	0	0	0	0	0	0	0	0.993169054	Eukaryota	Hacrobia	Haptophyta	Prymnesiophyceae
ASV_393	0	1	0	0	0	0	0	94	63	5	38	55	0.771841045	Eukaryota	Opisthokonta	Choanoflagellida	Choanoflagellatea	Acanthoecida	Stephanoecidae_Group_D	Acanthocorbis	Acanthocorbis_unguiculata
ASV_394	71	50	7	12	12	6	0	0	17	2	36	43	0.999795912	Eukaryota	Rhizaria	Radiolaria	Acantharea	Arthracanthida-Symphyacanthida	Arthracanthida-Symphyacanthida_X
ASV_395	21	242	0	6	1	0	0	0	0	0	0	0	0.890514792	Eukaryota	Alveolata	Dinoflagellata	Syndiniales	Dino-Group-I	Dino-Group-I-Clade-1	Dino-Group-I-Clade-1_X	Dino-Group-I-Clade-1_X_sp.
ASV_396	51	197	12	0	0	0	0	0	0	0	9	0	0.999998402	Eukaryota	Alveolata	Dinoflagellata	Syndiniales	Dino-Group-II	Dino-Group-II-Clade-16	Dino-Group-II-Clade-16_X	Dino-Group-II-Clade-16_X_sp.
ASV_397	0	9	3	0	0	0	13	10	175	0	21	36	0.702376773	Eukaryota	Hacrobia	Haptophyta	Prymnesiophyceae	Calcihaptophycidae	Rhabdosphaeraceae	Algirosphaera	Algirosphaera_sp.
ASV_398	22	87	62	93	0	0	0	0	0	0	0	1	1	Eukaryota	Alveolata	Dinoflagellata	Syndiniales	Dino-Group-II	Dino-Group-II-Clade-17	Dino-Group-II-Clade-17_X	Dino-Group-II-Clade-17_X_sp.
ASV_399	0	0	0	0	0	0	13	0	1	0	0	154	0.922927573	Eukaryota	Alveolata	Dinoflagellata	Dinophyceae	Dinophyceae_X	Dinophyceae_XX	Dinophyceae_XXX	Dinophyceae_XXX_sp.
ASV_400	0	108	3	0	0	152	0	0	0	0	0	0	0.767384848	Eukaryota	Stramenopiles	Ochrophyta	Bacillariophyta	Bacillariophyta_X	Raphid-pennate	Pseudo-nitzschia	Pseudo-nitzschia_granii
ASV_401	0	1	1	0	0	1	5	64	180	3	0	0	0.811879863	Eukaryota	Rhizaria	Cercozoa	Filosa-Thecofilosea	Cryomonadida	Protaspa-lineage	Protaspa	Protaspa_grandis
ASV_402	0	5	0	98	55	103	0	0	0	0	0	0	0.995724788	Eukaryota	Alveolata	Dinoflagellata	Dinophyceae	Dinophyceae_X	Dinophyceae_XX	Dinophyceae_XXX	Dinophyceae_XXX_sp.
ASV_403	257	2	0	0	0	0	0	0	0	0	0	0	0.931417609	Eukaryota	Alveolata	Dinoflagellata	Dinophyceae	Gymnodiniales	Chytriodiniaceae	Dissodinium	Dissodinium_pseudolunula
ASV_404	69	186	4	0	0	0	0	0	0	0	0	0	0.830897827	Eukaryota	Alveolata	Dinoflagellata	Dinophyceae
ASV_405	24	92	142	0	0	0	0	0	0	0	0	0	0.999893937	Eukaryota	Alveolata	Dinoflagellata	Syndiniales	Dino-Group-II	Dino-Group-II-Clade-6	Dino-Group-II-Clade-6_X	Dino-Group-II-Clade-6_X_sp.
ASV_406	258	0	0	0	0	0	0	0	0	0	0	0	0.999998756	Eukaryota	Alveolata	Dinoflagellata	Dinophyceae	Gonyaulacales	Ceratiaceae	Tripos
ASV_407	0	1	0	0	0	0	0	0	11	10	10	206	0.979135225	Eukaryota	Alveolata	Dinoflagellata	Dinophyceae	Dinophyceae_X	Dinophyceae_XX	Dinophyceae_XXX	Dinophyceae_XXX_sp.
ASV_408	0	0	0	0	0	0	46	144	66	0	0	0	0.999935979	Eukaryota	Archaeplastida	Chlorophyta	Mamiellophyceae	Mamiellales	Mamiellaceae	Micromonas	Micromonas_clade_B3
ASV_409	0	0	0	0	0	0	21	96	105	0	19	2	0.990566951	Eukaryota	Stramenopiles	Ochrophyta	MOCH-2	MOCH-2_X	MOCH-2_XX	MOCH-2_XXX	MOCH-2_XXX_sp.
ASV_410	0	198	35	20	0	0	0	0	0	0	0	0	0.999808796	Eukaryota	Alveolata	Ciliophora	Spirotrichea	Strombidiida	Strombidiidae_J	Strombidiidae_J_X	Strombidiidae_J_X_sp.
ASV_411	0	0	0	249	0	0	0	0	0	0	0	0	0.987125901	Eukaryota	Alveolata	Dinoflagellata	Syndiniales	Dino-Group-II	Dino-Group-II_X	Dino-Group-II_XX	Dino-Group-II_XX_sp.
ASV_412	105	134	0	8	0	0	0	0	0	0	1	0	0.999370823	Eukaryota	Alveolata	Dinoflagellata	Syndiniales	Dino-Group-I	Dino-Group-I-Clade-1	Dino-Group-I-Clade-1_X	Dino-Group-I-Clade-1_X_sp.
ASV_413	19	170	24	25	0	10	0	0	0	0	0	0	0.954365889	Eukaryota	Alveolata	Dinoflagellata	Dinophyceae	Dinophyceae_X	Dinophyceae_XX	Dinophyceae_XXX	Dinophyceae_XXX_sp.
ASV_414	13	65	22	51	9	86	0	0	0	0	0	0	0.990148681	Eukaryota	Alveolata	Dinoflagellata	Dinophyceae	Dinophyceae_X	Dinophyceae_XX	Dinophyceae_XXX	Dinophyceae_XXX_sp.
ASV_415	112	0	59	72	3	0	0	0	0	0	0	0	0.995025848	Eukaryota	Alveolata	Dinoflagellata	Dinophyceae	Dinophyceae_X	Dinophyceae_XX	Dinophyceae_XXX	Dinophyceae_XXX_sp.
ASV_416	120	115	10	0	0	0	0	0	0	0	0	0	0.998577013	Eukaryota	Alveolata	Dinoflagellata
ASV_417	0	0	0	0	0	0	8	82	89	2	31	31	0.993202319	Eukaryota	Alveolata	Dinoflagellata	Dinophyceae	Dinophyceae_X	Dinophyceae_XX	Dinophyceae_XXX	Dinophyceae_XXX_sp.
ASV_418	0	99	0	144	0	0	0	0	0	0	0	0	0.900910695	Eukaryota	Hacrobia	Haptophyta	Prymnesiophyceae	Phaeocystales	Phaeocystaceae	Phaeocystis	Phaeocystis_jahnii
ASV_419	15	188	8	27	0	5	0	0	0	0	0	0	0.998780138	Eukaryota	Hacrobia	Haptophyta	Prymnesiophyceae	Prymnesiales	Chrysochromulinaceae	Chrysochromulina
ASV_420	0	165	0	0	18	60	0	0	0	0	0	0	1	Eukaryota	Alveolata	Dinoflagellata	Dinophyceae
ASV_421	39	118	0	85	0	0	0	0	0	0	0	0	0.907497065	Eukaryota	Stramenopiles	Ochrophyta	Chrysophyceae	Chrysophyceae_X
ASV_422	0	242	0	0	0	0	0	0	0	0	0	0	0.999997534	Eukaryota	Alveolata	Dinoflagellata	Syndiniales	Dino-Group-I	Dino-Group-I-Clade-1	Dino-Group-I-Clade-1_X	Dino-Group-I-Clade-1_X_sp.
ASV_423	28	118	3	87	5	0	0	0	0	0	0	0	0.841091257	Eukaryota	Hacrobia	Haptophyta	Prymnesiophyceae	Prymnesiales	Chrysochromulinaceae	Chrysochromulina
ASV_424	15	226	0	0	0	0	0	0	0	0	0	0	0.761471193	Eukaryota	Alveolata	Ciliophora	Spirotrichea	Strombidiida	Strombidiidae_L	Strombidiidae_L_X	Strombidiidae_L_X_sp.
ASV_425	0	0	0	0	0	1	30	42	147	0	0	16	0.957569698	Eukaryota	Stramenopiles	Opalozoa	MAST-3	MAST-3E	MAST-3E_X	MAST-3E_XX	MAST-3E_XX_sp.
ASV_426	1	0	0	0	0	0	46	39	72	0	11	58	1	Eukaryota
ASV_427	141	37	4	51	6	0	0	0	1	0	0	0	0.999999999	Eukaryota	Rhizaria	Radiolaria	Acantharea	Arthracanthida-Symphyacanthida	Arthracanthida-Symphyacanthida_X
ASV_428	16	133	77	14	0	0	0	0	0	0	0	0	0.82514231	Eukaryota	Hacrobia	Haptophyta	Prymnesiophyceae	Prymnesiales	Prymnesiaceae
ASV_429	4	106	63	62	5	0	0	0	0	0	0	0	0.99987267	Eukaryota	Alveolata	Dinoflagellata	Syndiniales	Dino-Group-II	Dino-Group-II-Clade-10-and-11	Dino-Group-II-Clade-10-and-11_X	Dino-Group-II-Clade-10-and-11_X_sp.
ASV_430	0	0	78	133	0	0	0	0	2	0	22	4	0.775286541	Eukaryota	Stramenopiles	Opalozoa	Bicoecea	Anoecales	Cafeteriaceae	Pseudobodo
ASV_431	0	5	0	0	0	0	1	0	99	11	117	0	0.911684806	Eukaryota	Hacrobia	Telonemia	Telonemia_X	Telonemia_XX	Telonemia-Group-1	Telonema-Group-1	Telonema_sp.
ASV_432	0	0	0	0	0	0	0	0	0	0	0	238	0.935200907	Eukaryota	Stramenopiles	Ochrophyta	Bacillariophyta	Bacillariophyta_X	Raphid-pennate
ASV_433	23	163	22	3	0	0	0	4	14	0	2	0	0.969224926	Eukaryota	Stramenopiles	Ochrophyta	Bolidophyceae	Parmales	Parmales_X	Parmales_XX	Parmales_XX_sp.
ASV_434	42	177	0	0	0	0	2	2	5	0	0	3	0.711847416	Eukaryota	Alveolata	Dinoflagellata	Syndiniales	Dino-Group-II	Dino-Group-II-Clade-10-and-11	Dino-Group-II-Clade-10-and-11_X	Dino-Group-II-Clade-10-and-11_X_sp.
ASV_435	111	0	0	0	0	72	29	11	6	0	0	0	0.999992552	Eukaryota	Alveolata	Dinoflagellata	Syndiniales	Dino-Group-II	Dino-Group-II-Clade-10-and-11	Dino-Group-II-Clade-10-and-11_X	Dino-Group-II-Clade-10-and-11_X_sp.
ASV_436	113	37	13	65	0	0	0	0	0	0	0	0	0.824318123	Eukaryota	Alveolata	Dinoflagellata	Dinophyceae	Prorocentrales	Prorocentraceae	Prorocentrum	Prorocentrum_sp.
ASV_437	7	0	0	0	0	0	5	72	49	0	24	65	0.999915025	Eukaryota	Alveolata	Dinoflagellata	Dinophyceae	Gymnodiniales	Gymnodiniaceae	Gyrodinium	Gyrodinium_dominans
ASV_438	0	0	2	0	0	0	4	3	186	0	11	20	0.999397799	Eukaryota	Stramenopiles	Ochrophyta	Bolidophyceae	Parmales	Parmales_env_3	Parmales_env_3B	Parmales_env_3B_sp.
ASV_439	13	0	0	214	0	0	0	0	0	0	0	0	0.999999991	Eukaryota	Alveolata	Dinoflagellata	Syndiniales	Dino-Group-II	Dino-Group-II-Clade-22	Dino-Group-II-Clade-22_X	Dino-Group-II-Clade-22_X_sp.
ASV_440	0	0	0	0	226	0	0	0	0	0	0	0	0.851228963	Eukaryota	Alveolata	Dinoflagellata	Dinophyceae	Dinophyceae_X	Dinophyceae_XX	Dinophyceae_XXX	Dinophyceae_XXX_sp.
ASV_441	0	0	0	0	0	0	67	11	35	5	0	0	0.995646112	Eukaryota	Stramenopiles	Ochrophyta	Bacillariophyta	Bacillariophyta_X	Raphid-pennate
ASV_442	0	0	0	0	0	0	26	124	37	0	3	34	0.999999917	Eukaryota	Stramenopiles	Ochrophyta	MOCH-2	MOCH-2_X	MOCH-2_XX	MOCH-2_XXX	MOCH-2_XXX_sp.
ASV_443	62	56	12	83	0	11	0	0	0	0	0	0	0.999833153	Eukaryota	Alveolata	Dinoflagellata	Syndiniales	Dino-Group-II	Dino-Group-II-Clade-10-and-11	Dino-Group-II-Clade-10-and-11_X	Dino-Group-II-Clade-10-and-11_X_sp.
ASV_444	0	0	0	0	0	0	0	0	0	0	0	224	0.997992869	Eukaryota	Alveolata	Dinoflagellata	Dinophyceae	Dinophyceae_X	Dinophyceae_XX	Dinophyceae_XXX	Dinophyceae_XXX_sp.
ASV_445	55	85	0	82	0	0	0	0	0	0	0	0	0.999933123	Eukaryota	Hacrobia	Telonemia	Telonemia_X	Telonemia_XX	Telonemia-Group-2	Telonema-Group-2	Telonema_antarcticum
ASV_446	23	176	18	4	0	1	0	0	0	0	0	0	1	Eukaryota
ASV_448	0	2	97	0	98	24	0	0	0	0	0	0	0.725912664	Eukaryota	Alveolata
ASV_449	219	2	0	0	0	0	0	0	0	0	0	0	0.999999823	Eukaryota	Alveolata	Dinoflagellata	Syndiniales	Dino-Group-II	Dino-Group-II-Clade-1	Dino-Group-II-Clade-1_X	Dino-Group-II-Clade-1_X_sp.
ASV_450	23	99	67	13	0	5	0	13	0	0	0	0	0.785417074	Eukaryota	Hacrobia	Haptophyta	Prymnesiophyceae	Prymnesiales	Chrysochromulinaceae	Chrysochromulina
ASV_451	40	85	21	40	2	30	0	0	0	0	0	0	0.925411179	Eukaryota	Alveolata	Dinoflagellata	Dinophyceae	Dinophyceae_X	Dinophyceae_XX	Dinophyceae_XXX	Dinophyceae_XXX_sp.
ASV_452	0	0	0	0	2	0	8	0	6	0	0	204	0.996344628	Eukaryota	Hacrobia	Haptophyta	Prymnesiophyceae
ASV_453	3	171	0	45	0	0	0	0	0	0	0	0	0.998830238	Eukaryota	Hacrobia	Telonemia	Telonemia_X	Telonemia_XX	Telonemia-Group-2	Telonema-Group-2	Telonema_antarcticum
ASV_454	0	0	0	0	0	0	0	4	0	0	0	9	0.868763516	Eukaryota	Stramenopiles	Ochrophyta	Bacillariophyta	Bacillariophyta_X	Raphid-pennate
ASV_455	12	122	83	0	0	0	0	0	0	0	0	0	0.95700352	Eukaryota	Hacrobia	Haptophyta	Prymnesiophyceae	Calcihaptophycidae	Rhabdosphaeraceae	Algirosphaera
ASV_456	29	85	10	93	0	0	0	0	0	0	0	0	0.996007703	Eukaryota	Stramenopiles	Pseudofungi	MAST-1	MAST-1D	MAST-1D_X	MAST-1D_XX	MAST-1D_XX_sp.
ASV_457	52	153	0	12	0	0	0	0	0	0	0	0	0.999999968	Eukaryota	Stramenopiles	Ochrophyta	MOCH-5	MOCH-5_X	MOCH-5_XX	MOCH-5_XXX	MOCH-5_XXX_sp.
ASV_458	0	0	173	0	33	11	0	0	0	0	0	0	0.999980808	Eukaryota	Alveolata	Dinoflagellata	Dinophyceae
ASV_459	14	6	0	28	41	119	0	0	7	0	0	0	0.994871643	Eukaryota	Alveolata	Dinoflagellata	Dinophyceae	Dinophyceae_X	Dinophyceae_XX	Dinophyceae_XXX	Dinophyceae_XXX_sp.
ASV_460	28	188	0	0	0	0	0	0	0	0	0	0	1	Eukaryota	Alveolata	Dinoflagellata	Syndiniales	Dino-Group-II	Dino-Group-II-Clade-17	Dino-Group-II-Clade-17_X	Dino-Group-II-Clade-17_X_sp.
ASV_461	0	0	0	0	0	0	0	54	52	0	108	0	0.999846614	Eukaryota	Stramenopiles	Ochrophyta	Bacillariophyta	Bacillariophyta_X	Raphid-pennate
ASV_462	0	0	0	0	0	0	3	3	6	0	8	152	0.996682915	Eukaryota	Stramenopiles	Ochrophyta	Bacillariophyta	Bacillariophyta_X	Radial-centric-basal-Coscinodiscophyceae	Proboscia	Proboscia_inermis
ASV_463	0	0	0	214	0	0	0	0	0	0	0	0	0.735467238	Eukaryota	Alveolata	Dinoflagellata	Dinophyceae	Gymnodiniales
ASV_464	0	24	78	5	45	59	2	0	0	0	0	0	0.790052364	Eukaryota	Alveolata	Dinoflagellata	Dinophyceae
ASV_465	18	137	41	17	0	0	0	0	0	0	0	0	0.989972652	Eukaryota	Stramenopiles	Opalozoa	MAST-3	MAST-3E	MAST-3E_X	MAST-3E_XX	MAST-3E_XX_sp.
ASV_466	0	0	0	0	0	0	11	53	52	0	5	91	0.885500229	Eukaryota	Hacrobia	Picozoa	Picozoa_X	Picozoa_XX	Picozoa_XXX	Picomonas	Picomonas_judraskeda
ASV_467	0	0	0	0	212	0	0	0	0	0	0	0	0.988421343	Eukaryota	Alveolata	Dinoflagellata	Dinophyceae	Dinophyceae_X	Dinophyceae_XX	Dinophyceae_XXX	Dinophyceae_XXX_sp.
ASV_468	0	0	0	212	0	0	0	0	0	0	0	0	0.86428968	Eukaryota	Alveolata	Dinoflagellata	Dinophyceae	Dinophyceae_X	Dinophyceae_XX	Dinophyceae_XXX	Dinophyceae_XXX_sp.
ASV_469	0	0	0	0	0	0	16	23	95	0	14	52	0.791578143	Eukaryota	Stramenopiles	Ochrophyta	Bolidophyceae	Parmales	Parmales_X	Parmales_XX	Parmales_XX_sp.
ASV_470	0	6	0	28	52	125	0	0	0	0	0	0	0.848359977	Eukaryota	Alveolata	Dinoflagellata	Dinophyceae	Dinophyceae_X	Dinophyceae_XX	Dinophyceae_XXX	Dinophyceae_XXX_sp.
ASV_471	99	0	105	7	0	0	0	0	0	0	0	0	0.999999994	Eukaryota	Alveolata	Dinoflagellata	Syndiniales	Dino-Group-II	Dino-Group-II-Clade-16	Dino-Group-II-Clade-16_X	Dino-Group-II-Clade-16_X_sp.
ASV_473	0	0	0	0	0	0	8	50	141	0	4	1	0.999999992	Eukaryota	Hacrobia	Haptophyta	Haptophyta_Clade_HAP3	Haptophyta_Clade_HAP3_X	Haptophyta_Clade_HAP3_XX	Haptophyta_Clade_HAP3_XXX	Haptophyta_Clade_HAP3_XXX_sp.
ASV_474	0	0	0	0	0	0	0	0	0	0	0	210	0.938031645	Eukaryota	Alveolata	Dinoflagellata	Dinophyceae	Dinophyceae_X	Dinophyceae_XX	Dinophyceae_XXX	Dinophyceae_XXX_sp.
ASV_475	0	0	0	0	0	208	0	0	0	0	0	0	0.755354423	Eukaryota	Stramenopiles	Ochrophyta	Bacillariophyta	Bacillariophyta_X	Polar-centric-Mediophyceae	Chaetoceros
ASV_477	117	73	4	9	0	2	0	0	0	0	0	0	0.99854996	Eukaryota	Alveolata	Dinoflagellata	Syndiniales	Dino-Group-II	Dino-Group-II-Clade-3	Dino-Group-II-Clade-3_X	Dino-Group-II-Clade-3_X_sp.
ASV_478	181	0	0	24	0	0	0	0	0	0	0	0	0.933760225	Eukaryota	Alveolata	Dinoflagellata	Syndiniales	Dino-Group-II	Dino-Group-II_X	Dino-Group-II_XX	Dino-Group-II_XX_sp.
ASV_479	0	0	0	2	0	10	0	24	2	1	8	0	0.999793271	Eukaryota	Stramenopiles	Ochrophyta	Bacillariophyta	Bacillariophyta_X	Radial-centric-basal-Coscinodiscophyceae	Corethron	Corethron_inerme
ASV_480	2	149	4	0	0	0	5	8	20	0	7	7	0.871218456	Eukaryota	Alveolata	Dinoflagellata	Syndiniales	Dino-Group-II	Dino-Group-II-Clade-10-and-11	Dino-Group-II-Clade-10-and-11_X	Dino-Group-II-Clade-10-and-11_X_sp.
ASV_481	0	0	1	0	0	75	21	96	6	0	0	0	0.995806641	Eukaryota	Stramenopiles	Ochrophyta	Bacillariophyta	Bacillariophyta_X	Raphid-pennate
ASV_482	0	6	85	23	0	0	5	49	7	0	20	8	0.984674783	Eukaryota	Stramenopiles	Opalozoa	Bicoecea	Anoecales	Cafeteriaceae	Pseudobodo	Pseudobodo_sp.
ASV_483	0	34	0	0	0	0	14	146	9	0	0	0	0.973600336	Eukaryota	Alveolata	Ciliophora	Spirotrichea	Strombidiida	Strombidiidae_Q	Strombidiidae_Q_X	Strombidiidae_Q_X_sp.
ASV_484	11	67	27	0	0	0	5	26	20	0	8	38	0.929552804	Eukaryota	Opisthokonta	Fungi
ASV_485	0	202	0	0	0	0	0	0	0	0	0	0	0.981144719	Eukaryota	Rhizaria	Radiolaria	Polycystinea	Collodaria	Sphaerozoidae
ASV_486	0	0	50	152	0	0	0	0	0	0	0	0	1	Eukaryota
ASV_487	155	46	0	0	0	0	0	0	0	0	0	0	1	Eukaryota	Alveolata	Dinoflagellata	Dinophyceae
ASV_488	152	13	20	16	0	0	0	0	0	0	0	0	0.999995502	Eukaryota	Alveolata	Dinoflagellata	Syndiniales	Dino-Group-II	Dino-Group-II-Clade-10-and-11	Dino-Group-II-Clade-10-and-11_X	Dino-Group-II-Clade-10-and-11_X_sp.
ASV_489	0	0	0	0	0	0	0	0	0	0	0	201	0.999999799	Eukaryota	Rhizaria	Radiolaria	RAD-B	RAD-B_X	RAD-B-Group-IV	Spumellarian	Spumellarian_radiolarian
ASV_490	16	69	9	15	8	14	0	23	46	0	0	0	0.998244026	Eukaryota	Stramenopiles	Ochrophyta	Pelagophyceae	Pelagomonadales	Pelagomonadaceae	Pelagomonadaceae_clade_A	Pelagomonadaceae_clade_A_sp.
ASV_491	0	0	0	0	0	200	0	0	0	0	0	0	0.999940275	Eukaryota	Stramenopiles	Ochrophyta	Bacillariophyta	Bacillariophyta_X	Polar-centric-Mediophyceae
ASV_492	43	78	13	65	0	0	0	0	0	0	0	0	0.930597273	Eukaryota	Hacrobia	Haptophyta	Prymnesiophyceae	Prymnesiales	Chrysochromulinaceae	Chrysochromulina
ASV_493	0	0	0	0	0	0	76	13	5	3	2	71	0.845263934	Eukaryota	Stramenopiles	Ochrophyta	Bacillariophyta	Bacillariophyta_X	Raphid-pennate	Navicula
ASV_494	0	0	0	0	4	0	19	72	57	8	12	8	0.999998898	Eukaryota	Alveolata	Dinoflagellata	Syndiniales	Dino-Group-I	Dino-Group-I-Clade-4	Dino-Group-I-Clade-4_X	Dino-Group-I-Clade-4_X_sp.
ASV_495	6	165	25	0	0	0	0	0	0	0	0	0	1	Eukaryota
ASV_496	11	102	0	0	77	3	0	0	3	0	0	0	1	Eukaryota	Alveolata	Dinoflagellata	Syndiniales	Dino-Group-II	Dino-Group-II-Clade-32	Dino-Group-II-Clade-32_X	Dino-Group-II-Clade-32_X_sp.
ASV_497	14	105	20	0	0	0	9	5	29	0	4	5	0.999999959	Eukaryota	Stramenopiles	Ochrophyta	Bolidophyceae	Parmales	Triparmaceae	Triparma
ASV_498	49	92	10	39	1	4	0	0	0	0	0	0	0.911549405	Eukaryota	Alveolata	Dinoflagellata	Dinophyceae	Dinophyceae_X	Dinophyceae_XX	Dinophyceae_XXX	Dinophyceae_XXX_sp.
ASV_499	78	76	0	41	0	0	0	0	0	0	0	0	0.827075351	Eukaryota	Alveolata	Dinoflagellata	Syndiniales	Dino-Group-II	Dino-Group-II-Clade-1	Dino-Group-II-Clade-1_X	Dino-Group-II-Clade-1_X_sp.
ASV_500	7	180	2	6	0	0	0	0	0	0	0	0	0.969035858	Eukaryota	Alveolata	Dinoflagellata	Dinophyceae
ASV_502	0	106	79	9	0	0	0	0	0	0	0	0	0.893461672	Eukaryota	Alveolata	Dinoflagellata	Dinophyceae
ASV_504	0	0	0	0	0	0	0	0	0	0	0	191	1	Eukaryota	Alveolata	Dinoflagellata	Dinophyceae
ASV_505	0	0	0	0	112	79	0	0	0	0	0	0	0.955767249	Eukaryota	Alveolata	Dinoflagellata	Dinophyceae	Dinophyceae_X	Dinophyceae_XX	Dinophyceae_XXX	Dinophyceae_XXX_sp.
ASV_506	0	0	0	0	0	0	0	28	35	2	33	90	1	Eukaryota	Stramenopiles	Pseudofungi	MAST-1	MAST-1B	MAST-1B_X	MAST-1B_XX	MAST-1B_XX_sp.
ASV_507	0	0	0	0	0	0	24	10	17	0	9	130	0.999999873	Eukaryota	Hacrobia	Cryptophyta	Cryptophyceae	Cryptomonadales	Cryptomonadales_X
ASV_508	68	49	48	25	0	0	0	0	0	0	0	0	0.999959623	Eukaryota	Alveolata	Dinoflagellata	Dinophyceae	Gymnodiniales	Gymnodiniaceae	Margalefidinium	Margalefidinium_fulvescens
ASV_509	97	67	0	25	0	0	0	0	0	0	0	0	0.992392004	Eukaryota	Alveolata	Dinoflagellata	Dinophyceae	Dinophyceae_X	Dinophyceae_XX	Dinophyceae_XXX	Dinophyceae_XXX_sp.
ASV_510	0	0	0	0	0	0	13	0	0	0	0	176	0.999997746	Eukaryota	Stramenopiles	Ochrophyta	Bacillariophyta	Bacillariophyta_X	Polar-centric-Mediophyceae
ASV_511	8	0	0	34	22	108	6	5	5	0	0	0	0.919430059	Eukaryota	Alveolata	Dinoflagellata	Dinophyceae	Dinophyceae_X	Dinophyceae_XX	Dinophyceae_XXX	Dinophyceae_XXX_sp.
ASV_512	0	0	0	0	0	0	50	75	0	0	5	20	0.740745342	Eukaryota	Stramenopiles	Ochrophyta	Bacillariophyta	Bacillariophyta_X	Raphid-pennate	Halamphora
ASV_513	14	14	110	49	0	0	0	0	0	0	0	0	0.965769687	Eukaryota	Alveolata	Dinoflagellata	Dinophyceae	Dinophyceae_X	Dinophyceae_XX	Dinophyceae_XXX	Dinophyceae_XXX_sp.
ASV_514	43	144	0	0	0	0	0	0	0	0	0	0	0.890154914	Eukaryota	Alveolata	Dinoflagellata	Dinophyceae
ASV_515	34	75	10	51	0	0	0	0	11	0	3	2	0.738319936	Eukaryota	Alveolata	Dinoflagellata	Syndiniales	Dino-Group-II	Dino-Group-II_X	Dino-Group-II_XX	Dino-Group-II_XX_sp.
ASV_516	0	0	186	0	0	0	0	0	0	0	0	0	0.747577604	Eukaryota	Alveolata	Dinoflagellata	Dinophyceae	Dinophyceae_X	Dinophyceae_XX	Dinophyceae_XXX	Dinophyceae_XXX_sp.
ASV_517	0	12	5	3	2	4	19	13	74	0	15	31	0.84291762	Eukaryota	Stramenopiles	Pseudofungi	MAST-2	MAST-2D	MAST-2D_X	MAST-2D_XX	MAST-2D_XX_sp.
ASV_518	7	26	30	112	8	1	0	0	0	0	0	0	0.712361766	Eukaryota	Alveolata	Dinoflagellata	Dinophyceae	Gymnodiniales	Chytriodiniaceae	Dissodinium	Dissodinium_pseudolunula
ASV_519	73	41	0	70	0	0	0	0	0	0	0	0	0.994216432	Eukaryota	Alveolata	Dinoflagellata	Dinophyceae	Dinophyceae_X	Dinophyceae_XX	Dinophyceae_XXX	Dinophyceae_XXX_sp.
ASV_520	0	184	0	0	0	0	0	0	0	0	0	0	0.865479769	Eukaryota	Rhizaria	Radiolaria	Polycystinea	Collodaria	Sphaerozoidae	Collozoum
ASV_521	0	3	0	0	0	0	4	106	25	7	11	6	0.978548398	Eukaryota	Rhizaria	Cercozoa	Filosa-Thecofilosea	Cryomonadida	Protaspa-lineage	Protaspa	Protaspa_grandis
ASV_522	65	45	21	52	0	0	0	0	0	0	0	0	0.999896235	Eukaryota	Rhizaria	Radiolaria	Acantharea	Arthracanthida-Symphyacanthida	Arthracanthida-Symphyacanthida_X
ASV_523	0	0	0	0	182	0	0	0	0	0	0	0	1	Eukaryota
ASV_524	11	152	5	9	0	0	0	4	0	0	0	0	1	Eukaryota	Alveolata	Dinoflagellata	Syndiniales	Dino-Group-II	Dino-Group-II-Clade-14	Dino-Group-II-Clade-14_X	Dino-Group-II-Clade-14_X_sp.
ASV_525	0	181	0	0	0	0	0	0	0	0	0	0	0.964260854	Eukaryota	Rhizaria	Radiolaria	Polycystinea	Collodaria	Sphaerozoidae
ASV_526	54	113	2	11	0	0	0	0	0	0	0	0	0.979459324	Eukaryota	Alveolata	Dinoflagellata	Syndiniales	Dino-Group-II	Dino-Group-II-Clade-10-and-11	Dino-Group-II-Clade-10-and-11_X	Dino-Group-II-Clade-10-and-11_X_sp.
ASV_527	9	159	3	9	0	0	0	0	0	0	0	0	0.999998344	Eukaryota	Hacrobia	Haptophyta	Haptophyta_Clade_HAP3	Haptophyta_Clade_HAP3_X	Haptophyta_Clade_HAP3_XX	Haptophyta_Clade_HAP3_XXX	Haptophyta_Clade_HAP3_XXX_sp.
ASV_530	23	33	13	7	0	0	3	28	44	0	23	2	0.998328982	Eukaryota	Hacrobia	Haptophyta	Prymnesiophyceae	Prymnesiales	Chrysochromulinaceae	Chrysochromulina
ASV_531	4	75	0	97	0	0	0	0	0	0	0	0	0.742051595	Eukaryota	Hacrobia	Haptophyta	Prymnesiophyceae	Zygodiscales	Pontosphaeraceae	Scyphosphaera	Scyphosphaera_apsteinii
ASV_532	55	81	5	35	0	0	0	0	0	0	0	0	0.93328921	Eukaryota	Alveolata	Dinoflagellata	Dinophyceae	Dinophyceae_X	Dinophyceae_XX	Dinophyceae_XXX	Dinophyceae_XXX_sp.
ASV_533	0	2	16	48	0	79	12	4	0	0	0	6	0.999993068	Eukaryota	Stramenopiles	Ochrophyta	Bacillariophyta	Bacillariophyta_X	Polar-centric-Mediophyceae	Chaetoceros
ASV_534	0	0	0	107	0	61	0	0	0	8	0	0	0.779020193	Eukaryota	Alveolata	Dinoflagellata	Dinophyceae	Dinophyceae_X	Dinophyceae_XX	Dinophyceae_XXX	Dinophyceae_XXX_sp.
ASV_536	0	0	0	0	0	0	0	22	128	0	24	0	0.999380391	Eukaryota	Stramenopiles	Ochrophyta	Pelagophyceae	Pelagomonadales	Pelagomonadaceae	Pelagomonas	Pelagomonas_calceolata
ASV_537	117	51	0	6	0	0	0	0	0	0	0	0	0.798485192	Eukaryota	Hacrobia	Telonemia	Telonemia_X	Telonemia_XX	Telonemia-Group-2	Telonema-Group-2	Telonema_antarcticum
ASV_538	28	3	1	142	0	0	0	0	0	0	0	0	0.999989553	Eukaryota	Alveolata	Dinoflagellata	Syndiniales	Dino-Group-I	Dino-Group-I-Clade-1	Dino-Group-I-Clade-1_X	Dino-Group-I-Clade-1_X_sp.
ASV_539	30	111	6	27	0	0	0	0	0	0	0	0	0.906217465	Eukaryota	Alveolata	Dinoflagellata	Dinophyceae
ASV_540	22	89	52	11	0	0	0	0	0	0	0	0	0.970252708	Eukaryota	Alveolata	Dinoflagellata	Dinophyceae
ASV_541	0	0	0	174	0	0	0	0	0	0	0	0	1	Eukaryota
ASV_542	110	49	0	14	0	0	0	0	0	0	0	0	0.999444103	Eukaryota	Alveolata	Dinoflagellata	Syndiniales	Dino-Group-II	Dino-Group-II-Clade-10-and-11	Dino-Group-II-Clade-10-and-11_X	Dino-Group-II-Clade-10-and-11_X_sp.
ASV_543	173	0	0	0	0	0	0	0	0	0	0	0	0.936271715	Eukaryota	Alveolata	Dinoflagellata	Dinophyceae	Dinophyceae_X	Dinophyceae_XX	Dinophyceae_XXX	Dinophyceae_XXX_sp.
ASV_544	0	119	10	0	0	43	0	0	0	0	0	0	1	Eukaryota	Rhizaria	Radiolaria	RAD-B	RAD-B_X	RAD-B-Group-IV	Spumellarian	Spumellarian_radiolarian
ASV_545	24	115	17	0	1	2	3	8	2	0	0	0	0.99860863	Eukaryota	Stramenopiles	Sagenista	MAST-7	MAST-7B	MAST-7B_X	MAST-7B_XX	MAST-7B_XX_sp.
ASV_546	171	0	0	0	0	0	0	0	0	0	0	0	0.999507102	Eukaryota	Alveolata	Dinoflagellata	Dinophyceae	Dinophyceae_X	Dinophyceae_XX	Dinophyceae_XXX	Dinophyceae_XXX_sp.
ASV_547	73	69	0	12	2	13	0	1	0	0	0	0	0.911015263	Eukaryota	Alveolata	Ciliophora	Spirotrichea	Strombidiida
ASV_548	29	114	0	21	0	3	0	0	0	0	0	0	0.920379897	Eukaryota	Alveolata	Dinoflagellata	Syndiniales	Dino-Group-I	Dino-Group-I-Clade-5	Dino-Group-I-Clade-5_X	Dino-Group-I-Clade-5_X_sp.
ASV_549	12	130	25	0	0	0	0	0	0	0	0	0	0.962447677	Eukaryota	Alveolata	Dinoflagellata	Syndiniales	Dino-Group-I	Dino-Group-I-Clade-5	Dino-Group-I-Clade-5_X	Dino-Group-I-Clade-5_X_sp.
ASV_550	0	0	167	0	0	0	0	0	0	0	0	0	0.97955317	Eukaryota	Alveolata	Dinoflagellata	Dinophyceae	Dinophyceae_X	Dinophyceae_XX	Dinophyceae_XXX	Dinophyceae_XXX_sp.
ASV_551	13	75	0	0	69	9	0	0	0	0	0	0	0.999416653	Eukaryota	Stramenopiles	Ochrophyta	Bacillariophyta	Bacillariophyta_X	Raphid-pennate
ASV_552	7	17	8	134	0	0	0	0	0	0	0	0	0.999991932	Eukaryota	Alveolata	Dinoflagellata	Syndiniales	Dino-Group-II	Dino-Group-II-Clade-10-and-11	Dino-Group-II-Clade-10-and-11_X	Dino-Group-II-Clade-10-and-11_X_sp.
ASV_553	0	0	0	0	0	2	0	12	20	7	90	34	0.999997083	Eukaryota	Stramenopiles	Ochrophyta	Dictyochophyceae	Dictyochophyceae_X	Dictyochales	Dictyocha
ASV_554	14	63	78	0	10	0	0	0	0	0	0	0	0.951362295	Eukaryota	Alveolata	Dinoflagellata	Dinophyceae	Dinophyceae_X	Dinophyceae_XX	Dinophyceae_XXX	Dinophyceae_XXX_sp.
ASV_555	68	50	0	45	0	0	0	0	0	0	0	0	0.832278341	Eukaryota	Alveolata	Dinoflagellata	Dinophyceae	Dinophyceae_X	Dinophyceae_XX	Dinophyceae_XXX	Dinophyceae_XXX_sp.
ASV_556	0	0	0	0	0	0	0	0	0	0	162	0	0.864611056	Eukaryota	Hacrobia	Haptophyta	Prymnesiophyceae	Phaeocystales	Phaeocystaceae	Phaeocystis	Phaeocystis_jahnii
ASV_558	10	131	2	0	0	7	0	0	8	0	1	3	0.993187189	Eukaryota	Hacrobia	Katablepharidophyta	Katablepharidaceae	Katablepharidales	Katablepharidales_X	Leucocryptos	Leucocryptos_sp.
ASV_559	83	14	3	60	2	0	0	0	0	0	0	0	0.910222351	Eukaryota	Rhizaria	Radiolaria	Acantharea	Arthracanthida-Symphyacanthida	Arthracanthida-Symphyacanthida_X	Phractopelta	Phractopelta_sarmentosa
ASV_560	10	68	0	84	0	0	0	0	0	0	0	0	0.999999172	Eukaryota	Alveolata	Dinoflagellata	Syndiniales	Dino-Group-I	Dino-Group-I-Clade-4	Dino-Group-I-Clade-4_X	Dino-Group-I-Clade-4_X_sp.
ASV_561	51	20	0	91	0	0	0	0	0	0	0	0	0.850631315	Eukaryota	Opisthokonta	Fungi	Chytridiomycota	Chytridiomycotina	Chytridiomycetes	Aphelidium	Aphelidium_sp.
ASV_562	0	0	0	16	86	56	0	0	0	0	0	0	0.990121048	Eukaryota	Alveolata	Dinoflagellata	Dinophyceae	Dinophyceae_X	Dinophyceae_XX	Dinophyceae_XXX	Dinophyceae_XXX_sp.
ASV_563	0	0	0	160	0	0	0	0	0	0	0	0	0.798269857	Eukaryota	Alveolata	Dinoflagellata	Syndiniales	Dino-Group-II
ASV_564	50	24	0	85	0	0	0	0	0	0	0	0	0.999773153	Eukaryota	Alveolata	Dinoflagellata	Syndiniales	Dino-Group-II	Dino-Group-II-Clade-10-and-11	Dino-Group-II-Clade-10-and-11_X	Dino-Group-II-Clade-10-and-11_X_sp.
ASV_565	0	0	0	159	0	0	0	0	0	0	0	0	0.997819841	Eukaryota	Alveolata	Dinoflagellata	Dinophyceae	Dinophyceae_X	Dinophyceae_XX	Dinophyceae_XXX	Dinophyceae_XXX_sp.
ASV_566	53	57	21	24	3	0	0	0	0	0	0	0	0.982796522	Eukaryota	Hacrobia	Haptophyta	Prymnesiophyceae	Phaeocystales	Phaeocystaceae	Phaeocystis	Phaeocystis_jahnii
ASV_567	0	0	0	0	0	158	0	0	0	0	0	0	0.999999283	Eukaryota	Alveolata	Dinoflagellata	Syndiniales	Dino-Group-I	Dino-Group-I-Clade-1	Dino-Group-I-Clade-1_X	Dino-Group-I-Clade-1_X_sp.
ASV_568	0	0	0	158	0	0	0	0	0	0	0	0	0.994377197	Eukaryota	Alveolata	Dinoflagellata	Dinophyceae	Dinophyceae_X	Dinophyceae_XX	Dinophyceae_XXX	Dinophyceae_XXX_sp.
ASV_569	41	63	35	18	0	0	0	0	0	0	0	0	1	Eukaryota	Alveolata	Dinoflagellata	Dinophyceae
ASV_570	0	0	0	0	0	0	3	37	48	0	4	55	0.999611456	Eukaryota	Stramenopiles	Ochrophyta	Bolidophyceae	Parmales	Parmales_X	Parmales_XX	Parmales_XX_sp.
ASV_571	0	0	0	0	0	0	4	52	55	0	18	26	0.873001076	Eukaryota	Alveolata	Dinoflagellata	Dinophyceae	Dinophyceae_X	Dinophyceae_XX	Dinophyceae_XXX	Dinophyceae_XXX_sp.
ASV_573	7	121	5	20	0	0	0	0	0	0	0	0	0.805610346	Eukaryota	Alveolata	Dinoflagellata	Syndiniales	Dino-Group-II	Dino-Group-II-Clade-10-and-11	Dino-Group-II-Clade-10-and-11_X	Dino-Group-II-Clade-10-and-11_X_sp.
ASV_574	89	59	4	0	0	0	0	0	0	0	0	0	0.848040682	Eukaryota	Alveolata	Dinoflagellata	Dinophyceae
ASV_575	38	21	0	17	0	76	0	0	0	0	0	0	0.90115113	Eukaryota	Alveolata	Dinoflagellata	Syndiniales	Dino-Group-II	Dino-Group-II-Clade-2	Dino-Group-II-Clade-2_X	Dino-Group-II-Clade-2_X_sp.
ASV_576	0	0	0	0	8	0	7	10	74	0	0	53	0.990150834	Eukaryota	Alveolata	Dinoflagellata	Dinophyceae	Dinophyceae_X	Dinophyceae_XX	Dinophyceae_XXX	Dinophyceae_XXX_sp.
ASV_577	152	0	0	0	0	0	0	0	0	0	0	0	0.96793549	Eukaryota	Alveolata	Dinoflagellata	Dinophyceae	Dinophyceae_X	Dinophyceae_XX	Dinophyceae_XXX	Dinophyceae_XXX_sp.
ASV_578	0	143	8	0	0	0	0	0	0	0	0	0	0.999658619	Eukaryota	Hacrobia	Telonemia	Telonemia_X	Telonemia_XX	Telonemia-Group-2	Telonema-Group-2	Telonema_antarcticum
ASV_579	0	0	0	0	0	1	0	13	69	0	20	39	0.999978503	Eukaryota	Stramenopiles
ASV_580	34	116	0	0	0	0	0	0	0	0	0	0	0.741612113	Eukaryota	Alveolata	Dinoflagellata	Syndiniales	Dino-Group-II	Dino-Group-II_X	Dino-Group-II_XX	Dino-Group-II_XX_sp.
ASV_581	0	0	0	0	0	0	8	102	9	24	6	0	0.990199894	Eukaryota	Alveolata	Dinoflagellata	Dinophyceae	Dinophyceae_X	Dinophyceae_XX	Dinophyceae_XXX	Dinophyceae_XXX_sp.
ASV_582	40	85	2	22	0	0	0	0	0	0	0	0	0.999999912	Eukaryota	Hacrobia	Haptophyta	Haptophyta_Clade_HAP2	Haptophyta_Clade_HAP2_X	Haptophyta_Clade_HAP2_XX	Haptophyta_Clade_HAP2_XXX	Haptophyta_Clade_HAP2_XXX_sp.
ASV_583	8	107	17	0	0	17	0	0	0	0	0	0	0.911990801	Eukaryota	Stramenopiles
ASV_584	79	57	0	13	0	0	0	0	0	0	0	0	0.982501926	Eukaryota	Alveolata	Dinoflagellata	Dinophyceae	Dinophyceae_X	Dinophyceae_XX	Dinophyceae_XXX	Dinophyceae_XXX_sp.
ASV_585	11	113	24	0	0	0	0	0	0	0	0	0	1	Eukaryota	Alveolata	Dinoflagellata	Dinophyceae
ASV_586	0	0	0	1	0	0	0	43	0	20	0	11	0.949406844	Eukaryota	Alveolata	Dinoflagellata	Dinophyceae	Dinophyceae_X	Dinophyceae_XX	Dinophyceae_XXX	Dinophyceae_XXX_sp.
ASV_587	0	0	2	0	64	82	0	0	0	0	0	0	0.998994371	Eukaryota	Alveolata	Dinoflagellata	Syndiniales	Dino-Group-II	Dino-Group-II-Clade-10-and-11	Dino-Group-II-Clade-10-and-11_X	Dino-Group-II-Clade-10-and-11_X_sp.
ASV_588	0	146	0	0	0	0	0	0	0	0	0	0	0.99944638	Eukaryota	Hacrobia	Haptophyta	Haptophyta_Clade_HAP5	Haptophyta_Clade_HAP5_X	Haptophyta_Clade_HAP5_XX	Haptophyta_Clade_HAP5_XXX	Haptophyta_Clade_HAP5_XXX_sp.
ASV_589	6	81	0	58	0	0	0	0	0	0	0	0	0.834088896	Eukaryota	Alveolata	Dinoflagellata	Dinophyceae	Dinophyceae_X	Dinophyceae_XX	Dinophyceae_XXX	Dinophyceae_XXX_sp.
ASV_590	27	81	20	16	0	0	0	0	0	0	0	0	0.952293582	Eukaryota	Hacrobia	Haptophyta	Prymnesiophyceae	Prymnesiales	Chrysochromulinaceae	Chrysochromulina
ASV_591	72	61	0	8	0	0	0	0	0	0	0	2	0.999968784	Eukaryota	Hacrobia	Haptophyta	Prymnesiophyceae
ASV_592	52	41	9	41	0	0	0	0	0	0	0	0	0.963800304	Eukaryota	Opisthokonta
ASV_593	0	0	0	0	0	0	102	0	0	0	0	41	0.701388247	Eukaryota	Stramenopiles	Ochrophyta	Bacillariophyta	Bacillariophyta_X	Polar-centric-Mediophyceae	Thalassiosira	Thalassiosira_delicatula
ASV_594	0	0	0	0	0	0	21	14	42	0	14	51	0.999999834	Eukaryota	Hacrobia	Haptophyta	Prymnesiophyceae
ASV_595	0	142	0	0	0	0	0	0	0	0	0	0	0.83779212	Eukaryota	Alveolata	Dinoflagellata	Dinophyceae	Dinophyceae_X	Dinophyceae_XX	Dinophyceae_XXX	Dinophyceae_XXX_sp.
ASV_596	0	110	19	13	0	0	0	0	0	0	0	0	0.999994068	Eukaryota	Alveolata	Ciliophora	Spirotrichea	Strombidiida	Tontoniidae_B	Pseudotontonia	Pseudotontonia_simplicidens
ASV_597	0	0	0	142	0	0	0	0	0	0	0	0	1	Eukaryota
ASV_598	0	88	53	0	0	0	0	0	0	0	0	0	0.999602039	Eukaryota	Alveolata	Dinoflagellata	Syndiniales	Dino-Group-II	Dino-Group-II-Clade-6	Dino-Group-II-Clade-6_X	Dino-Group-II-Clade-6_X_sp.
ASV_599	0	0	0	0	0	0	14	23	84	1	2	11	0.826767157	Eukaryota	Hacrobia	Haptophyta	Prymnesiophyceae	Prymnesiales
ASV_600	57	80	0	0	3	0	0	0	0	0	0	0	1	Eukaryota	Alveolata	Dinoflagellata	Syndiniales	Dino-Group-II	Dino-Group-II-Clade-1	Dino-Group-II-Clade-1_X	Dino-Group-II-Clade-1_X_sp.
ASV_601	31	17	4	0	48	39	0	0	0	0	0	0	0.999999678	Eukaryota	Alveolata	Dinoflagellata	Syndiniales	Dino-Group-I	Dino-Group-I-Clade-4	Dino-Group-I-Clade-4_X	Dino-Group-I-Clade-4_X_sp.
ASV_602	55	39	0	45	0	0	0	0	0	0	0	0	0.999985613	Eukaryota	Hacrobia	Picozoa	Picozoa_X	Picozoa_XX	Picozoa_XXX	Picomonas	Picomonas_judraskeda
ASV_603	0	0	0	0	0	0	0	0	139	0	0	0	0.997068474	Eukaryota	Alveolata	Dinoflagellata	Dinophyceae	Dinophyceae_X	Dinophyceae_XX	Dinophyceae_XXX	Dinophyceae_XXX_sp.
ASV_604	11	127	0	0	0	0	0	0	0	0	0	0	0.741559798	Eukaryota	Alveolata	Dinoflagellata
ASV_605	79	21	13	23	0	0	0	0	0	0	0	1	1	Eukaryota	Alveolata	Dinoflagellata	Syndiniales	Dino-Group-II	Dino-Group-II-Clade-1	Dino-Group-II-Clade-1_X	Dino-Group-II-Clade-1_X_sp.
ASV_606	28	48	32	25	0	4	0	0	0	0	0	0	1	Eukaryota	Alveolata	Dinoflagellata	Dinophyceae
ASV_607	53	84	0	0	0	0	0	0	0	0	0	0	0.95508311	Eukaryota	Alveolata	Dinoflagellata	Syndiniales	Dino-Group-II	Dino-Group-II-Clade-10-and-11	Dino-Group-II-Clade-10-and-11_X	Dino-Group-II-Clade-10-and-11_X_sp.
ASV_608	0	0	0	0	3	7	27	0	68	1	10	0	0.865062788	Eukaryota	Opisthokonta	Fungi
ASV_609	7	39	0	90	0	0	0	0	0	0	0	0	1	Eukaryota	Alveolata	Dinoflagellata	Syndiniales	Dino-Group-II	Dino-Group-II-Clade-17	Dino-Group-II-Clade-17_X	Dino-Group-II-Clade-17_X_sp.
ASV_610	0	0	0	0	0	135	0	0	0	0	0	0	1	Eukaryota
ASV_611	0	134	0	0	0	0	0	0	0	0	0	0	1	Eukaryota	Stramenopiles	Ochrophyta	MOCH-2	MOCH-2_X	MOCH-2_XX	MOCH-2_XXX	MOCH-2_XXX_sp.
ASV_612	41	51	1	26	2	13	0	0	0	0	0	0	0.980952095	Eukaryota	Alveolata	Dinoflagellata	Dinophyceae	Gymnodiniales	Gymnodiniaceae	Margalefidinium	Margalefidinium_fulvescens
ASV_613	0	134	0	0	0	0	0	0	0	0	0	0	0.785788264	Eukaryota	Alveolata	Dinoflagellata	Dinophyceae	Dinophyceae_X	Dinophyceae_XX	Dinophyceae_XXX	Dinophyceae_XXX_sp.
ASV_614	7	25	0	6	1	95	0	0	0	0	0	0	0.99590604	Eukaryota	Alveolata	Dinoflagellata	Dinophyceae	Dinophyceae_X	Dinophyceae_XX	Dinophyceae_XXX	Dinophyceae_XXX_sp.
ASV_615	84	22	0	27	1	0	0	0	0	0	0	0	0.941508699	Eukaryota	Alveolata	Dinoflagellata	Dinophyceae	Dinophyceae_X	Dinophyceae_XX	Dinophyceae_XXX	Dinophyceae_XXX_sp.
ASV_616	105	20	0	9	0	0	0	0	0	0	0	0	0.999908878	Eukaryota	Alveolata	Dinoflagellata	Syndiniales	Dino-Group-II	Dino-Group-II-Clade-14	Dino-Group-II-Clade-14_X	Dino-Group-II-Clade-14_X_sp.
ASV_617	5	84	11	34	0	0	0	0	0	0	0	0	0.992475039	Eukaryota	Hacrobia	Katablepharidophyta	Katablepharidaceae	Katablepharidales	Katablepharidales_X	Leucocryptos	Leucocryptos_sp.
ASV_618	0	133	0	0	0	0	0	0	0	0	0	0	0.90232997	Eukaryota	Alveolata	Dinoflagellata	Dinophyceae	Gymnodiniales	Chytriodiniaceae	Dissodinium	Dissodinium_pseudolunula
ASV_619	0	0	0	0	0	0	8	37	88	0	0	0	0.710730562	Eukaryota	Alveolata	Dinoflagellata	Syndiniales	Dino-Group-II	Dino-Group-II-Clade-10-and-11	Dino-Group-II-Clade-10-and-11_X	Dino-Group-II-Clade-10-and-11_X_sp.
ASV_620	0	0	133	0	0	0	0	0	0	0	0	0	0.722306471	Eukaryota	Hacrobia	Haptophyta	Prymnesiophyceae	Zygodiscales
ASV_621	22	67	8	4	11	19	0	1	0	0	0	0	0.999999876	Eukaryota	Stramenopiles	Sagenista	MAST-9	MAST-9A	MAST-9A_X	MAST-9A_XX	MAST-9A_XX_sp.
ASV_622	0	0	0	0	0	0	0	0	6	6	81	38	0.986745575	Eukaryota	Hacrobia	Haptophyta	Prymnesiophyceae	Prymnesiales	Prymnesiaceae
ASV_623	15	16	10	88	0	2	0	0	0	0	0	0	0.99950233	Eukaryota	Alveolata	Dinoflagellata	Syndiniales	Dino-Group-II	Dino-Group-II-Clade-10-and-11	Dino-Group-II-Clade-10-and-11_X	Dino-Group-II-Clade-10-and-11_X_sp.
ASV_624	0	0	0	131	0	0	0	0	0	0	0	0	0.995517459	Eukaryota	Stramenopiles	Sagenista	MAST-4	MAST-4F	MAST-4F_X	MAST-4F_XX	MAST-4F_XX_sp.
ASV_625	0	0	0	131	0	0	0	0	0	0	0	0	1	Eukaryota	Alveolata	Dinoflagellata	Dinophyceae
ASV_626	19	66	0	37	0	6	0	2	0	0	0	0	0.937518979	Eukaryota	Hacrobia	Haptophyta	Prymnesiophyceae	Calcihaptophycidae	Rhabdosphaeraceae	Algirosphaera	Algirosphaera_robusta
ASV_627	38	67	0	25	0	0	0	0	0	0	0	0	0.996484494	Eukaryota	Hacrobia	Haptophyta	Haptophyta_Clade_HAP4	Haptophyta_Clade_HAP4_X	Haptophyta_Clade_HAP4_XX	Haptophyta_Clade_HAP4_XXX	Haptophyta_Clade_HAP4_XXX_sp.
ASV_628	22	56	13	39	0	0	0	0	0	0	0	0	0.940322167	Eukaryota	Alveolata	Dinoflagellata	Dinophyceae	Dinophyceae_X	Dinophyceae_XX	Dinophyceae_XXX	Dinophyceae_XXX_sp.
ASV_629	0	130	0	0	0	0	0	0	0	0	0	0	0.912384718	Eukaryota	Alveolata	Dinoflagellata	Dinophyceae
ASV_630	73	44	0	13	0	0	0	0	0	0	0	0	0.784757948	Eukaryota	Alveolata	Dinoflagellata	Dinophyceae	Prorocentrales	Prorocentraceae	Prorocentrum	Prorocentrum_sp.
ASV_631	32	0	31	67	0	0	0	0	0	0	0	0	0.910546829	Eukaryota	Alveolata	Dinoflagellata	Dinophyceae	Dinophyceae_X	Dinophyceae_XX	Dinophyceae_XXX	Dinophyceae_XXX_sp.
ASV_632	0	0	0	0	0	129	0	0	0	0	0	0	0.999999536	Eukaryota	Alveolata	Dinoflagellata	Dinophyceae	Gonyaulacales	Ceratiaceae	Tripos
ASV_633	0	0	0	0	0	0	0	5	52	4	37	20	0.999796617	Eukaryota	Stramenopiles
ASV_634	0	0	0	0	0	0	0	0	18	2	30	77	0.781201983	Eukaryota	Opisthokonta	Fungi	Chytridiomycota	Chytridiomycotina	Chytridiomycetes	Aphelidium	Aphelidium_sp.
ASV_635	0	0	0	0	0	0	2	0	67	0	3	50	0.981582902	Eukaryota	Stramenopiles	Opalozoa	MAST-3	MAST-3_X	MAST-3_XX	MAST-3_XXX	MAST-3_XXX_sp.
ASV_636	23	105	0	0	0	0	0	0	0	0	0	0	0.999572176	Eukaryota	Opisthokonta	Choanoflagellida	Choanoflagellatea	Acanthoecida	Stephanoecidae_Group_E	Stephanoecidae_Group_E_X	Stephanoecidae_Group_E_X_sp.
ASV_637	53	57	8	10	0	0	0	0	0	0	0	0	0.998867935	Eukaryota	Hacrobia	Haptophyta	Prymnesiophyceae	Prymnesiales	Prymnesiophyceae_Clade_B4	Prymnesiophyceae_Clade_B4_X	Prymnesiophyceae_Clade_B4_X_sp.
ASV_638	100	10	4	14	0	0	0	0	0	0	0	0	0.999999999	Eukaryota	Alveolata	Dinoflagellata	Syndiniales	Dino-Group-II	Dino-Group-II-Clade-16	Dino-Group-II-Clade-16_X	Dino-Group-II-Clade-16_X_sp.
ASV_639	0	0	0	0	0	0	0	0	0	0	0	128	0.998847858	Eukaryota	Alveolata	Dinoflagellata	Dinophyceae	Dinophyceae_X	Dinophyceae_XX	Dinophyceae_XXX	Dinophyceae_XXX_sp.
ASV_640	0	0	0	0	0	0	7	63	14	0	0	41	0.9753131	Eukaryota	Stramenopiles	Ochrophyta	Dictyochophyceae	Dictyochophyceae_X	Pedinellales	Pedinella	Pedinella_sp.
ASV_641	0	0	0	128	0	0	0	0	0	0	0	0	0.883826224	Eukaryota	Stramenopiles
ASV_642	0	0	0	0	0	0	0	0	0	0	98	0	0.999996231	Eukaryota	Stramenopiles	Ochrophyta	Bacillariophyta	Bacillariophyta_X
ASV_643	0	127	0	0	0	0	0	0	0	0	0	0	0.954637132	Eukaryota	Alveolata	Dinoflagellata	Dinophyceae	Dinophyceae_X	Dinophyceae_XX	Dinophyceae_XXX	Dinophyceae_XXX_sp.
ASV_644	65	37	0	23	1	0	0	0	0	0	0	0	0.990123874	Eukaryota	Alveolata	Dinoflagellata	Dinophyceae	Dinophyceae_X	Dinophyceae_XX	Dinophyceae_XXX	Dinophyceae_XXX_sp.
ASV_645	0	0	0	0	2	0	15	109	0	0	0	0	0.997606765	Eukaryota	Stramenopiles	Sagenista	MAST-9	MAST-9A	MAST-9A_X	MAST-9A_XX	MAST-9A_XX_sp.
ASV_646	0	0	0	0	0	0	6	23	0	0	11	36	0.741215151	Eukaryota	Stramenopiles	Ochrophyta	Bacillariophyta	Bacillariophyta_X	Raphid-pennate	Halamphora
ASV_647	0	0	0	0	0	0	0	35	29	0	9	43	0.998666205	Eukaryota	Alveolata	Dinoflagellata	Dinophyceae	Dinophyceae_X	Dinophyceae_XX	Dinophyceae_XXX	Dinophyceae_XXX_sp.
ASV_648	0	0	0	0	0	0	10	50	17	0	3	0	0.970468249	Eukaryota	Alveolata	Dinoflagellata
ASV_649	3	67	44	10	0	0	0	0	0	0	0	0	0.993095876	Eukaryota	Stramenopiles	Opalozoa	MAST-3	MAST-3E	MAST-3E_X	MAST-3E_XX	MAST-3E_XX_sp.
ASV_650	33	91	0	0	0	0	0	0	0	0	0	0	0.999925819	Eukaryota	Hacrobia	Haptophyta	Prymnesiophyceae
ASV_651	8	10	0	38	23	30	0	0	5	0	0	0	0.987038632	Eukaryota	Alveolata	Dinoflagellata	Dinophyceae	Dinophyceae_X	Dinophyceae_XX	Dinophyceae_XXX	Dinophyceae_XXX_sp.
ASV_652	12	31	11	70	0	0	0	0	0	0	0	0	0.801347655	Eukaryota	Alveolata	Dinoflagellata	Dinophyceae	Gymnodiniales	Chytriodiniaceae	Dissodinium	Dissodinium_pseudolunula
ASV_653	0	24	100	0	0	0	0	0	0	0	0	0	0.770652885	Eukaryota	Alveolata	Dinoflagellata	Dinophyceae	Suessiales	Suessiaceae	Symbiodinium	Symbiodinium_goreaui
ASV_654	0	0	0	0	0	124	0	0	0	0	0	0	0.962425414	Eukaryota	Alveolata	Dinoflagellata	Dinophyceae	Dinophyceae_X	Dinophyceae_XX	Dinophyceae_XXX	Dinophyceae_XXX_sp.
ASV_655	124	0	0	0	0	0	0	0	0	0	0	0	0.860258224	Eukaryota	Opisthokonta	Fungi
ASV_656	41	0	0	83	0	0	0	0	0	0	0	0	0.999968703	Eukaryota	Alveolata	Dinoflagellata	Syndiniales	Dino-Group-II	Dino-Group-II-Clade-22	Dino-Group-II-Clade-22_X	Dino-Group-II-Clade-22_X_sp.
ASV_657	0	0	0	124	0	0	0	0	0	0	0	0	0.888532276	Eukaryota	Alveolata	Dinoflagellata	Dinophyceae	Gymnodiniales	Chytriodiniaceae	Dissodinium	Dissodinium_pseudolunula
ASV_658	0	0	0	0	0	0	123	0	0	0	0	0	0.99976803	Eukaryota	Stramenopiles	Ochrophyta	Bacillariophyta	Bacillariophyta_X	Radial-centric-basal-Coscinodiscophyceae	Actinocyclus	Actinocyclus_curvatulus
ASV_659	0	0	0	0	0	0	123	0	0	0	0	0	0.704643798	Eukaryota	Stramenopiles	Ochrophyta	Bacillariophyta	Bacillariophyta_X	Raphid-pennate	Pseudo-nitzschia
ASV_660	123	0	0	0	0	0	0	0	0	0	0	0	0.808989467	Eukaryota	Alveolata	Dinoflagellata	Dinophyceae	Gymnodiniales	Chytriodiniaceae	Dissodinium	Dissodinium_pseudolunula
ASV_661	5	116	1	0	0	0	0	0	0	0	0	0	0.98553351	Eukaryota	Hacrobia	Haptophyta	Haptophyta_Clade_HAP5	Haptophyta_Clade_HAP5_X	Haptophyta_Clade_HAP5_XX	Haptophyta_Clade_HAP5_XXX	Haptophyta_Clade_HAP5_XXX_sp.
ASV_662	0	106	12	4	0	0	0	0	0	0	0	0	0.987128321	Eukaryota	Opisthokonta	Fungi
ASV_663	0	3	5	65	1	12	15	9	0	0	0	2	0.847813724	Eukaryota	Stramenopiles	Ochrophyta	Bacillariophyta	Bacillariophyta_X	Polar-centric-Mediophyceae	Thalassiosira
ASV_664	52	38	32	0	0	0	0	0	0	0	0	0	0.998311202	Eukaryota	Hacrobia	Haptophyta	Prymnesiophyceae	Prymnesiales	Chrysochromulinaceae	Chrysochromulina
ASV_665	27	12	37	28	0	17	1	0	0	0	0	0	0.918247577	Eukaryota	Alveolata	Dinoflagellata	Dinophyceae	Dinophyceae_X	Dinophyceae_XX	Dinophyceae_XXX	Dinophyceae_XXX_sp.
ASV_666	0	39	0	45	0	38	0	0	0	0	0	0	0.730048448	Eukaryota	Alveolata	Dinoflagellata	Dinophyceae	Dinophysiales	Oxyphysiaceae	Phalachroma	Phalacroma_rotundatum
ASV_667	56	62	0	0	0	0	0	3	0	0	0	0	0.994867889	Eukaryota	Alveolata	Dinoflagellata	Dinophyceae	Dinophyceae_X	Dinophyceae_XX	Dinophyceae_XXX	Dinophyceae_XXX_sp.
ASV_668	0	62	4	28	0	0	5	7	10	0	0	3	0.998686868	Eukaryota	Hacrobia	Telonemia	Telonemia_X	Telonemia_XX	Telonemia-Group-2	Telonema-Group-2	Telonema_antarcticum
ASV_671	9	101	0	8	0	0	0	0	0	0	0	0	0.935237683	Eukaryota	Hacrobia	Haptophyta	Haptophyta_Clade_HAP4	Haptophyta_Clade_HAP4_X	Haptophyta_Clade_HAP4_XX	Haptophyta_Clade_HAP4_XXX	Haptophyta_Clade_HAP4_XXX_sp.
ASV_672	49	7	39	23	0	0	0	0	0	0	0	0	0.999979388	Eukaryota	Stramenopiles	Sagenista	MAST-9	MAST-9A	MAST-9A_X	MAST-9A_XX	MAST-9A_XX_sp.
ASV_673	43	75	0	0	0	0	0	0	0	0	0	0	0.776555083	Eukaryota	Alveolata	Dinoflagellata	Syndiniales	Dino-Group-II	Dino-Group-II_X	Dino-Group-II_XX	Dino-Group-II_XX_sp.
ASV_674	44	74	0	0	0	0	0	0	0	0	0	0	0.999545723	Eukaryota	Alveolata	Dinoflagellata	Syndiniales	Dino-Group-II	Dino-Group-II-Clade-10-and-11	Dino-Group-II-Clade-10-and-11_X	Dino-Group-II-Clade-10-and-11_X_sp.
ASV_675	41	77	0	0	0	0	0	0	0	0	0	0	0.921874669	Eukaryota	Archaeplastida	Chlorophyta	Prasino-Clade-9	Prasino-Clade-9_X	Prasino-Clade-9_XX	Prasino-Clade-9_XXX	Prasino-Clade-9_XXX_sp.
ASV_676	0	1	0	0	0	0	0	0	0	0	2	113	0.700222918	Eukaryota	Alveolata	Ciliophora	Spirotrichea	Choreotrichida
ASV_677	19	96	0	0	1	0	0	0	0	0	0	0	0.970822125	Eukaryota	Alveolata	Dinoflagellata	Syndiniales	Dino-Group-I	Dino-Group-I-Clade-1	Dino-Group-I-Clade-1_X	Dino-Group-I-Clade-1_X_sp.
ASV_678	28	55	0	29	0	3	0	0	0	0	0	1	0.982247276	Eukaryota	Alveolata	Dinoflagellata	Dinophyceae	Dinophyceae_X	Dinophyceae_XX	Dinophyceae_XXX	Dinophyceae_XXX_sp.
ASV_679	5	63	19	20	0	9	0	0	0	0	0	0	0.939689437	Eukaryota	Alveolata	Dinoflagellata	Dinophyceae	Dinophyceae_X	Dinophyceae_XX	Dinophyceae_XXX	Dinophyceae_XXX_sp.
ASV_680	22	19	21	53	1	0	0	0	0	0	0	0	0.962946111	Eukaryota	Alveolata	Dinoflagellata	Dinophyceae	Dinophyceae_X	Dinophyceae_XX	Dinophyceae_XXX	Dinophyceae_XXX_sp.
ASV_681	39	41	36	0	0	0	0	0	0	0	0	0	0.903622458	Eukaryota	Alveolata	Dinoflagellata	Syndiniales	Dino-Group-II	Dino-Group-II-Clade-3	Dino-Group-II-Clade-3_X	Dino-Group-II-Clade-3_X_sp.
ASV_682	0	0	0	0	0	0	0	0	26	0	0	90	0.924618503	Eukaryota	Alveolata	Dinoflagellata	Dinophyceae	Dinophyceae_X	Dinophyceae_XX	Dinophyceae_XXX	Dinophyceae_XXX_sp.
ASV_683	0	115	0	0	0	0	0	0	0	0	0	0	0.99703384	Eukaryota	Hacrobia	Haptophyta	Prymnesiophyceae	Prymnesiophyceae_X	Prymnesiophyceae_XX	Prymnesiophyceae_XXX	Prymnesiophyceae_XXX_sp.
ASV_684	44	52	0	19	0	0	0	0	0	0	0	0	0.881003369	Eukaryota	Stramenopiles	Opalozoa	MAST-3	MAST-3F	MAST-3F_X	MAST-3F_XX	MAST-3F_XX_sp.
ASV_685	31	57	21	0	0	6	0	0	0	0	0	0	0.99998145	Eukaryota	Alveolata	Dinoflagellata	Syndiniales	Dino-Group-II	Dino-Group-II-Clade-10-and-11	Dino-Group-II-Clade-10-and-11_X	Dino-Group-II-Clade-10-and-11_X_sp.
ASV_686	9	84	21	0	0	0	0	0	0	0	0	0	0.910176251	Eukaryota	Stramenopiles	Ochrophyta	Chrysophyceae	Chrysophyceae_X
ASV_687	17	43	54	0	0	0	0	0	0	0	0	0	0.968803277	Eukaryota	Alveolata	Dinoflagellata
ASV_688	29	12	15	58	0	0	0	0	0	0	0	0	0.797809748	Eukaryota	Alveolata	Dinoflagellata	Dinophyceae
ASV_689	0	0	0	114	0	0	0	0	0	0	0	0	0.765608867	Eukaryota	Alveolata	Dinoflagellata	Dinophyceae	Gymnodiniales	Chytriodiniaceae	Dissodinium	Dissodinium_pseudolunula
ASV_690	0	51	0	24	0	10	0	0	14	0	0	13	0.999959881	Eukaryota	Hacrobia	Haptophyta	Prymnesiophyceae	Prymnesiales	Prymnesiaceae	Dicrateria
ASV_691	0	0	0	0	0	0	10	59	43	0	0	0	0.989006777	Eukaryota	Alveolata	Dinoflagellata	Dinophyceae	Dinophyceae_X	Dinophyceae_XX	Dinophyceae_XXX	Dinophyceae_XXX_sp.
ASV_692	113	0	0	0	0	0	0	0	0	0	0	0	0.99338843	Eukaryota	Alveolata	Dinoflagellata	Dinophyceae	Dinophyceae_X	Dinophyceae_XX	Dinophyceae_XXX	Dinophyceae_XXX_sp.
ASV_693	10	33	4	0	0	0	2	16	23	0	24	0	0.755150864	Eukaryota	Stramenopiles	Ochrophyta	Dictyochophyceae	Dictyochophyceae_X	Florenciellales	Pseudochatonella	Pseudochatonella_sp.
ASV_694	19	80	0	13	0	0	0	0	0	0	0	0	0.999924936	Eukaryota	Hacrobia	Picozoa	Picozoa_X	Picozoa_XX	Picozoa_XXX	Picomonas	Picomonas_judraskeda
ASV_695	7	49	8	46	0	0	0	0	2	0	0	0	0.96848038	Eukaryota	Hacrobia	Haptophyta	Prymnesiophyceae	Prymnesiales	Chrysochromulinaceae	Chrysochromulina
ASV_696	10	57	9	36	0	0	0	0	0	0	0	0	0.795415125	Eukaryota	Alveolata	Dinoflagellata	Dinophyceae	Dinophysiales	Oxyphysiaceae	Phalachroma
ASV_697	70	42	0	0	0	0	0	0	0	0	0	0	0.89902412	Eukaryota	Alveolata	Dinoflagellata	Syndiniales	Dino-Group-II	Dino-Group-II-Clade-3	Dino-Group-II-Clade-3_X	Dino-Group-II-Clade-3_X_sp.
ASV_698	0	0	112	0	0	0	0	0	0	0	0	0	1	Eukaryota	Alveolata	Dinoflagellata	Syndiniales	Dino-Group-II	Dino-Group-II-Clade-1	Dino-Group-II-Clade-1_X	Dino-Group-II-Clade-1_X_sp.
ASV_699	0	0	0	0	0	2	3	11	25	0	45	6	0.981116549	Eukaryota	Stramenopiles	Opalozoa	MAST-3	MAST-3E	MAST-3E_X	MAST-3E_XX	MAST-3E_XX_sp.
ASV_700	29	59	0	23	0	0	0	0	0	0	0	0	0.998543976	Eukaryota	Hacrobia	Haptophyta	Prymnesiophyceae	Prymnesiales	Chrysochromulinaceae	Chrysochromulina
ASV_701	0	0	111	0	0	0	0	0	0	0	0	0	0.983358506	Eukaryota	Alveolata	Dinoflagellata	Syndiniales	Dino-Group-I	Dino-Group-I-Clade-5	Dino-Group-I-Clade-5_X	Dino-Group-I-Clade-5_X_sp.
ASV_702	0	0	0	0	0	0	2	9	30	4	48	12	0.999929421	Eukaryota	Opisthokonta	Choanoflagellida	Choanoflagellatea	Acanthoecida	Stephanoecidae_Group_D	Acanthocorbis	Acanthocorbis_unguiculata
ASV_703	13	43	4	2	0	0	9	1	0	0	37	1	0.746024796	Eukaryota	Stramenopiles	Opalozoa	Bicoecea	Anoecales	Cafeteriaceae	Pseudobodo	Pseudobodo_sp.
ASV_704	0	79	11	20	0	0	0	0	0	0	0	0	0.983147228	Eukaryota	Alveolata	Dinoflagellata	Syndiniales	Dino-Group-I	Dino-Group-I-Clade-4	Dino-Group-I-Clade-4_X	Dino-Group-I-Clade-4_X_sp.
ASV_705	34	44	5	15	0	0	0	0	0	0	0	6	0.998025121	Eukaryota	Alveolata	Dinoflagellata	Syndiniales	Dino-Group-II	Dino-Group-II-Clade-12	Dino-Group-II-Clade-12_X	Dino-Group-II-Clade-12_X_sp.
ASV_706	0	95	13	1	0	0	0	0	0	0	0	0	0.999970644	Eukaryota	Hacrobia	Haptophyta	Haptophyta_Clade_HAP3	Haptophyta_Clade_HAP3_X	Haptophyta_Clade_HAP3_XX	Haptophyta_Clade_HAP3_XXX	Haptophyta_Clade_HAP3_XXX_sp.
ASV_707	2	48	0	1	23	34	0	0	0	0	0	0	0.999995489	Eukaryota	Alveolata	Dinoflagellata	Syndiniales	Dino-Group-I	Dino-Group-I-Clade-4	Dino-Group-I-Clade-4_X	Dino-Group-I-Clade-4_X_sp.
ASV_708	38	64	0	0	1	5	0	0	0	0	0	0	0.737934816	Eukaryota	Alveolata	Dinoflagellata	Dinophyceae	Gymnodiniales	Gymnodiniaceae	Margalefidinium	Margalefidinium_polykrikoides
ASV_709	0	0	0	83	24	1	0	0	0	0	0	0	0.724548115	Eukaryota	Alveolata	Dinoflagellata	Dinophyceae
ASV_711	0	0	0	108	0	0	0	0	0	0	0	0	0.777678549	Eukaryota	Alveolata	Dinoflagellata	Dinophyceae
ASV_712	0	107	0	0	0	0	0	0	0	0	0	0	1	Eukaryota	Alveolata	Dinoflagellata	Syndiniales	Dino-Group-II	Dino-Group-II-Clade-14	Dino-Group-II-Clade-14_X	Dino-Group-II-Clade-14_X_sp.
ASV_713	9	79	19	0	0	0	0	0	0	0	0	0	0.976474294	Eukaryota	Opisthokonta	Choanoflagellida	Choanoflagellatea	Acanthoecida	Stephanoecidae_Group_D	Acanthocorbis	Acanthocorbis_unguiculata
ASV_714	0	0	0	0	0	0	5	46	53	0	2	0	0.98717	Eukaryota	Hacrobia	Haptophyta	Prymnesiophyceae	Prymnesiales	Prymnesiaceae	Prymnesium
ASV_715	55	38	0	12	1	0	0	0	0	0	0	0	0.897194233	Eukaryota	Alveolata	Dinoflagellata
ASV_716	53	49	4	0	0	0	0	0	0	0	0	0	0.998988023	Eukaryota	Alveolata	Dinoflagellata	Syndiniales	Dino-Group-II	Dino-Group-II-Clade-10-and-11	Dino-Group-II-Clade-10-and-11_X	Dino-Group-II-Clade-10-and-11_X_sp.
ASV_717	44	61	1	0	0	0	0	0	0	0	0	0	0.716115938	Eukaryota	Opisthokonta	Fungi
ASV_718	0	0	0	0	0	106	0	0	0	0	0	0	0.974789184	Eukaryota	Alveolata	Dinoflagellata	Dinophyceae	Dinophyceae_X	Dinophyceae_XX	Dinophyceae_XXX	Dinophyceae_XXX_sp.
ASV_720	0	3	47	0	19	36	0	0	0	0	0	0	0.984267483	Eukaryota	Stramenopiles	Ochrophyta	Bacillariophyta	Bacillariophyta_X	Raphid-pennate
ASV_721	0	77	8	0	2	18	0	0	0	0	0	0	0.885469714	Eukaryota	Stramenopiles
ASV_722	0	80	25	0	0	0	0	0	0	0	0	0	0.999985084	Eukaryota	Opisthokonta	Choanoflagellida	Choanoflagellatea	Acanthoecida	Stephanoecidae_Group_H	Stephanoeca_Group_H	Stephanoeca_cauliculata
ASV_724	0	0	0	0	0	0	105	0	0	0	0	0	1	Eukaryota
ASV_725	0	0	0	0	0	105	0	0	0	0	0	0	0.772095392	Eukaryota	Stramenopiles	Ochrophyta	Bacillariophyta	Bacillariophyta_X	Raphid-pennate	Pseudo-nitzschia
ASV_726	56	0	0	49	0	0	0	0	0	0	0	0	0.999146418	Eukaryota	Alveolata	Dinoflagellata	Dinophyceae	Dinophyceae_X	Dinophyceae_XX	Dinophyceae_XXX	Dinophyceae_XXX_sp.
ASV_727	0	0	0	0	0	0	0	14	72	0	18	0	0.930470886	Eukaryota	Hacrobia	Telonemia	Telonemia_X	Telonemia_XX	Telonemia-Group-1	Telonema-Group-1	Telonema_sp.
ASV_728	13	45	9	37	0	0	0	0	0	0	0	0	1	Eukaryota	Alveolata	Dinoflagellata	Syndiniales	Dino-Group-II	Dino-Group-II-Clade-14	Dino-Group-II-Clade-14_X	Dino-Group-II-Clade-14_X_sp.
ASV_729	41	53	0	10	0	0	0	0	0	0	0	0	1	Eukaryota	Stramenopiles	Ochrophyta	Chrysophyceae	Chrysophyceae_X	Chrysophyceae_Clade-G	Chrysophyceae_Clade-G_X	Chrysophyceae_Clade-G_X_sp.
ASV_730	9	45	49	0	1	0	0	0	0	0	0	0	0.999988024	Eukaryota	Hacrobia	Picozoa	Picozoa_X	Picozoa_XX	Picozoa_XXX	Picomonas	Picomonas_judraskeda
ASV_731	17	34	0	53	0	0	0	0	0	0	0	0	0.942140905	Eukaryota	Alveolata	Dinoflagellata	Dinophyceae	Dinophyceae_X	Dinophyceae_XX	Dinophyceae_XXX	Dinophyceae_XXX_sp.
ASV_732	0	104	0	0	0	0	0	0	0	0	0	0	0.999999716	Eukaryota	Alveolata	Dinoflagellata	Dinophyceae
ASV_733	0	104	0	0	0	0	0	0	0	0	0	0	0.966472709	Eukaryota	Hacrobia	Haptophyta	Haptophyta_Clade_HAP3	Haptophyta_Clade_HAP3_X	Haptophyta_Clade_HAP3_XX	Haptophyta_Clade_HAP3_XXX	Haptophyta_Clade_HAP3_XXX_sp.
ASV_734	0	0	0	0	99	5	0	0	0	0	0	0	0.999663706	Eukaryota	Alveolata	Dinoflagellata	Syndiniales	Dino-Group-II	Dino-Group-II-Clade-14	Dino-Group-II-Clade-14_X	Dino-Group-II-Clade-14_X_sp.
ASV_735	3	11	0	14	0	5	0	10	21	0	5	34	0.722411422	Eukaryota	Opisthokonta	Fungi	Chytridiomycota	Chytridiomycotina	Chytridiomycetes
ASV_736	39	57	3	4	0	0	0	0	0	0	0	0	0.846202537	Eukaryota	Opisthokonta
ASV_737	10	6	3	25	11	47	0	0	0	0	0	0	0.972242616	Eukaryota	Alveolata	Dinoflagellata	Dinophyceae	Dinophyceae_X	Dinophyceae_XX	Dinophyceae_XXX	Dinophyceae_XXX_sp.
ASV_738	31	23	30	7	4	7	0	0	0	0	0	0	0.992785218	Eukaryota	Alveolata	Dinoflagellata	Dinophyceae	Dinophyceae_X	Dinophyceae_XX	Dinophyceae_XXX	Dinophyceae_XXX_sp.
ASV_739	0	101	0	0	0	0	0	0	0	0	0	0	0.999999339	Eukaryota	Alveolata	Dinoflagellata	Syndiniales	Dino-Group-II	Dino-Group-II-Clade-1	Dino-Group-II-Clade-1_X	Dino-Group-II-Clade-1_X_sp.
ASV_740	0	28	49	0	0	0	3	21	0	0	0	0	0.999671291	Eukaryota	Alveolata	Dinoflagellata	Syndiniales	Dino-Group-II	Dino-Group-II-Clade-10-and-11	Dino-Group-II-Clade-10-and-11_X	Dino-Group-II-Clade-10-and-11_X_sp.
ASV_741	0	0	101	0	0	0	0	0	0	0	0	0	0.767410305	Eukaryota	Alveolata	Dinoflagellata	Dinophyceae
ASV_742	0	1	8	0	0	81	0	0	0	0	3	0	0.99235703	Eukaryota	Stramenopiles	Ochrophyta	Bacillariophyta	Bacillariophyta_X	Raphid-pennate
ASV_743	12	30	14	0	20	0	0	0	0	0	0	24	1	Eukaryota
ASV_744	24	51	0	25	0	0	0	0	0	0	0	0	0.992345601	Eukaryota	Hacrobia	Haptophyta	Prymnesiophyceae	Prymnesiales	Prymnesiaceae	Prymnesium
ASV_745	0	0	0	0	0	0	0	0	0	0	0	6	0.797286115	Eukaryota	Alveolata	Ciliophora	Spirotrichea	Tintinnida	Dictyocystidae	Laackmanniella	Laackmanniella_prolongata
ASV_746	0	0	0	0	0	100	0	0	0	0	0	0	0.745750117	Eukaryota	Opisthokonta
ASV_747	18	64	5	11	0	1	0	0	0	0	0	0	0.97699117	Eukaryota	Opisthokonta	Fungi
ASV_748	0	3	0	0	40	56	0	0	0	0	0	0	0.999997762	Eukaryota	Stramenopiles	Ochrophyta	Bacillariophyta	Bacillariophyta_X	Polar-centric-Mediophyceae
ASV_749	6	43	0	50	0	0	0	0	0	0	0	0	0.999885367	Eukaryota	Alveolata	Dinoflagellata	Syndiniales	Dino-Group-II	Dino-Group-II-Clade-10-and-11	Dino-Group-II-Clade-10-and-11_X	Dino-Group-II-Clade-10-and-11_X_sp.
ASV_750	50	36	0	11	0	0	0	0	0	0	0	2	0.998139411	Eukaryota	Alveolata	Dinoflagellata	Syndiniales	Dino-Group-II	Dino-Group-II-Clade-10-and-11	Dino-Group-II-Clade-10-and-11_X	Dino-Group-II-Clade-10-and-11_X_sp.
ASV_752	22	62	14	0	0	0	0	0	0	0	0	0	1	Eukaryota	Stramenopiles	Ochrophyta	MOCH-2	MOCH-2_X	MOCH-2_XX	MOCH-2_XXX	MOCH-2_XXX_sp.
ASV_753	0	81	0	17	0	0	0	0	0	0	0	0	0.999867559	Eukaryota	Stramenopiles	Opalozoa	MAST-3	MAST-3D	MAST-3D_X	MAST-3D_XX	MAST-3D_XX_sp.
ASV_754	0	98	0	0	0	0	0	0	0	0	0	0	0.995741024	Eukaryota	Alveolata	Dinoflagellata	Dinophyceae	Dinophyceae_X	Dinophyceae_XX	Dinophyceae_XXX	Dinophyceae_XXX_sp.
ASV_755	37	61	0	0	0	0	0	0	0	0	0	0	0.979241983	Eukaryota	Archaeplastida	Chlorophyta	Pyramimonadales	Pyramimonadales_X	Pyramimonadales_XX	Halosphaera	Halosphaera_sp.
ASV_756	0	0	0	0	0	0	0	0	0	0	0	98	0.999995481	Eukaryota	Hacrobia	Haptophyta	Prymnesiophyceae
ASV_757	0	37	31	13	0	11	0	0	0	0	0	0	0.758136292	Eukaryota	Stramenopiles	Ochrophyta	Bacillariophyta	Bacillariophyta_X	Polar-centric-Mediophyceae	Chaetoceros	Chaetoceros_peruvianus
ASV_758	0	17	80	0	0	0	0	0	0	0	0	0	0.840203827	Eukaryota	Alveolata	Dinoflagellata	Dinophyceae	Dinophyceae_X	Dinophyceae_XX	Dinophyceae_XXX	Dinophyceae_XXX_sp.
ASV_759	0	97	0	0	0	0	0	0	0	0	0	0	0.898791841	Eukaryota	Alveolata	Dinoflagellata	Dinophyceae	Dinophyceae_X	Dinophyceae_XX	Dinophyceae_XXX	Dinophyceae_XXX_sp.
ASV_760	0	0	0	97	0	0	0	0	0	0	0	0	0.99999933	Eukaryota	Alveolata	Dinoflagellata	Syndiniales	Dino-Group-I	Dino-Group-I-Clade-1	Dino-Group-I-Clade-1_X	Dino-Group-I-Clade-1_X_sp.
ASV_761	0	0	0	97	0	0	0	0	0	0	0	0	0.995042626	Eukaryota	Alveolata	Dinoflagellata	Syndiniales	Dino-Group-II	Dino-Group-II-Clade-4	Amoebophrya	Amoebophrya_ceratii
ASV_762	5	23	53	15	0	0	0	0	0	0	0	0	0.795067153	Eukaryota	Alveolata	Dinoflagellata	Dinophyceae
ASV_763	39	44	0	13	0	0	0	0	0	0	0	0	0.731390593	Eukaryota	Alveolata	Dinoflagellata	Dinophyceae	Gymnodiniales	Chytriodiniaceae	Dissodinium	Dissodinium_pseudolunula
ASV_764	0	0	0	0	17	79	0	0	0	0	0	0	0.872492276	Eukaryota	Alveolata	Dinoflagellata	Dinophyceae	Dinophyceae_X	Dinophyceae_XX	Dinophyceae_XXX	Dinophyceae_XXX_sp.
ASV_765	0	0	0	96	0	0	0	0	0	0	0	0	0.979692435	Eukaryota	Alveolata	Dinoflagellata	Dinophyceae	Suessiales	Suessiales_X	Suessiales_XX	Suessiales_XX_sp.
ASV_766	21	74	0	0	0	0	0	0	0	0	0	0	0.987596096	Eukaryota	Hacrobia	Haptophyta	Haptophyta_Clade_HAP4	Haptophyta_Clade_HAP4_X	Haptophyta_Clade_HAP4_XX	Haptophyta_Clade_HAP4_XXX	Haptophyta_Clade_HAP4_XXX_sp.
ASV_767	58	37	0	0	0	0	0	0	0	0	0	0	1	Eukaryota	Alveolata	Dinoflagellata	Dinophyceae
ASV_768	0	95	0	0	0	0	0	0	0	0	0	0	1	Eukaryota	Alveolata	Dinoflagellata	Dinophyceae
ASV_769	28	66	0	1	0	0	0	0	0	0	0	0	0.903085213	Eukaryota	Alveolata	Dinoflagellata	Syndiniales	Dino-Group-II
ASV_770	0	0	0	95	0	0	0	0	0	0	0	0	0.982661522	Eukaryota	Alveolata	Dinoflagellata	Syndiniales	Dino-Group-I	Dino-Group-I-Clade-4	Dino-Group-I-Clade-4_X	Dino-Group-I-Clade-4_X_sp.
ASV_771	9	72	0	10	0	3	0	0	0	0	0	0	0.983220375	Eukaryota	Hacrobia	Telonemia	Telonemia_X	Telonemia_XX	Telonemia-Group-2	Telonema-Group-2	Telonema_antarcticum
ASV_772	0	94	0	0	0	0	0	0	0	0	0	0	0.999999886	Eukaryota	Stramenopiles	Ochrophyta	MOCH-2	MOCH-2_X	MOCH-2_XX	MOCH-2_XXX	MOCH-2_XXX_sp.
ASV_773	0	46	3	31	0	0	0	6	8	0	0	0	0.980963976	Eukaryota	Alveolata	Dinoflagellata	Syndiniales	Dino-Group-II	Dino-Group-II-Clade-10-and-11	Dino-Group-II-Clade-10-and-11_X	Dino-Group-II-Clade-10-and-11_X_sp.
ASV_774	0	0	0	0	56	38	0	0	0	0	0	0	0.999998832	Eukaryota	Alveolata	Dinoflagellata	Syndiniales	Dino-Group-I	Dino-Group-I-Clade-4	Dino-Group-I-Clade-4_X	Dino-Group-I-Clade-4_X_sp.
ASV_775	94	0	0	0	0	0	0	0	0	0	0	0	0.989702795	Eukaryota	Alveolata	Dinoflagellata	Dinophyceae
ASV_776	0	0	10	84	0	0	0	0	0	0	0	0	0.857506265	Eukaryota	Alveolata	Dinoflagellata	Dinophyceae	Gonyaulacales	Goniodomataceae	Alexandrium	Alexandrium_insuetum
ASV_777	0	0	0	94	0	0	0	0	0	0	0	0	0.705314564	Eukaryota	Alveolata	Dinoflagellata	Dinophyceae
ASV_778	0	0	0	0	0	93	0	0	0	0	0	0	0.999999987	Eukaryota	Alveolata	Dinoflagellata	Dinophyceae	Gonyaulacales	Gonyaulacaceae	Gonyaulax
ASV_779	0	0	0	0	0	93	0	0	0	0	0	0	1	Eukaryota
ASV_780	0	0	93	0	0	0	0	0	0	0	0	0	0.782873487	Eukaryota	Archaeplastida	Chlorophyta	Chloropicophyceae	Chloropicales	Chloropicaceae	Chloropicon	Chloropicon_primus
ASV_781	0	0	76	17	0	0	0	0	0	0	0	0	0.999930635	Eukaryota	Alveolata	Dinoflagellata	Dinophyceae
ASV_782	0	0	0	93	0	0	0	0	0	0	0	0	0.800844602	Eukaryota	Alveolata	Dinoflagellata	Syndiniales	Dino-Group-II	Dino-Group-II_X	Dino-Group-II_XX	Dino-Group-II_XX_sp.
ASV_784	0	92	0	0	0	0	0	0	0	0	0	0	0.985704544	Eukaryota	Alveolata	Ciliophora	Spirotrichea	Strombidiida
ASV_785	44	31	11	6	0	0	0	0	0	0	0	0	0.889961002	Eukaryota	Hacrobia	Haptophyta	Prymnesiophyceae	Prymnesiales	Prymnesiaceae	Prymnesium
ASV_786	66	26	0	0	0	0	0	0	0	0	0	0	1	Eukaryota	Alveolata	Dinoflagellata	Syndiniales	Dino-Group-II	Dino-Group-II-Clade-17	Dino-Group-II-Clade-17_X	Dino-Group-II-Clade-17_X_sp.
ASV_787	34	6	22	24	0	6	0	0	0	0	0	0	0.950956153	Eukaryota	Alveolata	Dinoflagellata	Syndiniales	Dino-Group-II	Dino-Group-II-Clade-5	Dino-Group-II-Clade-5_X	Dino-Group-II-Clade-5_X_sp.
ASV_788	0	0	0	0	0	0	0	0	0	0	0	92	0.999999481	Eukaryota	Hacrobia	Haptophyta	Prymnesiophyceae
ASV_789	0	0	0	0	0	92	0	0	0	0	0	0	0.858595281	Eukaryota	Stramenopiles	Ochrophyta	Bacillariophyta	Bacillariophyta_X	Raphid-pennate	Pseudo-nitzschia
ASV_790	92	0	0	0	0	0	0	0	0	0	0	0	0.998170655	Eukaryota	Alveolata	Dinoflagellata	Syndiniales	Dino-Group-II	Dino-Group-II-Clade-3	Dino-Group-II-Clade-3_X	Dino-Group-II-Clade-3_X_sp.
ASV_791	0	0	0	0	0	0	0	0	0	0	41	46	0.883914015	Eukaryota	Stramenopiles
ASV_792	27	50	11	3	0	0	0	0	0	0	0	0	0.753849441	Eukaryota	Opisthokonta	Fungi	Chytridiomycota	Chytridiomycotina	Chytridiomycetes	Aphelidium	Aphelidium_sp.
ASV_793	22	11	4	22	19	13	0	0	0	0	0	0	0.983049045	Eukaryota	Alveolata	Dinoflagellata	Syndiniales	Dino-Group-II	Dino-Group-II-Clade-1	Dino-Group-II-Clade-1_X	Dino-Group-II-Clade-1_X_sp.
ASV_794	50	8	0	33	0	0	0	0	0	0	0	0	0.990413612	Eukaryota	Alveolata	Dinoflagellata	Dinophyceae	Dinophyceae_X	Dinophyceae_XX	Dinophyceae_XXX	Dinophyceae_XXX_sp.
ASV_795	8	0	0	9	11	50	7	0	0	0	0	0	0.937155794	Eukaryota	Alveolata	Dinoflagellata	Syndiniales	Dino-Group-I	Dino-Group-I-Clade-3	Dino-Group-I-Clade-3_X	Dino-Group-I-Clade-3_X_sp.
ASV_796	18	33	0	0	0	0	12	0	0	0	27	0	0.997309027	Eukaryota	Stramenopiles	Opalozoa	Bicoecea	Anoecales	Cafeteriaceae	Pseudobodo
ASV_797	0	90	0	0	0	0	0	0	0	0	0	0	0.895210875	Eukaryota	Stramenopiles
ASV_798	7	24	26	33	0	0	0	0	0	0	0	0	0.984824198	Eukaryota	Alveolata	Dinoflagellata	Syndiniales	Dino-Group-II	Dino-Group-II-Clade-3	Dino-Group-II-Clade-3_X	Dino-Group-II-Clade-3_X_sp.
ASV_799	0	0	0	0	0	90	0	0	0	0	0	0	1	Eukaryota	Alveolata	Dinoflagellata	Dinophyceae
ASV_800	0	0	0	0	0	90	0	0	0	0	0	0	1	Eukaryota
ASV_801	0	0	0	0	90	0	0	0	0	0	0	0	0.999999283	Eukaryota	Alveolata	Dinoflagellata	Syndiniales	Dino-Group-I	Dino-Group-I-Clade-4	Dino-Group-I-Clade-4_X	Dino-Group-I-Clade-4_X_sp.
ASV_802	0	0	0	90	0	0	0	0	0	0	0	0	0.994957909	Eukaryota	Alveolata	Dinoflagellata	Dinophyceae
ASV_803	1	0	51	0	0	0	4	6	5	0	6	7	1	Eukaryota	Alveolata	Dinoflagellata	Syndiniales	Dino-Group-II	Dino-Group-II-Clade-1	Dino-Group-II-Clade-1_X	Dino-Group-II-Clade-1_X_sp.
ASV_804	8	55	23	0	0	3	0	0	0	0	0	0	0.995295397	Eukaryota	Stramenopiles	Opalozoa	MAST-3	MAST-3E	MAST-3E_X	MAST-3E_XX	MAST-3E_XX_sp.
ASV_805	53	6	0	30	0	0	0	0	0	0	0	0	0.865087472	Eukaryota	Alveolata	Dinoflagellata	Dinophyceae	Dinophyceae_X	Dinophyceae_XX	Dinophyceae_XXX	Dinophyceae_XXX_sp.
ASV_806	0	0	89	0	0	0	0	0	0	0	0	0	0.878046824	Eukaryota	Stramenopiles	Ochrophyta
ASV_807	0	0	0	0	1	0	0	30	52	0	5	0	0.998243616	Eukaryota	Hacrobia	Telonemia	Telonemia_X	Telonemia_XX	Telonemia-Group-2	Telonema-Group-2	Telonema_antarcticum
ASV_808	0	0	0	0	0	0	0	0	0	0	0	88	0.901280173	Eukaryota	Rhizaria	Cercozoa	Filosa-Thecofilosea	Cryomonadida	Protaspa-lineage	Protaspa	Protaspa_grandis
ASV_810	0	0	0	0	0	2	5	0	81	0	0	0	0.999465584	Eukaryota	Opisthokonta
ASV_811	0	0	10	0	8	70	0	0	0	0	0	0	1	Eukaryota
ASV_812	0	2	42	0	0	43	0	0	0	0	0	0	0.760593063	Eukaryota	Stramenopiles	Ochrophyta	Bacillariophyta	Bacillariophyta_X	Bacillariophyta_XX	Bacillariophyta_XXX	Bacillariophyta_XXX_sp.
ASV_813	0	44	12	31	0	0	0	0	0	0	0	0	0.722136859	Eukaryota	Alveolata	Dinoflagellata	Syndiniales	Dino-Group-II	Dino-Group-II-Clade-26	Dino-Group-II-Clade-26_X	Dino-Group-II-Clade-26_X_sp.
ASV_814	12	41	8	23	3	0	0	0	0	0	0	0	0.701219469	Eukaryota	Alveolata	Dinoflagellata	Syndiniales	Dino-Group-II	Dino-Group-II-Clade-2	Dino-Group-II-Clade-2_X	Dino-Group-II-Clade-2_X_sp.
ASV_815	9	69	0	0	0	0	0	0	5	0	2	0	0.735449003	Eukaryota	Eukaryota_X	Eukaryota_XX	Eukaryota_XXX	Eukaryota_XXXX	Eukaryota_XXXXX	Eukaryota_XXXXXX	Eukaryota_XXXXXX_sp.
ASV_816	7	49	0	30	0	0	0	0	0	0	0	0	0.957991065	Eukaryota	Alveolata	Dinoflagellata	Dinophyceae	Dinophyceae_X	Dinophyceae_XX	Dinophyceae_XXX	Dinophyceae_XXX_sp.
ASV_817	3	53	15	11	0	4	0	0	0	0	0	0	0.999801375	Eukaryota	Hacrobia	Telonemia	Telonemia_X	Telonemia_XX	Telonemia-Group-1	Telonema-Group-1
ASV_818	19	32	20	15	0	0	0	0	0	0	0	0	1	Eukaryota
ASV_819	45	29	0	12	0	0	0	0	0	0	0	0	0.993326367	Eukaryota	Alveolata	Dinoflagellata	Dinophyceae	Dinophyceae_X	Dinophyceae_XX	Dinophyceae_XXX	Dinophyceae_XXX_sp.
ASV_820	27	38	17	4	0	0	0	0	0	0	0	0	0.999955042	Eukaryota	Alveolata	Dinoflagellata	Syndiniales	Dino-Group-II	Dino-Group-II-Clade-16	Dino-Group-II-Clade-16_X	Dino-Group-II-Clade-16_X_sp.
ASV_821	15	57	13	0	0	1	0	0	0	0	0	0	0.855558201	Eukaryota	Opisthokonta	Fungi	Chytridiomycota	Chytridiomycotina	Chytridiomycetes	Aphelidium	Aphelidium_sp.
ASV_822	0	0	0	0	0	86	0	0	0	0	0	0	0.999999979	Eukaryota	Alveolata	Dinoflagellata	Syndiniales	Dino-Group-II	Dino-Group-II-Clade-16	Dino-Group-II-Clade-16_X	Dino-Group-II-Clade-16_X_sp.
ASV_823	86	0	0	0	0	0	0	0	0	0	0	0	0.976845901	Eukaryota	Alveolata	Dinoflagellata	Dinophyceae	Dinophyceae_X	Dinophyceae_XX	Dinophyceae_XXX	Dinophyceae_XXX_sp.
ASV_824	0	0	19	67	0	0	0	0	0	0	0	0	0.786517461	Eukaryota	Alveolata	Dinoflagellata	Syndiniales	Dino-Group-I	Dino-Group-I-Clade-5	Dino-Group-I-Clade-5_X	Dino-Group-I-Clade-5_X_sp.
ASV_825	10	45	13	17	0	0	0	0	0	0	0	0	0.93668293	Eukaryota	Hacrobia	Haptophyta	Prymnesiophyceae	Prymnesiales	Prymnesiaceae	Prymnesium
ASV_826	0	85	0	0	0	0	0	0	0	0	0	0	0.99269337	Eukaryota	Alveolata	Dinoflagellata	Dinophyceae	Dinophyceae_X	Dinophyceae_XX	Dinophyceae_XXX	Dinophyceae_XXX_sp.
ASV_827	0	0	0	0	0	85	0	0	0	0	0	0	0.999826771	Eukaryota	Stramenopiles	Ochrophyta	Bacillariophyta	Bacillariophyta_X	Raphid-pennate
ASV_828	85	0	0	0	0	0	0	0	0	0	0	0	0.936622384	Eukaryota	Alveolata	Dinoflagellata	Dinophyceae	Dinophyceae_X	Dinophyceae_XX	Dinophyceae_XXX	Dinophyceae_XXX_sp.
ASV_829	85	0	0	0	0	0	0	0	0	0	0	0	1	Eukaryota	Alveolata	Dinoflagellata	Dinophyceae
ASV_830	0	0	0	0	0	0	0	43	13	9	19	0	0.742622339	Eukaryota	Archaeplastida	Chlorophyta	Pyramimonadales	Pyramimonadales_X	Pyramimonadales_XX	Pterosperma	Pterosperma_sp.
ASV_831	26	12	0	45	1	0	0	0	0	0	0	0	0.999997678	Eukaryota	Hacrobia	Picozoa	Picozoa_X	Picozoa_XX	Picozoa_XXX	Picomonas	Picomonas_judraskeda
ASV_832	84	0	0	0	0	0	0	0	0	0	0	0	0.974331999	Eukaryota	Alveolata	Dinoflagellata	Dinophyceae	Dinophyceae_X	Dinophyceae_XX	Dinophyceae_XXX	Dinophyceae_XXX_sp.
ASV_833	13	0	0	71	0	0	0	0	0	0	0	0	1	Eukaryota
ASV_834	0	0	0	84	0	0	0	0	0	0	0	0	0.999999829	Eukaryota	Hacrobia	Haptophyta	Haptophyta_Clade_HAP2	Haptophyta_Clade_HAP2_X	Haptophyta_Clade_HAP2_XX	Haptophyta_Clade_HAP2_XXX	Haptophyta_Clade_HAP2_XXX_sp.
ASV_835	74	9	0	0	0	0	0	0	0	0	0	0	0.94862353	Eukaryota	Rhizaria	Radiolaria	Acantharea	Acantharea_X	Acantharea_XX	Acanthocolla	Acanthocolla_cruciata
ASV_836	0	83	0	0	0	0	0	0	0	0	0	0	0.999775797	Eukaryota	Hacrobia	Haptophyta	Haptophyta_Clade_HAP5	Haptophyta_Clade_HAP5_X	Haptophyta_Clade_HAP5_XX	Haptophyta_Clade_HAP5_XXX	Haptophyta_Clade_HAP5_XXX_sp.
ASV_837	7	18	16	0	13	26	0	1	0	0	0	2	0.999999338	Eukaryota	Stramenopiles	Sagenista	MAST-9	MAST-9D	MAST-9D_X	MAST-9D_XX	MAST-9D_XX_sp.
ASV_838	53	7	11	12	0	0	0	0	0	0	0	0	1	Eukaryota	Alveolata	Dinoflagellata	Syndiniales	Dino-Group-II	Dino-Group-II-Clade-1	Dino-Group-II-Clade-1_X	Dino-Group-II-Clade-1_X_sp.
ASV_839	0	53	5	19	0	0	0	0	5	0	0	1	0.999999648	Eukaryota	Alveolata	Dinoflagellata	Dinophyceae
ASV_840	44	21	0	18	0	0	0	0	0	0	0	0	0.728192724	Eukaryota	Alveolata	Dinoflagellata	Dinophyceae	Prorocentrales	Prorocentraceae	Prorocentrum	Prorocentrum_sp.
ASV_841	0	0	0	0	0	0	0	0	83	0	0	0	0.999997116	Eukaryota	Rhizaria	Cercozoa	Filosa-Thecofilosea	Ebriida	TAGIRI1-lineage	TAGIRI1-lineage_X	TAGIRI1-lineage_X_sp.
ASV_842	0	0	0	83	0	0	0	0	0	0	0	0	0.999999551	Eukaryota	Stramenopiles	Ochrophyta	Bacillariophyta	Bacillariophyta_X	Polar-centric-Mediophyceae
ASV_844	30	40	12	0	0	0	0	0	0	0	0	0	1	Eukaryota	Alveolata	Dinoflagellata	Syndiniales	Dino-Group-II	Dino-Group-II-Clade-14	Dino-Group-II-Clade-14_X	Dino-Group-II-Clade-14_X_sp.
ASV_845	0	82	0	0	0	0	0	0	0	0	0	0	0.926366714	Eukaryota	Hacrobia	Haptophyta	Prymnesiophyceae	Calcihaptophycidae	Rhabdosphaeraceae	Algirosphaera	Algirosphaera_sp.
ASV_846	41	28	13	0	0	0	0	0	0	0	0	0	0.999999998	Eukaryota	Stramenopiles	Opalozoa	MAST-3	MAST-3I	MAST-3I_X	MAST-3I_XX	MAST-3I_XX_sp.
ASV_847	6	59	0	17	0	0	0	0	0	0	0	0	0.918244757	Eukaryota	Alveolata	Ciliophora	Spirotrichea	Tintinnida	Tintinnida_X	Tintinnida_XX	Tintinnida_XX_sp.
ASV_848	14	5	0	63	0	0	0	0	0	0	0	0	1	Eukaryota	Alveolata	Dinoflagellata	Dinophyceae
ASV_849	0	71	0	11	0	0	0	0	0	0	0	0	0.915132964	Eukaryota	Hacrobia	Haptophyta	Haptophyta_Clade_HAP4	Haptophyta_Clade_HAP4_X	Haptophyta_Clade_HAP4_XX	Haptophyta_Clade_HAP4_XXX	Haptophyta_Clade_HAP4_XXX_sp.
ASV_850	0	0	0	82	0	0	0	0	0	0	0	0	0.999999979	Eukaryota	Alveolata	Dinoflagellata	Syndiniales	Dino-Group-II	Dino-Group-II-Clade-22	Dino-Group-II-Clade-22_X	Dino-Group-II-Clade-22_X_sp.
ASV_851	17	0	0	38	0	0	0	0	0	0	1	11	0.935712726	Eukaryota	Alveolata	Dinoflagellata	Dinophyceae	Dinophyceae_X	Dinophyceae_XX	Dinophyceae_XXX	Dinophyceae_XXX_sp.
ASV_852	0	38	0	43	0	0	0	0	0	0	0	0	0.998563379	Eukaryota	Hacrobia	Haptophyta	Prymnesiophyceae	Prymnesiales	Chrysochromulinaceae	Chrysochromulina
ASV_853	17	51	0	12	0	1	0	0	0	0	0	0	0.909427053	Eukaryota	Alveolata	Dinoflagellata	Syndiniales	Dino-Group-I	Dino-Group-I-Clade-5	Dino-Group-I-Clade-5_X	Dino-Group-I-Clade-5_X_sp.
ASV_854	7	29	37	8	0	0	0	0	0	0	0	0	0.96454893	Eukaryota	Alveolata	Dinoflagellata	Syndiniales	Dino-Group-II
ASV_855	55	25	0	0	0	1	0	0	0	0	0	0	0.999990649	Eukaryota	Alveolata	Dinoflagellata	Syndiniales	Dino-Group-II	Dino-Group-II-Clade-14	Dino-Group-II-Clade-14_X	Dino-Group-II-Clade-14_X_sp.
ASV_856	0	0	0	0	0	0	0	0	0	0	0	81	0.83034988	Eukaryota	Rhizaria	Cercozoa
ASV_857	81	0	0	0	0	0	0	0	0	0	0	0	0.99998743	Eukaryota	Alveolata	Dinoflagellata	Dinophyceae	Gonyaulacales	Ceratiaceae	Tripos
ASV_859	0	0	0	81	0	0	0	0	0	0	0	0	0.814999845	Eukaryota	Alveolata	Dinoflagellata	Dinophyceae
ASV_860	0	0	0	81	0	0	0	0	0	0	0	0	0.999415378	Eukaryota	Alveolata	Dinoflagellata	Syndiniales	Dino-Group-II	Dino-Group-II-Clade-10-and-11	Dino-Group-II-Clade-10-and-11_X	Dino-Group-II-Clade-10-and-11_X_sp.
ASV_861	5	75	0	0	0	0	0	0	0	0	0	0	0.952956413	Eukaryota	Alveolata	Dinoflagellata	Dinophyceae	Dinophyceae_X	Dinophyceae_XX	Dinophyceae_XXX	Dinophyceae_XXX_sp.
ASV_862	0	80	0	0	0	0	0	0	0	0	0	0	0.995156795	Eukaryota	Hacrobia	Telonemia	Telonemia_X	Telonemia_XX	Telonemia-Group-2	Telonema-Group-2	Telonema_antarcticum
ASV_863	0	5	2	46	0	0	9	0	0	0	0	0	0.920137371	Eukaryota	Stramenopiles	Ochrophyta	Bacillariophyta	Bacillariophyta_X	Polar-centric-Mediophyceae	Attheya	Attheya_longicornis
ASV_864	1	4	0	0	43	32	0	0	0	0	0	0	0.841783548	Eukaryota	Alveolata	Dinoflagellata	Dinophyceae	Dinophyceae_X	Dinophyceae_XX	Dinophyceae_XXX	Dinophyceae_XXX_sp.
ASV_865	42	22	0	16	0	0	0	0	0	0	0	0	0.999996526	Eukaryota	Alveolata	Dinoflagellata	Dinophyceae
ASV_866	18	62	0	0	0	0	0	0	0	0	0	0	0.701642098	Eukaryota	Alveolata
ASV_867	0	0	0	0	57	23	0	0	0	0	0	0	0.999675773	Eukaryota	Hacrobia	Haptophyta	Prymnesiophyceae	Phaeocystales	Phaeocystaceae	Phaeocystis	Phaeocystis_rex
ASV_868	80	0	0	0	0	0	0	0	0	0	0	0	0.967634211	Eukaryota	Alveolata	Dinoflagellata	Dinophyceae	Dinophyceae_X	Dinophyceae_XX	Dinophyceae_XXX	Dinophyceae_XXX_sp.
ASV_869	0	0	0	80	0	0	0	0	0	0	0	0	0.999082052	Eukaryota	Alveolata	Dinoflagellata	Dinophyceae	Gonyaulacales	Goniodomataceae	Alexandrium	Alexandrium_pohangense
ASV_870	56	23	0	0	0	0	0	0	0	0	0	0	0.999995334	Eukaryota	Alveolata	Ciliophora	Phyllopharyngea	Cyrtophoria_1	PHYLL_4	PHYLL_4_X	PHYLL_4_X_sp.
ASV_871	0	0	0	0	0	0	79	0	0	0	0	0	0.99999768	Eukaryota	Stramenopiles	Ochrophyta	Bacillariophyta	Bacillariophyta_X	Polar-centric-Mediophyceae
ASV_872	0	0	0	0	0	79	0	0	0	0	0	0	0.980816966	Eukaryota	Alveolata	Dinoflagellata	Dinophyceae	Suessiales	Suessiales_X	Suessiales_XX	Suessiales_XX_sp.
ASV_873	0	0	79	0	0	0	0	0	0	0	0	0	0.702733359	Eukaryota	Alveolata	Dinoflagellata	Syndiniales	Dino-Group-II	Dino-Group-II-Clade-20	Dino-Group-II-Clade-20_X	Dino-Group-II-Clade-20_X_sp.
ASV_874	0	0	0	79	0	0	0	0	0	0	0	0	1	Eukaryota	Alveolata	Dinoflagellata	Dinophyceae
ASV_875	0	78	0	0	0	0	0	0	0	0	0	0	0.998661315	Eukaryota	Hacrobia	Haptophyta	Prymnesiophyceae	Prymnesiales	Chrysochromulinaceae	Chrysochromulina
ASV_876	24	44	3	7	0	0	0	0	0	0	0	0	0.961464309	Eukaryota	Alveolata	Dinoflagellata	Dinophyceae	Dinophyceae_X	Dinophyceae_XX	Dinophyceae_XXX	Dinophyceae_XXX_sp.
ASV_877	0	0	0	0	0	0	0	59	15	0	0	4	0.961736432	Eukaryota	Alveolata	Dinoflagellata	Dinophyceae	Dinophyceae_X	Dinophyceae_XX	Dinophyceae_XXX	Dinophyceae_XXX_sp.
ASV_878	0	0	0	0	0	0	78	0	0	0	0	0	0.999024773	Eukaryota	Rhizaria	Cercozoa
ASV_879	21	0	0	29	0	28	0	0	0	0	0	0	0.979865769	Eukaryota	Alveolata	Dinoflagellata	Dinophyceae	Dinophyceae_X	Dinophyceae_XX	Dinophyceae_XXX	Dinophyceae_XXX_sp.
ASV_881	0	0	0	0	1	0	5	0	21	0	3	47	1	Eukaryota
ASV_882	0	77	0	0	0	0	0	0	0	0	0	0	0.999999226	Eukaryota	Hacrobia	Picozoa	Picozoa_X	Picozoa_XX	Picozoa_XXX	Picomonas	Picomonas_judraskeda
ASV_883	0	0	0	0	51	26	0	0	0	0	0	0	0.980192652	Eukaryota	Stramenopiles	Ochrophyta	Bacillariophyta	Bacillariophyta_X	Raphid-pennate
ASV_884	77	0	0	0	0	0	0	0	0	0	0	0	0.923002619	Eukaryota	Alveolata	Dinoflagellata	Dinophyceae
ASV_886	0	0	0	77	0	0	0	0	0	0	0	0	0.999998637	Eukaryota	Hacrobia	Picozoa	Picozoa_X	Picozoa_XX	Picozoa_XXX	Picomonas	Picomonas_judraskeda
ASV_887	0	0	0	77	0	0	0	0	0	0	0	0	0.945709241	Eukaryota	Alveolata	Dinoflagellata	Syndiniales	Dino-Group-II	Dino-Group-II-Clade-1	Dino-Group-II-Clade-1_X	Dino-Group-II-Clade-1_X_sp.
ASV_888	0	0	0	77	0	0	0	0	0	0	0	0	0.993449435	Eukaryota	Alveolata	Dinoflagellata	Dinophyceae	Dinophyceae_X	Dinophyceae_XX	Dinophyceae_XXX	Dinophyceae_XXX_sp.
ASV_889	15	54	7	0	0	0	0	0	0	0	0	0	0.999952746	Eukaryota	Stramenopiles	Sagenista	MAST-7	MAST-7C	MAST-7C_X	MAST-7C_XX	MAST-7C_XX_sp.
ASV_890	0	5	0	15	0	0	0	39	5	0	0	12	0.996219998	Eukaryota	Alveolata	Dinoflagellata	Dinophyceae	Dinophyceae_X	Dinophyceae_XX	Dinophyceae_XXX	Dinophyceae_XXX_sp.
ASV_891	31	15	5	25	0	0	0	0	0	0	0	0	0.994687844	Eukaryota	Alveolata	Dinoflagellata	Dinophyceae	Dinophyceae_X	Dinophyceae_XX	Dinophyceae_XXX	Dinophyceae_XXX_sp.
ASV_892	0	0	0	0	0	0	0	0	15	0	0	61	0.96378695	Eukaryota	Stramenopiles	Opalozoa	MAST-3	MAST-3D	MAST-3D_X	MAST-3D_XX	MAST-3D_XX_sp.
ASV_893	0	0	0	0	0	76	0	0	0	0	0	0	0.771989474	Eukaryota	Stramenopiles	Ochrophyta	Bacillariophyta	Bacillariophyta_X	Raphid-pennate
ASV_894	0	0	0	76	0	0	0	0	0	0	0	0	0.973045248	Eukaryota	Alveolata	Dinoflagellata	Dinophyceae	Dinophyceae_X	Dinophyceae_XX	Dinophyceae_XXX	Dinophyceae_XXX_sp.
ASV_895	0	0	0	0	0	0	0	28	12	3	26	2	0.984438703	Eukaryota	Alveolata	Ciliophora	Spirotrichea	Choreotrichida	Strobilidiidae_I
ASV_896	59	9	2	0	0	5	0	0	0	0	0	0	1	Eukaryota
ASV_897	10	45	6	14	0	0	0	0	0	0	0	0	0.998707749	Eukaryota	Hacrobia	Haptophyta	Prymnesiophyceae	Prymnesiales	Chrysochromulinaceae	Chrysochromulina
ASV_898	0	0	0	0	0	0	75	0	0	0	0	0	0.999770706	Eukaryota	Stramenopiles	Ochrophyta	Bacillariophyta	Bacillariophyta_X	Radial-centric-basal-Coscinodiscophyceae	Actinocyclus	Actinocyclus_curvatulus
ASV_899	0	0	0	75	0	0	0	0	0	0	0	0	1	Eukaryota	Alveolata	Dinoflagellata	Syndiniales	Dino-Group-II	Dino-Group-II-Clade-1	Dino-Group-II-Clade-1_X	Dino-Group-II-Clade-1_X_sp.
ASV_900	19	15	8	11	0	21	0	0	0	0	0	0	0.999999997	Eukaryota	Alveolata	Dinoflagellata	Noctilucophyceae	Noctilucales	Kofoidiniaceae	Kofoidinium	Kofoidinium_sp.
ASV_901	0	74	0	0	0	0	0	0	0	0	0	0	0.988289147	Eukaryota	Stramenopiles	Opalozoa	MAST-3	MAST-3E	MAST-3E_X	MAST-3E_XX	MAST-3E_XX_sp.
ASV_902	27	26	2	14	2	0	3	0	0	0	0	0	1	Eukaryota	Alveolata	Dinoflagellata	Syndiniales	Dino-Group-II	Dino-Group-II-Clade-1	Dino-Group-II-Clade-1_X	Dino-Group-II-Clade-1_X_sp.
ASV_903	0	0	0	0	0	0	14	31	23	0	2	0	1	Eukaryota
ASV_904	26	7	8	32	0	0	0	0	0	0	0	0	1	Eukaryota	Stramenopiles	Ochrophyta	MOCH-2	MOCH-2_X	MOCH-2_XX	MOCH-2_XXX	MOCH-2_XXX_sp.
ASV_905	25	40	0	8	0	0	0	0	0	0	0	0	1	Eukaryota
ASV_906	28	43	0	2	0	0	0	0	0	0	0	0	0.999997173	Eukaryota	Alveolata	Dinoflagellata	Syndiniales	Dino-Group-II	Dino-Group-II-Clade-1	Dino-Group-II-Clade-1_X	Dino-Group-II-Clade-1_X_sp.
ASV_907	73	0	0	0	0	0	0	0	0	0	0	0	0.979972292	Eukaryota	Alveolata	Dinoflagellata	Syndiniales
ASV_908	73	0	0	0	0	0	0	0	0	0	0	0	1	Eukaryota	Alveolata	Dinoflagellata	Syndiniales	Dino-Group-II	Dino-Group-II-Clade-1	Dino-Group-II-Clade-1_X	Dino-Group-II-Clade-1_X_sp.
ASV_909	73	0	0	0	0	0	0	0	0	0	0	0	0.989058109	Eukaryota	Alveolata	Dinoflagellata	Dinophyceae	Dinophyceae_X	Dinophyceae_XX	Dinophyceae_XXX	Dinophyceae_XXX_sp.
ASV_910	0	0	0	73	0	0	0	0	0	0	0	0	0.920106817	Eukaryota	Stramenopiles	Ochrophyta	Chrysophyceae	Chrysophyceae_X
ASV_911	0	0	0	73	0	0	0	0	0	0	0	0	0.999989726	Eukaryota	Alveolata	Dinoflagellata	Syndiniales	Dino-Group-II	Dino-Group-II-Clade-22	Dino-Group-II-Clade-22_X	Dino-Group-II-Clade-22_X_sp.
ASV_913	57	15	0	0	0	0	0	0	0	0	0	0	1	Eukaryota	Alveolata	Dinoflagellata	Syndiniales	Dino-Group-I	Dino-Group-I-Clade-4	Euduboscquella	Euduboscquella_cachoni
ASV_914	39	33	0	0	0	0	0	0	0	0	0	0	0.701928889	Eukaryota	Alveolata	Ciliophora	Spirotrichea	Choreotrichida
ASV_915	5	67	0	0	0	0	0	0	0	0	0	0	0.706171527	Eukaryota	Alveolata
ASV_916	6	32	5	28	0	1	0	0	0	0	0	0	0.951279092	Eukaryota	Opisthokonta	Fungi
ASV_917	0	0	0	0	0	72	0	0	0	0	0	0	0.739377512	Eukaryota	Opisthokonta
ASV_918	24	28	0	19	0	0	0	0	0	0	0	0	1	Eukaryota
ASV_919	0	71	0	0	0	0	0	0	0	0	0	0	0.89132762	Eukaryota	Alveolata	Ciliophora	Spirotrichea	Tintinnida
ASV_920	0	61	10	0	0	0	0	0	0	0	0	0	0.940548347	Eukaryota	Stramenopiles	Ochrophyta	Bolidophyceae	Parmales	Parmales_X	Parmales_XX	Parmales_XX_sp.
ASV_921	12	59	0	0	0	0	0	0	0	0	0	0	0.942845124	Eukaryota	Alveolata	Dinoflagellata	Syndiniales	Dino-Group-II	Dino-Group-II-Clade-46	Dino-Group-II-Clade-46_X	Dino-Group-II-Clade-46_X_sp.
ASV_922	32	30	0	8	0	0	1	0	0	0	0	0	0.999998842	Eukaryota	Alveolata	Dinoflagellata	Syndiniales	Dino-Group-II	Dino-Group-II-Clade-55	Dino-Group-II-Clade-55_X	Dino-Group-II-Clade-55_X_sp.
ASV_924	0	0	71	0	0	0	0	0	0	0	0	0	0.77918547	Eukaryota	Opisthokonta	Fungi
ASV_925	0	0	0	71	0	0	0	0	0	0	0	0	0.999999972	Eukaryota	Alveolata	Dinoflagellata	Syndiniales	Dino-Group-II	Dino-Group-II-Clade-22	Dino-Group-II-Clade-22_X	Dino-Group-II-Clade-22_X_sp.
ASV_926	0	46	12	0	0	1	0	0	0	0	2	9	0.99991168	Eukaryota	Alveolata	Dinoflagellata	Syndiniales	Dino-Group-II	Dino-Group-II-Clade-36	Dino-Group-II-Clade-36_X	Dino-Group-II-Clade-36_X_sp.
ASV_927	20	6	2	42	0	0	0	0	0	0	0	0	0.976615497	Eukaryota	Alveolata	Dinoflagellata	Dinophyceae	Dinophyceae_X	Dinophyceae_XX	Dinophyceae_XXX	Dinophyceae_XXX_sp.
ASV_928	21	24	25	0	0	0	0	0	0	0	0	0	0.994523817	Eukaryota	Alveolata	Dinoflagellata
ASV_929	0	0	0	0	0	1	0	11	0	0	0	58	0.736400363	Eukaryota	Hacrobia	Cryptophyta	Cryptophyceae	Cryptomonadales	Cryptomonadales_X	Teleaulax	Teleaulax_amphioxeia
ASV_930	0	0	0	0	0	0	0	59	11	0	0	0	0.817440947	Eukaryota	Archaeplastida	Chlorophyta	Pyramimonadales	Pyramimonadales_X	Pyramimonadales_XX	Pterosperma	Pterosperma_cristatum
ASV_931	0	0	0	0	0	70	0	0	0	0	0	0	0.998664019	Eukaryota	Alveolata	Dinoflagellata	Dinophyceae	Dinophyceae_X	Dinophyceae_XX	Dinophyceae_XXX	Dinophyceae_XXX_sp.
ASV_932	0	0	0	0	0	70	0	0	0	0	0	0	0.862634041	Eukaryota	Alveolata	Dinoflagellata	Dinophyceae	Dinophyceae_X	Dinophyceae_XX	Dinophyceae_XXX	Dinophyceae_XXX_sp.
ASV_933	70	0	0	0	0	0	0	0	0	0	0	0	0.930248063	Eukaryota	Alveolata	Dinoflagellata	Dinophyceae	Dinophyceae_X	Dinophyceae_XX	Dinophyceae_XXX	Dinophyceae_XXX_sp.
ASV_934	70	0	0	0	0	0	0	0	0	0	0	0	0.913045911	Eukaryota	Alveolata	Dinoflagellata	Syndiniales	Dino-Group-II	Dino-Group-II-Clade-1	Dino-Group-II-Clade-1_X	Dino-Group-II-Clade-1_X_sp.
ASV_935	70	0	0	0	0	0	0	0	0	0	0	0	0.903606887	Eukaryota	Alveolata	Dinoflagellata	Dinophyceae	Dinophyceae_X	Dinophyceae_XX	Dinophyceae_XXX	Dinophyceae_XXX_sp.
ASV_936	0	0	0	0	70	0	0	0	0	0	0	0	1	Eukaryota
ASV_937	0	0	0	70	0	0	0	0	0	0	0	0	0.777672294	Eukaryota	Stramenopiles	Ochrophyta	Dictyochophyceae	Dictyochophyceae_X	Florenciellales	Pseudochattonella	Pseudochattonella_sp.
ASV_938	40	29	0	0	0	0	0	0	0	0	0	0	1	Eukaryota	Alveolata	Dinoflagellata	Syndiniales	Dino-Group-II	Dino-Group-II-Clade-14	Dino-Group-II-Clade-14_X	Dino-Group-II-Clade-14_X_sp.
ASV_939	0	48	21	0	0	0	0	0	0	0	0	0	0.999999808	Eukaryota	Hacrobia	Haptophyta	Prymnesiophyceae
ASV_940	0	69	0	0	0	0	0	0	0	0	0	0	0.951912037	Eukaryota	Alveolata	Dinoflagellata	Dinophyceae	Dinophyceae_X	Dinophyceae_XX	Dinophyceae_XXX	Dinophyceae_XXX_sp.
ASV_941	19	9	0	27	0	2	4	0	8	0	0	0	0.991424998	Eukaryota	Alveolata	Dinoflagellata	Dinophyceae	Dinophyceae_X	Dinophyceae_XX	Dinophyceae_XXX	Dinophyceae_XXX_sp.
ASV_942	7	49	13	0	0	0	0	0	0	0	0	0	0.870221682	Eukaryota	Rhizaria	Cercozoa	Filosa-Imbricatea	Filosa-Imbricatea_X	Novel-clade-2	Novel-clade-2_X	Novel-clade-2_X_sp.
ASV_943	69	0	0	0	0	0	0	0	0	0	0	0	0.866977345	Eukaryota	Alveolata	Dinoflagellata	Syndiniales	Dino-Group-II
ASV_944	56	0	0	13	0	0	0	0	0	0	0	0	0.884488937	Eukaryota	Alveolata	Dinoflagellata	Dinophyceae
ASV_945	5	0	0	64	0	0	0	0	0	0	0	0	0.828001053	Eukaryota	Alveolata	Dinoflagellata	Syndiniales	Dino-Group-II	Dino-Group-II_X	Dino-Group-II_XX	Dino-Group-II_XX_sp.
ASV_946	1	0	0	0	0	0	2	9	6	1	23	19	0.998988587	Eukaryota	Alveolata	Dinoflagellata	Syndiniales	Dino-Group-II	Dino-Group-II-Clade-13	Dino-Group-II-Clade-13_X	Dino-Group-II-Clade-13_X_sp.
ASV_947	23	38	7	0	0	0	0	0	0	0	0	0	1	Eukaryota	Stramenopiles	Ochrophyta	MOCH-2	MOCH-2_X	MOCH-2_XX	MOCH-2_XXX	MOCH-2_XXX_sp.
ASV_948	28	20	0	20	0	0	0	0	0	0	0	0	0.70189879	Eukaryota	Opisthokonta	Fungi	Chytridiomycota	Chytridiomycotina	Chytridiomycetes
ASV_949	0	0	0	0	0	0	0	0	0	0	0	68	0.902442022	Eukaryota	Alveolata	Dinoflagellata	Syndiniales	Dino-Group-II	Dino-Group-II-Clade-2	Dino-Group-II-Clade-2_X	Dino-Group-II-Clade-2_X_sp.
ASV_950	0	0	3	0	0	65	0	0	0	0	0	0	1	Eukaryota
ASV_951	0	0	15	35	0	0	0	0	0	0	13	4	0.999999998	Eukaryota	Stramenopiles	Opalozoa	MAST-3	MAST-3J	MAST-3J_X	MAST-3J_XX	MAST-3J_XX_sp.
ASV_952	0	67	0	0	0	0	0	0	0	0	0	0	0.991692303	Eukaryota	Hacrobia	Haptophyta	Haptophyta_Clade_HAP5	Haptophyta_Clade_HAP5_X	Haptophyta_Clade_HAP5_XX	Haptophyta_Clade_HAP5_XXX	Haptophyta_Clade_HAP5_XXX_sp.
ASV_953	40	25	0	2	0	0	0	0	0	0	0	0	0.999908422	Eukaryota	Hacrobia	Telonemia	Telonemia_X	Telonemia_XX	Telonemia-Group-2	Telonema-Group-2	Telonema_antarcticum
ASV_954	0	67	0	0	0	0	0	0	0	0	0	0	0.999999799	Eukaryota	Stramenopiles	Ochrophyta	MOCH-2	MOCH-2_X	MOCH-2_XX	MOCH-2_XXX	MOCH-2_XXX_sp.
ASV_955	13	54	0	0	0	0	0	0	0	0	0	0	0.999975625	Eukaryota	Stramenopiles	Opalozoa	MAST-3	MAST-3B	MAST-3B_X	MAST-3B_XX	MAST-3B_XX_sp.
ASV_956	21	46	0	0	0	0	0	0	0	0	0	0	0.930256312	Eukaryota	Stramenopiles	Opalozoa	MAST-3	MAST-3F	MAST-3F_X	MAST-3F_XX	MAST-3F_XX_sp.
ASV_957	0	11	0	0	0	56	0	0	0	0	0	0	0.96766238	Eukaryota	Alveolata	Dinoflagellata	Dinophyceae	Dinophyceae_X	Dinophyceae_XX	Dinophyceae_XXX	Dinophyceae_XXX_sp.
ASV_958	0	0	0	0	0	0	0	0	0	0	0	67	0.999999994	Eukaryota	Stramenopiles	Ochrophyta	Bacillariophyta	Bacillariophyta_X	Polar-centric-Mediophyceae	Chaetoceros
ASV_959	0	0	0	0	56	11	0	0	0	0	0	0	0.999993637	Eukaryota	Alveolata	Dinoflagellata	Dinophyceae
ASV_960	29	23	4	10	0	0	0	0	0	0	0	0	0.998486934	Eukaryota	Hacrobia	Telonemia	Telonemia_X	Telonemia_XX	Telonemia-Group-2	Telonema-Group-2	Telonema_antarcticum
ASV_961	22	12	0	11	10	11	0	0	0	0	0	0	0.963571129	Eukaryota	Alveolata	Dinoflagellata	Dinophyceae	Dinophyceae_X	Dinophyceae_XX	Dinophyceae_XXX	Dinophyceae_XXX_sp.
ASV_962	8	15	0	2	12	29	0	0	0	0	0	0	0.740574282	Eukaryota	Alveolata	Dinoflagellata	Dinophyceae	Gonyaulacales	Goniodomataceae	Alexandrium	Alexandrium_cohorticula
ASV_963	0	0	0	0	0	0	19	45	2	0	0	0	0.999975472	Eukaryota	Alveolata	Dinoflagellata	Syndiniales	Dino-Group-II	Dino-Group-II-Clade-6	Dino-Group-II-Clade-6_X	Dino-Group-II-Clade-6_X_sp.
ASV_964	0	0	0	0	0	0	12	41	13	0	0	0	0.748655035	Eukaryota	Alveolata	Dinoflagellata	Dinophyceae	Gymnodiniales	Chytriodiniaceae	Dissodinium	Dissodinium_pseudolunula
ASV_965	40	21	0	4	0	0	0	0	0	0	0	0	0.999509385	Eukaryota	Hacrobia	Telonemia	Telonemia_X	Telonemia_XX	Telonemia-Group-2	Telonema-Group-2	Telonema_antarcticum
ASV_966	15	37	0	13	0	0	0	0	0	0	0	0	1	Eukaryota	Stramenopiles	Ochrophyta	MOCH-2	MOCH-2_X	MOCH-2_XX	MOCH-2_XXX	MOCH-2_XXX_sp.
ASV_967	14	25	9	17	0	0	0	0	0	0	0	0	0.998559973	Eukaryota	Hacrobia	Haptophyta	Prymnesiophyceae	Prymnesiales	Chrysochromulinaceae	Chrysochromulina
ASV_968	0	44	21	0	0	0	0	0	0	0	0	0	0.942169215	Eukaryota	Alveolata	Dinoflagellata	Dinophyceae
ASV_969	22	38	5	0	0	0	0	0	0	0	0	0	0.922039037	Eukaryota	Alveolata	Dinoflagellata	Syndiniales	Dino-Group-I	Dino-Group-I-Clade-5	Dino-Group-I-Clade-5_X	Dino-Group-I-Clade-5_X_sp.
ASV_970	0	0	65	0	0	0	0	0	0	0	0	0	0.981484105	Eukaryota	Hacrobia	Centroheliozoa	Centroheliozoa_X	Pterocystida	Pterocystidae	Raineriophrys
ASV_971	0	0	0	65	0	0	0	0	0	0	0	0	0.843294136	Eukaryota	Alveolata	Dinoflagellata	Dinophyceae	Dinophyceae_X	Dinophyceae_XX	Dinophyceae_XXX	Dinophyceae_XXX_sp.
ASV_972	8	39	17	0	0	0	0	0	0	0	0	0	0.737137762	Eukaryota	Hacrobia	Haptophyta	Prymnesiophyceae	Prymnesiales
ASV_973	9	6	0	49	0	0	0	0	0	0	0	0	0.832258675	Eukaryota	Alveolata	Dinoflagellata	Dinophyceae
ASV_974	11	53	0	0	0	0	0	0	0	0	0	0	0.998413647	Eukaryota	Archaeplastida	Chlorophyta	Pyramimonadales	Pyramimonadales_X	Pyramimonadales_XX	Halosphaera	Halosphaera_sp.
ASV_975	0	0	0	0	27	0	0	0	0	0	0	37	0.764097016	Eukaryota	Alveolata	Dinoflagellata	Dinophyceae	Dinophysiales	Dinophysiaceae	Dinophysis	Dinophysis_sp.
ASV_976	0	0	0	0	0	0	0	64	0	0	0	0	0.999131614	Eukaryota	Hacrobia	Haptophyta	Prymnesiophyceae	Prymnesiales	Prymnesiaceae	Haptolina
ASV_977	0	0	0	0	0	0	64	0	0	0	0	0	0.987298798	Eukaryota	Rhizaria	Cercozoa	Filosa-Thecofilosea	Ebriida	Ebriida_X	Ebriida_XX	Ebriida_XX_sp.
ASV_978	0	0	0	64	0	0	0	0	0	0	0	0	0.999155326	Eukaryota	Alveolata	Dinoflagellata	Syndiniales	Dino-Group-II	Dino-Group-II-Clade-10-and-11	Dino-Group-II-Clade-10-and-11_X	Dino-Group-II-Clade-10-and-11_X_sp.
ASV_979	0	0	0	64	0	0	0	0	0	0	0	0	1	Eukaryota
ASV_980	14	38	4	0	0	0	0	2	0	0	3	2	0.999938389	Eukaryota	Alveolata	Dinoflagellata	Syndiniales	Dino-Group-II
ASV_981	27	3	0	33	0	0	0	0	0	0	0	0	0.74717888	Eukaryota	Stramenopiles	Ochrophyta	Dictyochophyceae	Dictyochophyceae_X	Florenciellales	Pseudochatonella	Pseudochatonella_sp.
ASV_982	0	63	0	0	0	0	0	0	0	0	0	0	0.986221857	Eukaryota	Alveolata	Dinoflagellata	Syndiniales	Dino-Group-I	Dino-Group-I-Clade-5	Dino-Group-I-Clade-5_X	Dino-Group-I-Clade-5_X_sp.
ASV_983	63	0	0	0	0	0	0	0	0	0	0	0	0.995106166	Eukaryota	Alveolata	Dinoflagellata	Dinophyceae	Dinophyceae_X	Dinophyceae_XX	Dinophyceae_XXX	Dinophyceae_XXX_sp.
ASV_984	0	0	0	63	0	0	0	0	0	0	0	0	0.999843194	Eukaryota	Alveolata	Dinoflagellata	Syndiniales	Dino-Group-II	Dino-Group-II-Clade-1	Dino-Group-II-Clade-1_X	Dino-Group-II-Clade-1_X_sp.
ASV_985	0	0	0	63	0	0	0	0	0	0	0	0	0.984020032	Eukaryota	Alveolata	Dinoflagellata	Dinophyceae	Dinophyceae_X	Dinophyceae_XX	Dinophyceae_XXX	Dinophyceae_XXX_sp.
ASV_986	0	0	0	63	0	0	0	0	0	0	0	0	0.999999107	Eukaryota	Alveolata	Dinoflagellata	Syndiniales	Dino-Group-II	Dino-Group-II-Clade-22	Dino-Group-II-Clade-22_X	Dino-Group-II-Clade-22_X_sp.
ASV_987	0	0	0	63	0	0	0	0	0	0	0	0	0.86679548	Eukaryota	Alveolata	Dinoflagellata
ASV_988	0	0	0	63	0	0	0	0	0	0	0	0	1	Eukaryota
ASV_989	0	0	0	0	0	0	4	10	11	0	7	25	0.977192608	Eukaryota	Stramenopiles	Ochrophyta	Bacillariophyta	Bacillariophyta_X	Polar-centric-Mediophyceae	Chaetoceros
ASV_991	9	40	0	13	0	0	0	0	0	0	0	0	0.829723435	Eukaryota	Hacrobia	Haptophyta	Prymnesiophyceae	Prymnesiales
ASV_992	0	19	4	39	0	0	0	0	0	0	0	0	0.844568146	Eukaryota	Alveolata	Dinoflagellata	Dinophyceae
ASV_993	62	0	0	0	0	0	0	0	0	0	0	0	0.998604302	Eukaryota	Alveolata	Dinoflagellata	Syndiniales	Dino-Group-II	Dino-Group-II-Clade-38	Dino-Group-II-Clade-38_X	Dino-Group-II-Clade-38_X_sp.
ASV_994	62	0	0	0	0	0	0	0	0	0	0	0	0.852883936	Eukaryota	Alveolata	Dinoflagellata	Dinophyceae	Dinophyceae_X	Dinophyceae_XX	Dinophyceae_XXX	Dinophyceae_XXX_sp.
ASV_995	49	0	0	13	0	0	0	0	0	0	0	0	0.999672366	Eukaryota	Alveolata	Dinoflagellata	Dinophyceae
ASV_996	47	0	15	0	0	0	0	0	0	0	0	0	0.960803144	Eukaryota	Alveolata	Dinoflagellata	Dinophyceae
ASV_997	0	0	0	62	0	0	0	0	0	0	0	0	0.999380431	Eukaryota	Opisthokonta	Choanoflagellida	Choanoflagellatea	Acanthoecida	Stephanoecidae_Group_E	Stephanoecidae_Group_E_X	Stephanoecidae_Group_E_X_sp.
ASV_998	38	14	0	9	0	0	0	0	0	0	0	0	0.99999735	Eukaryota	Alveolata	Dinoflagellata	Syndiniales	Dino-Group-II	Dino-Group-II-Clade-1	Dino-Group-II-Clade-1_X	Dino-Group-II-Clade-1_X_sp.
ASV_999	0	0	0	0	0	0	0	0	0	0	0	61	0.782904973	Eukaryota	Alveolata	Ciliophora	Spirotrichea	Strombidiida
ASV_1000	0	0	0	0	0	0	0	0	0	61	0	0	0.999803993	Eukaryota	Alveolata	Ciliophora	Oligohymenophorea	Apostomatia	Pseudocolliniidae	Fusiforma	Fusiforma_themisticola
ASV_1001	27	0	0	0	0	34	0	0	0	0	0	0	0.984820409	Eukaryota	Alveolata	Dinoflagellata	Dinophyceae	Dinophyceae_X	Dinophyceae_XX	Dinophyceae_XXX	Dinophyceae_XXX_sp.
ASV_1002	0	0	0	0	0	61	0	0	0	0	0	0	1	Eukaryota
ASV_1003	61	0	0	0	0	0	0	0	0	0	0	0	0.986708326	Eukaryota	Alveolata	Dinoflagellata	Syndiniales	Dino-Group-II	Dino-Group-II-Clade-3	Dino-Group-II-Clade-3_X	Dino-Group-II-Clade-3_X_sp.
ASV_1005	31	0	0	30	0	0	0	0	0	0	0	0	0.836402372	Eukaryota	Alveolata	Dinoflagellata	Syndiniales	Dino-Group-II	Dino-Group-II-Clade-46	Dino-Group-II-Clade-46_X	Dino-Group-II-Clade-46_X_sp.
ASV_1006	24	0	0	37	0	0	0	0	0	0	0	0	0.961869091	Eukaryota	Alveolata	Dinoflagellata	Syndiniales	Dino-Group-II	Dino-Group-II-Clade-3	Dino-Group-II-Clade-3_X	Dino-Group-II-Clade-3_X_sp.
ASV_1007	0	0	0	61	0	0	0	0	0	0	0	0	1	Eukaryota	Hacrobia	Haptophyta
ASV_1008	2	58	0	0	0	0	0	0	0	0	0	0	1	Eukaryota
ASV_1009	32	21	6	0	0	1	0	0	0	0	0	0	0.736791495	Eukaryota	Alveolata	Dinoflagellata	Syndiniales	Dino-Group-II	Dino-Group-II-Clade-47	Dino-Group-II-Clade-47_X	Dino-Group-II-Clade-47_X_sp.
ASV_1010	60	0	0	0	0	0	0	0	0	0	0	0	1	Eukaryota	Alveolata	Dinoflagellata	Dinophyceae
ASV_1011	50	0	0	10	0	0	0	0	0	0	0	0	0.777509587	Eukaryota	Alveolata	Dinoflagellata	Dinophyceae	Dinophyceae_X	Dinophyceae_XX	Dinophyceae_XXX	Dinophyceae_XXX_sp.
ASV_1012	23	0	10	27	0	0	0	0	0	0	0	0	0.811405743	Eukaryota	Alveolata	Dinoflagellata	Dinophyceae	Dinophyceae_X	Dinophyceae_XX	Dinophyceae_XXX	Dinophyceae_XXX_sp.
ASV_1013	0	1	0	1	0	0	0	1	5	0	28	17	0.759006694	Eukaryota	Hacrobia	Picozoa	Picozoa_X	Picozoa_XX	Picozoa_XXX	Picomonas	Picomonas_judraskeda
ASV_1014	4	29	0	11	0	15	0	0	0	0	0	0	1	Eukaryota	Alveolata	Dinoflagellata	Syndiniales	Dino-Group-II	Dino-Group-II-Clade-14	Dino-Group-II-Clade-14_X	Dino-Group-II-Clade-14_X_sp.
ASV_1015	5	28	7	19	0	0	0	0	0	0	0	0	0.792183547	Eukaryota	Stramenopiles	Pseudofungi	MAST-1	MAST-1D	MAST-1D_X	MAST-1D_XX	MAST-1D_XX_sp.
ASV_1016	38	13	0	8	0	0	0	0	0	0	0	0	0.707773736	Eukaryota	Stramenopiles	Ochrophyta	Dictyochophyceae	Dictyochophyceae_X	Florenciellales	Pseudochatonella	Pseudochatonella_sp.
ASV_1017	16	7	0	36	0	0	0	0	0	0	0	0	0.99999826	Eukaryota	Alveolata	Dinoflagellata	Dinophyceae
ASV_1018	0	18	5	32	4	0	0	0	0	0	0	0	0.899010064	Eukaryota	Alveolata	Dinoflagellata	Syndiniales	Dino-Group-II	Dino-Group-II_X	Dino-Group-II_XX	Dino-Group-II_XX_sp.
ASV_1019	0	0	0	0	0	0	0	0	0	0	0	59	0.99348251	Eukaryota	Stramenopiles	Opalozoa	MAST-3	MAST-3E	MAST-3E_X	MAST-3E_XX	MAST-3E_XX_sp.
ASV_1020	0	0	0	0	0	59	0	0	0	0	0	0	0.712730161	Eukaryota	Archaeplastida	Chlorophyta	Chloropicophyceae	Chloropicales	Chloropicaceae	Chloroparvula	Chloroparvula_japonica
ASV_1021	59	0	0	0	0	0	0	0	0	0	0	0	0.846038251	Eukaryota	Alveolata	Dinoflagellata	Syndiniales	Dino-Group-II	Dino-Group-II-Clade-26	Dino-Group-II-Clade-26_X	Dino-Group-II-Clade-26_X_sp.
ASV_1022	36	0	0	23	0	0	0	0	0	0	0	0	0.783923252	Eukaryota	Alveolata	Dinoflagellata	Syndiniales	Dino-Group-II	Dino-Group-II-Clade-4	Amoebophrya	Amoebophrya_ceratii
ASV_1023	0	0	0	0	59	0	0	0	0	0	0	0	1	Eukaryota	Alveolata	Dinoflagellata	Syndiniales	Dino-Group-II	Dino-Group-II-Clade-32	Dino-Group-II-Clade-32_X	Dino-Group-II-Clade-32_X_sp.
ASV_1024	0	0	0	59	0	0	0	0	0	0	0	0	0.862076853	Eukaryota	Stramenopiles
ASV_1025	0	0	0	59	0	0	0	0	0	0	0	0	0.996277909	Eukaryota	Alveolata	Dinoflagellata	Dinophyceae
ASV_1027	0	11	47	0	0	0	0	0	0	0	0	0	0.950025659	Eukaryota	Alveolata	Dinoflagellata	Dinophyceae	Dinophyceae_X	Dinophyceae_XX	Dinophyceae_XXX	Dinophyceae_XXX_sp.
ASV_1028	8	12	31	7	0	0	0	0	0	0	0	0	0.994112616	Eukaryota	Hacrobia	Haptophyta	Haptophyta_Clade_HAP5	Haptophyta_Clade_HAP5_X	Haptophyta_Clade_HAP5_XX	Haptophyta_Clade_HAP5_XXX	Haptophyta_Clade_HAP5_XXX_sp.
ASV_1029	12	18	0	28	0	0	0	0	0	0	0	0	0.999999766	Eukaryota	Hacrobia	Haptophyta	Haptophyta_Clade_HAP2	Haptophyta_Clade_HAP2_X	Haptophyta_Clade_HAP2_XX	Haptophyta_Clade_HAP2_XXX	Haptophyta_Clade_HAP2_XXX_sp.
ASV_1030	17	41	0	0	0	0	0	0	0	0	0	0	1	Eukaryota	Stramenopiles	Ochrophyta	MOCH-2	MOCH-2_X	MOCH-2_XX	MOCH-2_XXX	MOCH-2_XXX_sp.
ASV_1031	10	22	0	26	0	0	0	0	0	0	0	0	0.97581871	Eukaryota	Hacrobia	Haptophyta	Prymnesiophyceae	Prymnesiales	Chrysochromulinaceae	Chrysochromulina
ASV_1032	28	22	0	2	0	6	0	0	0	0	0	0	0.956140513	Eukaryota	Alveolata	Dinoflagellata	Syndiniales	Dino-Group-II	Dino-Group-II-Clade-1	Dino-Group-II-Clade-1_X	Dino-Group-II-Clade-1_X_sp.
ASV_1033	0	14	44	0	0	0	0	0	0	0	0	0	0.999984399	Eukaryota	Alveolata	Dinoflagellata	Dinophyceae
ASV_1034	0	58	0	0	0	0	0	0	0	0	0	0	0.995787016	Eukaryota	Alveolata	Dinoflagellata
ASV_1035	0	58	0	0	0	0	0	0	0	0	0	0	1	Eukaryota	Alveolata	Dinoflagellata	Syndiniales	Dino-Group-II	Dino-Group-II-Clade-16	Dino-Group-II-Clade-16_X	Dino-Group-II-Clade-16_X_sp.
ASV_1036	10	48	0	0	0	0	0	0	0	0	0	0	0.704970065	Eukaryota	Alveolata	Dinoflagellata	Dinophyceae
ASV_1037	0	0	0	0	0	0	30	26	2	0	0	0	0.985534912	Eukaryota	Alveolata	Dinoflagellata	Dinophyceae	Dinophysiales	Oxyphysiaceae	Phalachroma	Phalacroma_rotundatum
ASV_1038	0	0	0	58	0	0	0	0	0	0	0	0	0.959687805	Eukaryota	Alveolata	Dinoflagellata	Dinophyceae	Dinophyceae_X	Dinophyceae_XX	Dinophyceae_XXX	Dinophyceae_XXX_sp.
ASV_1039	0	0	0	58	0	0	0	0	0	0	0	0	1	Eukaryota
ASV_1040	0	0	0	11	0	0	0	9	9	0	28	0	0.999999992	Eukaryota	Stramenopiles	Opalozoa	MAST-3	MAST-3J	MAST-3J_X	MAST-3J_XX	MAST-3J_XX_sp.
ASV_1041	24	33	0	0	0	0	0	0	0	0	0	0	0.985289772	Eukaryota	Hacrobia	Telonemia	Telonemia_X	Telonemia_XX	Telonemia-Group-2	Telonema-Group-2	Telonema_antarcticum
ASV_1042	6	48	0	3	0	0	0	0	0	0	0	0	0.706155841	Eukaryota	Alveolata	Ciliophora	Spirotrichea	Strombidiida	Strombidiidae_J	Strombidiidae_J_X	Strombidiidae_J_X_sp.
ASV_1043	28	29	0	0	0	0	0	0	0	0	0	0	1	Eukaryota
ASV_1044	0	0	0	0	25	31	0	0	0	1	0	0	0.964732192	Eukaryota	Alveolata	Dinoflagellata	Syndiniales	Dino-Group-II
ASV_1045	0	0	57	0	0	0	0	0	0	0	0	0	0.996093667	Eukaryota	Hacrobia	Haptophyta	Prymnesiophyceae	Prymnesiales	Prymnesiaceae	Prymnesium
ASV_1046	0	0	0	57	0	0	0	0	0	0	0	0	0.755120879	Eukaryota	Alveolata	Dinoflagellata	Dinophyceae
ASV_1047	23	30	0	3	0	0	0	0	0	0	0	0	0.998207345	Eukaryota	Archaeplastida	Chlorophyta	Chloropicophyceae	Chloropicales	Chloropicaceae	Chloroparvula	Chloroparvula_B2_sp.
ASV_1048	0	56	0	0	0	0	0	0	0	0	0	0	0.912009634	Eukaryota	Alveolata	Dinoflagellata	Dinophyceae
ASV_1049	0	0	0	0	17	11	5	19	4	0	0	0	0.91566907	Eukaryota	Alveolata	Dinoflagellata	Dinophyceae	Dinophyceae_X	Dinophyceae_XX	Dinophyceae_XXX	Dinophyceae_XXX_sp.
ASV_1050	0	0	0	0	0	56	0	0	0	0	0	0	0.806123991	Eukaryota	Stramenopiles	Ochrophyta	Bacillariophyta	Bacillariophyta_X	Raphid-pennate	Pseudo-nitzschia
ASV_1051	56	0	0	0	0	0	0	0	0	0	0	0	0.996657275	Eukaryota	Alveolata	Dinoflagellata	Syndiniales	Dino-Group-II	Dino-Group-II-Clade-47	Dino-Group-II-Clade-47_X	Dino-Group-II-Clade-47_X_sp.
ASV_1052	4	0	0	52	0	0	0	0	0	0	0	0	0.806904794	Eukaryota	Alveolata	Dinoflagellata	Dinophyceae	Gymnodiniales	Chytriodiniaceae	Dissodinium	Dissodinium_pseudolunula
ASV_1053	0	0	0	0	56	0	0	0	0	0	0	0	0.93611794	Eukaryota	Alveolata	Dinoflagellata	Dinophyceae	Dinophyceae_X	Dinophyceae_XX	Dinophyceae_XXX	Dinophyceae_XXX_sp.
ASV_1054	0	0	35	21	0	0	0	0	0	0	0	0	0.99993233	Eukaryota	Stramenopiles	Opalozoa	Bicoecea	Bicoecales	Bicoecaceae	Bicosoeca	Bicosoeca_sp.
ASV_1055	0	0	0	56	0	0	0	0	0	0	0	0	0.999962323	Eukaryota	Rhizaria	Radiolaria	Acantharea	Acantharea_X	Acantharea_XX
ASV_1056	12	43	0	0	0	0	0	0	0	0	0	0	1	Eukaryota	Alveolata	Dinoflagellata	Syndiniales	Dino-Group-II	Dino-Group-II-Clade-14	Dino-Group-II-Clade-14_X	Dino-Group-II-Clade-14_X_sp.
ASV_1057	15	25	0	15	0	0	0	0	0	0	0	0	1	Eukaryota	Alveolata	Dinoflagellata	Syndiniales	Dino-Group-II	Dino-Group-II-Clade-14	Dino-Group-II-Clade-14_X	Dino-Group-II-Clade-14_X_sp.
ASV_1058	0	55	0	0	0	0	0	0	0	0	0	0	0.9999444	Eukaryota	Hacrobia	Haptophyta	Prymnesiophyceae
ASV_1059	0	55	0	0	0	0	0	0	0	0	0	0	0.769514909	Eukaryota	Alveolata	Dinoflagellata	Dinophyceae
ASV_1060	0	55	0	0	0	0	0	0	0	0	0	0	0.97045321	Eukaryota	Alveolata	Dinoflagellata
ASV_1061	0	0	0	0	0	55	0	0	0	0	0	0	0.981045292	Eukaryota	Alveolata	Dinoflagellata	Dinophyceae	Dinophyceae_X	Dinophyceae_XX	Dinophyceae_XXX	Dinophyceae_XXX_sp.
ASV_1062	8	0	0	29	0	18	0	0	0	0	0	0	0.989738225	Eukaryota	Alveolata	Dinoflagellata	Dinophyceae	Dinophyceae_X	Dinophyceae_XX	Dinophyceae_XXX	Dinophyceae_XXX_sp.
ASV_1063	6	0	35	0	0	14	0	0	0	0	0	0	0.999996158	Eukaryota	Alveolata	Dinoflagellata	Dinophyceae	Gonyaulacales	Goniodomataceae	Goniodoma	Goniodoma_polyedricum
ASV_1064	0	0	0	0	47	8	0	0	0	0	0	0	0.991318848	Eukaryota	Archaeplastida	Chlorophyta	Trebouxiophyceae	Prasiolales	Prasiolales_X	Pseudochlorella	Pseudochlorella_sp.
ASV_1065	55	0	0	0	0	0	0	0	0	0	0	0	0.99226553	Eukaryota	Alveolata	Dinoflagellata	Dinophyceae	Dinophyceae_X	Dinophyceae_XX	Dinophyceae_XXX	Dinophyceae_XXX_sp.
ASV_1066	0	0	0	55	0	0	0	0	0	0	0	0	0.952533077	Eukaryota	Alveolata	Dinoflagellata	Dinophyceae	Dinophyceae_X	Dinophyceae_XX	Dinophyceae_XXX	Dinophyceae_XXX_sp.
ASV_1067	0	0	0	0	0	54	0	0	0	0	0	0	0.763007224	Eukaryota	Alveolata	Dinoflagellata	Dinophyceae	Dinophysiales	Dinophysiaceae	Dinophysis	Dinophysis_sp.
ASV_1068	14	6	16	17	0	0	0	0	0	0	0	0	0.727622111	Eukaryota	Rhizaria	Radiolaria	Acantharea	Arthracanthida-Symphyacanthida	Arthracanthida-Symphyacanthida_X	Phractopelta	Phractopelta_sarmentosa
ASV_1069	24	4	0	25	0	0	0	0	0	0	0	0	0.985153542	Eukaryota	Opisthokonta	Choanoflagellida	Choanoflagellatea	Acanthoecida	Stephanoecidae_Group_D	Acanthocorbis	Acanthocorbis_unguiculata
ASV_1070	0	53	0	0	0	0	0	0	0	0	0	0	0.953560668	Eukaryota	Alveolata	Dinoflagellata	Dinophyceae	Dinophyceae_X	Dinophyceae_XX	Dinophyceae_XXX	Dinophyceae_XXX_sp.
ASV_1071	15	14	9	15	0	0	0	0	0	0	0	0	0.91135227	Eukaryota	Alveolata	Dinoflagellata	Dinophyceae
ASV_1072	0	0	0	0	0	0	0	0	0	0	0	53	0.949329417	Eukaryota	Alveolata	Dinoflagellata	Dinophyceae	Dinophyceae_X	Dinophyceae_XX	Dinophyceae_XXX	Dinophyceae_XXX_sp.
ASV_1073	0	0	0	0	33	20	0	0	0	0	0	0	0.994929404	Eukaryota	Archaeplastida	Chlorophyta	Trebouxiophyceae	Prasiolales	Prasiolales_X	Pseudochlorella	Pseudochlorella_sp.
ASV_1074	0	0	0	53	0	0	0	0	0	0	0	0	0.995387603	Eukaryota	Alveolata	Dinoflagellata	Syndiniales	Dino-Group-II	Dino-Group-II-Clade-10-and-11	Dino-Group-II-Clade-10-and-11_X	Dino-Group-II-Clade-10-and-11_X_sp.
ASV_1075	0	0	0	0	0	0	0	9	13	0	29	1	0.999217026	Eukaryota	Stramenopiles	Sagenista	MAST-8	MAST-8_X	MAST-8_XX	MAST-8_XXX	MAST-8_XXX_sp.
ASV_1076	0	52	0	0	0	0	0	0	0	0	0	0	0.998816886	Eukaryota	Hacrobia	Haptophyta	Haptophyta_Clade_HAP4	Haptophyta_Clade_HAP4_X	Haptophyta_Clade_HAP4_XX	Haptophyta_Clade_HAP4_XXX	Haptophyta_Clade_HAP4_XXX_sp.
ASV_1077	0	19	33	0	0	0	0	0	0	0	0	0	0.999933794	Eukaryota	Stramenopiles	Ochrophyta	Bacillariophyta	Bacillariophyta_X	Raphid-pennate
ASV_1078	0	4	0	0	0	0	18	12	14	0	0	0	0.958672784	Eukaryota	Alveolata	Dinoflagellata	Syndiniales	Dino-Group-II
ASV_1079	0	0	0	0	0	0	0	0	0	0	0	52	0.987628883	Eukaryota	Alveolata	Dinoflagellata	Dinophyceae	Dinophyceae_X	Dinophyceae_XX	Dinophyceae_XXX	Dinophyceae_XXX_sp.
ASV_1080	0	0	3	0	5	35	0	0	6	3	0	0	0.999155104	Eukaryota	Alveolata	Dinoflagellata	Syndiniales	Dino-Group-I	Dino-Group-I-Clade-4	Dino-Group-I-Clade-4_X	Dino-Group-I-Clade-4_X_sp.
ASV_1081	52	0	0	0	0	0	0	0	0	0	0	0	0.999999689	Eukaryota	Alveolata	Dinoflagellata	Syndiniales	Dino-Group-II	Dino-Group-II-Clade-28	Dino-Group-II-Clade-28_X	Dino-Group-II-Clade-28_X_sp.
ASV_1082	52	0	0	0	0	0	0	0	0	0	0	0	0.99999909	Eukaryota	Alveolata	Dinoflagellata	Dinophyceae
ASV_1083	52	0	0	0	0	0	0	0	0	0	0	0	0.999999996	Eukaryota	Alveolata	Dinoflagellata	Syndiniales	Dino-Group-II	Dino-Group-II-Clade-1	Dino-Group-II-Clade-1_X	Dino-Group-II-Clade-1_X_sp.
ASV_1084	29	0	0	23	0	0	0	0	0	0	0	0	0.996401392	Eukaryota	Rhizaria	Radiolaria	Polycystinea	Nassellaria	Plagiacanthoidea	Pseudocubus	Pseudocubus_obeliscus
ASV_1085	17	0	4	31	0	0	0	0	0	0	0	0	0.999995808	Eukaryota	Alveolata	Dinoflagellata	Syndiniales	Dino-Group-II	Dino-Group-II-Clade-14	Dino-Group-II-Clade-14_X	Dino-Group-II-Clade-14_X_sp.
ASV_1086	0	0	0	0	52	0	0	0	0	0	0	0	0.750974479	Eukaryota	Stramenopiles
ASV_1087	0	0	0	52	0	0	0	0	0	0	0	0	0.999987654	Eukaryota	Alveolata	Dinoflagellata	Dinophyceae	Gonyaulacales	Ceratiaceae	Tripos
ASV_1088	0	0	0	52	0	0	0	0	0	0	0	0	0.973397405	Eukaryota	Alveolata	Dinoflagellata	Dinophyceae	Dinophyceae_X	Dinophyceae_XX	Dinophyceae_XXX	Dinophyceae_XXX_sp.
ASV_1089	0	0	0	0	0	0	0	0	42	0	5	4	0.948529317	Eukaryota	Stramenopiles	Opalozoa	MAST-3	MAST-3F	MAST-3F_X	MAST-3F_XX	MAST-3F_XX_sp.
ASV_1090	12	12	2	8	7	2	0	4	0	0	0	4	1	Eukaryota	Alveolata	Dinoflagellata	Syndiniales	Dino-Group-II	Dino-Group-II-Clade-14	Dino-Group-II-Clade-14_X	Dino-Group-II-Clade-14_X_sp.
ASV_1091	0	51	0	0	0	0	0	0	0	0	0	0	0.96679358	Eukaryota	Hacrobia	Haptophyta	Haptophyta_Clade_HAP5	Haptophyta_Clade_HAP5_X	Haptophyta_Clade_HAP5_XX	Haptophyta_Clade_HAP5_XXX	Haptophyta_Clade_HAP5_XXX_sp.
ASV_1092	17	10	1	20	0	0	0	2	0	0	0	1	0.930775764	Eukaryota	Alveolata	Dinoflagellata	Syndiniales	Dino-Group-II
ASV_1093	0	51	0	0	0	0	0	0	0	0	0	0	0.988417433	Eukaryota	Alveolata	Dinoflagellata	Dinophyceae
ASV_1095	0	0	0	0	9	7	0	32	3	0	0	0	0.999085244	Eukaryota	Hacrobia	Haptophyta	Prymnesiophyceae
ASV_1096	0	0	0	0	0	51	0	0	0	0	0	0	0.999996442	Eukaryota	Alveolata	Dinoflagellata	Dinophyceae
ASV_1097	0	0	0	51	0	0	0	0	0	0	0	0	0.971520935	Eukaryota	Hacrobia	Haptophyta	Prymnesiophyceae	Prymnesiales	Chrysochromulinaceae	Chrysochromulina
ASV_1098	0	0	0	51	0	0	0	0	0	0	0	0	0.999999804	Eukaryota	Alveolata	Dinoflagellata	Syndiniales	Dino-Group-II	Dino-Group-II-Clade-22	Dino-Group-II-Clade-22_X	Dino-Group-II-Clade-22_X_sp.
ASV_1099	0	0	0	51	0	0	0	0	0	0	0	0	0.999999972	Eukaryota	Alveolata	Dinoflagellata	Syndiniales	Dino-Group-II	Dino-Group-II-Clade-22	Dino-Group-II-Clade-22_X	Dino-Group-II-Clade-22_X_sp.
ASV_1100	0	41	9	0	0	0	0	0	0	0	0	0	0.999497066	Eukaryota	Stramenopiles	Sagenista	MAST-7	MAST-7_X	MAST-7_XX	MAST-7_XXX	MAST-7_XXX_sp.
ASV_1101	0	30	0	20	0	0	0	0	0	0	0	0	0.995212065	Eukaryota	Stramenopiles	Sagenista	Labyrinthulomycetes	Labyrinthulales	Labyrinthulaceae	Labyrinthulaceae_X	Labyrinthulaceae_X_sp.
ASV_1102	15	12	23	0	0	0	0	0	0	0	0	0	1	Eukaryota	Stramenopiles	Ochrophyta	MOCH-2	MOCH-2_X	MOCH-2_XX	MOCH-2_XXX	MOCH-2_XXX_sp.
ASV_1103	0	50	0	0	0	0	0	0	0	0	0	0	1	Eukaryota	Alveolata	Dinoflagellata	Syndiniales	Dino-Group-II	Dino-Group-II-Clade-1	Dino-Group-II-Clade-1_X	Dino-Group-II-Clade-1_X_sp.
ASV_1104	21	12	0	17	0	0	0	0	0	0	0	0	0.999999763	Eukaryota	Alveolata	Dinoflagellata	Dinophyceae
ASV_1105	6	14	0	30	0	0	0	0	0	0	0	0	0.837589475	Eukaryota	Alveolata	Dinoflagellata	Syndiniales	Dino-Group-II
ASV_1106	23	25	0	2	0	0	0	0	0	0	0	0	0.795733206	Eukaryota	Alveolata	Dinoflagellata	Syndiniales	Dino-Group-II
ASV_1107	0	0	0	0	0	0	50	0	0	0	0	0	0.995314745	Eukaryota	Alveolata	Ciliophora	Spirotrichea	Strombidiida
ASV_1108	0	0	0	0	0	50	0	0	0	0	0	0	0.731143894	Eukaryota	Opisthokonta
ASV_1109	0	0	0	0	50	0	0	0	0	0	0	0	1	Eukaryota	Stramenopiles	Opalozoa	MAST-3	MAST-3I	MAST-3I_X	MAST-3I_XX	MAST-3I_XX_sp.
ASV_1110	0	0	0	50	0	0	0	0	0	0	0	0	0.997133398	Eukaryota	Stramenopiles	Sagenista	MAST-4	MAST-4C	MAST-4C_X	MAST-4C_XX	MAST-4C_XX_sp.
ASV_1111	0	0	0	0	8	0	0	14	2	1	22	0	0.989395737	Eukaryota	Alveolata	Dinoflagellata	Syndiniales	Dino-Group-II	Dino-Group-II-Clade-3	Dino-Group-II-Clade-3_X	Dino-Group-II-Clade-3_X_sp.
ASV_1112	14	30	0	5	0	0	0	0	0	0	0	0	0.721196762	Eukaryota	Opisthokonta	Fungi	Chytridiomycota	Chytridiomycotina	Chytridiomycetes	Aphelidium	Aphelidium_sp.
ASV_1113	0	49	0	0	0	0	0	0	0	0	0	0	0.990342415	Eukaryota	Alveolata	Ciliophora	Spirotrichea
ASV_1114	18	31	0	0	0	0	0	0	0	0	0	0	0.78156976	Eukaryota	Hacrobia	Haptophyta	Prymnesiophyceae	Coccolithales	Calcidiscaceae
ASV_1115	16	33	0	0	0	0	0	0	0	0	0	0	1	Eukaryota
ASV_1117	45	0	0	4	0	0	0	0	0	0	0	0	0.954710462	Eukaryota	Hacrobia	Haptophyta	Haptophyta_Clade_HAP5	Haptophyta_Clade_HAP5_X	Haptophyta_Clade_HAP5_XX	Haptophyta_Clade_HAP5_XXX	Haptophyta_Clade_HAP5_XXX_sp.
ASV_1118	0	0	0	0	0	0	0	0	49	0	0	0	0.962840771	Eukaryota	Alveolata	Dinoflagellata	Dinophyceae	Dinophyceae_X	Dinophyceae_XX	Dinophyceae_XXX	Dinophyceae_XXX_sp.
ASV_1119	0	0	49	0	0	0	0	0	0	0	0	0	0.999877723	Eukaryota	Alveolata	Dinoflagellata	Syndiniales	Dino-Group-I	Dino-Group-I-Clade-8	Dino-Group-I-Clade-8_X	Dino-Group-I-Clade-8_X_sp.
ASV_1120	0	0	49	0	0	0	0	0	0	0	0	0	0.9936904	Eukaryota	Alveolata	Dinoflagellata	Dinophyceae	Dinophyceae_X	Dinophyceae_XX	Dinophyceae_XXX	Dinophyceae_XXX_sp.
ASV_1121	0	0	0	49	0	0	0	0	0	0	0	0	0.753590226	Eukaryota	Alveolata	Dinoflagellata
ASV_1122	0	48	0	0	0	0	0	0	0	0	0	0	1	Eukaryota	Alveolata	Dinoflagellata	Syndiniales	Dino-Group-II	Dino-Group-II-Clade-14	Dino-Group-II-Clade-14_X	Dino-Group-II-Clade-14_X_sp.
ASV_1123	0	48	0	0	0	0	0	0	0	0	0	0	0.768809079	Eukaryota	Opisthokonta	Choanoflagellida	Choanoflagellatea	Acanthoecida	Stephanoecidae_Group_E	Stephanoecidae_Group_E_X	Stephanoecidae_Group_E_X_sp.
ASV_1124	6	21	0	21	0	0	0	0	0	0	0	0	0.998771649	Eukaryota	Alveolata	Dinoflagellata	Syndiniales	Dino-Group-I	Dino-Group-I-Clade-1	Dino-Group-I-Clade-1_X	Dino-Group-I-Clade-1_X_sp.
ASV_1126	48	0	0	0	0	0	0	0	0	0	0	0	0.738513634	Eukaryota	Alveolata	Dinoflagellata
ASV_1127	0	0	0	0	48	0	0	0	0	0	0	0	0.97851055	Eukaryota	Alveolata	Dinoflagellata
ASV_1128	0	0	0	0	48	0	0	0	0	0	0	0	0.995877954	Eukaryota	Alveolata	Dinoflagellata	Dinophyceae	Dinophyceae_X	Dinophyceae_XX	Dinophyceae_XXX	Dinophyceae_XXX_sp.
ASV_1129	0	0	0	0	0	0	0	0	48	0	0	0	0.998372585	Eukaryota	Alveolata	Dinoflagellata	Syndiniales	Dino-Group-II	Dino-Group-II-Clade-10-and-11	Dino-Group-II-Clade-10-and-11_X	Dino-Group-II-Clade-10-and-11_X_sp.
ASV_1130	0	0	48	0	0	0	0	0	0	0	0	0	0.853038074	Eukaryota	Alveolata	Dinoflagellata	Syndiniales	Dino-Group-II	Dino-Group-II_X	Dino-Group-II_XX	Dino-Group-II_XX_sp.
ASV_1131	0	0	0	48	0	0	0	0	0	0	0	0	0.845517089	Eukaryota	Opisthokonta	Choanoflagellida	Choanoflagellida_X	Choanoflagellida_XX	Choanoflagellida_XX_Clade-3	Choanoflagellida_XX_Clade-3_X	Choanoflagellida_XX_Clade-3_X_sp.
ASV_1132	0	0	0	48	0	0	0	0	0	0	0	0	0.999999134	Eukaryota	Alveolata	Dinoflagellata	Syndiniales	Dino-Group-II	Dino-Group-II-Clade-1	Dino-Group-II-Clade-1_X	Dino-Group-II-Clade-1_X_sp.
ASV_1133	0	0	0	0	0	0	0	0	10	0	8	29	0.999999687	Eukaryota	Stramenopiles	Opalozoa	MAST-3	MAST-3L	MAST-3L_X	MAST-3L_XX	MAST-3L_XX_sp.
ASV_1134	0	24	23	0	0	0	0	0	0	0	0	0	0.987531291	Eukaryota	Hacrobia	Haptophyta	Prymnesiophyceae	Phaeocystales	Phaeocystaceae	Phaeocystis	Phaeocystis_rex
ASV_1135	0	47	0	0	0	0	0	0	0	0	0	0	0.99921099	Eukaryota	Hacrobia	Telonemia	Telonemia_X	Telonemia_XX	Telonemia-Group-2	Telonema-Group-2	Telonema_antarcticum
ASV_1136	0	47	0	0	0	0	0	0	0	0	0	0	0.999997749	Eukaryota	Hacrobia	Haptophyta	Prymnesiophyceae
ASV_1137	23	10	0	14	0	0	0	0	0	0	0	0	1	Eukaryota	Alveolata	Dinoflagellata	Syndiniales	Dino-Group-II	Dino-Group-II-Clade-1	Dino-Group-II-Clade-1_X	Dino-Group-II-Clade-1_X_sp.
ASV_1138	22	9	0	12	0	4	0	0	0	0	0	0	0.936835121	Eukaryota	Alveolata	Dinoflagellata	Dinophyceae	Dinophyceae_X	Dinophyceae_XX	Dinophyceae_XXX	Dinophyceae_XXX_sp.
ASV_1139	0	47	0	0	0	0	0	0	0	0	0	0	0.819925931	Eukaryota	Alveolata	Dinoflagellata	Syndiniales	Dino-Group-II	Dino-Group-II_X	Dino-Group-II_XX	Dino-Group-II_XX_sp.
ASV_1140	30	4	3	10	0	0	0	0	0	0	0	0	0.746437913	Eukaryota	Alveolata	Dinoflagellata	Dinophyceae
ASV_1141	0	47	0	0	0	0	0	0	0	0	0	0	0.978277895	Eukaryota	Archaeplastida
ASV_1142	0	0	0	0	0	0	0	0	0	0	0	47	0.999306711	Eukaryota	Alveolata	Dinoflagellata	Syndiniales	Dino-Group-I	Dino-Group-I-Clade-4	Dino-Group-I-Clade-4_X	Dino-Group-I-Clade-4_X_sp.
ASV_1143	0	0	0	0	0	0	17	0	0	0	0	30	0.991700622	Eukaryota	Rhizaria	Cercozoa	Filosa-Thecofilosea	Cryomonadida	Cryomonadida_X	Cryomonadida_XX	Cryomonadida_XX_sp.
ASV_1144	47	0	0	0	0	0	0	0	0	0	0	0	0.981962454	Eukaryota	Alveolata	Dinoflagellata	Dinophyceae	Dinophyceae_X	Dinophyceae_XX	Dinophyceae_XXX	Dinophyceae_XXX_sp.
ASV_1145	47	0	0	0	0	0	0	0	0	0	0	0	0.987719415	Eukaryota	Alveolata	Dinoflagellata	Dinophyceae	Dinophyceae_X	Dinophyceae_XX	Dinophyceae_XXX	Dinophyceae_XXX_sp.
ASV_1146	47	0	0	0	0	0	0	0	0	0	0	0	0.975508089	Eukaryota	Alveolata	Ciliophora	Spirotrichea	Strombidiida	Tontoniidae_A	Spirotontonia	Spirotontonia_sp.
ASV_1147	0	0	0	47	0	0	0	0	0	0	0	0	0.995804752	Eukaryota	Alveolata	Dinoflagellata	Dinophyceae	Dinophyceae_X	Dinophyceae_XX	Dinophyceae_XXX	Dinophyceae_XXX_sp.
ASV_1148	0	0	0	47	0	0	0	0	0	0	0	0	0.963643826	Eukaryota	Rhizaria	Radiolaria	Acantharea	Acantharea_X	Acantharea_XX	Acantharea_XXX	Acantharea_XXX_sp.
ASV_1150	0	0	0	47	0	0	0	0	0	0	0	0	0.998378525	Eukaryota	Alveolata	Dinoflagellata	Dinophyceae
ASV_1151	0	0	0	0	0	0	0	2	5	0	4	19	0.794935584	Eukaryota	Stramenopiles	Ochrophyta	Bacillariophyta	Bacillariophyta_X	Bacillariophyta_XX	Bacillariophyta_XXX	Bacillariophyta_XXX_sp.
ASV_1152	0	46	0	0	0	0	0	0	0	0	0	0	0.986478583	Eukaryota	Stramenopiles	Ochrophyta
ASV_1153	0	14	0	32	0	0	0	0	0	0	0	0	0.993061848	Eukaryota	Hacrobia	Haptophyta	Haptophyta_Clade_HAP5	Haptophyta_Clade_HAP5_X	Haptophyta_Clade_HAP5_XX	Haptophyta_Clade_HAP5_XXX	Haptophyta_Clade_HAP5_XXX_sp.
ASV_1154	21	15	10	0	0	0	0	0	0	0	0	0	0.999999897	Eukaryota	Stramenopiles	Sagenista	MAST-8	MAST-8B	MAST-8B_X	MAST-8B_XX	MAST-8B_XX_sp.
ASV_1155	0	0	0	0	0	0	0	0	0	0	0	46	1	Eukaryota
ASV_1156	46	0	0	0	0	0	0	0	0	0	0	0	0.999999996	Eukaryota	Alveolata	Dinoflagellata	Syndiniales	Dino-Group-II	Dino-Group-II-Clade-1	Dino-Group-II-Clade-1_X	Dino-Group-II-Clade-1_X_sp.
ASV_1157	4	0	0	0	42	0	0	0	0	0	0	0	0.999997471	Eukaryota	Alveolata	Dinoflagellata	Dinophyceae
ASV_1158	0	0	0	0	46	0	0	0	0	0	0	0	0.999978677	Eukaryota	Alveolata	Dinoflagellata	Syndiniales	Dino-Group-I	Dino-Group-I-Clade-4	Dino-Group-I-Clade-4_X	Dino-Group-I-Clade-4_X_sp.
ASV_1159	0	0	46	0	0	0	0	0	0	0	0	0	0.998600638	Eukaryota	Alveolata	Dinoflagellata	Syndiniales	Dino-Group-II
ASV_1160	0	0	0	46	0	0	0	0	0	0	0	0	0.951794711	Eukaryota	Alveolata	Dinoflagellata	Dinophyceae	Dinophyceae_X	Dinophyceae_XX	Dinophyceae_XXX	Dinophyceae_XXX_sp.
ASV_1161	0	0	0	46	0	0	0	0	0	0	0	0	0.754044993	Eukaryota	Alveolata	Dinoflagellata	Dinophyceae	Prorocentrales	Prorocentraceae	Prorocentrum	Prorocentrum_sp.
ASV_1162	0	0	0	46	0	0	0	0	0	0	0	0	0.997543162	Eukaryota	Alveolata	Dinoflagellata	Syndiniales	Dino-Group-II	Dino-Group-II-Clade-3	Dino-Group-II-Clade-3_X	Dino-Group-II-Clade-3_X_sp.
ASV_1163	0	45	0	0	0	0	0	0	0	0	0	0	1	Eukaryota	Stramenopiles	Ochrophyta	MOCH-2	MOCH-2_X	MOCH-2_XX	MOCH-2_XXX	MOCH-2_XXX_sp.
ASV_1164	0	26	2	0	0	16	0	0	0	0	0	1	0.952940593	Eukaryota	Alveolata	Dinoflagellata	Syndiniales	Dino-Group-I	Dino-Group-I-Clade-1	Dino-Group-I-Clade-1_X	Dino-Group-I-Clade-1_X_sp.
ASV_1165	27	18	0	0	0	0	0	0	0	0	0	0	0.999151694	Eukaryota	Alveolata	Dinoflagellata	Syndiniales	Dino-Group-II
ASV_1166	0	35	0	0	1	0	0	0	9	0	0	0	0.870993772	Eukaryota	Alveolata	Dinoflagellata	Syndiniales	Dino-Group-II	Dino-Group-II-Clade-30	Dino-Group-II-Clade-30_X	Dino-Group-II-Clade-30_X_sp.
ASV_1167	10	14	13	6	0	0	2	0	0	0	0	0	0.747331265	Eukaryota	Stramenopiles	Ochrophyta	Dictyochophyceae	Dictyochophyceae_X	Dictyochales	Dictyocha	Dictyocha_globosa
ASV_1168	0	45	0	0	0	0	0	0	0	0	0	0	0.957454762	Eukaryota	Alveolata	Ciliophora	Spirotrichea	Tintinnida
ASV_1169	3	31	11	0	0	0	0	0	0	0	0	0	0.80904455	Eukaryota	Archaeplastida	Chlorophyta	Pyramimonadales	Pyramimonadales_X	Pyramimonadales_XX	Pterosperma	Pterosperma_cristatum
ASV_1170	0	45	0	0	0	0	0	0	0	0	0	0	0.893168229	Eukaryota	Stramenopiles	Ochrophyta
ASV_1171	0	0	0	0	0	0	0	0	0	0	0	45	0.886056904	Eukaryota	Stramenopiles	Pseudofungi	MAST-2	MAST-2B	MAST-2B_X	MAST-2B_XX	MAST-2B_XX_sp.
ASV_1172	0	0	3	35	0	7	0	0	0	0	0	0	0.717282913	Eukaryota	Alveolata	Dinoflagellata	Noctilucophyceae	Noctilucales	Kofoidiniaceae	Kofoidinium	Kofoidinium_sp.
ASV_1173	0	0	0	0	0	45	0	0	0	0	0	0	0.800102817	Eukaryota	Stramenopiles	Ochrophyta	Bacillariophyta	Bacillariophyta_X	Raphid-pennate	Amphora
ASV_1174	19	0	3	4	0	19	0	0	0	0	0	0	0.952306783	Eukaryota	Alveolata	Dinoflagellata	Dinophyceae	Dinophyceae_X	Dinophyceae_XX	Dinophyceae_XXX	Dinophyceae_XXX_sp.
ASV_1175	45	0	0	0	0	0	0	0	0	0	0	0	1	Eukaryota	Alveolata	Dinoflagellata	Syndiniales	Dino-Group-II	Dino-Group-II-Clade-1	Dino-Group-II-Clade-1_X	Dino-Group-II-Clade-1_X_sp.
ASV_1176	0	0	0	0	0	0	0	0	0	0	0	0	0.775295546	Eukaryota	Alveolata	Dinoflagellata	Dinophyceae	Dinophyceae_X	Dinophyceae_XX	Dinophyceae_XXX	Dinophyceae_XXX_sp.
ASV_1177	0	0	0	45	0	0	0	0	0	0	0	0	0.926937165	Eukaryota	Hacrobia	Haptophyta	Prymnesiophyceae	Prymnesiales	Chrysochromulinaceae	Chrysochromulina
ASV_1178	0	0	0	45	0	0	0	0	0	0	0	0	0.921275457	Eukaryota	Alveolata	Dinoflagellata	Syndiniales	Dino-Group-II
ASV_1179	0	0	0	0	0	0	0	3	13	0	27	0	0.761260327	Eukaryota	Hacrobia	Haptophyta	Prymnesiophyceae	Prymnesiales	Prymnesiaceae
ASV_1180	3	39	2	0	0	0	0	0	0	0	0	0	0.927981713	Eukaryota	Alveolata	Dinoflagellata	Dinophyceae
ASV_1181	0	44	0	0	0	0	0	0	0	0	0	0	0.999219452	Eukaryota	Alveolata	Ciliophora	CONThreeP	CONThreeP_X	CONThreeP_XX	Askenasia	Askenasia_sp.
ASV_1182	15	29	0	0	0	0	0	0	0	0	0	0	0.734984044	Eukaryota	Alveolata	Ciliophora	Spirotrichea	Strombidiida	Strombidiidae
ASV_1183	0	32	12	0	0	0	0	0	0	0	0	0	0.716109003	Eukaryota	Opisthokonta	Fungi	Chytridiomycota	Chytridiomycotina	Chytridiomycetes	Aphelidium	Aphelidium_sp.
ASV_1184	18	5	21	0	0	0	0	0	0	0	0	0	0.99841103	Eukaryota	Alveolata	Dinoflagellata	Syndiniales	Dino-Group-II	Dino-Group-II-Clade-10-and-11	Dino-Group-II-Clade-10-and-11_X	Dino-Group-II-Clade-10-and-11_X_sp.
ASV_1185	13	31	0	0	0	0	0	0	0	0	0	0	0.990710802	Eukaryota	Alveolata	Dinoflagellata	Dinophyceae
ASV_1186	9	20	0	15	0	0	0	0	0	0	0	0	0.918073579	Eukaryota	Opisthokonta	Fungi
ASV_1187	8	22	5	0	0	9	0	0	0	0	0	0	0.999604371	Eukaryota	Hacrobia	Katablepharidophyta	Katablepharidaceae	Katablepharidales	Katablepharidales_X	Leucocryptos	Leucocryptos_sp.
ASV_1188	44	0	0	0	0	0	0	0	0	0	0	0	0.981426764	Eukaryota	Alveolata	Dinoflagellata	Dinophyceae	Dinophyceae_X	Dinophyceae_XX	Dinophyceae_XXX	Dinophyceae_XXX_sp.
ASV_1189	44	0	0	0	0	0	0	0	0	0	0	0	0.99897785	Eukaryota	Alveolata	Dinoflagellata	Dinophyceae	Dinophyceae_X	Dinophyceae_XX	Dinophyceae_XXX	Dinophyceae_XXX_sp.
ASV_1190	29	0	0	15	0	0	0	0	0	0	0	0	0.930706867	Eukaryota	Alveolata	Dinoflagellata	Syndiniales	Dino-Group-II	Dino-Group-II-Clade-3	Dino-Group-II-Clade-3_X	Dino-Group-II-Clade-3_X_sp.
ASV_1191	0	0	0	44	0	0	0	0	0	0	0	0	0.968616071	Eukaryota	Alveolata	Dinoflagellata	Dinophyceae	Dinophyceae_X	Dinophyceae_XX	Dinophyceae_XXX	Dinophyceae_XXX_sp.
ASV_1192	0	0	0	44	0	0	0	0	0	0	0	0	1	Eukaryota
ASV_1193	0	0	0	0	0	0	3	4	24	0	6	0	0.999999879	Eukaryota	Alveolata	Dinoflagellata	Syndiniales	Dino-Group-II	Dino-Group-II-Clade-16	Dino-Group-II-Clade-16_X	Dino-Group-II-Clade-16_X_sp.
ASV_1194	0	43	0	0	0	0	0	0	0	0	0	0	0.839861699	Eukaryota	Stramenopiles	Ochrophyta	Chrysophyceae	Chrysophyceae_X
ASV_1195	16	27	0	0	0	0	0	0	0	0	0	0	0.921948305	Eukaryota	Rhizaria	Radiolaria	Polycystinea	Nassellaria	Plagiacanthoidea	Pseudocubus	Pseudocubus_obeliscus
ASV_1196	0	30	13	0	0	0	0	0	0	0	0	0	0.801656663	Eukaryota	Opisthokonta	Fungi	Chytridiomycota	Chytridiomycotina	Chytridiomycetes
ASV_1197	0	43	0	0	0	0	0	0	0	0	0	0	0.999900094	Eukaryota	Stramenopiles	Sagenista	MAST-8	MAST-8B	MAST-8B_X	MAST-8B_XX	MAST-8B_XX_sp.
ASV_1198	0	43	0	0	0	0	0	0	0	0	0	0	0.850179145	Eukaryota	Stramenopiles	Ochrophyta	Dictyochophyceae	Dictyochophyceae_X	Dictyochales	Dictyochales_X	Dictyochales_X_sp.
ASV_1199	0	19	0	24	0	0	0	0	0	0	0	0	0.999965076	Eukaryota	Alveolata	Dinoflagellata	Syndiniales	Dino-Group-II	Dino-Group-II-Clade-25	Dino-Group-II-Clade-25_X	Dino-Group-II-Clade-25_X_sp.
ASV_1200	0	43	0	0	0	0	0	0	0	0	0	0	0.856708129	Eukaryota	Alveolata	Dinoflagellata	Syndiniales	Dino-Group-II	Dino-Group-II-Clade-29	Dino-Group-II-Clade-29_X	Dino-Group-II-Clade-29_X_sp.
ASV_1202	0	0	0	0	0	0	0	0	0	0	0	43	0.989201916	Eukaryota	Stramenopiles	Opalozoa	MAST-3
ASV_1203	0	0	0	0	0	0	0	0	0	0	0	43	0.749136787	Eukaryota	Stramenopiles	Ochrophyta	Bacillariophyta	Bacillariophyta_X	Raphid-pennate	Halamphora
ASV_1204	0	0	0	0	0	43	0	0	0	0	0	0	0.991483186	Eukaryota	Stramenopiles	Opalozoa	MAST-3	MAST-3E	MAST-3E_X	MAST-3E_XX	MAST-3E_XX_sp.
ASV_1205	43	0	0	0	0	0	0	0	0	0	0	0	0.999486573	Eukaryota	Alveolata	Dinoflagellata	Syndiniales	Dino-Group-II	Dino-Group-II-Clade-10-and-11	Dino-Group-II-Clade-10-and-11_X	Dino-Group-II-Clade-10-and-11_X_sp.
ASV_1206	27	0	0	16	0	0	0	0	0	0	0	0	0.78523852	Eukaryota	Alveolata	Dinoflagellata	Dinophyceae	Dinophyceae_X	Dinophyceae_XX	Dinophyceae_XXX	Dinophyceae_XXX_sp.
ASV_1207	0	0	43	0	0	0	0	0	0	0	0	0	0.808722423	Eukaryota	Alveolata	Dinoflagellata	Dinophyceae	Dinophyceae_X	Dinophyceae_XX	Dinophyceae_XXX	Dinophyceae_XXX_sp.
ASV_1208	0	0	0	0	0	0	0	8	1	0	26	0	0.999668769	Eukaryota	Rhizaria	Radiolaria	Acantharea	Arthracanthida-Symphyacanthida	Arthracanthida-Symphyacanthida_X	Acanthostaurus	Acanthostaurus_purpurascens
ASV_1209	0	42	0	0	0	0	0	0	0	0	0	0	1	Eukaryota
ASV_1210	12	30	0	0	0	0	0	0	0	0	0	0	1	Eukaryota	Alveolata	Dinoflagellata	Syndiniales	Dino-Group-II	Dino-Group-II-Clade-14	Dino-Group-II-Clade-14_X	Dino-Group-II-Clade-14_X_sp.
ASV_1211	0	29	8	5	0	0	0	0	0	0	0	0	0.963617239	Eukaryota	Hacrobia	Haptophyta	Prymnesiophyceae	Prymnesiales	Chrysochromulinaceae	Chrysochromulina
ASV_1212	0	42	0	0	0	0	0	0	0	0	0	0	0.999011932	Eukaryota	Alveolata	Dinoflagellata	Syndiniales	Dino-Group-I	Dino-Group-I-Clade-1	Dino-Group-I-Clade-1_X	Dino-Group-I-Clade-1_X_sp.
ASV_1213	17	21	2	2	0	0	0	0	0	0	0	0	0.959057971	Eukaryota	Alveolata	Dinoflagellata	Dinophyceae	Dinophyceae_X	Dinophyceae_XX	Dinophyceae_XXX	Dinophyceae_XXX_sp.
ASV_1214	9	21	5	7	0	0	0	0	0	0	0	0	0.999995777	Eukaryota	Alveolata	Dinoflagellata	Syndiniales	Dino-Group-II	Dino-Group-II-Clade-44	Dino-Group-II-Clade-44_X	Dino-Group-II-Clade-44_X_sp.
ASV_1215	0	0	0	0	0	0	0	0	0	0	0	42	0.999999445	Eukaryota	Stramenopiles	Ochrophyta	Bacillariophyta	Bacillariophyta_X	Polar-centric-Mediophyceae
ASV_1216	0	0	0	0	0	42	0	0	0	0	0	0	0.980550437	Eukaryota	Alveolata	Dinoflagellata	Dinophyceae	Peridiniales	Protoperidiniaceae	Protoperidinium
ASV_1217	42	0	0	0	0	0	0	0	0	0	0	0	1	Eukaryota	Alveolata	Dinoflagellata	Syndiniales	Dino-Group-I	Dino-Group-I-Clade-4	Euduboscquella	Euduboscquella_cachoni
ASV_1218	29	0	0	13	0	0	0	0	0	0	0	0	0.999879311	Eukaryota	Stramenopiles	Sagenista	MAST-8	MAST-8B	MAST-8B_X	MAST-8B_XX	MAST-8B_XX_sp.
ASV_1219	0	0	0	0	42	0	0	0	0	0	0	0	1	Eukaryota
ASV_1220	0	0	42	0	0	0	0	0	0	0	0	0	0.996098551	Eukaryota	Alveolata	Dinoflagellata	Dinophyceae	Dinophyceae_X	Dinophyceae_XX	Dinophyceae_XXX	Dinophyceae_XXX_sp.
ASV_1221	0	0	0	42	0	0	0	0	0	0	0	0	0.998397089	Eukaryota	Alveolata	Dinoflagellata	Syndiniales	Dino-Group-II	Dino-Group-II-Clade-10-and-11	Dino-Group-II-Clade-10-and-11_X	Dino-Group-II-Clade-10-and-11_X_sp.
ASV_1222	0	5	3	0	0	1	5	8	0	0	4	7	0.999959949	Eukaryota	Rhizaria	Cercozoa	Chlorarachniophyceae	Chlorarachniophyceae_X	NPK2-lineage	NPK2-lineage_X	NPK2-lineage_X_sp.
ASV_1223	0	0	0	0	0	0	0	11	28	0	2	0	0.999997463	Eukaryota	Hacrobia	Haptophyta	Prymnesiophyceae
ASV_1224	0	41	0	0	0	0	0	0	0	0	0	0	0.862737846	Eukaryota	Alveolata	Ciliophora	Spirotrichea
ASV_1225	0	41	0	0	0	0	0	0	0	0	0	0	0.722115777	Eukaryota	Stramenopiles	Ochrophyta	Bacillariophyta	Bacillariophyta_X	Raphid-pennate	Halamphora
ASV_1226	0	41	0	0	0	0	0	0	0	0	0	0	0.999998298	Eukaryota	Hacrobia	Haptophyta	Prymnesiophyceae
ASV_1227	0	4	0	37	0	0	0	0	0	0	0	0	0.999999993	Eukaryota	Alveolata	Dinoflagellata	Syndiniales	Dino-Group-II	Dino-Group-II-Clade-22	Dino-Group-II-Clade-22_X	Dino-Group-II-Clade-22_X_sp.
ASV_1228	0	11	0	30	0	0	0	0	0	0	0	0	0.724364534	Eukaryota	Archaeplastida	Streptophyta	Charophyceae	Charophyceae_X	Charophyceae_XX	Nitella	Nitella_axillaris
ASV_1230	0	0	0	0	0	41	0	0	0	0	0	0	1	Eukaryota
ASV_1231	15	0	0	26	0	0	0	0	0	0	0	0	1	Eukaryota	Alveolata	Dinoflagellata	Syndiniales	Dino-Group-II	Dino-Group-II-Clade-14	Dino-Group-II-Clade-14_X	Dino-Group-II-Clade-14_X_sp.
ASV_1232	2	0	29	0	10	0	0	0	0	0	0	0	0.836176146	Eukaryota	Alveolata	Dinoflagellata
ASV_1233	0	0	0	13	28	0	0	0	0	0	0	0	0.717324593	Eukaryota	Alveolata	Dinoflagellata	Syndiniales	Dino-Group-II	Dino-Group-II_X	Dino-Group-II_XX	Dino-Group-II_XX_sp.
ASV_1234	0	0	0	41	0	0	0	0	0	0	0	0	1	Eukaryota	Stramenopiles	Ochrophyta	MOCH-2	MOCH-2_X	MOCH-2_XX	MOCH-2_XXX	MOCH-2_XXX_sp.
ASV_1235	0	0	0	41	0	0	0	0	0	0	0	0	0.999873908	Eukaryota	Stramenopiles	Opalozoa	MAST-3	MAST-3L	MAST-3L_X	MAST-3L_XX	MAST-3L_XX_sp.
ASV_1236	0	0	0	41	0	0	0	0	0	0	0	0	0.999999899	Eukaryota	Alveolata	Dinoflagellata	Syndiniales	Dino-Group-II	Dino-Group-II-Clade-22	Dino-Group-II-Clade-22_X	Dino-Group-II-Clade-22_X_sp.
ASV_1237	0	40	0	0	0	0	0	0	0	0	0	0	1	Eukaryota
ASV_1238	22	18	0	0	0	0	0	0	0	0	0	0	0.997827211	Eukaryota	Stramenopiles	Ochrophyta	Bolidophyceae	Parmales	Triparmaceae	Triparma	Triparma_mediterranea
ASV_1239	0	40	0	0	0	0	0	0	0	0	0	0	0.93921879	Eukaryota	Stramenopiles	Ochrophyta	Bacillariophyta	Bacillariophyta_X
ASV_1240	9	17	8	6	0	0	0	0	0	0	0	0	0.998379528	Eukaryota	Alveolata	Dinoflagellata	Syndiniales	Dino-Group-II	Dino-Group-II-Clade-1	Dino-Group-II-Clade-1_X	Dino-Group-II-Clade-1_X_sp.
ASV_1241	0	40	0	0	0	0	0	0	0	0	0	0	0.947111806	Eukaryota	Alveolata	Dinoflagellata	Dinophyceae
ASV_1242	15	19	3	3	0	0	0	0	0	0	0	0	0.999999239	Eukaryota	Alveolata	Dinoflagellata	Syndiniales	Dino-Group-II	Dino-Group-II-Clade-17	Dino-Group-II-Clade-17_X	Dino-Group-II-Clade-17_X_sp.
ASV_1243	17	11	0	0	12	0	0	0	0	0	0	0	1	Eukaryota
ASV_1244	0	0	0	0	0	0	0	0	4	0	0	36	0.852325431	Eukaryota	Stramenopiles	Ochrophyta	Bacillariophyta	Bacillariophyta_X	Radial-centric-basal-Coscinodiscophyceae	Rhizosolenia
ASV_1245	0	0	0	2	6	0	4	9	19	0	0	0	0.743428517	Eukaryota	Alveolata	Dinoflagellata	Dinophyceae
ASV_1246	32	0	0	8	0	0	0	0	0	0	0	0	0.835135995	Eukaryota	Alveolata	Dinoflagellata	Syndiniales	Dino-Group-II
ASV_1247	0	0	0	40	0	0	0	0	0	0	0	0	0.936702109	Eukaryota	Alveolata	Dinoflagellata	Dinophyceae
ASV_1248	0	0	0	40	0	0	0	0	0	0	0	0	0.997056733	Eukaryota	Archaeplastida
ASV_1249	0	0	0	0	0	0	3	8	16	0	12	0	0.999996514	Eukaryota	Alveolata	Dinoflagellata	Dinophyceae
ASV_1250	0	0	0	0	0	0	2	15	2	3	3	12	0.981741867	Eukaryota	Alveolata	Dinoflagellata	Dinophyceae
ASV_1251	0	25	0	0	14	0	0	0	0	0	0	0	0.953122374	Eukaryota	Alveolata	Dinoflagellata
ASV_1252	0	39	0	0	0	0	0	0	0	0	0	0	0.999946514	Eukaryota	Hacrobia	Haptophyta	Haptophyta_Clade_HAP2	Haptophyta_Clade_HAP2_X	Haptophyta_Clade_HAP2_XX	Haptophyta_Clade_HAP2_XXX	Haptophyta_Clade_HAP2_XXX_sp.
ASV_1253	0	39	0	0	0	0	0	0	0	0	0	0	0.970449755	Eukaryota	Alveolata	Ciliophora	Oligohymenophorea	OLIGO5	OLIGO5_X	OLIGO5_XX	OLIGO5_XX_sp.
ASV_1254	23	13	0	0	3	0	0	0	0	0	0	0	0.96598677	Eukaryota	Alveolata	Dinoflagellata
ASV_1255	0	39	0	0	0	0	0	0	0	0	0	0	0.81470319	Eukaryota	Alveolata	Dinoflagellata	Syndiniales	Dino-Group-I	Dino-Group-I-Clade-5	Dino-Group-I-Clade-5_X	Dino-Group-I-Clade-5_X_sp.
ASV_1256	0	24	2	13	0	0	0	0	0	0	0	0	0.860563707	Eukaryota	Alveolata	Dinoflagellata	Dinophyceae
ASV_1257	0	39	0	0	0	0	0	0	0	0	0	0	0.999707724	Eukaryota	Alveolata	Dinoflagellata	Syndiniales	Dino-Group-II	Dino-Group-II-Clade-6	Dino-Group-II-Clade-6_X	Dino-Group-II-Clade-6_X_sp.
ASV_1258	0	39	0	0	0	0	0	0	0	0	0	0	0.797036263	Eukaryota	Alveolata	Dinoflagellata	Syndiniales	Dino-Group-II
ASV_1259	0	0	0	0	6	0	0	3	3	0	0	27	0.99999892	Eukaryota	Rhizaria	Cercozoa	Filosa-Thecofilosea	Ebriida	TAGIRI1-lineage	TAGIRI1-lineage_X	TAGIRI1-lineage_X_sp.
ASV_1260	0	0	0	0	0	0	19	0	4	0	0	16	0.943950728	Eukaryota	Rhizaria	Cercozoa	Filosa-Thecofilosea	Cryomonadida	Protaspa-lineage	Protaspa	Protaspa_grandis
ASV_1261	0	0	0	0	0	0	0	39	0	0	0	0	0.995686806	Eukaryota	Alveolata	Dinoflagellata	Dinophyceae	Dinophyceae_X	Dinophyceae_XX	Dinophyceae_XXX	Dinophyceae_XXX_sp.
ASV_1262	0	0	0	1	29	9	0	0	0	0	0	0	0.969734115	Eukaryota	Alveolata	Dinoflagellata	Syndiniales	Dino-Group-II
ASV_1263	0	0	39	0	0	0	0	0	0	0	0	0	1	Eukaryota
ASV_1264	0	17	6	12	0	3	0	0	0	0	0	0	0.990396846	Eukaryota	Stramenopiles	Opalozoa	MAST-3	MAST-3_X	MAST-3_XX	MAST-3_XXX	MAST-3_XXX_sp.
ASV_1265	0	18	15	0	0	0	0	0	0	0	0	0	0.914152397	Eukaryota	Alveolata	Dinoflagellata	Dinophyceae	Dinophyceae_X	Dinophyceae_XX	Dinophyceae_XXX	Dinophyceae_XXX_sp.
ASV_1266	0	38	0	0	0	0	0	0	0	0	0	0	0.800794019	Eukaryota	Alveolata	Dinoflagellata	Dinophyceae	Dinophyceae_X	Dinophyceae_XX	Dinophyceae_XXX	Dinophyceae_XXX_sp.
ASV_1267	0	0	0	0	0	38	0	0	0	0	0	0	0.865853941	Eukaryota	Stramenopiles	Ochrophyta	Bacillariophyta	Bacillariophyta_X	Raphid-pennate
ASV_1268	38	0	0	0	0	0	0	0	0	0	0	0	0.98257627	Eukaryota	Alveolata	Dinoflagellata	Dinophyceae	Dinophyceae_X	Dinophyceae_XX	Dinophyceae_XXX	Dinophyceae_XXX_sp.
ASV_1269	0	0	0	38	0	0	0	0	0	0	0	0	0.999836156	Eukaryota	Rhizaria	Radiolaria	Acantharea	Acantharea_X	Acantharea_XX	Staurolithium	Staurolithium_sp.
ASV_1270	0	0	0	38	0	0	0	0	0	0	0	0	0.731361378	Eukaryota	Alveolata	Dinoflagellata	Dinophyceae	Gymnodiniales	Chytriodiniaceae	Dissodinium	Dissodinium_pseudolunula
ASV_1271	0	0	0	38	0	0	0	0	0	0	0	0	0.847659426	Eukaryota	Archaeplastida	Chlorophyta	Prasino-Clade-9	Prasino-Clade-9_X	Prasino-Clade-9_XX	Prasino-Clade-9_XXX	Prasino-Clade-9_XXX_sp.
ASV_1272	7	30	0	0	0	0	0	0	0	0	0	0	0.977690323	Eukaryota	Stramenopiles	Ochrophyta
ASV_1273	0	37	0	0	0	0	0	0	0	0	0	0	0.875660308	Eukaryota	Stramenopiles
ASV_1274	0	4	7	0	0	0	2	13	5	0	0	6	0.99979633	Eukaryota	Alveolata	Dinoflagellata	Syndiniales	Dino-Group-II	Dino-Group-II-Clade-1	Dino-Group-II-Clade-1_X	Dino-Group-II-Clade-1_X_sp.
ASV_1275	0	37	0	0	0	0	0	0	0	0	0	0	0.887277722	Eukaryota	Alveolata	Dinoflagellata	Dinophyceae	Gymnodiniales	Chytriodiniaceae	Dissodinium	Dissodinium_pseudolunula
ASV_1276	0	0	0	0	0	0	0	0	0	0	0	37	0.992867399	Eukaryota	Alveolata	Dinoflagellata	Dinophyceae	Dinophyceae_X	Dinophyceae_XX	Dinophyceae_XXX	Dinophyceae_XXX_sp.
ASV_1277	0	0	0	0	0	0	18	3	8	0	0	0	0.884481822	Eukaryota	Alveolata	Dinoflagellata	Dinophyceae
ASV_1278	0	0	37	0	0	0	0	0	0	0	0	0	0.954057633	Eukaryota	Alveolata	Dinoflagellata	Dinophyceae	Dinophyceae_X	Dinophyceae_XX	Dinophyceae_XXX	Dinophyceae_XXX_sp.
ASV_1280	0	0	0	37	0	0	0	0	0	0	0	0	0.999837028	Eukaryota	Alveolata	Dinoflagellata	Syndiniales	Dino-Group-II	Dino-Group-II-Clade-10-and-11	Dino-Group-II-Clade-10-and-11_X	Dino-Group-II-Clade-10-and-11_X_sp.
ASV_1281	0	15	0	0	0	7	0	8	0	0	2	4	0.789137299	Eukaryota	Opisthokonta	Choanoflagellida	Choanoflagellatea	Acanthoecida	Stephanoecidae_Group_D	Acanthocorbis	Acanthocorbis_unguiculata
ASV_1282	0	36	0	0	0	0	0	0	0	0	0	0	0.788332787	Eukaryota	Alveolata	Ciliophora	Spirotrichea	Tintinnida
ASV_1283	4	16	5	11	0	0	0	0	0	0	0	0	0.999994108	Eukaryota	Stramenopiles	Ochrophyta	Bolidophyceae	Parmales	Triparmaceae	Triparma
ASV_1284	0	36	0	0	0	0	0	0	0	0	0	0	0.962519527	Eukaryota	Hacrobia	Haptophyta	Prymnesiophyceae	Prymnesiales	Chrysochromulinaceae	Chrysochromulina
ASV_1285	8	27	1	0	0	0	0	0	0	0	0	0	0.999974452	Eukaryota	Alveolata	Dinoflagellata	Syndiniales	Dino-Group-II
ASV_1286	8	27	0	0	0	1	0	0	0	0	0	0	0.736829522	Eukaryota	Alveolata	Dinoflagellata	Syndiniales	Dino-Group-II
ASV_1287	0	36	0	0	0	0	0	0	0	0	0	0	0.999897433	Eukaryota	Alveolata	Dinoflagellata	Syndiniales	Dino-Group-II	Dino-Group-II-Clade-10-and-11	Dino-Group-II-Clade-10-and-11_X	Dino-Group-II-Clade-10-and-11_X_sp.
ASV_1288	11	22	0	3	0	0	0	0	0	0	0	0	0.984659054	Eukaryota	Archaeplastida
ASV_1289	0	0	0	0	0	36	0	0	0	0	0	0	0.921241257	Eukaryota	Alveolata	Dinoflagellata	Dinophyceae
ASV_1290	0	0	0	0	0	36	0	0	0	0	0	0	0.764388361	Eukaryota	Alveolata	Dinoflagellata	Dinophyceae
ASV_1291	36	0	0	0	0	0	0	0	0	0	0	0	0.996986812	Eukaryota	Alveolata	Dinoflagellata	Syndiniales	Dino-Group-I	Dino-Group-I-Clade-5	Dino-Group-I-Clade-5_X	Dino-Group-I-Clade-5_X_sp.
ASV_1292	36	0	0	0	0	0	0	0	0	0	0	0	1	Eukaryota	Stramenopiles	Opalozoa	MAST-3	MAST-3I	MAST-3I_X	MAST-3I_XX	MAST-3I_XX_sp.
ASV_1293	36	0	0	0	0	0	0	0	0	0	0	0	0.999967187	Eukaryota	Alveolata	Ciliophora	Spirotrichea	Strombidiida	Tontoniidae_B	Pseudotontonia	Pseudotontonia_simplicidens
ASV_1294	36	0	0	0	0	0	0	0	0	0	0	0	0.999993642	Eukaryota	Alveolata	Dinoflagellata	Dinophyceae
ASV_1295	36	0	0	0	0	0	0	0	0	0	0	0	0.999999762	Eukaryota	Alveolata	Ciliophora	Spirotrichea
ASV_1296	36	0	0	0	0	0	0	0	0	0	0	0	0.925920881	Eukaryota	Alveolata	Dinoflagellata	Dinophyceae	Dinophyceae_X	Dinophyceae_XX	Dinophyceae_XXX	Dinophyceae_XXX_sp.
ASV_1297	36	0	0	0	0	0	0	0	0	0	0	0	0.988882444	Eukaryota	Alveolata	Dinoflagellata	Dinophyceae	Dinophyceae_X	Dinophyceae_XX	Dinophyceae_XXX	Dinophyceae_XXX_sp.
ASV_1298	30	0	6	0	0	0	0	0	0	0	0	0	0.840450378	Eukaryota	Alveolata	Dinoflagellata	Dinophyceae	Dinophyceae_X	Dinophyceae_XX	Dinophyceae_XXX	Dinophyceae_XXX_sp.
ASV_1299	27	0	0	9	0	0	0	0	0	0	0	0	0.954920956	Eukaryota	Alveolata	Dinoflagellata	Syndiniales	Dino-Group-II
ASV_1300	0	0	0	0	0	0	0	0	0	0	17	17	0.769003803	Eukaryota	Alveolata	Ciliophora	Spirotrichea	Choreotrichida	Strobilidiidae_I	Pelagostrobilidium	Pelagostrobilidium_neptuni
ASV_1301	8	24	3	0	0	0	0	0	0	0	0	0	0.785667827	Eukaryota	Opisthokonta	Fungi	Chytridiomycota	Chytridiomycotina	Chytridiomycetes
ASV_1302	0	35	0	0	0	0	0	0	0	0	0	0	0.98281544	Eukaryota	Alveolata	Dinoflagellata	Dinophyceae	Dinophyceae_X	Dinophyceae_XX	Dinophyceae_XXX	Dinophyceae_XXX_sp.
ASV_1303	0	35	0	0	0	0	0	0	0	0	0	0	0.946363333	Eukaryota	Alveolata	Dinoflagellata	Dinophyceae	Dinophyceae_X	Dinophyceae_XX	Dinophyceae_XXX	Dinophyceae_XXX_sp.
ASV_1304	0	35	0	0	0	0	0	0	0	0	0	0	0.751103088	Eukaryota	Alveolata	Dinoflagellata	Dinophyceae
ASV_1305	0	19	11	0	0	5	0	0	0	0	0	0	0.791304871	Eukaryota	Alveolata	Dinoflagellata	Syndiniales	Dino-Group-II
ASV_1306	2	27	0	6	0	0	0	0	0	0	0	0	1	Eukaryota
ASV_1307	0	0	0	0	0	0	0	0	0	0	0	35	0.790583733	Eukaryota	Hacrobia	Telonemia	Telonemia_X	Telonemia_XX	Telonemia-Group-2	Telonema-Group-2	Telonema_antarcticum
ASV_1308	0	0	0	0	0	0	0	0	0	0	0	35	1	Eukaryota
ASV_1309	0	0	0	9	5	0	6	3	12	0	0	0	0.985353944	Eukaryota	Alveolata	Dinoflagellata	Syndiniales	Dino-Group-II	Dino-Group-II-Clade-23	Dino-Group-II-Clade-23_X	Dino-Group-II-Clade-23_X_sp.
ASV_1310	0	0	0	0	0	35	0	0	0	0	0	0	0.777560077	Eukaryota	Alveolata	Dinoflagellata	Dinophyceae	Dinophyceae_X	Dinophyceae_XX	Dinophyceae_XXX	Dinophyceae_XXX_sp.
ASV_1311	35	0	0	0	0	0	0	0	0	0	0	0	0.999723775	Eukaryota	Alveolata	Ciliophora	Spirotrichea	Strombidiida	Strombidiidae_J	Strombidiidae_J_X	Strombidiidae_J_X_sp.
ASV_1312	20	0	7	8	0	0	0	0	0	0	0	0	0.910961634	Eukaryota	Alveolata	Dinoflagellata	Dinophyceae	Gymnodiniales	Chytriodiniaceae	Dissodinium	Dissodinium_pseudolunula
ASV_1313	7	0	28	0	0	0	0	0	0	0	0	0	0.998927551	Eukaryota	Alveolata	Ciliophora	Spirotrichea	Choreotrichida	Leegaardiellidae_B	Leegaardiella	Leegaardiella_sp.
ASV_1314	0	0	35	0	0	0	0	0	0	0	0	0	0.989946762	Eukaryota	Alveolata	Dinoflagellata	Dinophyceae	Dinophyceae_X	Dinophyceae_XX	Dinophyceae_XXX	Dinophyceae_XXX_sp.
ASV_1315	0	0	35	0	0	0	0	0	0	0	0	0	0.986931917	Eukaryota	Opisthokonta
ASV_1316	0	0	0	35	0	0	0	0	0	0	0	0	1	Eukaryota	Alveolata	Dinoflagellata	Dinophyceae
ASV_1317	0	0	0	35	0	0	0	0	0	0	0	0	0.99999972	Eukaryota	Stramenopiles	Ochrophyta	Bacillariophyta	Bacillariophyta_X
ASV_1318	0	0	0	35	0	0	0	0	0	0	0	0	0.97333517	Eukaryota	Alveolata	Dinoflagellata	Syndiniales	Dino-Group-II	Dino-Group-II-Clade-12	Dino-Group-II-Clade-12_X	Dino-Group-II-Clade-12_X_sp.
ASV_1319	0	34	0	0	0	0	0	0	0	0	0	0	0.963701128	Eukaryota	Alveolata	Ciliophora	Oligohymenophorea	OLIGO5	OLIGO5_X	OLIGO5_XX	OLIGO5_XX_sp.
ASV_1320	0	0	0	0	0	0	5	16	10	1	0	2	0.999943633	Eukaryota	Alveolata	Dinoflagellata	Syndiniales	Dino-Group-II	Dino-Group-II_X	Dino-Group-II-Clade-52_X	Dino-Group-II-Clade-52_X_sp.
ASV_1321	0	0	6	0	0	10	0	7	11	0	0	0	1	Eukaryota
ASV_1322	0	0	0	0	0	34	0	0	0	0	0	0	0.925706704	Eukaryota	Alveolata	Dinoflagellata	Dinophyceae	Dinophyceae_X	Dinophyceae_XX	Dinophyceae_XXX	Dinophyceae_XXX_sp.
ASV_1323	0	0	0	0	0	34	0	0	0	0	0	0	0.992946054	Eukaryota	Alveolata	Dinoflagellata	Dinophyceae	Dinophyceae_X	Dinophyceae_XX	Dinophyceae_XXX	Dinophyceae_XXX_sp.
ASV_1324	34	0	0	0	0	0	0	0	0	0	0	0	0.996532157	Eukaryota	Alveolata	Dinoflagellata	Dinophyceae	Dinophyceae_X	Dinophyceae_XX	Dinophyceae_XXX	Dinophyceae_XXX_sp.
ASV_1325	34	0	0	0	0	0	0	0	0	0	0	0	0.999998382	Eukaryota	Alveolata	Dinoflagellata	Dinophyceae
ASV_1326	0	0	0	0	34	0	0	0	0	0	0	0	0.97663889	Eukaryota	Alveolata	Dinoflagellata	Dinophyceae	Dinophyceae_X	Dinophyceae_XX	Dinophyceae_XXX	Dinophyceae_XXX_sp.
ASV_1327	0	0	34	0	0	0	0	0	0	0	0	0	0.998658828	Eukaryota	Alveolata	Dinoflagellata	Syndiniales	Dino-Group-II	Dino-Group-II-Clade-6	Dino-Group-II-Clade-6_X	Dino-Group-II-Clade-6_X_sp.
ASV_1328	0	0	34	0	0	0	0	0	0	0	0	0	0.963048397	Eukaryota	Opisthokonta	Fungi
ASV_1329	0	0	0	34	0	0	0	0	0	0	0	0	0.788407553	Eukaryota	Opisthokonta	Fungi
ASV_1330	0	0	0	34	0	0	0	0	0	0	0	0	0.79194339	Eukaryota	Alveolata	Dinoflagellata	Dinophyceae	Dinophyceae_X	Dinophyceae_XX	Dinophyceae_XXX	Dinophyceae_XXX_sp.
ASV_1331	0	0	0	34	0	0	0	0	0	0	0	0	1	Eukaryota	Alveolata	Dinoflagellata	Syndiniales	Dino-Group-II	Dino-Group-II-Clade-32	Dino-Group-II-Clade-32_X	Dino-Group-II-Clade-32_X_sp.
ASV_1332	0	0	0	34	0	0	0	0	0	0	0	0	0.987700084	Eukaryota	Alveolata	Dinoflagellata	Syndiniales	Dino-Group-I	Dino-Group-I_X	Dino-Group-I_XX	Dino-Group-I_XX_sp.
ASV_1333	0	33	0	0	0	0	0	0	0	0	0	0	0.873802327	Eukaryota	Alveolata	Dinoflagellata	Syndiniales	Dino-Group-II	Dino-Group-II-Clade-10-and-11	Dino-Group-II-Clade-10-and-11_X	Dino-Group-II-Clade-10-and-11_X_sp.
ASV_1334	0	21	7	0	0	5	0	0	0	0	0	0	0.761497431	Eukaryota	Alveolata	Dinoflagellata	Syndiniales	Dino-Group-II	Dino-Group-II_X	Dino-Group-II_XX	Dino-Group-II_XX_sp.
ASV_1335	11	15	0	6	0	0	0	0	1	0	0	0	0.998827799	Eukaryota	Alveolata	Dinoflagellata	Syndiniales	Dino-Group-II	Dino-Group-II-Clade-12	Dino-Group-II-Clade-12_X	Dino-Group-II-Clade-12_X_sp.
ASV_1336	0	33	0	0	0	0	0	0	0	0	0	0	1	Eukaryota
ASV_1337	0	0	0	0	0	0	0	0	0	0	0	33	0.908483608	Eukaryota	Hacrobia	Picozoa	Picozoa_X	Picozoa_XX	Picozoa_XXX	Picomonas	Picomonas_judraskeda
ASV_1338	0	0	0	0	0	0	0	9	24	0	0	0	0.723039829	Eukaryota	Stramenopiles	Sagenista	MAST-6	MAST-6_X	MAST-6_XX	MAST-6_XXX	MAST-6_XXX_sp.
ASV_1339	0	0	0	0	0	0	17	0	0	0	0	0	0.927297642	Eukaryota	Alveolata	Dinoflagellata	Dinophyceae	Dinophyceae_X	Dinophyceae_XX	Dinophyceae_XXX	Dinophyceae_XXX_sp.
ASV_1340	0	0	0	0	0	33	0	0	0	0	0	0	0.71483514	Eukaryota	Opisthokonta
ASV_1341	33	0	0	0	0	0	0	0	0	0	0	0	0.935632997	Eukaryota	Alveolata	Dinoflagellata	Dinophyceae	Dinophyceae_X	Dinophyceae_XX	Dinophyceae_XXX	Dinophyceae_XXX_sp.
ASV_1342	0	0	33	0	0	0	0	0	0	0	0	0	0.846639377	Eukaryota	Opisthokonta	Fungi
ASV_1343	0	0	0	33	0	0	0	0	0	0	0	0	0.82095102	Eukaryota	Alveolata	Dinoflagellata	Dinophyceae	Dinophyceae_X	Dinophyceae_XX	Dinophyceae_XXX	Dinophyceae_XXX_sp.
ASV_1344	0	0	0	33	0	0	0	0	0	0	0	0	0.989886001	Eukaryota	Alveolata	Dinoflagellata	Dinophyceae	Dinophyceae_X	Dinophyceae_XX	Dinophyceae_XXX	Dinophyceae_XXX_sp.
ASV_1345	6	3	0	0	0	0	4	2	7	0	10	0	1	Eukaryota
ASV_1346	0	0	0	0	0	0	5	7	9	2	5	3	1	Eukaryota
ASV_1347	0	0	0	0	0	0	0	22	0	0	2	8	0.995319415	Eukaryota	Hacrobia	Centroheliozoa	Centroheliozoa_X	Pterocystida	Pterocystida_X	Pterocystida_XX	Pterocystida_XX_sp.
ASV_1348	17	13	2	0	0	0	0	0	0	0	0	0	0.903799964	Eukaryota	Opisthokonta	Fungi
ASV_1349	0	32	0	0	0	0	0	0	0	0	0	0	0.997756354	Eukaryota	Hacrobia	Telonemia	Telonemia_X	Telonemia_XX	Telonemia-Group-2	Telonema-Group-2	Telonema_antarcticum
ASV_1350	5	26	0	1	0	0	0	0	0	0	0	0	0.763084619	Eukaryota	Opisthokonta	Fungi	Fungi_X	Fungi_XX	Fungi_XXX	Fungi_XXXX	Fungi_XXXX_sp.
ASV_1351	0	9	0	0	16	7	0	0	0	0	0	0	0.702897303	Eukaryota	Alveolata	Dinoflagellata	Syndiniales	Dino-Group-II	Dino-Group-II-Clade-46	Dino-Group-II-Clade-46_X	Dino-Group-II-Clade-46_X_sp.
ASV_1352	0	0	0	0	17	15	0	0	0	0	0	0	0.999867551	Eukaryota	Alveolata	Dinoflagellata	Syndiniales	Dino-Group-I	Dino-Group-I-Clade-4	Dino-Group-I-Clade-4_X	Dino-Group-I-Clade-4_X_sp.
ASV_1353	0	0	0	0	0	32	0	0	0	0	0	0	0.995590752	Eukaryota	Stramenopiles	Ochrophyta	Bacillariophyta	Bacillariophyta_X	Polar-centric-Mediophyceae	Chaetoceros	Chaetoceros_circinalis
ASV_1354	0	0	0	0	17	15	0	0	0	0	0	0	0.999873022	Eukaryota	Alveolata	Dinoflagellata	Dinophyceae
ASV_1355	0	0	0	0	0	32	0	0	0	0	0	0	1	Eukaryota
ASV_1356	32	0	0	0	0	0	0	0	0	0	0	0	0.999998446	Eukaryota	Alveolata	Ciliophora	Spirotrichea	Choreotrichida	Leegaardiellidae_B	Leegaardiella	Leegaardiella_sp.
ASV_1357	32	0	0	0	0	0	0	0	0	0	0	0	0.99999998	Eukaryota	Alveolata	Dinoflagellata	Syndiniales	Dino-Group-II	Dino-Group-II-Clade-1	Dino-Group-II-Clade-1_X	Dino-Group-II-Clade-1_X_sp.
ASV_1358	32	0	0	0	0	0	0	0	0	0	0	0	0.956296098	Eukaryota	Alveolata	Dinoflagellata	Dinophyceae	Dinophyceae_X	Dinophyceae_XX	Dinophyceae_XXX	Dinophyceae_XXX_sp.
ASV_1359	32	0	0	0	0	0	0	0	0	0	0	0	0.992949719	Eukaryota	Alveolata	Dinoflagellata	Dinophyceae	Dinophyceae_X	Dinophyceae_XX	Dinophyceae_XXX	Dinophyceae_XXX_sp.
ASV_1360	0	0	0	0	0	0	0	0	32	0	0	0	0.979150206	Eukaryota	Stramenopiles	Ochrophyta	MOCH-2	MOCH-2_X	MOCH-2_XX	MOCH-2_XXX	MOCH-2_XXX_sp.
ASV_1361	0	0	0	32	0	0	0	0	0	0	0	0	0.997233805	Eukaryota	Alveolata	Dinoflagellata	Dinophyceae	Dinophyceae_X	Dinophyceae_XX	Dinophyceae_XXX	Dinophyceae_XXX_sp.
ASV_1362	0	0	0	32	0	0	0	0	0	0	0	0	0.999999982	Eukaryota	Alveolata	Dinoflagellata	Dinophyceae
ASV_1363	0	0	0	0	0	0	0	0	0	0	0	31	0.701027771	Eukaryota	Stramenopiles	Ochrophyta	Bacillariophyta	Bacillariophyta_X	Polar-centric-Mediophyceae	Thalassiosira
ASV_1364	0	0	0	0	0	31	0	0	0	0	0	0	0.996494487	Eukaryota	Alveolata	Ciliophora	Phyllopharyngea	Cyrtophoria_1	PHYLL_4	PHYLL_4_X	PHYLL_4_X_sp.
ASV_1365	0	0	0	0	0	31	0	0	0	0	0	0	0.999987586	Eukaryota	Stramenopiles	Ochrophyta	Bacillariophyta	Bacillariophyta_X	Polar-centric-Mediophyceae
ASV_1366	0	0	0	0	0	31	0	0	0	0	0	0	0.984486867	Eukaryota	Alveolata	Dinoflagellata	Dinophyceae	Dinophyceae_X	Dinophyceae_XX	Dinophyceae_XXX	Dinophyceae_XXX_sp.
ASV_1367	0	0	0	31	0	0	0	0	0	0	0	0	0.988662696	Eukaryota	Alveolata	Dinoflagellata	Dinophyceae	Dinophyceae_X	Dinophyceae_XX	Dinophyceae_XXX	Dinophyceae_XXX_sp.
ASV_1368	0	0	0	31	0	0	0	0	0	0	0	0	0.996477583	Eukaryota	Alveolata	Dinoflagellata	Dinophyceae	Dinophyceae_X	Dinophyceae_XX	Dinophyceae_XXX	Dinophyceae_XXX_sp.
ASV_1369	0	0	0	31	0	0	0	0	0	0	0	0	0.743961449	Eukaryota	Alveolata	Dinoflagellata	Dinophyceae	Dinophyceae_X	Dinophyceae_XX	Dinophyceae_XXX	Dinophyceae_XXX_sp.
ASV_1370	12	18	0	0	0	0	0	0	0	0	0	0	0.999998112	Eukaryota	Stramenopiles	Ochrophyta	MOCH-2	MOCH-2_X	MOCH-2_XX	MOCH-2_XXX	MOCH-2_XXX_sp.
ASV_1371	6	18	6	0	0	0	0	0	0	0	0	0	1	Eukaryota	Stramenopiles	Ochrophyta	MOCH-2	MOCH-2_X	MOCH-2_XX	MOCH-2_XXX	MOCH-2_XXX_sp.
ASV_1372	11	19	0	0	0	0	0	0	0	0	0	0	0.938606324	Eukaryota	Alveolata	Dinoflagellata	Syndiniales	Dino-Group-II
ASV_1373	0	22	2	0	0	6	0	0	0	0	0	0	0.937098926	Eukaryota	Alveolata	Dinoflagellata	Syndiniales	Dino-Group-II	Dino-Group-II_X	Dino-Group-II_XX	Dino-Group-II_XX_sp.
ASV_1374	15	15	0	0	0	0	0	0	0	0	0	0	0.995609222	Eukaryota	Alveolata	Dinoflagellata	Syndiniales	Dino-Group-II	Dino-Group-II-Clade-10-and-11	Dino-Group-II-Clade-10-and-11_X	Dino-Group-II-Clade-10-and-11_X_sp.
ASV_1375	6	20	0	4	0	0	0	0	0	0	0	0	0.709853366	Eukaryota	Archaeplastida	Streptophyta
ASV_1376	7	13	10	0	0	0	0	0	0	0	0	0	0.852872983	Eukaryota	Stramenopiles	Pseudofungi	MAST-2	MAST-2B	MAST-2B_X	MAST-2B_XX	MAST-2B_XX_sp.
ASV_1377	0	0	0	0	0	0	0	0	0	0	0	30	0.905865939	Eukaryota	Opisthokonta	Fungi
ASV_1378	0	0	0	0	0	0	1	15	14	0	0	0	1	Eukaryota	Alveolata	Dinoflagellata	Syndiniales	Dino-Group-II	Dino-Group-II-Clade-17	Dino-Group-II-Clade-17_X	Dino-Group-II-Clade-17_X_sp.
ASV_1379	0	0	0	0	18	12	0	0	0	0	0	0	0.870709049	Eukaryota	Alveolata	Dinoflagellata
ASV_1380	0	0	0	0	0	30	0	0	0	0	0	0	0.843669036	Eukaryota	Alveolata	Dinoflagellata	Dinophyceae	Dinophyceae_X	Dinophyceae_XX	Dinophyceae_XXX	Dinophyceae_XXX_sp.
ASV_1381	30	0	0	0	0	0	0	0	0	0	0	0	0.999999999	Eukaryota	Alveolata	Ciliophora	Spirotrichea	Tintinnida
ASV_1382	30	0	0	0	0	0	0	0	0	0	0	0	0.993580391	Eukaryota	Alveolata	Dinoflagellata	Dinophyceae	Dinophyceae_X	Dinophyceae_XX	Dinophyceae_XXX	Dinophyceae_XXX_sp.
ASV_1383	30	0	0	0	0	0	0	0	0	0	0	0	0.994340106	Eukaryota	Alveolata	Dinoflagellata	Dinophyceae	Dinophyceae_X	Dinophyceae_XX	Dinophyceae_XXX	Dinophyceae_XXX_sp.
ASV_1384	0	0	0	0	30	0	0	0	0	0	0	0	0.999999986	Eukaryota	Stramenopiles	Opalozoa	MAST-3	MAST-3I	MAST-3I_X	MAST-3I_XX	MAST-3I_XX_sp.
ASV_1385	0	0	14	16	0	0	0	0	0	0	0	0	0.708950542	Eukaryota	Hacrobia	Haptophyta	Prymnesiophyceae	Prymnesiales
ASV_1386	0	0	0	30	0	0	0	0	0	0	0	0	0.732651011	Eukaryota	Stramenopiles	Opalozoa	Bicoecea	Anoecales	Cafeteriaceae	Pseudobodo	Pseudobodo_sp.
ASV_1387	0	0	0	30	0	0	0	0	0	0	0	0	0.933815119	Eukaryota	Alveolata	Dinoflagellata	Dinophyceae
ASV_1388	0	0	0	30	0	0	0	0	0	0	0	0	0.99999834	Eukaryota	Stramenopiles	Sagenista	MAST-7	MAST-7D	MAST-7D_X	MAST-7D_XX	MAST-7D_XX_sp.
ASV_1389	0	29	0	0	0	0	0	0	0	0	0	0	0.730711183	Eukaryota	Alveolata	Ciliophora	Spirotrichea	Strombidiida	Strombidiidae
ASV_1390	16	10	0	0	3	0	0	0	0	0	0	0	0.930012644	Eukaryota	Alveolata	Dinoflagellata
ASV_1391	0	29	0	0	0	0	0	0	0	0	0	0	1	Eukaryota	Alveolata	Dinoflagellata	Dinophyceae
ASV_1392	0	29	0	0	0	0	0	0	0	0	0	0	0.865244089	Eukaryota	Alveolata	Dinoflagellata	Syndiniales	Dino-Group-II	Dino-Group-II-Clade-5	Dino-Group-II-Clade-5_X	Dino-Group-II-Clade-5_X_sp.
ASV_1393	0	29	0	0	0	0	0	0	0	0	0	0	0.998097709	Eukaryota	Alveolata	Dinoflagellata	Dinophyceae	Dinophysiales	Oxyphysiaceae	Phalachroma	Phalacroma_rotundatum
ASV_1394	0	29	0	0	0	0	0	0	0	0	0	0	0.999999653	Eukaryota	Stramenopiles	Ochrophyta	MOCH-2	MOCH-2_X	MOCH-2_XX	MOCH-2_XXX	MOCH-2_XXX_sp.
ASV_1395	0	0	0	0	0	29	0	0	0	0	0	0	1	Eukaryota
ASV_1396	0	0	0	0	12	12	0	0	5	0	0	0	0.958660997	Eukaryota	Hacrobia	Haptophyta	Haptophyta_Clade_HAP5	Haptophyta_Clade_HAP5_X	Haptophyta_Clade_HAP5_XX	Haptophyta_Clade_HAP5_XXX	Haptophyta_Clade_HAP5_XXX_sp.
ASV_1397	9	0	0	20	0	0	0	0	0	0	0	0	0.999999963	Eukaryota	Alveolata	Dinoflagellata	Syndiniales	Dino-Group-II	Dino-Group-II-Clade-14	Dino-Group-II-Clade-14_X	Dino-Group-II-Clade-14_X_sp.
ASV_1398	0	0	0	0	0	0	0	0	29	0	0	0	0.997286883	Eukaryota	Stramenopiles	Ochrophyta	Pelagophyceae	Pelagomonadales	Pelagomonadaceae	Pelagomonas	Pelagomonas_calceolata
ASV_1399	0	0	0	29	0	0	0	0	0	0	0	0	0.764537902	Eukaryota	Hacrobia	Haptophyta	Prymnesiophyceae	Calcihaptophycidae	Chrysoculteraceae	Chrysoculter	Chrysoculter_rhomboideus
ASV_1400	0	0	0	29	0	0	0	0	0	0	0	0	0.975963522	Eukaryota	Alveolata	Dinoflagellata	Dinophyceae	Dinophyceae_X	Dinophyceae_XX	Dinophyceae_XXX	Dinophyceae_XXX_sp.
ASV_1401	0	0	0	29	0	0	0	0	0	0	0	0	0.993932329	Eukaryota	Alveolata	Dinoflagellata	Dinophyceae	Dinophyceae_X	Dinophyceae_XX	Dinophyceae_XXX	Dinophyceae_XXX_sp.
ASV_1402	0	0	0	29	0	0	0	0	0	0	0	0	0.99978704	Eukaryota	Alveolata	Dinoflagellata	Noctilucophyceae	Noctilucales	Kofoidiniaceae	Kofoidinium	Kofoidinium_pavillardii
ASV_1403	0	28	0	0	0	0	0	0	0	0	0	0	1	Eukaryota	Alveolata	Dinoflagellata	Syndiniales	Dino-Group-II	Dino-Group-II-Clade-14	Dino-Group-II-Clade-14_X	Dino-Group-II-Clade-14_X_sp.
ASV_1404	0	28	0	0	0	0	0	0	0	0	0	0	1	Eukaryota	Alveolata	Dinoflagellata	Syndiniales	Dino-Group-II	Dino-Group-II-Clade-14	Dino-Group-II-Clade-14_X	Dino-Group-II-Clade-14_X_sp.
ASV_1405	0	7	0	0	0	21	0	0	0	0	0	0	0.999245352	Eukaryota	Rhizaria	Radiolaria	RAD-B	RAD-B_X	RAD-B-Group-IV	Spumellarian	Spumellarian_radiolarian
ASV_1406	0	28	0	0	0	0	0	0	0	0	0	0	0.925477715	Eukaryota	Hacrobia	Haptophyta	Prymnesiophyceae	Prymnesiales	Chrysochromulinaceae	Chrysochromulina
ASV_1407	0	28	0	0	0	0	0	0	0	0	0	0	0.973413629	Eukaryota	Alveolata	Dinoflagellata	Dinophyceae	Dinophyceae_X	Dinophyceae_XX	Dinophyceae_XXX	Dinophyceae_XXX_sp.
ASV_1408	12	15	1	0	0	0	0	0	0	0	0	0	0.871304391	Eukaryota	Alveolata	Dinoflagellata	Syndiniales	Dino-Group-I	Dino-Group-I-Clade-5	Dino-Group-I-Clade-5_X	Dino-Group-I-Clade-5_X_sp.
ASV_1409	0	28	0	0	0	0	0	0	0	0	0	0	0.801322985	Eukaryota	Alveolata	Dinoflagellata	Syndiniales	Dino-Group-II	Dino-Group-II-Clade-12	Dino-Group-II-Clade-12_X	Dino-Group-II-Clade-12_X_sp.
ASV_1410	0	17	0	11	0	0	0	0	0	0	0	0	0.906516592	Eukaryota	Alveolata	Dinoflagellata	Syndiniales	Dino-Group-II
ASV_1411	2	9	14	3	0	0	0	0	0	0	0	0	0.999348156	Eukaryota	Hacrobia	Cryptophyta	Cryptophyceae	Goniomonadales	Goniomonadales_X	Goniomonas	Goniomonas_sp.
ASV_1412	0	28	0	0	0	0	0	0	0	0	0	0	0.991544303	Eukaryota	Stramenopiles	Ochrophyta	Dictyochophyceae	Dictyochophyceae_X	Dictyochophyceae_XX	Dictyochophyceae_XXX	Dictyochophyceae_XXX_sp.
ASV_1413	3	18	3	2	0	0	0	0	2	0	0	0	0.999997777	Eukaryota	Alveolata	Ciliophora	Phyllopharyngea	Cyrtophoria_7	Hartmannulidae	Hartmannulidae_X	Hartmannulidae_X_sp.
ASV_1414	0	0	0	0	0	0	0	0	0	0	0	28	0.845514342	Eukaryota	Opisthokonta	Choanoflagellida	Choanoflagellida_X	Choanoflagellida_XX	Choanoflagellida_XX_Clade-3	Choanoflagellida_XX_Clade-3_X	Choanoflagellida_XX_Clade-3_X_sp.
ASV_1415	0	0	0	0	0	0	0	0	0	0	0	28	0.911488615	Eukaryota	Opisthokonta	Fungi	Chytridiomycota	Chytridiomycotina	Chytridiomycetes	Aphelidium	Aphelidium_sp.
ASV_1416	0	0	0	0	0	0	9	8	5	1	0	0	0.999971141	Eukaryota	Alveolata	Dinoflagellata	Syndiniales	Dino-Group-II	Dino-Group-II-Clade-1	Dino-Group-II-Clade-1_X	Dino-Group-II-Clade-1_X_sp.
ASV_1417	0	0	0	0	0	0	7	4	17	0	0	0	0.989503979	Eukaryota	Archaeplastida	Chlorophyta	Mamiellophyceae
ASV_1418	0	0	0	0	0	0	17	0	11	0	0	0	0.819120538	Eukaryota	Rhizaria	Cercozoa	Filosa-Granofilosea	Filosa-Granofilosea_X	Novel-Gran-5	Novel-Gran-5_X	Novel-Gran-5_X_sp.
ASV_1419	28	0	0	0	0	0	0	0	0	0	0	0	0.852704523	Eukaryota	Alveolata	Dinoflagellata	Syndiniales	Dino-Group-II	Dino-Group-II-Clade-47	Dino-Group-II-Clade-47_X	Dino-Group-II-Clade-47_X_sp.
ASV_1420	28	0	0	0	0	0	0	0	0	0	0	0	0.999999865	Eukaryota	Alveolata	Dinoflagellata	Syndiniales	Dino-Group-II	Dino-Group-II-Clade-1	Dino-Group-II-Clade-1_X	Dino-Group-II-Clade-1_X_sp.
ASV_1421	28	0	0	0	0	0	0	0	0	0	0	0	0.999997803	Eukaryota	Alveolata	Dinoflagellata	Syndiniales	Dino-Group-II	Dino-Group-II-Clade-1	Dino-Group-II-Clade-1_X	Dino-Group-II-Clade-1_X_sp.
ASV_1422	28	0	0	0	0	0	0	0	0	0	0	0	0.941062657	Eukaryota	Alveolata	Dinoflagellata	Dinophyceae	Dinophyceae_X	Dinophyceae_XX	Dinophyceae_XXX	Dinophyceae_XXX_sp.
ASV_1423	28	0	0	0	0	0	0	0	0	0	0	0	0.997617473	Eukaryota	Hacrobia	Haptophyta	Prymnesiophyceae	Prymnesiophyceae_X	Braarudosphaeraceae	Braarudosphaera	Chrysochromulina_parkeae
ASV_1424	0	0	0	0	28	0	0	0	0	0	0	0	0.72708482	Eukaryota	Stramenopiles	Ochrophyta	Bacillariophyta	Bacillariophyta_X	Polar-centric-Mediophyceae	Thalassiosira
ASV_1425	0	0	0	0	0	0	0	0	28	0	0	0	0.999983393	Eukaryota	Alveolata	Dinoflagellata	Syndiniales	Dino-Group-I	Dino-Group-I-Clade-4	Dino-Group-I-Clade-4_X	Dino-Group-I-Clade-4_X_sp.
ASV_1426	0	0	28	0	0	0	0	0	0	0	0	0	1	Eukaryota	Alveolata	Dinoflagellata	Syndiniales	Dino-Group-II	Dino-Group-II-Clade-17	Dino-Group-II-Clade-17_X	Dino-Group-II-Clade-17_X_sp.
ASV_1427	0	0	28	0	0	0	0	0	0	0	0	0	1	Eukaryota
ASV_1429	0	0	0	28	0	0	0	0	0	0	0	0	0.928756455	Eukaryota	Stramenopiles	Stramenopiles_X	MAST-25	MAST-25_X	MAST-25_XX	MAST-25_XXX	MAST-25_XXX_sp.
ASV_1430	0	0	0	28	0	0	0	0	0	0	0	0	0.997992168	Eukaryota	Hacrobia	Haptophyta	Prymnesiophyceae	Prymnesiales	Chrysochromulinaceae	Chrysochromulina
ASV_1431	0	0	0	28	0	0	0	0	0	0	0	0	0.999999927	Eukaryota	Alveolata	Dinoflagellata	Syndiniales	Dino-Group-II	Dino-Group-II-Clade-1	Dino-Group-II-Clade-1_X	Dino-Group-II-Clade-1_X_sp.
ASV_1432	0	0	0	28	0	0	0	0	0	0	0	0	0.999993565	Eukaryota	Alveolata	Dinoflagellata	Syndiniales	Dino-Group-II	Dino-Group-II-Clade-10-and-11	Dino-Group-II-Clade-10-and-11_X	Dino-Group-II-Clade-10-and-11_X_sp.
ASV_1433	0	0	0	28	0	0	0	0	0	0	0	0	0.99851917	Eukaryota	Alveolata	Dinoflagellata	Syndiniales	Dino-Group-II
ASV_1434	0	0	0	28	0	0	0	0	0	0	0	0	0.999771509	Eukaryota	Archaeplastida	Chlorophyta	Pyramimonadales	Pyramimonadales_X	Pyramimonadales_XX	Halosphaera	Halosphaera_sp.
ASV_1435	0	0	0	28	0	0	0	0	0	0	0	0	0.998468639	Eukaryota	Alveolata	Dinoflagellata	Syndiniales	Dino-Group-II	Dino-Group-II-Clade-3	Dino-Group-II-Clade-3_X	Dino-Group-II-Clade-3_X_sp.
ASV_1436	0	27	0	0	0	0	0	0	0	0	0	0	0.780642995	Eukaryota	Stramenopiles
ASV_1437	14	7	5	1	0	0	0	0	0	0	0	0	0.999999956	Eukaryota	Alveolata	Dinoflagellata	Noctilucophyceae	Noctilucales	Kofoidiniaceae	Kofoidinium	Kofoidinium_sp.
ASV_1438	0	27	0	0	0	0	0	0	0	0	0	0	1	Eukaryota	Stramenopiles	Opalozoa	MAST-3	MAST-3I	MAST-3I_X	MAST-3I_XX	MAST-3I_XX_sp.
ASV_1439	22	5	0	0	0	0	0	0	0	0	0	0	0.948552326	Eukaryota	Stramenopiles	Ochrophyta	MOCH-5	MOCH-5_X	MOCH-5_XX	MOCH-5_XXX	MOCH-5_XXX_sp.
ASV_1440	0	27	0	0	0	0	0	0	0	0	0	0	0.728354514	Eukaryota	Opisthokonta	Fungi	Chytridiomycota	Chytridiomycotina	Chytridiomycetes	Aphelidium	Aphelidium_sp.
ASV_1441	19	8	0	0	0	0	0	0	0	0	0	0	0.918901523	Eukaryota	Alveolata	Dinoflagellata	Dinophyceae	Dinophyceae_X	Dinophyceae_XX	Dinophyceae_XXX	Dinophyceae_XXX_sp.
ASV_1442	0	27	0	0	0	0	0	0	0	0	0	0	0.84954375	Eukaryota	Alveolata	Dinoflagellata	Syndiniales	Dino-Group-II
ASV_1443	13	13	0	1	0	0	0	0	0	0	0	0	0.913137619	Eukaryota	Alveolata	Dinoflagellata	Dinophyceae	Dinophyceae_X	Dinophyceae_XX	Dinophyceae_XXX	Dinophyceae_XXX_sp.
ASV_1444	0	5	0	22	0	0	0	0	0	0	0	0	0.972135457	Eukaryota	Alveolata	Dinoflagellata	Syndiniales	Dino-Group-II
ASV_1445	16	11	0	0	0	0	0	0	0	0	0	0	1	Eukaryota	Alveolata	Dinoflagellata	Syndiniales	Dino-Group-II	Dino-Group-II-Clade-17	Dino-Group-II-Clade-17_X	Dino-Group-II-Clade-17_X_sp.
ASV_1446	0	27	0	0	0	0	0	0	0	0	0	0	0.866758885	Eukaryota	Rhizaria	Radiolaria	Polycystinea	Collodaria	Sphaerozoidae	Sphaerozoum
ASV_1447	27	0	0	0	0	0	0	0	0	0	0	0	0.998986442	Eukaryota	Alveolata	Dinoflagellata	Syndiniales	Dino-Group-II	Dino-Group-II-Clade-1	Dino-Group-II-Clade-1_X	Dino-Group-II-Clade-1_X_sp.
ASV_1448	27	0	0	0	0	0	0	0	0	0	0	0	0.966415858	Eukaryota	Rhizaria	Radiolaria	Polycystinea	Nassellaria	Plagiacanthoidea	Pseudocubus	Pseudocubus_obeliscus
ASV_1449	0	0	0	0	0	0	0	0	0	0	0	0	0.978071119	Eukaryota	Rhizaria	Radiolaria	Polycystinea	Spumellarida	Spumellarida_X	Spumellarida_XX	Spumellarida_XX_sp.
ASV_1450	0	0	0	27	0	0	0	0	0	0	0	0	0.999601472	Eukaryota	Alveolata	Dinoflagellata	Syndiniales	Dino-Group-II	Dino-Group-II-Clade-10-and-11	Dino-Group-II-Clade-10-and-11_X	Dino-Group-II-Clade-10-and-11_X_sp.
ASV_1451	0	0	0	27	0	0	0	0	0	0	0	0	0.999845608	Eukaryota	Alveolata	Dinoflagellata	Syndiniales	Dino-Group-II
ASV_1452	0	0	0	27	0	0	0	0	0	0	0	0	0.997721557	Eukaryota	Alveolata	Dinoflagellata	Syndiniales	Dino-Group-II
ASV_1453	0	0	0	27	0	0	0	0	0	0	0	0	0.997328552	Eukaryota	Alveolata	Dinoflagellata	Dinophyceae
ASV_1454	0	6	0	0	0	20	0	0	0	0	0	0	0.953308593	Eukaryota	Hacrobia	Haptophyta	Haptophyta_Clade_HAP5	Haptophyta_Clade_HAP5_X	Haptophyta_Clade_HAP5_XX	Haptophyta_Clade_HAP5_XXX	Haptophyta_Clade_HAP5_XXX_sp.
ASV_1455	0	26	0	0	0	0	0	0	0	0	0	0	0.999747407	Eukaryota	Hacrobia	Picozoa	Picozoa_X	Picozoa_XX	Picozoa_XXX	Picomonas	Picomonas_judraskeda
ASV_1456	0	26	0	0	0	0	0	0	0	0	0	0	0.95793705	Eukaryota	Hacrobia	Haptophyta	Prymnesiophyceae	Prymnesiales	Prymnesiaceae	Prymnesium
ASV_1457	0	26	0	0	0	0	0	0	0	0	0	0	0.999881694	Eukaryota	Alveolata	Dinoflagellata	Syndiniales	Dino-Group-II	Dino-Group-II-Clade-17	Dino-Group-II-Clade-17_X	Dino-Group-II-Clade-17_X_sp.
ASV_1458	0	14	12	0	0	0	0	0	0	0	0	0	0.95955882	Eukaryota	Alveolata	Dinoflagellata
ASV_1459	0	26	0	0	0	0	0	0	0	0	0	0	0.993623633	Eukaryota	Alveolata	Dinoflagellata	Dinophyceae	Dinophyceae_X	Dinophyceae_XX	Dinophyceae_XXX	Dinophyceae_XXX_sp.
ASV_1460	0	26	0	0	0	0	0	0	0	0	0	0	0.99999524	Eukaryota	Alveolata	Dinoflagellata	Syndiniales	Dino-Group-II	Dino-Group-II-Clade-1	Dino-Group-II-Clade-1_X	Dino-Group-II-Clade-1_X_sp.
ASV_1461	0	0	0	0	0	0	0	0	0	0	0	26	0.944871632	Eukaryota	Alveolata	Dinoflagellata	Syndiniales	Dino-Group-II	Dino-Group-II_X	Dino-Group-II_XX	Dino-Group-II_XX_sp.
ASV_1462	0	0	0	0	0	0	0	4	9	0	0	8	0.995871973	Eukaryota	Hacrobia	Haptophyta	Prymnesiophyceae
ASV_1463	26	0	0	0	0	0	0	0	0	0	0	0	0.999999972	Eukaryota	Alveolata	Dinoflagellata	Syndiniales	Dino-Group-II	Dino-Group-II-Clade-1	Dino-Group-II-Clade-1_X	Dino-Group-II-Clade-1_X_sp.
ASV_1464	26	0	0	0	0	0	0	0	0	0	0	0	0.99113945	Eukaryota	Alveolata	Dinoflagellata
ASV_1465	19	0	0	7	0	0	0	0	0	0	0	0	0.713900076	Eukaryota	Opisthokonta	Fungi
ASV_1466	0	0	0	26	0	0	0	0	0	0	0	0	0.799460399	Eukaryota	Stramenopiles	Ochrophyta	Chrysophyceae	Chrysophyceae_X
ASV_1467	0	0	0	26	0	0	0	0	0	0	0	0	0.727092889	Eukaryota	Rhizaria	Radiolaria	Acantharea	Arthracanthida-Symphyacanthida	Arthracanthida-Symphyacanthida_X	Phractopelta	Phractopelta_sarmentosa
ASV_1468	0	0	0	26	0	0	0	0	0	0	0	0	0.996782529	Eukaryota	Alveolata	Dinoflagellata	Dinophyceae	Dinophyceae_X	Dinophyceae_XX	Dinophyceae_XXX	Dinophyceae_XXX_sp.
ASV_1469	0	8	0	0	0	17	0	0	0	0	0	0	0.928462459	Eukaryota	Rhizaria	Radiolaria	Acantharea	Arthracanthida-Symphyacanthida	Arthracanthida-Symphyacanthida_X	Acanthostaurus	Acanthostaurus_purpurascens
ASV_1470	0	25	0	0	0	0	0	0	0	0	0	0	0.792731481	Eukaryota	Opisthokonta	Fungi	Chytridiomycota	Chytridiomycotina	Chytridiomycetes
ASV_1471	19	4	0	0	2	0	0	0	0	0	0	0	0.999829041	Eukaryota	Alveolata	Ciliophora	Spirotrichea	Choreotrichida	Leegaardiellidae_B	Leegaardiella	Leegaardiella_sp.
ASV_1472	0	12	0	13	0	0	0	0	0	0	0	0	0.999999483	Eukaryota	Alveolata	Dinoflagellata	Syndiniales	Dino-Group-II	Dino-Group-II-Clade-1	Dino-Group-II-Clade-1_X	Dino-Group-II-Clade-1_X_sp.
ASV_1473	0	25	0	0	0	0	0	0	0	0	0	0	0.871550391	Eukaryota	Alveolata	Dinoflagellata	Dinophyceae	Gymnodiniales	Chytriodiniaceae	Dissodinium	Dissodinium_pseudolunula
ASV_1474	17	8	0	0	0	0	0	0	0	0	0	0	0.84304936	Eukaryota	Alveolata	Dinoflagellata	Syndiniales	Dino-Group-II	Dino-Group-II-Clade-1	Dino-Group-II-Clade-1_X	Dino-Group-II-Clade-1_X_sp.
ASV_1475	0	0	0	0	0	0	0	0	0	0	0	25	0.97117876	Eukaryota	Stramenopiles	Sagenista	Labyrinthulomycetes	Thraustochytriales	Thraustochytriaceae	Labyrinthuloides	Labyrinthuloides_haliotidis
ASV_1476	0	0	0	0	0	11	0	5	0	1	0	6	0.9986188	Eukaryota	Alveolata	Dinoflagellata	Syndiniales	Dino-Group-II	Dino-Group-II-Clade-10-and-11	Dino-Group-II-Clade-10-and-11_X	Dino-Group-II-Clade-10-and-11_X_sp.
ASV_1477	0	0	0	0	0	0	25	0	0	0	0	0	1	Eukaryota
ASV_1478	25	0	0	0	0	0	0	0	0	0	0	0	0.997339959	Eukaryota	Alveolata	Dinoflagellata	Dinophyceae	Dinophyceae_X	Dinophyceae_XX	Dinophyceae_XXX	Dinophyceae_XXX_sp.
ASV_1479	25	0	0	0	0	0	0	0	0	0	0	0	0.999701815	Eukaryota	Alveolata	Dinoflagellata	Syndiniales	Dino-Group-II
ASV_1480	25	0	0	0	0	0	0	0	0	0	0	0	0.745101991	Eukaryota	Alveolata	Dinoflagellata	Syndiniales	Dino-Group-IV	Dino-Group-IV-Syndinium-Group	Syndinium	Syndinium_turbo
ASV_1481	25	0	0	0	0	0	0	0	0	0	0	0	0.762415933	Eukaryota	Hacrobia	Haptophyta	Prymnesiophyceae	Prymnesiales	Chrysochromulinaceae	Chrysochromulina
ASV_1482	25	0	0	0	0	0	0	0	0	0	0	0	0.790457465	Eukaryota	Alveolata	Ciliophora	Spirotrichea	Strombidiida	Strombidiidae
ASV_1483	0	0	0	25	0	0	0	0	0	0	0	0	1	Eukaryota	Alveolata	Dinoflagellata	Syndiniales	Dino-Group-II	Dino-Group-II-Clade-14	Dino-Group-II-Clade-14_X	Dino-Group-II-Clade-14_X_sp.
ASV_1484	0	0	0	25	0	0	0	0	0	0	0	0	0.983797677	Eukaryota	Hacrobia	Haptophyta	Prymnesiophyceae	Prymnesiales	Chrysochromulinaceae	Chrysochromulina
ASV_1485	0	0	0	25	0	0	0	0	0	0	0	0	0.987098102	Eukaryota	Alveolata	Dinoflagellata	Dinophyceae	Dinophyceae_X	Dinophyceae_XX	Dinophyceae_XXX	Dinophyceae_XXX_sp.
ASV_1486	0	0	0	25	0	0	0	0	0	0	0	0	0.7510449	Eukaryota	Alveolata	Dinoflagellata	Dinophyceae	Gymnodiniales	Chytriodiniaceae	Dissodinium	Dissodinium_pseudolunula
ASV_1487	0	0	0	25	0	0	0	0	0	0	0	0	0.938258931	Eukaryota	Alveolata	Dinoflagellata	Dinophyceae	Dinophyceae_X	Dinophyceae_XX	Dinophyceae_XXX	Dinophyceae_XXX_sp.
ASV_1488	0	0	0	25	0	0	0	0	0	0	0	0	0.998075961	Eukaryota	Alveolata	Dinoflagellata	Syndiniales	Dino-Group-II	Dino-Group-II-Clade-10-and-11	Dino-Group-II-Clade-10-and-11_X	Dino-Group-II-Clade-10-and-11_X_sp.
ASV_1489	0	0	0	25	0	0	0	0	0	0	0	0	0.837687286	Eukaryota	Alveolata	Dinoflagellata	Syndiniales	Dino-Group-II	Dino-Group-II-Clade-6	Dino-Group-II-Clade-6_X	Dino-Group-II-Clade-6_X_sp.
ASV_1490	0	1	0	0	0	0	0	0	0	6	8	9	0.999999999	Eukaryota	Alveolata	Dinoflagellata	Syndiniales	Dino-Group-II	Dino-Group-II-Clade-1	Dino-Group-II-Clade-1_X	Dino-Group-II-Clade-1_X_sp.
ASV_1491	7	10	7	0	0	0	0	0	0	0	0	0	1	Eukaryota	Alveolata	Dinoflagellata	Syndiniales	Dino-Group-II	Dino-Group-II-Clade-14	Dino-Group-II-Clade-14_X	Dino-Group-II-Clade-14_X_sp.
ASV_1492	0	24	0	0	0	0	0	0	0	0	0	0	0.979624794	Eukaryota	Alveolata	Dinoflagellata	Dinophyceae	Dinophyceae_X	Dinophyceae_XX	Dinophyceae_XXX	Dinophyceae_XXX_sp.
ASV_1493	0	24	0	0	0	0	0	0	0	0	0	0	0.897463442	Eukaryota	Hacrobia	Picozoa	Picozoa_X	Picozoa_XX	Picozoa_XXX	Picomonas	Picomonas_judraskeda
ASV_1494	0	24	0	0	0	0	0	0	0	0	0	0	0.999523298	Eukaryota	Stramenopiles	Sagenista	MAST-8	MAST-8D	MAST-8D_X	MAST-8D_XX	MAST-8D_XX_sp.
ASV_1495	0	24	0	0	0	0	0	0	0	0	0	0	0.999999929	Eukaryota	Hacrobia	Haptophyta	Prymnesiophyceae
ASV_1496	0	24	0	0	0	0	0	0	0	0	0	0	0.965220742	Eukaryota	Hacrobia	Haptophyta	Prymnesiophyceae	Prymnesiales	Chrysochromulinaceae	Chrysochromulina
ASV_1497	20	4	0	0	0	0	0	0	0	0	0	0	0.92590448	Eukaryota	Alveolata	Dinoflagellata	Syndiniales	Dino-Group-II
ASV_1498	0	5	3	16	0	0	0	0	0	0	0	0	0.981352888	Eukaryota	Alveolata	Dinoflagellata	Syndiniales	Dino-Group-II	Dino-Group-II_X	Dino-Group-II_XX	Dino-Group-II_XX_sp.
ASV_1499	0	24	0	0	0	0	0	0	0	0	0	0	0.912742992	Eukaryota	Alveolata	Dinoflagellata	Syndiniales	Dino-Group-II	Dino-Group-II-Clade-4
ASV_1500	0	24	0	0	0	0	0	0	0	0	0	0	0.886359079	Eukaryota	Stramenopiles	Ochrophyta
ASV_1501	0	0	0	0	0	0	0	0	0	0	0	24	0.71442367	Eukaryota	Opisthokonta	Fungi
ASV_1502	0	0	0	0	0	0	0	0	0	0	0	24	0.830407029	Eukaryota	Stramenopiles	Ochrophyta	Bacillariophyta	Bacillariophyta_X	Raphid-pennate	Pseudo-nitzschia	Pseudo-nitzschia_cf_cuspidata
ASV_1503	0	0	0	0	0	0	14	10	0	0	0	0	0.98600764	Eukaryota	Stramenopiles	Sagenista	Labyrinthulomycetes	Labyrinthulales	Labyrinthulaceae	Labyrinthulaceae_X	Labyrinthulaceae_X_sp.
ASV_1505	0	0	0	0	0	24	0	0	0	0	0	0	0.999970094	Eukaryota	Rhizaria	Radiolaria	Acantharea	Arthracanthida-Symphyacanthida	Arthracanthida-Symphyacanthida_X
ASV_1506	0	0	0	0	0	24	0	0	0	0	0	0	0.999659842	Eukaryota	Alveolata	Dinoflagellata	Syndiniales	Dino-Group-I	Dino-Group-I-Clade-4	Dino-Group-I-Clade-4_X	Dino-Group-I-Clade-4_X_sp.
ASV_1507	0	0	8	0	0	16	0	0	0	0	0	0	0.999668852	Eukaryota	Hacrobia	Telonemia	Telonemia_X	Telonemia_XX	Telonemia-Group-2	Telonema-Group-2	Telonema_antarcticum
ASV_1508	24	0	0	0	0	0	0	0	0	0	0	0	0.999999998	Eukaryota	Alveolata	Dinoflagellata	Syndiniales	Dino-Group-II	Dino-Group-II-Clade-1	Dino-Group-II-Clade-1_X	Dino-Group-II-Clade-1_X_sp.
ASV_1509	24	0	0	0	0	0	0	0	0	0	0	0	0.999871903	Eukaryota	Alveolata	Dinoflagellata	Dinophyceae
ASV_1510	24	0	0	0	0	0	0	0	0	0	0	0	0.909481233	Eukaryota	Stramenopiles
ASV_1511	0	0	0	0	0	0	0	0	24	0	0	0	0.973944223	Eukaryota	Rhizaria	Cercozoa	Filosa-Thecofilosea	Cryomonadida	Protaspa-lineage	Protaspa	Protaspa_grandis
ASV_1512	0	0	0	0	0	0	0	0	0	0	0	0	0.968203968	Eukaryota	Alveolata	Dinoflagellata	Dinophyceae	Dinophyceae_X	Dinophyceae_XX	Dinophyceae_XXX	Dinophyceae_XXX_sp.
ASV_1513	0	0	0	24	0	0	0	0	0	0	0	0	1	Eukaryota	Alveolata	Dinoflagellata	Dinophyceae
ASV_1514	0	0	0	24	0	0	0	0	0	0	0	0	1	Eukaryota
ASV_1515	0	0	0	24	0	0	0	0	0	0	0	0	0.997090651	Eukaryota	Hacrobia	Picozoa	Picozoa_X	Picozoa_XX	Picozoa_XXX	Picomonas	Picomonas_judraskeda
ASV_1516	0	0	0	24	0	0	0	0	0	0	0	0	0.992948214	Eukaryota	Stramenopiles	Ochrophyta	Dictyochophyceae	Dictyochophyceae_X
ASV_1517	0	0	0	24	0	0	0	0	0	0	0	0	0.999979192	Eukaryota	Hacrobia	Haptophyta	Prymnesiophyceae
ASV_1518	0	0	0	24	0	0	0	0	0	0	0	0	0.905708105	Eukaryota	Alveolata	Dinoflagellata	Dinophyceae	Dinophyceae_X	Dinophyceae_XX	Dinophyceae_XXX	Dinophyceae_XXX_sp.
ASV_1519	0	0	0	24	0	0	0	0	0	0	0	0	0.999999681	Eukaryota	Alveolata	Dinoflagellata	Dinophyceae
ASV_1520	0	0	0	24	0	0	0	0	0	0	0	0	0.99899005	Eukaryota	Alveolata	Dinoflagellata
ASV_1521	0	0	0	24	0	0	0	0	0	0	0	0	0.99998736	Eukaryota	Alveolata	Dinoflagellata	Syndiniales	Dino-Group-II	Dino-Group-II-Clade-33	Dino-Group-II-Clade-33_X	Dino-Group-II-Clade-33_X_sp.
ASV_1522	0	0	0	24	0	0	0	0	0	0	0	0	0.993665174	Eukaryota	Alveolata	Dinoflagellata	Syndiniales	Dino-Group-II	Dino-Group-II-Clade-3	Dino-Group-II-Clade-3_X	Dino-Group-II-Clade-3_X_sp.
ASV_1523	10	13	0	0	0	0	0	0	0	0	0	0	1	Eukaryota
ASV_1524	8	15	0	0	0	0	0	0	0	0	0	0	0.999950294	Eukaryota	Alveolata	Ciliophora	Spirotrichea	Choreotrichida	Leegaardiellidae_B	Leegaardiella	Leegaardiella_sp.
ASV_1525	0	16	0	7	0	0	0	0	0	0	0	0	0.955397382	Eukaryota	Stramenopiles
ASV_1526	0	23	0	0	0	0	0	0	0	0	0	0	0.999999993	Eukaryota	Stramenopiles	Opalozoa	MAST-3	MAST-3I	MAST-3I_X	MAST-3I_XX	MAST-3I_XX_sp.
ASV_1527	0	23	0	0	0	0	0	0	0	0	0	0	0.999999651	Eukaryota	Alveolata	Ciliophora	Spirotrichea	Choreotrichida	Leegaardiellidae_B	Leegaardiella	Leegaardiella_sp.
ASV_1528	0	23	0	0	0	0	0	0	0	0	0	0	0.805479697	Eukaryota	Stramenopiles	Ochrophyta
ASV_1529	0	23	0	0	0	0	0	0	0	0	0	0	0.753487102	Eukaryota	Opisthokonta	Choanoflagellida	Choanoflagellatea	Acanthoecida	Stephanoecidae_Group_E	Stephanoecidae_Group_E_X	Stephanoecidae_Group_E_X_sp.
ASV_1530	0	23	0	0	0	0	0	0	0	0	0	0	0.999926299	Eukaryota	Alveolata	Dinoflagellata	Syndiniales	Dino-Group-II	Dino-Group-II-Clade-1	Dino-Group-II-Clade-1_X	Dino-Group-II-Clade-1_X_sp.
ASV_1531	1	9	0	13	0	0	0	0	0	0	0	0	0.897629228	Eukaryota	Alveolata	Dinoflagellata	Dinophyceae
ASV_1532	8	10	0	5	0	0	0	0	0	0	0	0	0.999999999	Eukaryota	Alveolata	Dinoflagellata	Syndiniales	Dino-Group-II	Dino-Group-II-Clade-16	Dino-Group-II-Clade-16_X	Dino-Group-II-Clade-16_X_sp.
ASV_1533	12	10	0	0	1	0	0	0	0	0	0	0	0.941136912	Eukaryota	Alveolata	Dinoflagellata	Syndiniales	Dino-Group-II	Dino-Group-II-Clade-9	Dino-Group-II-Clade-9_X	Dino-Group-II-Clade-9_X_sp.
ASV_1534	0	23	0	0	0	0	0	0	0	0	0	0	0.987066006	Eukaryota	Alveolata	Dinoflagellata	Syndiniales	Dino-Group-II	Dino-Group-II-Clade-12	Dino-Group-II-Clade-12_X	Dino-Group-II-Clade-12_X_sp.
ASV_1535	0	23	0	0	0	0	0	0	0	0	0	0	0.875485234	Eukaryota	Alveolata	Dinoflagellata	Dinophyceae	Gymnodiniales	Chytriodiniaceae	Dissodinium	Dissodinium_pseudolunula
ASV_1536	0	23	0	0	0	0	0	0	0	0	0	0	0.99999997	Eukaryota	Stramenopiles	Ochrophyta	MOCH-2	MOCH-2_X	MOCH-2_XX	MOCH-2_XXX	MOCH-2_XXX_sp.
ASV_1537	0	0	0	0	0	23	0	0	0	0	0	0	0.999994056	Eukaryota	Alveolata	Dinoflagellata	Syndiniales	Dino-Group-I	Dino-Group-I-Clade-1	Dino-Group-I-Clade-1_X	Dino-Group-I-Clade-1_X_sp.
ASV_1538	0	0	0	0	0	23	0	0	0	0	0	0	0.95501951	Eukaryota	Alveolata	Dinoflagellata	Dinophyceae	Dinophyceae_X	Dinophyceae_XX	Dinophyceae_XXX	Dinophyceae_XXX_sp.
ASV_1539	23	0	0	0	0	0	0	0	0	0	0	0	0.856668981	Eukaryota	Opisthokonta	Fungi	Chytridiomycota	Chytridiomycotina	Chytridiomycetes	Aphelidium	Aphelidium_sp.
ASV_1540	23	0	0	0	0	0	0	0	0	0	0	0	0.99998259	Eukaryota	Alveolata	Dinoflagellata	Dinophyceae
ASV_1542	17	0	0	6	0	0	0	0	0	0	0	0	0.992593131	Eukaryota	Alveolata	Ciliophora	Spirotrichea	Strombidiida	Tontoniidae_A	Spirotontonia	Spirotontonia_grandis
ASV_1543	12	0	0	11	0	0	0	0	0	0	0	0	0.999999791	Eukaryota	Alveolata	Dinoflagellata	Syndiniales	Dino-Group-II	Dino-Group-II-Clade-47	Dino-Group-II-Clade-47_X	Dino-Group-II-Clade-47_X_sp.
ASV_1544	8	0	0	15	0	0	0	0	0	0	0	0	0.966375491	Eukaryota	Alveolata	Dinoflagellata
ASV_1545	2	0	0	21	0	0	0	0	0	0	0	0	0.974094661	Eukaryota	Alveolata	Dinoflagellata	Syndiniales	Dino-Group-II	Dino-Group-II_X	Dino-Group-II_XX	Dino-Group-II_XX_sp.
ASV_1546	0	0	0	0	23	0	0	0	0	0	0	0	0.971178399	Eukaryota	Alveolata	Dinoflagellata	Syndiniales	Dino-Group-II	Dino-Group-II_X	Dino-Group-II_XX	Dino-Group-II_XX_sp.
ASV_1547	0	0	0	0	23	0	0	0	0	0	0	0	1	Eukaryota
ASV_1548	0	0	0	0	0	0	0	0	23	0	0	0	0.999999917	Eukaryota	Stramenopiles	Ochrophyta	Bacillariophyta	Bacillariophyta_X	Polar-centric-Mediophyceae	Chaetoceros
ASV_1549	0	0	0	0	0	0	0	0	0	0	0	0	0.999964682	Eukaryota	Rhizaria	Radiolaria	RAD-C	RAD-C_X	RAD-C_XX	RAD-C_XXX	RAD-C_XXX_sp.
ASV_1550	0	0	0	23	0	0	0	0	0	0	0	0	0.84451434	Eukaryota	Alveolata	Dinoflagellata	Dinophyceae	Gymnodiniales	Chytriodiniaceae	Dissodinium	Dissodinium_pseudolunula
ASV_1551	0	0	0	23	0	0	0	0	0	0	0	0	0.998066875	Eukaryota	Stramenopiles	Sagenista	MAST-7	MAST-7B	MAST-7B_X	MAST-7B_XX	MAST-7B_XX_sp.
ASV_1552	0	0	0	23	0	0	0	0	0	0	0	0	0.870009749	Eukaryota	Alveolata	Dinoflagellata	Dinophyceae
ASV_1553	0	0	0	23	0	0	0	0	0	0	0	0	0.990921039	Eukaryota	Alveolata	Dinoflagellata	Dinophyceae	Dinophyceae_X	Dinophyceae_XX	Dinophyceae_XXX	Dinophyceae_XXX_sp.
ASV_1554	0	0	0	23	0	0	0	0	0	0	0	0	0.816494644	Eukaryota	Alveolata	Dinoflagellata	Syndiniales	Dino-Group-II	Dino-Group-II_X	Dino-Group-II_XX	Dino-Group-II_XX_sp.
ASV_1556	12	10	0	0	0	0	0	0	0	0	0	0	0.847976154	Eukaryota	Alveolata	Dinoflagellata	Dinophyceae	Dinophyceae_X	Dinophyceae_XX	Dinophyceae_XXX	Dinophyceae_XXX_sp.
ASV_1557	5	12	2	3	0	0	0	0	0	0	0	0	0.998797613	Eukaryota	Rhizaria	Cercozoa	Chlorarachniophyceae	Chlorarachniophyceae_X	NPK2-lineage	NPK2-lineage_X	NPK2-lineage_X_sp.
ASV_1558	7	5	9	0	0	0	0	0	1	0	0	0	0.999914423	Eukaryota	Stramenopiles	Sagenista	MAST-10	MAST-10_X	MAST-10_XX	MAST-10_XXX	MAST-10_XXX_sp.
ASV_1559	0	22	0	0	0	0	0	0	0	0	0	0	0.999776913	Eukaryota	Alveolata	Ciliophora	Spirotrichea	Strombidiida	Strombidiidae_L	Strombidiidae_L_X	Strombidiidae_L_X_sp.
ASV_1560	0	22	0	0	0	0	0	0	0	0	0	0	0.99999866	Eukaryota	Alveolata	Ciliophora	Spirotrichea
ASV_1561	0	22	0	0	0	0	0	0	0	0	0	0	0.998171804	Eukaryota	Hacrobia	Haptophyta	Prymnesiophyceae	Prymnesiales	Chrysochromulinaceae	Chrysochromulina
ASV_1562	3	12	7	0	0	0	0	0	0	0	0	0	0.825654891	Eukaryota	Alveolata	Dinoflagellata
ASV_1563	0	22	0	0	0	0	0	0	0	0	0	0	0.999994965	Eukaryota	Alveolata	Dinoflagellata	Syndiniales	Dino-Group-II
ASV_1564	0	22	0	0	0	0	0	0	0	0	0	0	0.715590657	Eukaryota	Alveolata	Dinoflagellata	Syndiniales	Dino-Group-II	Dino-Group-II_X	Dino-Group-II_XX	Dino-Group-II_XX_sp.
ASV_1565	0	22	0	0	0	0	0	0	0	0	0	0	0.94614774	Eukaryota	Alveolata	Dinoflagellata	Syndiniales	Dino-Group-II
ASV_1566	0	22	0	0	0	0	0	0	0	0	0	0	0.963556662	Eukaryota	Stramenopiles	Ochrophyta	Dictyochophyceae	Dictyochophyceae_X	Rhizochromulinales	Rhizochromulinales_X	Rhizochromulinales_X_sp.
ASV_1567	0	22	0	0	0	0	0	0	0	0	0	0	0.999997648	Eukaryota	Stramenopiles	Ochrophyta	MOCH-2	MOCH-2_X	MOCH-2_XX	MOCH-2_XXX	MOCH-2_XXX_sp.
ASV_1568	0	22	0	0	0	0	0	0	0	0	0	0	0.786799764	Eukaryota	Alveolata	Dinoflagellata	Syndiniales	Dino-Group-II
ASV_1569	0	0	0	0	0	0	0	0	0	0	0	22	1	Eukaryota	Alveolata	Dinoflagellata	Dinophyceae	Peridiniales	Protoperidiniaceae	Protoperidinium	Protoperidinium_depressum
ASV_1570	0	0	0	0	0	0	0	22	0	0	0	0	0.81950526	Eukaryota	Alveolata	Dinoflagellata	Dinophyceae	Dinophyceae_X	Dinophyceae_XX	Dinophyceae_XXX	Dinophyceae_XXX_sp.
ASV_1571	0	0	0	0	2	20	0	0	0	0	0	0	1	Eukaryota
ASV_1572	0	0	0	0	5	17	0	0	0	0	0	0	0.996610551	Eukaryota	Alveolata	Dinoflagellata	Syndiniales	Dino-Group-II	Dino-Group-II-Clade-10-and-11	Dino-Group-II-Clade-10-and-11_X	Dino-Group-II-Clade-10-and-11_X_sp.
ASV_1573	0	0	0	0	0	22	0	0	0	0	0	0	0.982836802	Eukaryota	Rhizaria	Cercozoa	Filosa-Thecofilosea	Ebriida	TAGIRI1-lineage	TAGIRI1-lineage_X	TAGIRI1-lineage_X_sp.
ASV_1574	22	0	0	0	0	0	0	0	0	0	0	0	0.937462036	Eukaryota	Alveolata	Dinoflagellata	Syndiniales	Dino-Group-II	Dino-Group-II-Clade-2	Dino-Group-II-Clade-2_X	Dino-Group-II-Clade-2_X_sp.
ASV_1575	22	0	0	0	0	0	0	0	0	0	0	0	0.998364784	Eukaryota	Alveolata	Dinoflagellata	Syndiniales	Dino-Group-II
ASV_1576	14	0	0	8	0	0	0	0	0	0	0	0	0.923937791	Eukaryota	Alveolata	Dinoflagellata	Dinophyceae	Dinophyceae_X	Dinophyceae_XX	Dinophyceae_XXX	Dinophyceae_XXX_sp.
ASV_1577	0	0	22	0	0	0	0	0	0	0	0	0	0.965489417	Eukaryota	Alveolata	Dinoflagellata	Syndiniales	Dino-Group-II	Dino-Group-II-Clade-26	Dino-Group-II-Clade-26_X	Dino-Group-II-Clade-26_X_sp.
ASV_1578	0	0	22	0	0	0	0	0	0	0	0	0	0.997442085	Eukaryota	Hacrobia	Centroheliozoa	Centroheliozoa_X	Pterocystida	Pterocystida_X	Pterocystida_XX	Pterocystida_XX_sp.
ASV_1579	0	0	0	22	0	0	0	0	0	0	0	0	1	Eukaryota
ASV_1580	0	0	0	22	0	0	0	0	0	0	0	0	1	Eukaryota	Stramenopiles	Ochrophyta	Chrysophyceae	Chrysophyceae_X	Chrysophyceae_Clade-G	Chrysophyceae_Clade-G_X	Chrysophyceae_Clade-G_X_sp.
ASV_1581	0	0	0	22	0	0	0	0	0	0	0	0	0.999974245	Eukaryota	Alveolata	Dinoflagellata	Syndiniales	Dino-Group-II	Dino-Group-II-Clade-22	Dino-Group-II-Clade-22_X	Dino-Group-II-Clade-22_X_sp.
ASV_1582	0	2	14	3	0	0	1	0	0	0	1	0	0.985238017	Eukaryota	Stramenopiles	Ochrophyta	Chrysophyceae	Chrysophyceae_X	Chrysophyceae_Clade-F	Paraphysomonas	Paraphysomonas_imperforata
ASV_1583	4	10	0	0	0	0	2	0	5	0	0	0	0.994314904	Eukaryota	Rhizaria	Radiolaria	Acantharea
ASV_1584	17	4	0	0	0	0	0	0	0	0	0	0	0.999999737	Eukaryota	Stramenopiles	Ochrophyta	Bacillariophyta	Bacillariophyta_X
ASV_1585	10	11	0	0	0	0	0	0	0	0	0	0	0.796605859	Eukaryota	Hacrobia	Haptophyta	Prymnesiophyceae	Prymnesiales	Prymnesiaceae
ASV_1586	0	21	0	0	0	0	0	0	0	0	0	0	0.770959005	Eukaryota	Alveolata	Dinoflagellata	Syndiniales	Dino-Group-II	Dino-Group-II_X	Dino-Group-II_XX	Dino-Group-II_XX_sp.
ASV_1587	0	21	0	0	0	0	0	0	0	0	0	0	0.927942138	Eukaryota	Alveolata	Dinoflagellata	Syndiniales	Dino-Group-II
ASV_1588	1	6	14	0	0	0	0	0	0	0	0	0	0.993148252	Eukaryota	Alveolata	Dinoflagellata	Dinophyceae
ASV_1589	0	0	0	0	0	0	0	0	0	0	0	21	1	Eukaryota	Stramenopiles	Opalozoa	MAST-3	MAST-3I	MAST-3I_X	MAST-3I_XX	MAST-3I_XX_sp.
ASV_1590	0	0	0	0	0	0	0	0	0	0	0	21	0.999999983	Eukaryota	Alveolata	Dinoflagellata	Syndiniales	Dino-Group-II	Dino-Group-II-Clade-18	Dino-Group-II-Clade-18_X	Dino-Group-II-Clade-18_X_sp.
ASV_1591	0	0	0	0	0	0	0	21	0	0	0	0	0.711495069	Eukaryota	Alveolata	Ciliophora	Spirotrichea	Tintinnida	Ptychocylididae
ASV_1592	0	0	0	0	0	0	0	21	0	0	0	0	0.963963266	Eukaryota	Alveolata	Dinoflagellata
ASV_1593	0	0	0	0	11	10	0	0	0	0	0	0	0.854260584	Eukaryota	Opisthokonta
ASV_1594	0	0	0	0	5	16	0	0	0	0	0	0	0.959933862	Eukaryota	Alveolata	Ciliophora	Spirotrichea	Tintinnida	Dictyocystidae	Dictyocysta
ASV_1595	0	0	0	0	0	21	0	0	0	0	0	0	0.999999996	Eukaryota	Stramenopiles	Opalozoa	MAST-3	MAST-3I	MAST-3I_X	MAST-3I_XX	MAST-3I_XX_sp.
ASV_1596	21	0	0	0	0	0	0	0	0	0	0	0	0.99996029	Eukaryota	Alveolata	Dinoflagellata	Syndiniales	Dino-Group-II
ASV_1597	21	0	0	0	0	0	0	0	0	0	0	0	0.999728939	Eukaryota	Alveolata	Dinoflagellata	Syndiniales	Dino-Group-I	Dino-Group-I-Clade-5	Dino-Group-I-Clade-5_X	Dino-Group-I-Clade-5_X_sp.
ASV_1598	21	0	0	0	0	0	0	0	0	0	0	0	0.98984599	Eukaryota	Alveolata	Dinoflagellata	Dinophyceae	Dinophyceae_X	Dinophyceae_XX	Dinophyceae_XXX	Dinophyceae_XXX_sp.
ASV_1599	21	0	0	0	0	0	0	0	0	0	0	0	0.992825728	Eukaryota	Alveolata	Dinoflagellata	Syndiniales	Dino-Group-II
ASV_1600	0	0	21	0	0	0	0	0	0	0	0	0	0.999999968	Eukaryota	Alveolata	Ciliophora	Spirotrichea	Tintinnida	Eutintinnidae	Eutintinnus
ASV_1601	0	0	0	21	0	0	0	0	0	0	0	0	0.769658667	Eukaryota	Stramenopiles	Sagenista	MAST-6	MAST-6_X	MAST-6_XX	MAST-6_XXX	MAST-6_XXX_sp.
ASV_1602	0	0	0	21	0	0	0	0	0	0	0	0	0.999991816	Eukaryota	Alveolata	Dinoflagellata	Syndiniales	Dino-Group-II	Dino-Group-II-Clade-55	Dino-Group-II-Clade-55_X	Dino-Group-II-Clade-55_X_sp.
ASV_1603	0	0	0	21	0	0	0	0	0	0	0	0	0.829874839	Eukaryota	Alveolata	Dinoflagellata	Syndiniales	Dino-Group-II	Dino-Group-II-Clade-46	Dino-Group-II-Clade-46_X	Dino-Group-II-Clade-46_X_sp.
ASV_1604	0	0	0	0	0	0	0	0	4	8	2	1	0.961596681	Eukaryota	Stramenopiles	Ochrophyta	Bacillariophyta	Bacillariophyta_X	Araphid-pennate	Fragilaria	Fragilaria_sp.
ASV_1606	3	11	6	0	0	0	0	0	0	0	0	0	0.994702421	Eukaryota	Stramenopiles	Ochrophyta	Bacillariophyta	Bacillariophyta_X
ASV_1607	0	20	0	0	0	0	0	0	0	0	0	0	0.999999957	Eukaryota	Stramenopiles	Ochrophyta	MOCH-2	MOCH-2_X	MOCH-2_XX	MOCH-2_XXX	MOCH-2_XXX_sp.
ASV_1608	0	20	0	0	0	0	0	0	0	0	0	0	0.809136581	Eukaryota	Alveolata	Ciliophora	Spirotrichea	Tintinnida
ASV_1609	0	7	0	12	1	0	0	0	0	0	0	0	0.724602267	Eukaryota	Alveolata	Dinoflagellata	Syndiniales	Dino-Group-II
ASV_1610	0	20	0	0	0	0	0	0	0	0	0	0	0.97552409	Eukaryota	Alveolata	Dinoflagellata	Syndiniales	Dino-Group-I	Dino-Group-I-Clade-5	Dino-Group-I-Clade-5_X	Dino-Group-I-Clade-5_X_sp.
ASV_1611	0	20	0	0	0	0	0	0	0	0	0	0	0.837137453	Eukaryota	Alveolata	Dinoflagellata	Dinophyceae	Gymnodiniales	Chytriodiniaceae	Dissodinium	Dissodinium_pseudolunula
ASV_1612	0	20	0	0	0	0	0	0	0	0	0	0	0.735507779	Eukaryota	Alveolata	Dinoflagellata	Syndiniales	Dino-Group-II
ASV_1613	0	20	0	0	0	0	0	0	0	0	0	0	0.811269249	Eukaryota	Archaeplastida	Streptophyta
ASV_1614	0	20	0	0	0	0	0	0	0	0	0	0	1	Eukaryota
ASV_1615	0	0	0	0	0	0	0	0	0	0	0	20	0.891290209	Eukaryota	Alveolata	Dinoflagellata	Syndiniales	Dino-Group-II	Dino-Group-II-Clade-1	Dino-Group-II-Clade-1_X	Dino-Group-II-Clade-1_X_sp.
ASV_1616	0	0	0	0	0	0	0	0	0	0	0	20	1	Eukaryota
ASV_1617	0	0	0	0	0	0	4	0	5	0	0	11	0.767151785	Eukaryota	Opisthokonta	Fungi	Chytridiomycota	Chytridiomycotina	Chytridiomycetes
ASV_1618	0	0	14	0	0	0	0	0	0	0	0	6	0.995557693	Eukaryota	Stramenopiles	Ochrophyta	Bacillariophyta	Bacillariophyta_X	Polar-centric-Mediophyceae	Chaetoceros	Chaetoceros_diadema_2
ASV_1619	0	0	0	0	0	0	0	20	0	0	0	0	0.999985016	Eukaryota	Alveolata	Dinoflagellata	Dinophyceae
ASV_1620	0	0	0	0	0	0	2	4	13	1	0	0	0.756452729	Eukaryota	Opisthokonta
ASV_1621	4	0	0	0	0	16	0	0	0	0	0	0	1	Eukaryota
ASV_1622	13	0	0	0	0	7	0	0	0	0	0	0	0.980242665	Eukaryota	Alveolata	Dinoflagellata	Syndiniales	Dino-Group-II
ASV_1623	0	0	0	0	0	20	0	0	0	0	0	0	0.898665604	Eukaryota	Alveolata	Dinoflagellata	Dinophyceae	Dinophyceae_X	Dinophyceae_XX	Dinophyceae_XXX	Dinophyceae_XXX_sp.
ASV_1624	0	0	0	0	0	20	0	0	0	0	0	0	1	Eukaryota
ASV_1625	20	0	0	0	0	0	0	0	0	0	0	0	0.961442576	Eukaryota	Alveolata	Dinoflagellata	Syndiniales	Dino-Group-II
ASV_1626	0	0	7	0	13	0	0	0	0	0	0	0	0.986018824	Eukaryota	Alveolata	Dinoflagellata	Dinophyceae	Dinophyceae_X	Dinophyceae_XX	Dinophyceae_XXX	Dinophyceae_XXX_sp.
ASV_1627	0	0	0	0	0	0	0	0	20	0	0	0	0.738943219	Eukaryota	Opisthokonta	Fungi	Chytridiomycota	Chytridiomycotina	Chytridiomycetes
ASV_1628	0	0	0	0	0	0	0	0	20	0	0	0	0.788697282	Eukaryota	Hacrobia	Picozoa	Picozoa_X	Picozoa_XX	Picozoa_XXX	Picomonas	Picomonas_judraskeda
ASV_1629	0	0	20	0	0	0	0	0	0	0	0	0	0.999999406	Eukaryota	Stramenopiles	Sagenista	MAST-9	MAST-9A	MAST-9A_X	MAST-9A_XX	MAST-9A_XX_sp.
ASV_1630	0	0	20	0	0	0	0	0	0	0	0	0	0.733649875	Eukaryota	Hacrobia	Centroheliozoa	Centroheliozoa_X	Pterocystida	Pterocystidae	Raineriophrys	Raineriophrys_sp.
ASV_1631	0	0	0	20	0	0	0	0	0	0	0	0	1	Eukaryota
ASV_1632	0	0	0	20	0	0	0	0	0	0	0	0	0.999723295	Eukaryota	Rhizaria	Radiolaria	Polycystinea	Spumellarida	Spumellarida-Group-I	Astrosphaera	Astrosphaera_hexagonalis
ASV_1633	0	0	0	20	0	0	0	0	0	0	0	0	0.749286248	Eukaryota	Opisthokonta
ASV_1634	0	0	0	20	0	0	0	0	0	0	0	0	0.979993539	Eukaryota	Hacrobia	Telonemia	Telonemia_X	Telonemia_XX	Telonemia-Group-2	Telonema-Group-2	Telonema_antarcticum
ASV_1635	0	0	0	20	0	0	0	0	0	0	0	0	1	Eukaryota	Alveolata	Dinoflagellata	Dinophyceae
ASV_1636	0	0	0	20	0	0	0	0	0	0	0	0	0.963421827	Eukaryota	Alveolata	Dinoflagellata	Syndiniales	Dino-Group-II
ASV_1637	0	0	0	20	0	0	0	0	0	0	0	0	0.999813446	Eukaryota	Alveolata	Dinoflagellata	Syndiniales	Dino-Group-II	Dino-Group-II-Clade-19	Dino-Group-II-Clade-19_X	Dino-Group-II-Clade-19_X_sp.
ASV_1638	0	19	0	0	0	0	0	0	0	0	0	0	1	Eukaryota	Alveolata	Dinoflagellata	Syndiniales	Dino-Group-II	Dino-Group-II-Clade-14	Dino-Group-II-Clade-14_X	Dino-Group-II-Clade-14_X_sp.
ASV_1639	0	19	0	0	0	0	0	0	0	0	0	0	1	Eukaryota	Alveolata	Dinoflagellata	Syndiniales	Dino-Group-II	Dino-Group-II-Clade-14	Dino-Group-II-Clade-14_X	Dino-Group-II-Clade-14_X_sp.
ASV_1640	0	19	0	0	0	0	0	0	0	0	0	0	0.939938177	Eukaryota	Stramenopiles
ASV_1641	0	19	0	0	0	0	0	0	0	0	0	0	0.982829169	Eukaryota	Opisthokonta	Choanoflagellida	Choanoflagellatea	Acanthoecida	Stephanoecidae_Group_E	Stephanoecidae_Group_E_X	Stephanoecidae_Group_E_X_sp.
ASV_1642	0	19	0	0	0	0	0	0	0	0	0	0	0.999937597	Eukaryota	Hacrobia	Haptophyta	Prymnesiophyceae
ASV_1643	0	16	1	2	0	0	0	0	0	0	0	0	0.995361478	Eukaryota	Alveolata	Dinoflagellata	Syndiniales	Dino-Group-II
ASV_1644	0	19	0	0	0	0	0	0	0	0	0	0	0.846768025	Eukaryota	Alveolata	Dinoflagellata	Syndiniales	Dino-Group-I	Dino-Group-I-Clade-5	Dino-Group-I-Clade-5_X	Dino-Group-I-Clade-5_X_sp.
ASV_1645	0	3	0	0	0	1	0	0	0	0	0	15	0.999999739	Eukaryota	Alveolata	Dinoflagellata	Syndiniales	Dino-Group-II	Dino-Group-II-Clade-47	Dino-Group-II-Clade-47_X	Dino-Group-II-Clade-47_X_sp.
ASV_1646	0	0	0	0	0	0	19	0	0	0	0	0	0.999994652	Eukaryota	Alveolata	Dinoflagellata	Syndiniales	Dino-Group-II	Dino-Group-II-Clade-10-and-11	Dino-Group-II-Clade-10-and-11_X	Dino-Group-II-Clade-10-and-11_X_sp.
ASV_1647	19	0	0	0	0	0	0	0	0	0	0	0	0.721130603	Eukaryota	Alveolata	Dinoflagellata	Dinophyceae	Gonyaulacales	Pyrocystaceae	Pyrocystis
ASV_1648	19	0	0	0	0	0	0	0	0	0	0	0	0.99999993	Eukaryota	Alveolata	Dinoflagellata	Dinophyceae
ASV_1649	19	0	0	0	0	0	0	0	0	0	0	0	0.988177796	Eukaryota	Alveolata	Dinoflagellata	Dinophyceae
ASV_1650	19	0	0	0	0	0	0	0	0	0	0	0	0.771939707	Eukaryota	Alveolata	Dinoflagellata	Syndiniales	Dino-Group-II	Dino-Group-II_X	Dino-Group-II_XX	Dino-Group-II_XX_sp.
ASV_1651	12	0	0	7	0	0	0	0	0	0	0	0	0.960250025	Eukaryota	Alveolata	Dinoflagellata	Syndiniales	Dino-Group-II	Dino-Group-II_X	Dino-Group-II_XX	Dino-Group-II_XX_sp.
ASV_1652	0	0	0	0	19	0	0	0	0	0	0	0	0.999999995	Eukaryota	Alveolata	Dinoflagellata	Syndiniales	Dino-Group-II	Dino-Group-II-Clade-57	Dino-Group-II-Clade-57_X	Dino-Group-II-Clade-57_X_sp.
ASV_1653	0	0	19	0	0	0	0	0	0	0	0	0	0.953392558	Eukaryota	Alveolata	Dinoflagellata	Dinophyceae	Dinophyceae_X	Dinophyceae_XX	Dinophyceae_XXX	Dinophyceae_XXX_sp.
ASV_1654	0	0	0	19	0	0	0	0	0	0	0	0	1	Eukaryota
ASV_1655	0	0	0	19	0	0	0	0	0	0	0	0	0.999999999	Eukaryota	Opisthokonta	Mesomycetozoa	Filasterea	Ministerida	Ministeridae	Ministeria	Ministeria_vibrans
ASV_1656	0	0	0	19	0	0	0	0	0	0	0	0	0.916052805	Eukaryota	Rhizaria	Cercozoa	Filosa-Thecofilosea	Cryomonadida	Protaspa-lineage	Protaspa	Protaspa_grandis
ASV_1657	0	0	0	19	0	0	0	0	0	0	0	0	0.721671131	Eukaryota	Alveolata	Dinoflagellata	Dinophyceae	Gonyaulacales	Goniodomataceae	Alexandrium	Alexandrium_pseudogonyaulax
ASV_1658	0	0	0	19	0	0	0	0	0	0	0	0	0.979484661	Eukaryota	Hacrobia	Centroheliozoa	Centroheliozoa_X	Pterocystida	Pterocystidae	Raineriophrys
ASV_1659	0	0	0	19	0	0	0	0	0	0	0	0	0.863137318	Eukaryota	Alveolata	Dinoflagellata	Dinophyceae	Dinophyceae_X	Dinophyceae_XX	Dinophyceae_XXX	Dinophyceae_XXX_sp.
ASV_1660	0	0	0	19	0	0	0	0	0	0	0	0	0.703983441	Eukaryota	Alveolata	Dinoflagellata
ASV_1661	0	0	0	19	0	0	0	0	0	0	0	0	0.760115104	Eukaryota	Opisthokonta	Fungi	Chytridiomycota	Chytridiomycotina	Chytridiomycetes	Aphelidium	Aphelidium_sp.
ASV_1662	0	18	0	0	0	0	0	0	0	0	0	0	0.999433635	Eukaryota	Alveolata	Ciliophora	Spirotrichea	Strombidiida	Strombidiidae_J	Strombidiidae_J_X	Strombidiidae_J_X_sp.
ASV_1663	0	13	0	5	0	0	0	0	0	0	0	0	0.758987146	Eukaryota	Opisthokonta	Fungi	Chytridiomycota	Chytridiomycotina	Chytridiomycetes	Aphelidium	Aphelidium_sp.
ASV_1664	2	13	3	0	0	0	0	0	0	0	0	0	0.702161532	Eukaryota	Alveolata	Ciliophora	Spirotrichea	Strombidiida
ASV_1665	0	18	0	0	0	0	0	0	0	0	0	0	0.700481784	Eukaryota	Alveolata	Ciliophora	Spirotrichea	Tintinnida	Ptychocylididae
ASV_1666	2	12	0	4	0	0	0	0	0	0	0	0	0.731337804	Eukaryota	Opisthokonta	Fungi	Chytridiomycota	Chytridiomycotina	Chytridiomycetes	Aphelidium	Aphelidium_sp.
ASV_1667	0	18	0	0	0	0	0	0	0	0	0	0	0.79294392	Eukaryota	Opisthokonta	Fungi
ASV_1668	0	18	0	0	0	0	0	0	0	0	0	0	1	Eukaryota	Alveolata	Dinoflagellata	Dinophyceae
ASV_1669	0	18	0	0	0	0	0	0	0	0	0	0	0.995954942	Eukaryota	Alveolata	Dinoflagellata	Dinophyceae	Dinophyceae_X	Dinophyceae_XX	Dinophyceae_XXX	Dinophyceae_XXX_sp.
ASV_1670	0	5	0	6	0	0	0	0	0	0	0	7	0.741768942	Eukaryota	Alveolata	Dinoflagellata	Syndiniales	Dino-Group-II	Dino-Group-II_X	Dino-Group-II_XX	Dino-Group-II_XX_sp.
ASV_1671	0	18	0	0	0	0	0	0	0	0	0	0	0.998853613	Eukaryota	Alveolata	Dinoflagellata	Syndiniales	Dino-Group-II
ASV_1672	0	0	0	0	0	0	0	0	0	0	0	18	0.999951508	Eukaryota	Stramenopiles	Ochrophyta	Bacillariophyta	Bacillariophyta_X	Polar-centric-Mediophyceae
ASV_1673	0	0	0	0	0	0	0	18	0	0	0	0	0.961533245	Eukaryota	Alveolata	Dinoflagellata	Dinophyceae	Dinophyceae_X	Dinophyceae_XX	Dinophyceae_XXX	Dinophyceae_XXX_sp.
ASV_1674	0	0	0	0	0	0	0	13	5	0	0	0	0.999999224	Eukaryota	Alveolata	Dinoflagellata	Syndiniales	Dino-Group-II	Dino-Group-II-Clade-16	Dino-Group-II-Clade-16_X	Dino-Group-II-Clade-16_X_sp.
ASV_1675	0	0	0	16	0	0	0	2	0	0	0	0	0.999988278	Eukaryota	Alveolata	Dinoflagellata	Syndiniales	Dino-Group-II	Dino-Group-II-Clade-44	Dino-Group-II-Clade-44_X	Dino-Group-II-Clade-44_X_sp.
ASV_1676	0	0	0	0	0	18	0	0	0	0	0	0	0.935890124	Eukaryota	Alveolata	Ciliophora	Spirotrichea	Tintinnida	Undellidae
ASV_1677	18	0	0	0	0	0	0	0	0	0	0	0	0.989090405	Eukaryota	Alveolata	Dinoflagellata	Syndiniales	Dino-Group-II	Dino-Group-II_X	Dino-Group-II_XX	Dino-Group-II_XX_sp.
ASV_1678	18	0	0	0	0	0	0	0	0	0	0	0	0.780463723	Eukaryota	Stramenopiles	Ochrophyta	Bacillariophyta	Bacillariophyta_X	Bacillariophyta_XX	Bacillariophyta_XXX	Bacillariophyta_XXX_sp.
ASV_1679	18	0	0	0	0	0	0	0	0	0	0	0	0.99990224	Eukaryota	Alveolata	Dinoflagellata	Syndiniales	Dino-Group-II	Dino-Group-II-Clade-10-and-11	Dino-Group-II-Clade-10-and-11_X	Dino-Group-II-Clade-10-and-11_X_sp.
ASV_1680	18	0	0	0	0	0	0	0	0	0	0	0	0.740522547	Eukaryota	Alveolata	Dinoflagellata	Dinophyceae	Gymnodiniales
ASV_1681	18	0	0	0	0	0	0	0	0	0	0	0	0.776744384	Eukaryota	Alveolata	Dinoflagellata	Syndiniales	Dino-Group-II
ASV_1682	18	0	0	0	0	0	0	0	0	0	0	0	1	Eukaryota	Alveolata	Dinoflagellata	Syndiniales	Dino-Group-II	Dino-Group-II-Clade-14	Dino-Group-II-Clade-14_X	Dino-Group-II-Clade-14_X_sp.
ASV_1683	10	0	7	1	0	0	0	0	0	0	0	0	0.949283169	Eukaryota	Alveolata	Dinoflagellata
ASV_1684	0	0	0	0	18	0	0	0	0	0	0	0	1	Eukaryota
ASV_1685	0	0	0	0	0	0	0	0	18	0	0	0	0.999916185	Eukaryota	Archaeplastida	Chlorophyta	Mamiellophyceae	Mamiellales	Mamiellaceae	Micromonas	Micromonas_clade_B3
ASV_1686	0	0	18	0	0	0	0	0	0	0	0	0	0.927670046	Eukaryota	Opisthokonta	Choanoflagellida	Choanoflagellatea	Acanthoecida	Stephanoecidae_Group_E	Stephanoecidae_Group_E_X	Stephanoecidae_Group_E_X_sp.
ASV_1687	0	0	18	0	0	0	0	0	0	0	0	0	0.999999741	Eukaryota	Apusozoa	Apusomonadidae	Apusomonadidae_Group-2	Apusomonadidae_Group-2B	Apusomonadidae_Group-2B_X	Apusomonadidae_Group-2B_XX	Apusomonadidae_Group-2B_XX_sp.
ASV_1688	0	0	0	0	0	0	0	0	0	0	0	0	0.736020846	Eukaryota	Rhizaria	Radiolaria	Polycystinea	Spumellarida	Spumellarida_X	Spumellarida_XX	Spumellarida_XX_sp.
ASV_1689	0	0	0	18	0	0	0	0	0	0	0	0	1	Eukaryota	Rhizaria	Radiolaria	Acantharea
ASV_1691	0	0	0	18	0	0	0	0	0	0	0	0	0.999998788	Eukaryota	Alveolata	Dinoflagellata	Syndiniales	Dino-Group-II	Dino-Group-II-Clade-1	Dino-Group-II-Clade-1_X	Dino-Group-II-Clade-1_X_sp.
ASV_1692	0	0	0	18	0	0	0	0	0	0	0	0	0.979730817	Eukaryota	Alveolata	Dinoflagellata	Dinophyceae	Dinophyceae_X	Dinophyceae_XX	Dinophyceae_XXX	Dinophyceae_XXX_sp.
ASV_1693	0	0	0	18	0	0	0	0	0	0	0	0	0.978175485	Eukaryota	Alveolata	Dinoflagellata	Dinophyceae	Dinophyceae_X	Dinophyceae_XX	Dinophyceae_XXX	Dinophyceae_XXX_sp.
ASV_1694	0	0	0	18	0	0	0	0	0	0	0	0	0.813995167	Eukaryota	Alveolata	Dinoflagellata
ASV_1695	7	2	0	8	0	0	0	0	0	0	0	0	0.999993898	Eukaryota	Alveolata	Dinoflagellata	Syndiniales	Dino-Group-II	Dino-Group-II-Clade-14	Dino-Group-II-Clade-14_X	Dino-Group-II-Clade-14_X_sp.
ASV_1696	0	17	0	0	0	0	0	0	0	0	0	0	0.772213784	Eukaryota	Stramenopiles	Ochrophyta	Chrysophyceae	Chrysophyceae_X	Chrysophyceae_Clade-C	Dinobryon	Dinobryon_faculiferum
ASV_1697	0	17	0	0	0	0	0	0	0	0	0	0	0.987633064	Eukaryota	Opisthokonta	Choanoflagellida	Choanoflagellida_X	Choanoflagellida_XX	Choanoflagellida_XX_Clade-3	Choanoflagellida_XX_Clade-3_X	Choanoflagellida_XX_Clade-3_X_sp.
ASV_1698	0	17	0	0	0	0	0	0	0	0	0	0	0.999999437	Eukaryota	Stramenopiles	Ochrophyta	MOCH-2	MOCH-2_X	MOCH-2_XX	MOCH-2_XXX	MOCH-2_XXX_sp.
ASV_1699	0	17	0	0	0	0	0	0	0	0	0	0	0.903761213	Eukaryota	Alveolata	Dinoflagellata	Dinophyceae	Dinophyceae_X	Dinophyceae_XX	Dinophyceae_XXX	Dinophyceae_XXX_sp.
ASV_1700	0	17	0	0	0	0	0	0	0	0	0	0	0.937478733	Eukaryota	Alveolata	Dinoflagellata	Dinophyceae	Dinophyceae_X	Dinophyceae_XX	Dinophyceae_XXX	Dinophyceae_XXX_sp.
ASV_1701	0	5	1	10	0	1	0	0	0	0	0	0	1	Eukaryota
ASV_1702	0	0	0	0	0	0	0	0	0	0	0	17	0.980205324	Eukaryota	Alveolata	Dinoflagellata	Dinophyceae	Dinophyceae_X	Dinophyceae_XX	Dinophyceae_XXX	Dinophyceae_XXX_sp.
ASV_1703	0	0	0	0	0	0	0	0	0	0	0	17	0.979957277	Eukaryota	Rhizaria	Cercozoa	Filosa-Thecofilosea	Cryomonadida	Protaspa-lineage	Protaspa	Protaspa_grandis
ASV_1704	0	0	0	0	0	0	0	17	0	0	0	0	0.992785619	Eukaryota	Alveolata	Dinoflagellata	Dinophyceae	Dinophyceae_X	Dinophyceae_XX	Dinophyceae_XXX	Dinophyceae_XXX_sp.
ASV_1706	0	0	0	0	0	7	1	0	9	0	0	0	0.700985251	Eukaryota	Alveolata	Dinoflagellata	Syndiniales	Dino-Group-II	Dino-Group-II-Clade-5	Dino-Group-II-Clade-5_X	Dino-Group-II-Clade-5_X_sp.
ASV_1707	0	0	0	0	0	17	0	0	0	0	0	0	0.723187682	Eukaryota	Alveolata	Dinoflagellata	Dinophyceae	Gonyaulacales	Goniodomataceae	Alexandrium	Alexandrium_cohorticula
ASV_1708	0	0	0	0	0	17	0	0	0	0	0	0	0.999925252	Eukaryota	Alveolata	Dinoflagellata	Syndiniales	Dino-Group-II	Dino-Group-II-Clade-10-and-11	Dino-Group-II-Clade-10-and-11_X	Dino-Group-II-Clade-10-and-11_X_sp.
ASV_1709	0	0	0	0	0	17	0	0	0	0	0	0	0.915742519	Eukaryota	Alveolata	Dinoflagellata	Dinophyceae	Dinophyceae_X	Dinophyceae_XX	Dinophyceae_XXX	Dinophyceae_XXX_sp.
ASV_1710	17	0	0	0	0	0	0	0	0	0	0	0	1	Eukaryota
ASV_1711	17	0	0	0	0	0	0	0	0	0	0	0	0.922135811	Eukaryota	Alveolata	Dinoflagellata	Dinophyceae	Dinophyceae_X	Dinophyceae_XX	Dinophyceae_XXX	Dinophyceae_XXX_sp.
ASV_1712	17	0	0	0	0	0	0	0	0	0	0	0	0.9999148	Eukaryota	Stramenopiles	Sagenista	MAST-7	MAST-7_X	MAST-7_XX	MAST-7_XXX	MAST-7_XXX_sp.
ASV_1713	17	0	0	0	0	0	0	0	0	0	0	0	0.768624646	Eukaryota	Alveolata	Dinoflagellata	Syndiniales	Dino-Group-II	Dino-Group-II-Clade-12	Dino-Group-II-Clade-12_X	Dino-Group-II-Clade-12_X_sp.
ASV_1714	0	0	0	0	0	0	0	0	17	0	0	0	0.999999979	Eukaryota	Alveolata	Dinoflagellata	Syndiniales	Dino-Group-II	Dino-Group-II-Clade-16	Dino-Group-II-Clade-16_X	Dino-Group-II-Clade-16_X_sp.
ASV_1715	0	0	17	0	0	0	0	0	0	0	0	0	0.999999996	Eukaryota	Stramenopiles	Opalozoa	MAST-3	MAST-3I	MAST-3I_X	MAST-3I_XX	MAST-3I_XX_sp.
ASV_1716	0	0	0	17	0	0	0	0	0	0	0	0	0.911494133	Eukaryota	Stramenopiles	Sagenista	Labyrinthulomycetes	Labyrinthulales	Labyrinthulaceae	Aplanochytrium	Aplanochytrium_kerguelense
ASV_1718	0	0	0	17	0	0	0	0	0	0	0	0	0.999999995	Eukaryota	Alveolata	Dinoflagellata	Syndiniales	Dino-Group-II	Dino-Group-II-Clade-1	Dino-Group-II-Clade-1_X	Dino-Group-II-Clade-1_X_sp.
ASV_1719	0	0	0	17	0	0	0	0	0	0	0	0	0.975025557	Eukaryota	Alveolata	Dinoflagellata	Dinophyceae	Dinophyceae_X	Dinophyceae_XX	Dinophyceae_XXX	Dinophyceae_XXX_sp.
ASV_1720	0	0	0	17	0	0	0	0	0	0	0	0	0.98840277	Eukaryota	Alveolata	Dinoflagellata
ASV_1721	0	0	0	17	0	0	0	0	0	0	0	0	0.967989549	Eukaryota	Alveolata	Dinoflagellata	Dinophyceae	Dinophyceae_X	Dinophyceae_XX	Dinophyceae_XXX	Dinophyceae_XXX_sp.
ASV_1722	0	0	0	0	0	0	0	0	0	0	16	0	0.999997669	Eukaryota	Stramenopiles	Opalozoa	MAST-3	MAST-3L	MAST-3L_X	MAST-3L_XX	MAST-3L_XX_sp.
ASV_1723	0	16	0	0	0	0	0	0	0	0	0	0	1	Eukaryota	Alveolata	Dinoflagellata	Syndiniales	Dino-Group-II	Dino-Group-II-Clade-14	Dino-Group-II-Clade-14_X	Dino-Group-II-Clade-14_X_sp.
ASV_1724	4	12	0	0	0	0	0	0	0	0	0	0	0.999999994	Eukaryota	Alveolata	Dinoflagellata	Syndiniales	Dino-Group-II	Dino-Group-II-Clade-14	Dino-Group-II-Clade-14_X	Dino-Group-II-Clade-14_X_sp.
ASV_1725	6	10	0	0	0	0	0	0	0	0	0	0	0.999814313	Eukaryota	Alveolata	Ciliophora	Spirotrichea	Strombidiida	Strombidiidae_K	Strombidiidae_K_X	Strombidiidae_K_X_sp.
ASV_1726	0	16	0	0	0	0	0	0	0	0	0	0	0.757380157	Eukaryota	Alveolata	Ciliophora	Spirotrichea	Choreotrichida	Strobilidiidae_I	Pelagostrobilidium
ASV_1727	0	16	0	0	0	0	0	0	0	0	0	0	0.827473487	Eukaryota	Alveolata	Dinoflagellata	Syndiniales	Dino-Group-II	Dino-Group-II-Clade-1	Dino-Group-II-Clade-1_X	Dino-Group-II-Clade-1_X_sp.
ASV_1728	0	16	0	0	0	0	0	0	0	0	0	0	0.804562864	Eukaryota	Alveolata	Dinoflagellata	Syndiniales	Dino-Group-II
ASV_1729	0	16	0	0	0	0	0	0	0	0	0	0	0.975237823	Eukaryota	Alveolata	Dinoflagellata	Dinophyceae	Dinophyceae_X	Dinophyceae_XX	Dinophyceae_XXX	Dinophyceae_XXX_sp.
ASV_1730	0	16	0	0	0	0	0	0	0	0	0	0	0.995614763	Eukaryota	Alveolata	Dinoflagellata	Syndiniales	Dino-Group-I	Dino-Group-I-Clade-5	Dino-Group-I-Clade-5_X	Dino-Group-I-Clade-5_X_sp.
ASV_1731	0	16	0	0	0	0	0	0	0	0	0	0	0.960566123	Eukaryota	Alveolata	Dinoflagellata	Syndiniales	Dino-Group-I	Dino-Group-I-Clade-5	Dino-Group-I-Clade-5_X	Dino-Group-I-Clade-5_X_sp.
ASV_1732	0	16	0	0	0	0	0	0	0	0	0	0	0.88598874	Eukaryota	Alveolata	Dinoflagellata	Dinophyceae	Dinophyceae_X	Dinophyceae_XX	Dinophyceae_XXX	Dinophyceae_XXX_sp.
ASV_1733	0	0	0	0	0	0	0	0	0	0	0	16	0.999999623	Eukaryota	Stramenopiles	Ochrophyta	Bacillariophyta	Bacillariophyta_X	Polar-centric-Mediophyceae
ASV_1734	0	0	0	0	0	16	0	0	0	0	0	0	1	Eukaryota
ASV_1735	0	0	0	0	0	16	0	0	0	0	0	0	0.999196957	Eukaryota	Stramenopiles	Ochrophyta	Bacillariophyta	Bacillariophyta_X	Raphid-pennate
ASV_1736	0	0	0	0	0	16	0	0	0	0	0	0	0.996535741	Eukaryota	Alveolata	Dinoflagellata	Syndiniales	Dino-Group-II
ASV_1737	0	0	0	0	5	11	0	0	0	0	0	0	1	Eukaryota
ASV_1738	16	0	0	0	0	0	0	0	0	0	0	0	0.996730412	Eukaryota	Alveolata	Dinoflagellata	Syndiniales	Dino-Group-II
ASV_1739	16	0	0	0	0	0	0	0	0	0	0	0	1	Eukaryota	Stramenopiles	Opalozoa	MAST-3	MAST-3I	MAST-3I_X	MAST-3I_XX	MAST-3I_XX_sp.
ASV_1740	16	0	0	0	0	0	0	0	0	0	0	0	0.999999742	Eukaryota	Alveolata	Dinoflagellata	Syndiniales	Dino-Group-II	Dino-Group-II-Clade-1	Dino-Group-II-Clade-1_X	Dino-Group-II-Clade-1_X_sp.
ASV_1741	16	0	0	0	0	0	0	0	0	0	0	0	0.927722464	Eukaryota	Alveolata	Dinoflagellata	Syndiniales	Dino-Group-II	Dino-Group-II-Clade-3	Dino-Group-II-Clade-3_X	Dino-Group-II-Clade-3_X_sp.
ASV_1742	16	0	0	0	0	0	0	0	0	0	0	0	0.999511291	Eukaryota	Alveolata	Dinoflagellata	Syndiniales	Dino-Group-II	Dino-Group-II-Clade-38	Dino-Group-II-Clade-38_X	Dino-Group-II-Clade-38_X_sp.
ASV_1743	16	0	0	0	0	0	0	0	0	0	0	0	0.983724379	Eukaryota	Alveolata	Dinoflagellata	Dinophyceae	Dinophyceae_X	Dinophyceae_XX	Dinophyceae_XXX	Dinophyceae_XXX_sp.
ASV_1744	16	0	0	0	0	0	0	0	0	0	0	0	0.81858504	Eukaryota	Alveolata	Dinoflagellata	Syndiniales	Dino-Group-II
ASV_1745	16	0	0	0	0	0	0	0	0	0	0	0	0.752253109	Eukaryota	Alveolata	Dinoflagellata	Syndiniales	Dino-Group-II	Dino-Group-II-Clade-4
ASV_1746	5	0	0	11	0	0	0	0	0	0	0	0	0.986355676	Eukaryota	Alveolata	Dinoflagellata	Syndiniales	Dino-Group-II	Dino-Group-II-Clade-10-and-11	Dino-Group-II-Clade-10-and-11_X	Dino-Group-II-Clade-10-and-11_X_sp.
ASV_1749	0	0	16	0	0	0	0	0	0	0	0	0	1	Eukaryota	Alveolata	Dinoflagellata	Dinophyceae
ASV_1750	0	0	4	12	0	0	0	0	0	0	0	0	1	Eukaryota
ASV_1751	0	0	0	16	0	0	0	0	0	0	0	0	0.974598463	Eukaryota	Alveolata	Dinoflagellata	Dinophyceae	Gymnodiniales	Chytriodiniaceae	Dissodinium	Dissodinium_pseudolunula
ASV_1752	0	0	0	16	0	0	0	0	0	0	0	0	0.73425631	Eukaryota	Alveolata	Ciliophora	Oligohymenophorea	Apostomatia	Foettingeriidae	Synophrya	Synophrya_sp.
ASV_1753	0	0	0	16	0	0	0	0	0	0	0	0	0.999625168	Eukaryota	Stramenopiles	Ochrophyta	Bacillariophyta	Bacillariophyta_X
ASV_1754	0	0	0	16	0	0	0	0	0	0	0	0	0.864563491	Eukaryota	Hacrobia	Telonemia	Telonemia_X	Telonemia_XX	Telonemia-Group-2	Telonema-Group-2	Telonema_antarcticum
ASV_1755	0	0	0	16	0	0	0	0	0	0	0	0	0.994711049	Eukaryota	Alveolata	Dinoflagellata	Dinophyceae	Dinophyceae_X	Dinophyceae_XX	Dinophyceae_XXX	Dinophyceae_XXX_sp.
ASV_1756	0	0	0	16	0	0	0	0	0	0	0	0	0.988293642	Eukaryota	Alveolata	Dinoflagellata	Dinophyceae	Dinophyceae_X	Dinophyceae_XX	Dinophyceae_XXX	Dinophyceae_XXX_sp.
ASV_1757	0	0	0	16	0	0	0	0	0	0	0	0	0.980503184	Eukaryota	Alveolata	Dinoflagellata	Dinophyceae	Dinophyceae_X	Dinophyceae_XX	Dinophyceae_XXX	Dinophyceae_XXX_sp.
ASV_1758	0	0	0	16	0	0	0	0	0	0	0	0	0.998390597	Eukaryota	Alveolata	Dinoflagellata	Syndiniales	Dino-Group-II	Dino-Group-II-Clade-10-and-11	Dino-Group-II-Clade-10-and-11_X	Dino-Group-II-Clade-10-and-11_X_sp.
ASV_1760	0	15	0	0	0	0	0	0	0	0	0	0	0.999993898	Eukaryota	Stramenopiles	Ochrophyta	Chrysophyceae	Chrysophyceae_X	Chrysophyceae_Clade-G	Chrysophyceae_Clade-G_X	Chrysophyceae_Clade-G_X_sp.
ASV_1761	0	15	0	0	0	0	0	0	0	0	0	0	0.995179345	Eukaryota	Hacrobia	Telonemia	Telonemia_X	Telonemia_XX	Telonemia-Group-2	Telonema-Group-2	Telonema_antarcticum
ASV_1762	0	15	0	0	0	0	0	0	0	0	0	0	0.999905645	Eukaryota	Hacrobia	Telonemia	Telonemia_X	Telonemia_XX	Telonemia-Group-1	Telonema-Group-1
ASV_1763	0	15	0	0	0	0	0	0	0	0	0	0	0.919712714	Eukaryota	Stramenopiles	Ochrophyta	Dictyochophyceae	Dictyochophyceae_X	Florenciellales
ASV_1764	0	15	0	0	0	0	0	0	0	0	0	0	0.99975566	Eukaryota	Alveolata	Ciliophora	Spirotrichea
ASV_1765	0	15	0	0	0	0	0	0	0	0	0	0	0.999999986	Eukaryota	Alveolata	Dinoflagellata	Syndiniales	Dino-Group-II	Dino-Group-II-Clade-1	Dino-Group-II-Clade-1_X	Dino-Group-II-Clade-1_X_sp.
ASV_1766	0	15	0	0	0	0	0	0	0	0	0	0	0.892751042	Eukaryota	Alveolata	Dinoflagellata	Dinophyceae	Dinophyceae_X	Dinophyceae_XX	Dinophyceae_XXX	Dinophyceae_XXX_sp.
ASV_1767	0	15	0	0	0	0	0	0	0	0	0	0	0.751027924	Eukaryota	Alveolata	Dinoflagellata	Dinophyceae	Dinophyceae_X	Dinophyceae_XX	Dinophyceae_XXX	Dinophyceae_XXX_sp.
ASV_1768	8	7	0	0	0	0	0	0	0	0	0	0	0.818504856	Eukaryota	Alveolata	Dinoflagellata
ASV_1769	0	0	0	0	0	0	1	2	5	0	0	7	0.850247715	Eukaryota	Alveolata	Dinoflagellata	Syndiniales	Dino-Group-II
ASV_1770	0	0	0	0	0	0	0	15	0	0	0	0	0.973003755	Eukaryota	Rhizaria	Cercozoa	Filosa-Thecofilosea	Cryomonadida	Protaspa-lineage	Protaspa	Protaspa_grandis
ASV_1771	0	0	0	0	0	6	9	0	0	0	0	0	0.834465854	Eukaryota	Alveolata	Dinoflagellata	Syndiniales	Dino-Group-II	Dino-Group-II_X	Dino-Group-II_XX	Dino-Group-II_XX_sp.
ASV_1773	15	0	0	0	0	0	0	0	0	0	0	0	0.993295053	Eukaryota	Alveolata	Dinoflagellata	Syndiniales	Dino-Group-II	Dino-Group-II-Clade-47	Dino-Group-II-Clade-47_X	Dino-Group-II-Clade-47_X_sp.
ASV_1774	15	0	0	0	0	0	0	0	0	0	0	0	0.999999964	Eukaryota	Alveolata	Ciliophora	Spirotrichea	Strombidiida
ASV_1775	15	0	0	0	0	0	0	0	0	0	0	0	0.999999812	Eukaryota	Alveolata	Dinoflagellata	Dinophyceae
ASV_1776	15	0	0	0	0	0	0	0	0	0	0	0	0.730717854	Eukaryota	Alveolata	Dinoflagellata	Dinophyceae	Dinophyceae_X	Dinophyceae_XX	Dinophyceae_XXX	Dinophyceae_XXX_sp.
ASV_1777	15	0	0	0	0	0	0	0	0	0	0	0	0.911072268	Eukaryota	Opisthokonta
ASV_1778	15	0	0	0	0	0	0	0	0	0	0	0	0.998616288	Eukaryota	Hacrobia	Haptophyta	Prymnesiophyceae	Prymnesiales	Chrysochromulinaceae	Chrysochromulina
ASV_1779	15	0	0	0	0	0	0	0	0	0	0	0	0.859372367	Eukaryota	Alveolata	Dinoflagellata	Dinophyceae	Dinophyceae_X	Dinophyceae_XX	Dinophyceae_XXX	Dinophyceae_XXX_sp.
ASV_1780	15	0	0	0	0	0	0	0	0	0	0	0	0.982252469	Eukaryota	Alveolata	Ciliophora	Prostomatea_1	Prostomatea_1_X	Colepidae	Tiarina	Tiarina_fusa
ASV_1781	15	0	0	0	0	0	0	0	0	0	0	0	0.771178189	Eukaryota	Alveolata	Dinoflagellata	Dinophyceae	Gymnodiniales	Chytriodiniaceae	Dissodinium	Dissodinium_pseudolunula
ASV_1782	15	0	0	0	0	0	0	0	0	0	0	0	0.999997289	Eukaryota	Alveolata	Dinoflagellata	Dinophyceae
ASV_1783	0	0	0	0	15	0	0	0	0	0	0	0	1	Eukaryota
ASV_1786	0	0	0	0	0	0	0	0	15	0	0	0	0.837936932	Eukaryota	Stramenopiles	Ochrophyta	Bacillariophyta	Bacillariophyta_X	Raphid-pennate	Pseudo-nitzschia
ASV_1787	0	0	0	0	0	0	0	0	15	0	0	0	0.999998639	Eukaryota	Hacrobia	Haptophyta	Prymnesiophyceae
ASV_1788	0	0	15	0	0	0	0	0	0	0	0	0	0.75063154	Eukaryota	Opisthokonta
ASV_1789	0	0	15	0	0	0	0	0	0	0	0	0	0.85032939	Eukaryota	Stramenopiles	Ochrophyta	Bacillariophyta	Bacillariophyta_X	Raphid-pennate
ASV_1790	0	0	15	0	0	0	0	0	0	0	0	0	0.88717423	Eukaryota	Alveolata	Dinoflagellata
ASV_1791	0	0	15	0	0	0	0	0	0	0	0	0	1	Eukaryota	Alveolata	Dinoflagellata	Syndiniales	Dino-Group-II	Dino-Group-II-Clade-1	Dino-Group-II-Clade-1_X	Dino-Group-II-Clade-1_X_sp.
ASV_1792	0	0	15	0	0	0	0	0	0	0	0	0	0.933063112	Eukaryota	Alveolata	Dinoflagellata	Dinophyceae	Dinophyceae_X	Dinophyceae_XX	Dinophyceae_XXX	Dinophyceae_XXX_sp.
ASV_1793	0	0	15	0	0	0	0	0	0	0	0	0	0.99690686	Eukaryota	Alveolata	Dinoflagellata	Syndiniales	Dino-Group-II	Dino-Group-II-Clade-13	Dino-Group-II-Clade-13_X	Dino-Group-II-Clade-13_X_sp.
ASV_1794	0	0	0	15	0	0	0	0	0	0	0	0	1	Eukaryota
ASV_1795	0	0	0	15	0	0	0	0	0	0	0	0	0.709522521	Eukaryota	Alveolata	Dinoflagellata	Dinophyceae	Gymnodiniales	Chytriodiniaceae	Dissodinium	Dissodinium_pseudolunula
ASV_1796	0	0	0	15	0	0	0	0	0	0	0	0	0.999999192	Eukaryota	Alveolata	Dinoflagellata	Syndiniales	Dino-Group-II	Dino-Group-II-Clade-1	Dino-Group-II-Clade-1_X	Dino-Group-II-Clade-1_X_sp.
ASV_1797	0	0	0	15	0	0	0	0	0	0	0	0	0.741660658	Eukaryota	Alveolata	Dinoflagellata	Syndiniales	Dino-Group-II
ASV_1798	0	0	0	15	0	0	0	0	0	0	0	0	0.960071487	Eukaryota	Alveolata	Dinoflagellata	Syndiniales	Dino-Group-II	Dino-Group-II-Clade-4	Amoebophrya	Amoebophrya_ceratii
ASV_1799	0	0	0	15	0	0	0	0	0	0	0	0	0.7447976	Eukaryota	Alveolata	Dinoflagellata	Syndiniales	Dino-Group-II	Dino-Group-II_X	Dino-Group-II_XX	Dino-Group-II_XX_sp.
ASV_1800	0	14	0	0	0	0	0	0	0	0	0	0	0.7977028	Eukaryota	Alveolata	Dinoflagellata	Dinophyceae	Dinophyceae_X	Dinophyceae_XX	Dinophyceae_XXX	Dinophyceae_XXX_sp.
ASV_1801	0	14	0	0	0	0	0	0	0	0	0	0	0.882409891	Eukaryota	Stramenopiles
ASV_1802	5	9	0	0	0	0	0	0	0	0	0	0	0.812581348	Eukaryota	Alveolata	Dinoflagellata	Syndiniales	Dino-Group-II
ASV_1803	0	14	0	0	0	0	0	0	0	0	0	0	0.99849067	Eukaryota	Alveolata	Dinoflagellata	Syndiniales	Dino-Group-II	Dino-Group-II-Clade-4	Amoebophrya	Amoebophrya_ceratii
ASV_1804	0	14	0	0	0	0	0	0	0	0	0	0	0.969508966	Eukaryota	Alveolata	Dinoflagellata	Syndiniales	Dino-Group-II
ASV_1805	0	14	0	0	0	0	0	0	0	0	0	0	0.999827331	Eukaryota	Alveolata	Dinoflagellata	Syndiniales	Dino-Group-II	Dino-Group-II-Clade-10-and-11	Dino-Group-II-Clade-10-and-11_X	Dino-Group-II-Clade-10-and-11_X_sp.
ASV_1807	0	14	0	0	0	0	0	0	0	0	0	0	0.990949378	Eukaryota	Archaeplastida	Chlorophyta	Prasino-Clade-9	Prasino-Clade-9_X	Prasino-Clade-9_XX	Prasino-Clade-9_XXX	Prasino-Clade-9_XXX_sp.
ASV_1808	6	8	0	0	0	0	0	0	0	0	0	0	0.957812409	Eukaryota	Archaeplastida	Chlorophyta	Palmophyllophyceae	Prasinococcales	Prasinococcales-Clade-B	Prasinococcales-Clade-B_X	Prasinococcales-Clade-B1_X_sp.
ASV_1809	0	0	0	0	0	0	0	0	0	0	0	14	0.927379962	Eukaryota	Alveolata	Apicomplexa	Gregarinomorphea	Gregarines_GRE2	Gregarines_GRE2_X	Gregarines_GRE2_XX	Gregarines_GRE2_XX_sp.
ASV_1810	0	0	0	0	0	14	0	0	0	0	0	0	0.701470123	Eukaryota	Alveolata	Dinoflagellata	Dinophyceae	Dinophyceae_X	Dinophyceae_XX	Dinophyceae_XXX	Dinophyceae_XXX_sp.
ASV_1811	14	0	0	0	0	0	0	0	0	0	0	0	0.927693267	Eukaryota	Alveolata	Dinoflagellata
ASV_1812	14	0	0	0	0	0	0	0	0	0	0	0	0.986448892	Eukaryota	Alveolata	Ciliophora	Spirotrichea
ASV_1813	14	0	0	0	0	0	0	0	0	0	0	0	0.818616532	Eukaryota	Hacrobia	Haptophyta	Prymnesiophyceae	Coccolithales
ASV_1814	14	0	0	0	0	0	0	0	0	0	0	0	0.890582457	Eukaryota	Alveolata	Dinoflagellata	Dinophyceae	Gymnodiniales	Chytriodiniaceae	Dissodinium	Dissodinium_pseudolunula
ASV_1815	14	0	0	0	0	0	0	0	0	0	0	0	0.855938993	Eukaryota	Stramenopiles	Sagenista	MAST-6	MAST-6_X	MAST-6_XX	MAST-6_XXX	MAST-6_XXX_sp.
ASV_1816	14	0	0	0	0	0	0	0	0	0	0	0	0.996833818	Eukaryota	Alveolata	Dinoflagellata	Dinophyceae
ASV_1817	14	0	0	0	0	0	0	0	0	0	0	0	0.975316362	Eukaryota	Alveolata	Dinoflagellata	Dinophyceae	Dinophyceae_X	Dinophyceae_XX	Dinophyceae_XXX	Dinophyceae_XXX_sp.
ASV_1818	14	0	0	0	0	0	0	0	0	0	0	0	0.872450283	Eukaryota	Alveolata	Dinoflagellata	Dinophyceae	Dinophyceae_X	Dinophyceae_XX	Dinophyceae_XXX	Dinophyceae_XXX_sp.
ASV_1819	11	0	0	3	0	0	0	0	0	0	0	0	0.997087965	Eukaryota	Stramenopiles	Ochrophyta	Bacillariophyta	Bacillariophyta_X
ASV_1820	3	0	0	11	0	0	0	0	0	0	0	0	0.999999491	Eukaryota	Stramenopiles	Opalozoa	MAST-3	MAST-3K	MAST-3K_X	MAST-3K_XX	MAST-3K_XX_sp.
ASV_1821	0	0	0	0	14	0	0	0	0	0	0	0	1	Eukaryota	Stramenopiles	Opalozoa	MAST-3	MAST-3I	MAST-3I_X	MAST-3I_XX	MAST-3I_XX_sp.
ASV_1822	0	0	0	0	0	0	0	0	14	0	0	0	0.960662779	Eukaryota	Alveolata	Dinoflagellata	Dinophyceae
ASV_1824	0	0	0	0	0	0	0	0	8	0	0	0	0.877433368	Eukaryota	Alveolata	Dinoflagellata	Dinophyceae
ASV_1825	0	0	14	0	0	0	0	0	0	0	0	0	0.751892918	Eukaryota	Alveolata	Dinoflagellata	Dinophyceae	Dinophyceae_X	Dinophyceae_XX	Dinophyceae_XXX	Dinophyceae_XXX_sp.
ASV_1826	0	0	14	0	0	0	0	0	0	0	0	0	0.998448939	Eukaryota	Alveolata	Dinoflagellata	Syndiniales	Dino-Group-I	Dino-Group-I-Clade-5	Dino-Group-I-Clade-5_X	Dino-Group-I-Clade-5_X_sp.
ASV_1827	0	0	14	0	0	0	0	0	0	0	0	0	0.999646878	Eukaryota	Alveolata	Dinoflagellata	Syndiniales	Dino-Group-II	Dino-Group-II-Clade-10-and-11	Dino-Group-II-Clade-10-and-11_X	Dino-Group-II-Clade-10-and-11_X_sp.
ASV_1829	0	0	0	14	0	0	0	0	0	0	0	0	1	Eukaryota	Stramenopiles	Ochrophyta	Chrysophyceae	Chrysophyceae_X	Chrysophyceae_Clade-G	Chrysophyceae_Clade-G_X	Chrysophyceae_Clade-G_X_sp.
ASV_1830	0	0	0	14	0	0	0	0	0	0	0	0	1	Eukaryota
ASV_1831	0	0	0	14	0	0	0	0	0	0	0	0	0.999999972	Eukaryota	Stramenopiles	Ochrophyta	MOCH-2	MOCH-2_X	MOCH-2_XX	MOCH-2_XXX	MOCH-2_XXX_sp.
ASV_1832	0	0	0	14	0	0	0	0	0	0	0	0	0.974948112	Eukaryota	Hacrobia	Haptophyta	Prymnesiophyceae	Prymnesiales	Prymnesiaceae	Prymnesium
ASV_1833	0	0	0	14	0	0	0	0	0	0	0	0	0.944697092	Eukaryota	Alveolata	Dinoflagellata	Dinophyceae	Dinophyceae_X	Dinophyceae_XX	Dinophyceae_XXX	Dinophyceae_XXX_sp.
ASV_1834	0	0	0	14	0	0	0	0	0	0	0	0	0.900061981	Eukaryota	Alveolata	Dinoflagellata	Dinophyceae	Dinophyceae_X	Dinophyceae_XX	Dinophyceae_XXX	Dinophyceae_XXX_sp.
ASV_1835	0	0	0	14	0	0	0	0	0	0	0	0	0.779905487	Eukaryota	Alveolata	Dinoflagellata	Syndiniales	Dino-Group-II
ASV_1836	0	0	0	14	0	0	0	0	0	0	0	0	0.989103244	Eukaryota	Alveolata	Dinoflagellata	Syndiniales	Dino-Group-II	Dino-Group-II-Clade-10-and-11	Dino-Group-II-Clade-10-and-11_X	Dino-Group-II-Clade-10-and-11_X_sp.
ASV_1837	0	0	0	14	0	0	0	0	0	0	0	0	0.998434254	Eukaryota	Alveolata	Dinoflagellata	Syndiniales	Dino-Group-II
ASV_1838	0	0	0	14	0	0	0	0	0	0	0	0	1	Eukaryota
ASV_1839	0	13	0	0	0	0	0	0	0	0	0	0	1	Eukaryota	Alveolata	Dinoflagellata	Syndiniales	Dino-Group-II	Dino-Group-II-Clade-14	Dino-Group-II-Clade-14_X	Dino-Group-II-Clade-14_X_sp.
ASV_1840	0	13	0	0	0	0	0	0	0	0	0	0	0.862238904	Eukaryota	Hacrobia	Telonemia	Telonemia_X	Telonemia_XX	Telonemia-Group-1	Telonema-Group-1	Telonema_sp.
ASV_1841	0	13	0	0	0	0	0	0	0	0	0	0	1	Eukaryota
ASV_1842	0	13	0	0	0	0	0	0	0	0	0	0	0.990877235	Eukaryota	Alveolata	Ciliophora	Spirotrichea	Choreotrichida	Strobilidiidae_I	Strobilidiidae_I_X	Strobilidiidae_I_X_sp.
ASV_1843	0	13	0	0	0	0	0	0	0	0	0	0	0.999999875	Eukaryota	Stramenopiles	Ochrophyta	MOCH-2	MOCH-2_X	MOCH-2_XX	MOCH-2_XXX	MOCH-2_XXX_sp.
ASV_1844	0	13	0	0	0	0	0	0	0	0	0	0	0.999996056	Eukaryota	Opisthokonta	Choanoflagellida	Choanoflagellatea	Acanthoecida	Acanthoecida_X	Acanthoecida_XX	Acanthoecida_XX_sp.
ASV_1845	0	13	0	0	0	0	0	0	0	0	0	0	0.91178976	Eukaryota	Hacrobia	Haptophyta	Prymnesiophyceae	Prymnesiophyceae_X	Prymnesiophyceae_XX	Prymnesiophyceae_XXX	Prymnesiophyceae_XXX_sp.
ASV_1846	7	6	0	0	0	0	0	0	0	0	0	0	0.999997006	Eukaryota	Alveolata	Dinoflagellata	Dinophyceae
ASV_1847	0	13	0	0	0	0	0	0	0	0	0	0	0.890084539	Eukaryota	Alveolata	Dinoflagellata	Dinophyceae
ASV_1848	0	13	0	0	0	0	0	0	0	0	0	0	0.931841137	Eukaryota	Stramenopiles
ASV_1849	0	13	0	0	0	0	0	0	0	0	0	0	0.999373756	Eukaryota	Alveolata	Dinoflagellata	Syndiniales	Dino-Group-II	Dino-Group-II-Clade-1	Dino-Group-II-Clade-1_X	Dino-Group-II-Clade-1_X_sp.
ASV_1850	5	8	0	0	0	0	0	0	0	0	0	0	0.998741248	Eukaryota	Stramenopiles	Ochrophyta	Bacillariophyta	Bacillariophyta_X	Polar-centric-Mediophyceae	Chaetoceros	Chaetoceros_sporotruncatus
ASV_1851	0	0	0	0	0	0	0	0	0	0	0	13	0.923854912	Eukaryota	Stramenopiles
ASV_1852	0	0	0	0	0	0	0	0	0	0	0	13	0.716976354	Eukaryota	Stramenopiles
ASV_1853	0	0	0	0	0	0	0	0	0	0	0	13	0.998248862	Eukaryota	Archaeplastida	Chlorophyta	Trebouxiophyceae	Prasiolales	Prasiolales_X	Pseudochlorella	Pseudochlorella_sp.
ASV_1854	0	0	0	0	0	0	0	0	0	0	0	13	0.777888825	Eukaryota	Archaeplastida	Chlorophyta	Mamiellophyceae	Dolichomastigales
ASV_1855	0	0	0	0	0	0	0	0	0	0	0	13	0.993206118	Eukaryota	Alveolata	Dinoflagellata	Dinophyceae	Dinophyceae_X	Dinophyceae_XX	Dinophyceae_XXX	Dinophyceae_XXX_sp.
ASV_1856	0	0	0	0	2	0	0	3	0	0	0	7	1	Eukaryota
ASV_1857	0	0	0	0	0	0	0	13	0	0	0	0	0.999995066	Eukaryota	Rhizaria	Cercozoa	Filosa-Thecofilosea	Ebriida	TAGIRI1-lineage	TAGIRI1-lineage_X	TAGIRI1-lineage_X_sp.
ASV_1858	0	0	0	0	0	0	13	0	0	0	0	0	0.999994106	Eukaryota	Alveolata	Dinoflagellata	Dinophyceae
ASV_1859	0	0	0	0	0	13	0	0	0	0	0	0	1	Eukaryota
ASV_1860	0	0	0	0	0	13	0	0	0	0	0	0	0.999216006	Eukaryota	Rhizaria	Radiolaria	Acantharea	Arthracanthida-Symphyacanthida	Arthracanthida-Symphyacanthida_X
ASV_1861	0	0	0	0	0	13	0	0	0	0	0	0	0.814184492	Eukaryota	Alveolata	Dinoflagellata	Syndiniales	Dino-Group-II	Dino-Group-II_X	Dino-Group-II_XX	Dino-Group-II_XX_sp.
ASV_1862	0	0	0	0	0	13	0	0	0	0	0	0	0.956465798	Eukaryota	Alveolata	Dinoflagellata	Syndiniales	Dino-Group-II	Dino-Group-II_X	Dino-Group-II_XX	Dino-Group-II_XX_sp.
ASV_1863	13	0	0	0	0	0	0	0	0	0	0	0	0.828927559	Eukaryota	Alveolata	Dinoflagellata	Syndiniales	Dino-Group-II	Dino-Group-II-Clade-47	Dino-Group-II-Clade-47_X	Dino-Group-II-Clade-47_X_sp.
ASV_1864	13	0	0	0	0	0	0	0	0	0	0	0	0.999998449	Eukaryota	Alveolata	Ciliophora	Spirotrichea	Choreotrichida	Leegaardiellidae_B	Leegaardiella	Leegaardiella_sp.
ASV_1866	13	0	0	0	0	0	0	0	0	0	0	0	0.979214013	Eukaryota	Alveolata	Dinoflagellata	Dinophyceae	Dinophyceae_X	Dinophyceae_XX	Dinophyceae_XXX	Dinophyceae_XXX_sp.
ASV_1867	13	0	0	0	0	0	0	0	0	0	0	0	0.77716492	Eukaryota	Alveolata	Dinoflagellata
ASV_1868	13	0	0	0	0	0	0	0	0	0	0	0	0.956940012	Eukaryota	Alveolata	Dinoflagellata	Syndiniales	Dino-Group-II	Dino-Group-II-Clade-3	Dino-Group-II-Clade-3_X	Dino-Group-II-Clade-3_X_sp.
ASV_1869	13	0	0	0	0	0	0	0	0	0	0	0	0.856537734	Eukaryota	Alveolata	Dinoflagellata	Dinophyceae	Dinophyceae_X	Dinophyceae_XX	Dinophyceae_XXX	Dinophyceae_XXX_sp.
ASV_1871	3	0	0	10	0	0	0	0	0	0	0	0	0.719654492	Eukaryota	Archaeplastida
ASV_1872	0	0	0	0	13	0	0	0	0	0	0	0	0.84140613	Eukaryota	Alveolata	Dinoflagellata	Syndiniales	Dino-Group-II
ASV_1873	0	0	0	0	13	0	0	0	0	0	0	0	0.700259191	Eukaryota	Alveolata	Dinoflagellata	Syndiniales	Dino-Group-II
ASV_1874	0	0	13	0	0	0	0	0	0	0	0	0	0.791434584	Eukaryota	Stramenopiles	Ochrophyta	Bacillariophyta	Bacillariophyta_X	Raphid-pennate	Halamphora
ASV_1875	0	0	13	0	0	0	0	0	0	0	0	0	0.982077551	Eukaryota	Hacrobia	Centroheliozoa	Centroheliozoa_X	Pterocystida	Pterocystidae	Raineriophrys
ASV_1876	0	0	0	13	0	0	0	0	0	0	0	0	1	Eukaryota
ASV_1877	0	0	0	13	0	0	0	0	0	0	0	0	1	Eukaryota	Alveolata	Dinoflagellata	Syndiniales	Dino-Group-II	Dino-Group-II-Clade-14	Dino-Group-II-Clade-14_X	Dino-Group-II-Clade-14_X_sp.
ASV_1878	0	0	0	13	0	0	0	0	0	0	0	0	0.999699897	Eukaryota	Rhizaria	Radiolaria	Acantharea	Chaunacanthida	Chaunacanthida_X	Symphyacanthida	Symphyacanthida_sp.
ASV_1879	0	0	0	13	0	0	0	0	0	0	0	0	0.989260332	Eukaryota	Hacrobia	Haptophyta	Haptophyta_Clade_HAP4	Haptophyta_Clade_HAP4_X	Haptophyta_Clade_HAP4_XX	Haptophyta_Clade_HAP4_XXX	Haptophyta_Clade_HAP4_XXX_sp.
ASV_1880	0	0	0	13	0	0	0	0	0	0	0	0	0.999999996	Eukaryota	Alveolata	Dinoflagellata	Syndiniales	Dino-Group-II	Dino-Group-II-Clade-1	Dino-Group-II-Clade-1_X	Dino-Group-II-Clade-1_X_sp.
ASV_1881	0	0	0	13	0	0	0	0	0	0	0	0	1	Eukaryota	Alveolata	Dinoflagellata	Dinophyceae
ASV_1882	0	0	0	13	0	0	0	0	0	0	0	0	0.99999995	Eukaryota	Alveolata	Dinoflagellata	Dinophyceae
ASV_1883	0	0	0	13	0	0	0	0	0	0	0	0	1	Eukaryota	Alveolata	Dinoflagellata	Dinophyceae
ASV_1884	0	0	0	13	0	0	0	0	0	0	0	0	0.775639025	Eukaryota	Alveolata	Dinoflagellata	Dinophyceae	Dinophysiales	Dinophysiaceae	Dinophysis	Dinophysis_sp.
ASV_1885	0	0	0	13	0	0	0	0	0	0	0	0	0.831722268	Eukaryota	Alveolata	Dinoflagellata	Syndiniales	Dino-Group-II	Dino-Group-II_X	Dino-Group-II_XX	Dino-Group-II_XX_sp.
ASV_1886	0	0	0	13	0	0	0	0	0	0	0	0	0.999838391	Eukaryota	Alveolata	Dinoflagellata	Syndiniales	Dino-Group-II	Dino-Group-II-Clade-6	Dino-Group-II-Clade-6_X	Dino-Group-II-Clade-6_X_sp.
ASV_1888	0	12	0	0	0	0	0	0	0	0	0	0	0.994670235	Eukaryota	Alveolata	Dinoflagellata	Dinophyceae	Dinophyceae_X	Dinophyceae_XX	Dinophyceae_XXX	Dinophyceae_XXX_sp.
ASV_1889	0	12	0	0	0	0	0	0	0	0	0	0	0.975442226	Eukaryota	Hacrobia	Haptophyta	Prymnesiophyceae
ASV_1890	0	5	3	4	0	0	0	0	0	0	0	0	0.999642623	Eukaryota	Alveolata	Dinoflagellata	Syndiniales	Dino-Group-II	Dino-Group-II-Clade-17	Dino-Group-II-Clade-17_X	Dino-Group-II-Clade-17_X_sp.
ASV_1891	0	12	0	0	0	0	0	0	0	0	0	0	0.743801305	Eukaryota	Alveolata	Dinoflagellata	Syndiniales	Dino-Group-II	Dino-Group-II_X	Dino-Group-II_XX	Dino-Group-II_XX_sp.
ASV_1892	0	12	0	0	0	0	0	0	0	0	0	0	0.956637128	Eukaryota	Alveolata	Dinoflagellata	Dinophyceae
ASV_1893	1	5	0	6	0	0	0	0	0	0	0	0	0.98750044	Eukaryota	Alveolata	Dinoflagellata	Syndiniales	Dino-Group-II	Dino-Group-II-Clade-47	Dino-Group-II-Clade-47_X	Dino-Group-II-Clade-47_X_sp.
ASV_1894	0	6	0	6	0	0	0	0	0	0	0	0	0.992891039	Eukaryota	Alveolata	Dinoflagellata
ASV_1895	9	2	1	0	0	0	0	0	0	0	0	0	0.967118161	Eukaryota	Alveolata	Dinoflagellata
ASV_1896	0	12	0	0	0	0	0	0	0	0	0	0	0.910499209	Eukaryota	Alveolata	Dinoflagellata	Syndiniales	Dino-Group-II	Dino-Group-II_X	Dino-Group-II_XX	Dino-Group-II_XX_sp.
ASV_1897	0	12	0	0	0	0	0	0	0	0	0	0	0.803058603	Eukaryota	Alveolata	Dinoflagellata	Syndiniales	Dino-Group-II	Dino-Group-II-Clade-20	Dino-Group-II-Clade-20_X	Dino-Group-II-Clade-20_X_sp.
ASV_1898	0	12	0	0	0	0	0	0	0	0	0	0	0.774515831	Eukaryota	Alveolata	Dinoflagellata	Dinophyceae	Dinophysiales	Oxyphysiaceae	Phalachroma	Phalacroma_sp.
ASV_1899	0	12	0	0	0	0	0	0	0	0	0	0	0.952759639	Eukaryota	Stramenopiles	Ochrophyta	Dictyochophyceae	Dictyochophyceae_X	Pedinellales	Pedinella	Pedinella_sp.
ASV_1900	0	0	0	0	0	0	1	0	2	0	0	9	1	Eukaryota
ASV_1901	0	0	0	0	0	12	0	0	0	0	0	0	1	Eukaryota
ASV_1902	0	0	0	0	0	12	0	0	0	0	0	0	0.863148734	Eukaryota	Alveolata	Dinoflagellata	Dinophyceae	Gonyaulacales	Goniodomataceae	Alexandrium	Alexandrium_insuetum
ASV_1903	12	0	0	0	0	0	0	0	0	0	0	0	0.999999966	Eukaryota	Alveolata	Dinoflagellata	Syndiniales	Dino-Group-II	Dino-Group-II-Clade-1	Dino-Group-II-Clade-1_X	Dino-Group-II-Clade-1_X_sp.
ASV_1905	12	0	0	0	0	0	0	0	0	0	0	0	0.999887469	Eukaryota	Alveolata	Dinoflagellata	Syndiniales	Dino-Group-II
ASV_1906	12	0	0	0	0	0	0	0	0	0	0	0	0.892195157	Eukaryota	Alveolata	Dinoflagellata	Dinophyceae	Dinophyceae_X	Dinophyceae_XX	Dinophyceae_XXX	Dinophyceae_XXX_sp.
ASV_1907	12	0	0	0	0	0	0	0	0	0	0	0	0.934313482	Eukaryota	Rhizaria	Radiolaria	Acantharea	Acantharea_X	Acantharea_XX	Acantharea_XXX	Acantharea_XXX_sp.
ASV_1908	12	0	0	0	0	0	0	0	0	0	0	0	0.999999617	Eukaryota	Alveolata	Dinoflagellata	Syndiniales	Dino-Group-II	Dino-Group-II-Clade-1	Dino-Group-II-Clade-1_X	Dino-Group-II-Clade-1_X_sp.
ASV_1909	0	0	0	0	12	0	0	0	0	0	0	0	0.936425796	Eukaryota	Alveolata	Dinoflagellata	Dinophyceae	Gonyaulacales	Goniodomataceae	Alexandrium
ASV_1910	0	0	0	0	12	0	0	0	0	0	0	0	0.931528703	Eukaryota	Eukaryota_X	Eukaryota_XX	Eukaryota_XXX	Eukaryota_XXXX	Eukaryota_XXXXX	Eukaryota_XXXXXX	Eukaryota_XXXXXX_sp.
ASV_1911	0	0	0	0	3	0	0	0	0	0	0	0	0.757091611	Eukaryota	Stramenopiles	Ochrophyta	Bacillariophyta	Bacillariophyta_X	Polar-centric-Mediophyceae	Chaetoceros	Chaetoceros_peruvianus
ASV_1912	0	0	0	0	0	0	0	0	12	0	0	0	0.723506346	Eukaryota	Rhizaria	Cercozoa	Filosa-Imbricatea	Marimonadida	Marimonadida_X	Pseudopirsonia
ASV_1913	0	0	12	0	0	0	0	0	0	0	0	0	0.917707717	Eukaryota	Alveolata	Dinoflagellata	Dinophyceae	Dinophyceae_X	Dinophyceae_XX	Dinophyceae_XXX	Dinophyceae_XXX_sp.
ASV_1914	0	0	12	0	0	0	0	0	0	0	0	0	0.999999298	Eukaryota	Alveolata	Dinoflagellata	Syndiniales	Dino-Group-II	Dino-Group-II-Clade-1	Dino-Group-II-Clade-1_X	Dino-Group-II-Clade-1_X_sp.
ASV_1915	0	0	8	4	0	0	0	0	0	0	0	0	1	Eukaryota
ASV_1916	0	0	0	12	0	0	0	0	0	0	0	0	1	Eukaryota
ASV_1917	0	0	0	12	0	0	0	0	0	0	0	0	0.993229339	Eukaryota	Rhizaria	Radiolaria	Acantharea	Chaunacanthida	Chaunacanthida_X	Symphyacanthida	Symphyacanthida_sp.
ASV_1918	0	0	0	12	0	0	0	0	0	0	0	0	0.999727884	Eukaryota	Hacrobia	Picozoa	Picozoa_X	Picozoa_XX	Picozoa_XXX	Picomonas	Picomonas_judraskeda
ASV_1919	0	0	0	12	0	0	0	0	0	0	0	0	0.981817385	Eukaryota	Hacrobia	Centroheliozoa	Centroheliozoa_X	Pterocystida	Pterocystidae	Raineriophrys
ASV_1920	0	0	0	12	0	0	0	0	0	0	0	0	0.857026758	Eukaryota	Opisthokonta
ASV_1921	0	0	0	12	0	0	0	0	0	0	0	0	0.89218857	Eukaryota	Stramenopiles
ASV_1922	0	0	0	12	0	0	0	0	0	0	0	0	0.999999651	Eukaryota	Stramenopiles	Ochrophyta	MOCH-2	MOCH-2_X	MOCH-2_XX	MOCH-2_XXX	MOCH-2_XXX_sp.
ASV_1923	0	0	0	12	0	0	0	0	0	0	0	0	0.999999991	Eukaryota	Alveolata	Dinoflagellata	Syndiniales	Dino-Group-II	Dino-Group-II-Clade-1	Dino-Group-II-Clade-1_X	Dino-Group-II-Clade-1_X_sp.
ASV_1924	0	0	0	12	0	0	0	0	0	0	0	0	0.999999925	Eukaryota	Alveolata	Dinoflagellata	Syndiniales	Dino-Group-II	Dino-Group-II-Clade-1	Dino-Group-II-Clade-1_X	Dino-Group-II-Clade-1_X_sp.
ASV_1925	0	0	0	12	0	0	0	0	0	0	0	0	0.999999948	Eukaryota	Alveolata	Dinoflagellata	Syndiniales	Dino-Group-II	Dino-Group-II-Clade-1	Dino-Group-II-Clade-1_X	Dino-Group-II-Clade-1_X_sp.
ASV_1926	0	0	0	12	0	0	0	0	0	0	0	0	0.990755824	Eukaryota	Alveolata	Dinoflagellata	Dinophyceae	Dinophyceae_X	Dinophyceae_XX	Dinophyceae_XXX	Dinophyceae_XXX_sp.
ASV_1927	0	0	0	12	0	0	0	0	0	0	0	0	0.811374809	Eukaryota	Alveolata	Dinoflagellata	Dinophyceae	Dinophyceae_X	Dinophyceae_XX	Dinophyceae_XXX	Dinophyceae_XXX_sp.
ASV_1928	0	0	0	12	0	0	0	0	0	0	0	0	0.929663446	Eukaryota	Alveolata	Dinoflagellata	Syndiniales	Dino-Group-II	Dino-Group-II-Clade-25	Dino-Group-II-Clade-25_X	Dino-Group-II-Clade-25_X_sp.
ASV_1929	0	0	0	12	0	0	0	0	0	0	0	0	0.996166943	Eukaryota	Alveolata	Dinoflagellata	Syndiniales	Dino-Group-II	Dino-Group-II-Clade-10-and-11	Dino-Group-II-Clade-10-and-11_X	Dino-Group-II-Clade-10-and-11_X_sp.
ASV_1930	0	0	0	12	0	0	0	0	0	0	0	0	1	Eukaryota
ASV_1931	0	0	0	12	0	0	0	0	0	0	0	0	0.947389499	Eukaryota	Alveolata	Dinoflagellata	Syndiniales	Dino-Group-II
ASV_1932	0	0	0	12	0	0	0	0	0	0	0	0	1	Eukaryota
ASV_1933	0	0	0	12	0	0	0	0	0	0	0	0	0.920019968	Eukaryota	Archaeplastida	Chlorophyta	Pyramimonadales	Pyramimonadales_X	Pyramimonadales_XX
ASV_1934	0	0	0	12	0	0	0	0	0	0	0	0	1	Eukaryota
ASV_1935	0	0	0	12	0	0	0	0	0	0	0	0	1	Eukaryota
ASV_1936	0	0	1	1	0	0	0	0	3	0	3	3	0.797702858	Eukaryota	Stramenopiles	Pseudofungi	Developea	Developea_X	Developea_XX	Developayella	Developayella_sp.
ASV_1937	0	0	0	0	0	0	0	4	2	0	3	2	0.803672507	Eukaryota	Stramenopiles	Ochrophyta	Bacillariophyta	Bacillariophyta_X
ASV_1938	0	11	0	0	0	0	0	0	0	0	0	0	1	Eukaryota
ASV_1939	0	11	0	0	0	0	0	0	0	0	0	0	0.999981639	Eukaryota	Alveolata	Ciliophora	Spirotrichea	Choreotrichida	Leegaardiellidae_B	Leegaardiella	Leegaardiella_sp.
ASV_1940	0	11	0	0	0	0	0	0	0	0	0	0	0.968621592	Eukaryota	Alveolata	Ciliophora	Spirotrichea	Strombidiida
ASV_1941	2	5	0	4	0	0	0	0	0	0	0	0	0.999855643	Eukaryota	Rhizaria	Cercozoa	Filosa-Granofilosea	Cryptofilida	Novel-Gran-1	Novel-Gran-1_X	Novel-Gran-1_X_sp.
ASV_1942	0	11	0	0	0	0	0	0	0	0	0	0	0.86983126	Eukaryota	Alveolata	Dinoflagellata	Syndiniales	Dino-Group-II	Dino-Group-II_X	Dino-Group-II_XX	Dino-Group-II_XX_sp.
ASV_1943	0	11	0	0	0	0	0	0	0	0	0	0	0.999999382	Eukaryota	Alveolata	Dinoflagellata	Syndiniales	Dino-Group-II	Dino-Group-II-Clade-1	Dino-Group-II-Clade-1_X	Dino-Group-II-Clade-1_X_sp.
ASV_1944	0	11	0	0	0	0	0	0	0	0	0	0	0.911201617	Eukaryota	Alveolata	Dinoflagellata	Dinophyceae
ASV_1945	0	11	0	0	0	0	0	0	0	0	0	0	0.785082556	Eukaryota	Alveolata	Dinoflagellata	Dinophyceae
ASV_1946	0	11	0	0	0	0	0	0	0	0	0	0	0.92452814	Eukaryota	Alveolata	Dinoflagellata	Dinophyceae	Dinophyceae_X	Dinophyceae_XX	Dinophyceae_XXX	Dinophyceae_XXX_sp.
ASV_1947	0	11	0	0	0	0	0	0	0	0	0	0	0.853079993	Eukaryota	Alveolata	Dinoflagellata	Syndiniales	Dino-Group-II	Dino-Group-II_X	Dino-Group-II_XX	Dino-Group-II_XX_sp.
ASV_1948	0	11	0	0	0	0	0	0	0	0	0	0	0.999779046	Eukaryota	Alveolata	Dinoflagellata	Syndiniales	Dino-Group-II	Dino-Group-II-Clade-10-and-11	Dino-Group-II-Clade-10-and-11_X	Dino-Group-II-Clade-10-and-11_X_sp.
ASV_1949	4	7	0	0	0	0	0	0	0	0	0	0	0.999914029	Eukaryota	Stramenopiles	Sagenista	MAST-7	MAST-7D	MAST-7D_X	MAST-7D_XX	MAST-7D_XX_sp.
ASV_1950	0	0	0	0	0	0	0	0	0	0	0	11	0.999999995	Eukaryota	Alveolata	Dinoflagellata	Syndiniales	Dino-Group-II	Dino-Group-II-Clade-1	Dino-Group-II-Clade-1_X	Dino-Group-II-Clade-1_X_sp.
ASV_1951	0	0	0	0	0	0	0	0	0	0	0	11	0.991824028	Eukaryota	Alveolata	Dinoflagellata	Syndiniales	Dino-Group-II
ASV_1952	0	0	0	0	0	0	0	11	0	0	0	0	0.706383625	Eukaryota	Opisthokonta	Fungi	Chytridiomycota	Chytridiomycotina	Chytridiomycetes	Aphelidium	Aphelidium_sp.
ASV_1953	0	0	0	0	0	0	0	11	0	0	0	0	0.857265475	Eukaryota	Opisthokonta	Fungi
ASV_1954	0	0	0	0	0	0	0	11	0	0	0	0	0.998329645	Eukaryota	Alveolata	Dinoflagellata	Syndiniales	Dino-Group-I	Dino-Group-I-Clade-3	Dino-Group-I-Clade-3_X	Dino-Group-I-Clade-3_X_sp.
ASV_1955	0	0	0	0	0	0	11	0	0	0	0	0	0.999992771	Eukaryota	Rhizaria	Cercozoa	Filosa-Thecofilosea	Ebriida	TAGIRI1-lineage	TAGIRI1-lineage_X	TAGIRI1-lineage_X_sp.
ASV_1956	0	0	0	0	0	0	11	0	0	0	0	0	1	Eukaryota
ASV_1957	0	0	0	0	0	0	0	0	0	11	0	0	0.924262823	Eukaryota	Alveolata	Dinoflagellata	Dinophyceae	Dinophyceae_X	Dinophyceae_XX	Dinophyceae_XXX	Dinophyceae_XXX_sp.
ASV_1958	0	0	0	0	0	11	0	0	0	0	0	0	0.810314372	Eukaryota	Stramenopiles	Opalozoa	MAST-3
ASV_1959	0	0	0	0	0	11	0	0	0	0	0	0	0.920272808	Eukaryota	Alveolata	Dinoflagellata	Dinophyceae	Dinophyceae_X	Dinophyceae_XX	Dinophyceae_XXX	Dinophyceae_XXX_sp.
ASV_1960	11	0	0	0	0	0	0	0	0	0	0	0	0.962140608	Eukaryota	Alveolata	Dinoflagellata	Syndiniales	Dino-Group-II	Dino-Group-II-Clade-22	Dino-Group-II-Clade-22_X	Dino-Group-II-Clade-22_X_sp.
ASV_1961	11	0	0	0	0	0	0	0	0	0	0	0	0.852081324	Eukaryota	Alveolata	Ciliophora	Spirotrichea	Tintinnida
ASV_1962	11	0	0	0	0	0	0	0	0	0	0	0	0.999100828	Eukaryota	Alveolata	Ciliophora	CONThreeP	CONThreeP_X	CONThreeP_XX	Askenasia	Askenasia_sp.
ASV_1964	7	0	0	4	0	0	0	0	0	0	0	0	0.909259123	Eukaryota	Alveolata	Dinoflagellata	Syndiniales	Dino-Group-II	Dino-Group-II-Clade-3	Dino-Group-II-Clade-3_X	Dino-Group-II-Clade-3_X_sp.
ASV_1965	0	0	0	0	11	0	0	0	0	0	0	0	0.989079379	Eukaryota	Archaeplastida	Chlorophyta	Trebouxiophyceae	Prasiolales	Prasiolales_X	Pseudochlorella	Pseudochlorella_sp.
ASV_1966	0	0	0	0	0	0	0	0	11	0	0	0	0.982753766	Eukaryota	Rhizaria	Cercozoa	Filosa-Thecofilosea	Cryomonadida	Protaspa-lineage	Protaspa	Protaspa_grandis
ASV_1967	0	0	11	0	0	0	0	0	0	0	0	0	0.991453952	Eukaryota	Alveolata	Dinoflagellata	Syndiniales	Dino-Group-II	Dino-Group-II-Clade-17	Dino-Group-II-Clade-17_X	Dino-Group-II-Clade-17_X_sp.
ASV_1968	0	0	11	0	0	0	0	0	0	0	0	0	0.999996171	Eukaryota	Stramenopiles	Opalozoa	MAST-3	MAST-3J	MAST-3J_X	MAST-3J_XX	MAST-3J_XX_sp.
ASV_1969	0	0	11	0	0	0	0	0	0	0	0	0	1	Eukaryota
ASV_1970	0	0	11	0	0	0	0	0	0	0	0	0	0.96882921	Eukaryota	Alveolata	Dinoflagellata	Dinophyceae
ASV_1971	0	0	11	0	0	0	0	0	0	0	0	0	0.882766458	Eukaryota	Alveolata	Dinoflagellata	Dinophyceae	Gymnodiniales	Chytriodiniaceae	Dissodinium	Dissodinium_pseudolunula
ASV_1972	0	0	2	9	0	0	0	0	0	0	0	0	0.95172127	Eukaryota	Rhizaria	Cercozoa
ASV_1973	0	0	0	0	0	0	0	0	0	0	0	0	0.947508507	Eukaryota	Stramenopiles	Ochrophyta	Bacillariophyta	Bacillariophyta_X	Araphid-pennate	Fragilaria	Fragilaria_sp.
ASV_1974	0	0	0	11	0	0	0	0	0	0	0	0	0.941570254	Eukaryota	Hacrobia	Haptophyta	Prymnesiophyceae	Prymnesiophyceae_X	Prymnesiophyceae_XX	Prymnesiophyceae_XXX	Prymnesiophyceae_XXX_sp.
ASV_1975	0	0	0	11	0	0	0	0	0	0	0	0	0.997123396	Eukaryota	Alveolata	Dinoflagellata	Dinophyceae	Dinophyceae_X	Dinophyceae_XX	Dinophyceae_XXX	Dinophyceae_XXX_sp.
ASV_1976	0	0	0	11	0	0	0	0	0	0	0	0	0.999999987	Eukaryota	Rhizaria	Radiolaria	Acantharea	Arthracanthida-Symphyacanthida	Arthracanthida-Symphyacanthida_X
ASV_1977	0	0	0	11	0	0	0	0	0	0	0	0	0.999763309	Eukaryota	Rhizaria	Radiolaria	Acantharea	Arthracanthida-Symphyacanthida	Arthracanthida-Symphyacanthida_X	Acanthostaurus	Acanthostaurus_purpurascens
ASV_1979	0	0	0	11	0	0	0	0	0	0	0	0	0.800264557	Eukaryota	Stramenopiles	Ochrophyta	Bacillariophyta	Bacillariophyta_X	Raphid-pennate	Cymbella
ASV_1980	0	0	0	11	0	0	0	0	0	0	0	0	0.956975698	Eukaryota	Hacrobia	Haptophyta	Prymnesiophyceae	Prymnesiales	Prymnesiaceae	Prymnesium
ASV_1981	0	0	0	11	0	0	0	0	0	0	0	0	0.753760101	Eukaryota	Hacrobia	Haptophyta	Prymnesiophyceae	Prymnesiales	Chrysochromulinaceae	Chrysochromulina
ASV_1982	0	0	0	11	0	0	0	0	0	0	0	0	0.703487184	Eukaryota	Alveolata	Dinoflagellata
ASV_1983	0	0	0	11	0	0	0	0	0	0	0	0	0.992398671	Eukaryota	Alveolata	Dinoflagellata	Dinophyceae	Dinophyceae_X	Dinophyceae_XX	Dinophyceae_XXX	Dinophyceae_XXX_sp.
ASV_1984	0	0	0	11	0	0	0	0	0	0	0	0	0.83588504	Eukaryota	Alveolata	Dinoflagellata	Dinophyceae	Dinophyceae_X	Dinophyceae_XX	Dinophyceae_XXX	Dinophyceae_XXX_sp.
ASV_1985	0	0	0	11	0	0	0	0	0	0	0	0	0.993454311	Eukaryota	Alveolata	Dinoflagellata	Dinophyceae
ASV_1986	0	0	0	11	0	0	0	0	0	0	0	0	0.999999945	Eukaryota	Alveolata	Dinoflagellata	Syndiniales	Dino-Group-II	Dino-Group-II-Clade-22	Dino-Group-II-Clade-22_X	Dino-Group-II-Clade-22_X_sp.
ASV_1987	0	0	0	11	0	0	0	0	0	0	0	0	0.870796348	Eukaryota	Alveolata	Dinoflagellata	Dinophyceae
ASV_1988	0	0	0	11	0	0	0	0	0	0	0	0	0.999999526	Eukaryota	Hacrobia	Haptophyta	Haptophyta_Clade_HAP3	Haptophyta_Clade_HAP3_X	Haptophyta_Clade_HAP3_XX	Haptophyta_Clade_HAP3_XXX	Haptophyta_Clade_HAP3_XXX_sp.
ASV_1989	0	0	0	11	0	0	0	0	0	0	0	0	0.854264435	Eukaryota	Stramenopiles	Ochrophyta	Dictyochophyceae	Dictyochophyceae_X	Rhizochromulinales	Rhizochromulinales_X	Rhizochromulinales_X_sp.
ASV_1990	0	0	0	11	0	0	0	0	0	0	0	0	0.931816219	Eukaryota	Archaeplastida	Streptophyta	Charophyceae	Charophyceae_X	Charophyceae_XX	Nitella	Nitella_axillaris
ASV_1991	0	0	0	11	0	0	0	0	0	0	0	0	1	Eukaryota
ASV_1992	0	0	0	11	0	0	0	0	0	0	0	0	0.994288367	Eukaryota	Alveolata	Dinoflagellata	Dinophyceae
ASV_1993	0	0	0	11	0	0	0	0	0	0	0	0	0.792923087	Eukaryota	Alveolata	Dinoflagellata	Dinophyceae	Dinophysiales
ASV_1994	0	10	0	0	0	0	0	0	0	0	0	0	1	Eukaryota
ASV_1995	0	10	0	0	0	0	0	0	0	0	0	0	0.853022828	Eukaryota	Alveolata	Ciliophora	Spirotrichea
ASV_1996	4	6	0	0	0	0	0	0	0	0	0	0	0.999953235	Eukaryota	Alveolata	Ciliophora	Spirotrichea	Strombidiida	Strombidiidae_I	Strombidiidae_I_X	Strombidiidae_I_X_sp.
ASV_1997	0	10	0	0	0	0	0	0	0	0	0	0	0.756309054	Eukaryota	Stramenopiles	Ochrophyta
ASV_1998	2	8	0	0	0	0	0	0	0	0	0	0	0.999930423	Eukaryota	Stramenopiles	Opalozoa	MAST-3	MAST-3L	MAST-3L_X	MAST-3L_XX	MAST-3L_XX_sp.
ASV_1999	0	10	0	0	0	0	0	0	0	0	0	0	0.999998552	Eukaryota	Alveolata	Dinoflagellata	Syndiniales	Dino-Group-II	Dino-Group-II-Clade-1	Dino-Group-II-Clade-1_X	Dino-Group-II-Clade-1_X_sp.
ASV_2000	0	10	0	0	0	0	0	0	0	0	0	0	0.800999731	Eukaryota	Alveolata	Dinoflagellata	Syndiniales	Dino-Group-II	Dino-Group-II-Clade-47	Dino-Group-II-Clade-47_X	Dino-Group-II-Clade-47_X_sp.
ASV_2001	0	10	0	0	0	0	0	0	0	0	0	0	0.989052387	Eukaryota	Alveolata	Dinoflagellata	Syndiniales	Dino-Group-I	Dino-Group-I-Clade-5	Dino-Group-I-Clade-5_X	Dino-Group-I-Clade-5_X_sp.
ASV_2002	0	10	0	0	0	0	0	0	0	0	0	0	0.936866112	Eukaryota	Alveolata	Dinoflagellata	Syndiniales	Dino-Group-II	Dino-Group-II_X	Dino-Group-II_XX	Dino-Group-II_XX_sp.
ASV_2003	0	10	0	0	0	0	0	0	0	0	0	0	0.996147949	Eukaryota	Alveolata	Dinoflagellata	Syndiniales	Dino-Group-II	Dino-Group-II-Clade-10-and-11	Dino-Group-II-Clade-10-and-11_X	Dino-Group-II-Clade-10-and-11_X_sp.
ASV_2004	0	10	0	0	0	0	0	0	0	0	0	0	0.919149124	Eukaryota	Alveolata	Dinoflagellata	Dinophyceae	Dinophyceae_X	Dinophyceae_XX	Dinophyceae_XXX	Dinophyceae_XXX_sp.
ASV_2005	0	10	0	0	0	0	0	0	0	0	0	0	0.743015534	Eukaryota	Alveolata	Dinoflagellata	Syndiniales	Dino-Group-II
ASV_2006	0	10	0	0	0	0	0	0	0	0	0	0	0.994996347	Eukaryota	Alveolata	Dinoflagellata	Syndiniales	Dino-Group-II
ASV_2007	0	7	0	3	0	0	0	0	0	0	0	0	0.906140089	Eukaryota	Alveolata	Dinoflagellata	Syndiniales	Dino-Group-II	Dino-Group-II-Clade-10-and-11	Dino-Group-II-Clade-10-and-11_X	Dino-Group-II-Clade-10-and-11_X_sp.
ASV_2008	0	4	0	0	0	6	0	0	0	0	0	0	0.94706941	Eukaryota	Alveolata	Dinoflagellata	Syndiniales	Dino-Group-II	Dino-Group-II-Clade-12	Dino-Group-II-Clade-12_X	Dino-Group-II-Clade-12_X_sp.
ASV_2009	0	10	0	0	0	0	0	0	0	0	0	0	0.991975756	Eukaryota	Stramenopiles	Ochrophyta	Bacillariophyta	Bacillariophyta_X	Raphid-pennate
ASV_2010	0	10	0	0	0	0	0	0	0	0	0	0	0.916092638	Eukaryota	Archaeplastida	Chlorophyta	Trebouxiophyceae	Prasiolales	Prasiolales_X	Pseudochlorella	Pseudochlorella_sp.
ASV_2011	0	10	0	0	0	0	0	0	0	0	0	0	0.970764488	Eukaryota	Alveolata	Dinoflagellata
ASV_2012	0	7	0	3	0	0	0	0	0	0	0	0	0.999996457	Eukaryota	Alveolata	Dinoflagellata	Syndiniales	Dino-Group-II	Dino-Group-II-Clade-1	Dino-Group-II-Clade-1_X	Dino-Group-II-Clade-1_X_sp.
ASV_2013	0	10	0	0	0	0	0	0	0	0	0	0	1	Eukaryota
ASV_2014	0	0	0	0	0	0	0	0	0	0	0	10	0.829951847	Eukaryota	Rhizaria	Radiolaria	Polycystinea	Nassellaria	Plagiacanthoidea	Pseudocubus	Pseudocubus_obeliscus
ASV_2015	0	0	0	0	0	0	0	0	0	0	0	10	0.741895742	Eukaryota	Opisthokonta
ASV_2016	0	0	0	0	0	0	0	0	0	0	0	10	0.744381957	Eukaryota	Stramenopiles	Opalozoa	MAST-3	MAST-3_X	MAST-3_XX	MAST-3_XXX	MAST-3_XXX_sp.
ASV_2018	0	0	0	0	0	0	0	0	0	0	0	10	1	Eukaryota	Stramenopiles	Sagenista	Labyrinthulomycetes	Thraustochytriales	Thraustochytriaceae	Labyrinthuloides	Labyrinthuloides_haliotidis
ASV_2019	0	0	0	0	0	0	0	10	0	0	0	0	0.975381166	Eukaryota	Opisthokonta	Fungi
ASV_2020	0	0	0	0	0	0	5	2	3	0	0	0	0.994716521	Eukaryota	Rhizaria	Cercozoa	Filosa-Thecofilosea	Filosa-Thecofilosea_X	Mataza-lineage	Mataza	Mataza_hastifera
ASV_2021	0	0	0	0	0	0	10	0	0	0	0	0	1	Eukaryota
ASV_2022	0	0	0	0	0	10	0	0	0	0	0	0	0.999810182	Eukaryota	Hacrobia	Telonemia	Telonemia_X	Telonemia_XX	Telonemia-Group-2	Telonema-Group-2	Telonema_antarcticum
ASV_2023	0	0	0	0	0	10	0	0	0	0	0	0	0.881905631	Eukaryota	Stramenopiles	Opalozoa	MAST-3	MAST-3C	MAST-3C_X	MAST-3C_XX	MAST-3C_XX_sp.
ASV_2024	0	0	0	0	0	10	0	0	0	0	0	0	0.999648412	Eukaryota	Alveolata	Dinoflagellata	Dinophyceae	Dinophyceae_X	Dinophyceae_XX	Dinophyceae_XXX	Dinophyceae_XXX_sp.
ASV_2025	10	0	0	0	0	0	0	0	0	0	0	0	0.99814514	Eukaryota	Alveolata	Dinoflagellata	Syndiniales	Dino-Group-II	Dino-Group-II-Clade-10-and-11	Dino-Group-II-Clade-10-and-11_X	Dino-Group-II-Clade-10-and-11_X_sp.
ASV_2026	10	0	0	0	0	0	0	0	0	0	0	0	0.999999763	Eukaryota	Alveolata	Dinoflagellata	Syndiniales	Dino-Group-II	Dino-Group-II-Clade-1	Dino-Group-II-Clade-1_X	Dino-Group-II-Clade-1_X_sp.
ASV_2027	10	0	0	0	0	0	0	0	0	0	0	0	0.986242925	Eukaryota	Alveolata	Dinoflagellata	Dinophyceae	Dinophyceae_X	Dinophyceae_XX	Dinophyceae_XXX	Dinophyceae_XXX_sp.
ASV_2029	10	0	0	0	0	0	0	0	0	0	0	0	0.999999999	Eukaryota	Alveolata	Dinoflagellata	Syndiniales	Dino-Group-II	Dino-Group-II-Clade-1	Dino-Group-II-Clade-1_X	Dino-Group-II-Clade-1_X_sp.
ASV_2030	10	0	0	0	0	0	0	0	0	0	0	0	0.999964911	Eukaryota	Stramenopiles	Pseudofungi	MAST-2	MAST-2B	MAST-2B_X	MAST-2B_XX	MAST-2B_XX_sp.
ASV_2031	6	0	0	4	0	0	0	0	0	0	0	0	0.992742958	Eukaryota	Alveolata	Dinoflagellata	Dinophyceae
ASV_2032	0	0	0	0	10	0	0	0	0	0	0	0	0.751636526	Eukaryota	Alveolata	Dinoflagellata
ASV_2033	0	0	0	0	10	0	0	0	0	0	0	0	0.774252833	Eukaryota	Alveolata	Dinoflagellata	Syndiniales	Dino-Group-II	Dino-Group-II-Clade-46	Dino-Group-II-Clade-46_X	Dino-Group-II-Clade-46_X_sp.
ASV_2034	0	0	0	0	10	0	0	0	0	0	0	0	1	Eukaryota
ASV_2035	0	0	0	0	0	0	0	0	10	0	0	0	0.787016414	Eukaryota	Opisthokonta	Fungi
ASV_2036	0	0	0	0	0	0	0	0	10	0	0	0	0.740767583	Eukaryota	Stramenopiles	Ochrophyta	Bacillariophyta	Bacillariophyta_X	Raphid-pennate	Halamphora
ASV_2038	0	0	10	0	0	0	0	0	0	0	0	0	0.957527922	Eukaryota	Opisthokonta	Fungi	Chytridiomycota	Chytridiomycotina	Chytridiomycetes	Aphelidium	Aphelidium_sp.
ASV_2039	0	0	10	0	0	0	0	0	0	0	0	0	0.978340046	Eukaryota	Stramenopiles	Ochrophyta	Dictyochophyceae	Dictyochophyceae_X
ASV_2040	0	0	10	0	0	0	0	0	0	0	0	0	0.952209474	Eukaryota	Alveolata	Dinoflagellata	Syndiniales	Dino-Group-IV	Dino-Group-IV-Hematodinium-Group	Hematodinium	Hematodinium_sp.
ASV_2041	0	0	10	0	0	0	0	0	0	0	0	0	0.839386943	Eukaryota	Alveolata	Dinoflagellata	Dinophyceae	Gymnodiniales	Chytriodiniaceae	Dissodinium	Dissodinium_pseudolunula
ASV_2042	0	0	10	0	0	0	0	0	0	0	0	0	1	Eukaryota	Alveolata	Dinoflagellata	Syndiniales	Dino-Group-II	Dino-Group-II-Clade-16	Dino-Group-II-Clade-16_X	Dino-Group-II-Clade-16_X_sp.
ASV_2043	0	0	10	0	0	0	0	0	0	0	0	0	0.968823839	Eukaryota	Alveolata	Dinoflagellata	Dinophyceae	Dinophyceae_X	Dinophyceae_XX	Dinophyceae_XXX	Dinophyceae_XXX_sp.
ASV_2044	0	0	5	5	0	0	0	0	0	0	0	0	0.997930107	Eukaryota	Alveolata	Dinoflagellata	Dinophyceae	Dinophyceae_X	Dinophyceae_XX	Dinophyceae_XXX	Dinophyceae_XXX_sp.
ASV_2046	0	0	0	10	0	0	0	0	0	0	0	0	0.99997858	Eukaryota	Hacrobia	Haptophyta	Haptophyta_Clade_HAP4	Haptophyta_Clade_HAP4_X	Haptophyta_Clade_HAP4_XX	Haptophyta_Clade_HAP4_XXX	Haptophyta_Clade_HAP4_XXX_sp.
ASV_2047	0	0	0	10	0	0	0	0	0	0	0	0	0.906699413	Eukaryota	Opisthokonta	Fungi
ASV_2048	0	0	0	10	0	0	0	0	0	0	0	0	0.999999086	Eukaryota	Stramenopiles	Ochrophyta	MOCH-2	MOCH-2_X	MOCH-2_XX	MOCH-2_XXX	MOCH-2_XXX_sp.
ASV_2049	0	0	0	10	0	0	0	0	0	0	0	0	0.99998323	Eukaryota	Stramenopiles	Sagenista	MAST-8	MAST-8B	MAST-8B_X	MAST-8B_XX	MAST-8B_XX_sp.
ASV_2050	0	0	0	10	0	0	0	0	0	0	0	0	0.999999986	Eukaryota	Stramenopiles	Opalozoa	MAST-3	MAST-3I	MAST-3I_X	MAST-3I_XX	MAST-3I_XX_sp.
ASV_2051	0	0	0	10	0	0	0	0	0	0	0	0	0.991531612	Eukaryota	Alveolata	Ciliophora	Spirotrichea
ASV_2052	0	0	0	10	0	0	0	0	0	0	0	0	0.737596231	Eukaryota	Alveolata	Dinoflagellata	Dinophyceae	Gonyaulacales	Goniodomataceae	Alexandrium	Alexandrium_cohorticula
ASV_2053	0	0	0	10	0	0	0	0	0	0	0	0	0.999994229	Eukaryota	Alveolata	Dinoflagellata	Syndiniales	Dino-Group-II	Dino-Group-II-Clade-16	Dino-Group-II-Clade-16_X	Dino-Group-II-Clade-16_X_sp.
ASV_2054	0	0	0	10	0	0	0	0	0	0	0	0	0.997430093	Eukaryota	Alveolata	Dinoflagellata	Syndiniales	Dino-Group-II	Dino-Group-II-Clade-38	Dino-Group-II-Clade-38_X	Dino-Group-II-Clade-38_X_sp.
ASV_2055	0	0	0	10	0	0	0	0	0	0	0	0	0.970770078	Eukaryota	Alveolata	Dinoflagellata	Syndiniales	Dino-Group-II	Dino-Group-II-Clade-6	Dino-Group-II-Clade-6_X	Dino-Group-II-Clade-6_X_sp.
ASV_2056	0	0	0	0	0	0	0	0	0	0	9	0	0.999486671	Eukaryota	Archaeplastida	Chlorophyta	Mamiellophyceae	Dolichomastigales	Dolichomastigaceae	Dolichomastigaceae-B	Dolichomastigaceae-B_sp.
ASV_2057	0	9	0	0	0	0	0	0	0	0	0	0	0.998838011	Eukaryota	Hacrobia	Picozoa	Picozoa_X	Picozoa_XX	Picozoa_XXX	Picomonas	Picomonas_judraskeda
ASV_2058	0	9	0	0	0	0	0	0	0	0	0	0	0.999998009	Eukaryota	Alveolata	Ciliophora	Spirotrichea	Choreotrichida	Leegaardiellidae_B	Leegaardiella	Leegaardiella_sp.
ASV_2059	0	9	0	0	0	0	0	0	0	0	0	0	0.992310208	Eukaryota	Stramenopiles	Ochrophyta	Bacillariophyta	Bacillariophyta_X	Polar-centric-Mediophyceae	Chaetoceros
ASV_2060	0	9	0	0	0	0	0	0	0	0	0	0	0.992969516	Eukaryota	Alveolata	Dinoflagellata	Dinophyceae
ASV_2061	0	9	0	0	0	0	0	0	0	0	0	0	0.939759121	Eukaryota	Alveolata	Dinoflagellata
ASV_2062	0	9	0	0	0	0	0	0	0	0	0	0	0.927450383	Eukaryota	Stramenopiles
ASV_2063	2	4	3	0	0	0	0	0	0	0	0	0	0.992738251	Eukaryota	Archaeplastida	Chlorophyta	Mamiellophyceae
ASV_2064	0	9	0	0	0	0	0	0	0	0	0	0	0.997882569	Eukaryota	Archaeplastida
ASV_2065	0	9	0	0	0	0	0	0	0	0	0	0	0.732910361	Eukaryota	Opisthokonta
ASV_2066	0	0	0	0	0	0	0	0	0	0	0	9	1	Eukaryota
ASV_2068	0	0	0	0	0	0	0	0	0	0	0	9	0.999971164	Eukaryota	Alveolata	Dinoflagellata	Syndiniales	Dino-Group-II	Dino-Group-II-Clade-1	Dino-Group-II-Clade-1_X	Dino-Group-II-Clade-1_X_sp.
ASV_2069	0	0	0	0	0	0	0	0	0	0	0	9	0.999960151	Eukaryota	Stramenopiles	Ochrophyta	Bacillariophyta	Bacillariophyta_X	Polar-centric-Mediophyceae
ASV_2070	0	0	0	0	0	0	0	0	0	0	0	9	0.864257778	Eukaryota	Alveolata	Dinoflagellata	Syndiniales	Dino-Group-I	Dino-Group-I-Clade-8	Dino-Group-I-Clade-8_X	Dino-Group-I-Clade-8_X_sp.
ASV_2071	0	0	0	0	0	0	0	0	0	0	0	9	0.769376503	Eukaryota	Alveolata	Ciliophora	Spirotrichea	Strombidiida	Strombidiidae
ASV_2072	0	0	0	0	0	0	2	3	4	0	0	0	0.746093863	Eukaryota	Opisthokonta
ASV_2073	0	0	0	0	0	0	9	0	0	0	0	0	0.984050805	Eukaryota	Stramenopiles	Ochrophyta	Bacillariophyta	Bacillariophyta_X	Radial-centric-basal-Coscinodiscophyceae	Actinocyclus	Actinocyclus_curvatulus
ASV_2074	0	0	0	0	0	9	0	0	0	0	0	0	0.99168571	Eukaryota	Alveolata	Dinoflagellata	Dinophyceae	Dinophyceae_X	Dinophyceae_XX	Dinophyceae_XXX	Dinophyceae_XXX_sp.
ASV_2075	0	0	0	0	0	9	0	0	0	0	0	0	0.737615405	Eukaryota	Stramenopiles	Ochrophyta	Bacillariophyta	Bacillariophyta_X	Polar-centric-Mediophyceae	Chaetoceros	Chaetoceros_mitra
ASV_2076	0	0	0	0	0	9	0	0	0	0	0	0	0.979017104	Eukaryota	Rhizaria	Radiolaria	Polycystinea	Nassellaria	Plagiacanthoidea	Pseudocubus	Pseudocubus_obeliscus
ASV_2077	9	0	0	0	0	0	0	0	0	0	0	0	0.996312306	Eukaryota	Rhizaria	Radiolaria	Acantharea	Acantharea-Group-II	Acantharea-Group-II_X	Acantharea-Group-II_XX	Acantharea-Group-II_XX_sp.
ASV_2078	9	0	0	0	0	0	0	0	0	0	0	0	0.995418149	Eukaryota	Hacrobia	Haptophyta	Prymnesiophyceae	Prymnesiales	Chrysochromulinaceae	Chrysochromulina
ASV_2079	9	0	0	0	0	0	0	0	0	0	0	0	0.999995564	Eukaryota	Alveolata	Dinoflagellata	Syndiniales	Dino-Group-II	Dino-Group-II-Clade-1	Dino-Group-II-Clade-1_X	Dino-Group-II-Clade-1_X_sp.
ASV_2080	9	0	0	0	0	0	0	0	0	0	0	0	0.996484098	Eukaryota	Alveolata	Dinoflagellata	Syndiniales	Dino-Group-II	Dino-Group-II-Clade-3	Dino-Group-II-Clade-3_X	Dino-Group-II-Clade-3_X_sp.
ASV_2081	9	0	0	0	0	0	0	0	0	0	0	0	1	Eukaryota	Alveolata	Dinoflagellata	Dinophyceae
ASV_2082	9	0	0	0	0	0	0	0	0	0	0	0	0.999998905	Eukaryota	Alveolata	Dinoflagellata	Dinophyceae
ASV_2083	9	0	0	0	0	0	0	0	0	0	0	0	0.891145892	Eukaryota	Alveolata	Ciliophora	Phyllopharyngea	Cyrtophoria_1	Pithitidae	Pithites	Pithites_vorax
ASV_2084	9	0	0	0	0	0	0	0	0	0	0	0	0.999999838	Eukaryota	Alveolata	Dinoflagellata	Syndiniales	Dino-Group-II	Dino-Group-II-Clade-1	Dino-Group-II-Clade-1_X	Dino-Group-II-Clade-1_X_sp.
ASV_2085	9	0	0	0	0	0	0	0	0	0	0	0	0.893753417	Eukaryota	Alveolata	Dinoflagellata
ASV_2087	9	0	0	0	0	0	0	0	0	0	0	0	0.823363721	Eukaryota	Opisthokonta
ASV_2088	9	0	0	0	0	0	0	0	0	0	0	0	0.722111614	Eukaryota	Alveolata	Dinoflagellata	Dinophyceae
ASV_2089	9	0	0	0	0	0	0	0	0	0	0	0	0.999889798	Eukaryota	Alveolata	Dinoflagellata	Dinophyceae
ASV_2090	5	0	0	2	2	0	0	0	0	0	0	0	0.999844132	Eukaryota	Alveolata	Dinoflagellata	Syndiniales	Dino-Group-II	Dino-Group-II-Clade-1	Dino-Group-II-Clade-1_X	Dino-Group-II-Clade-1_X_sp.
ASV_2091	0	0	0	0	9	0	0	0	0	0	0	0	0.95652149	Eukaryota	Alveolata	Dinoflagellata	Syndiniales	Dino-Group-II	Dino-Group-II-Clade-3	Dino-Group-II-Clade-3_X	Dino-Group-II-Clade-3_X_sp.
ASV_2092	0	0	0	0	9	0	0	0	0	0	0	0	0.99999997	Eukaryota	Alveolata	Dinoflagellata	Syndiniales	Dino-Group-II	Dino-Group-II-Clade-28	Dino-Group-II-Clade-28_X	Dino-Group-II-Clade-28_X_sp.
ASV_2093	0	0	0	0	0	0	0	0	9	0	0	0	0.911126206	Eukaryota	Stramenopiles	Opalozoa	MAST-3	MAST-3_X	MAST-3_XX	MAST-3_XXX	MAST-3_XXX_sp.
ASV_2094	0	0	0	0	0	0	0	0	9	0	0	0	0.703682086	Eukaryota	Archaeplastida	Chlorophyta
ASV_2095	0	0	9	0	0	0	0	0	0	0	0	0	0.969813295	Eukaryota	Alveolata	Dinoflagellata	Syndiniales	Dino-Group-I	Dino-Group-I-Clade-5	Dino-Group-I-Clade-5_X	Dino-Group-I-Clade-5_X_sp.
[truncated: 502 more rows]
