# Supplementary material for: Hydrographic fronts shape productivity, nitrogen fixation, and microbial community composition in the South Indian Ocean and the Southern Ocean
Source: Copernicus journal article supplement (doi:10.5194/bg-2021-52), 2021-03-15
Supplement: Supplementary file 1 [file bg-2021-52-supplement.zip › Supplementary/Table S6.docx]

**Table S6:** **SIMPER analysis of the eukaryotic (18S) and prokaryotic (16S) sequence count as relative contribution to the dissimilarity observed between provinces.**

| **18S** | | | | |
| --- | --- | --- | --- | --- |
| **Provinces** | **Rank** | **#ASV** | **Contribution (%)** | **Taxonomy** |
| SO-ISSG | 1 | ASV_2 | 2.10 | Eukaryota;Alveolata; Dinoflagellata; Dinophyceae; Dinophyceae_X; Dinophyceae_XX; Dinophyceae_XXX; Dinophyceae_XXX_sp. |
| 2 | ASV_10 | 2.08 | Eukaryota; Hacrobia; Haptophyta; Prymnesiophyceae; Phaeocystales; Phaeocystaceae; Phaeocystis; Phaeocystis_rex |
| 3 | ASV_25 | 2.04 | Eukaryota; Stramenopiles; Ochrophyta; Bacillariophyta; Bacillariophyta_X; Radial-centric-basal-Coscinodiscophyceae; Actinocyclus; Actinocyclus_curvatulus |
| 4 | ASV_31 | 1.93 | Eukaryota; Stramenopiles; Ochrophyta; Bacillariophyta; Bacillariophyta_X; Raphid-pennate; Fragilariopsis |
| 5 | ASV_33 | 1.86 | Eukaryota; Stramenopiles; Ochrophyta; Bacillariophyta; Bacillariophyta_X; Polar-centric-Mediophyceae; Chaetoceros |
| 6 | ASV_134 | 1.85 | Eukaryota; Alveolata; Dinoflagellata; Syndiniales ; Dino-Group-I; Dino-Group-I-Clade-1; Dino-Group-I-Clade-1_X; Dino-Group-I-Clade-1_X_sp. |
| 7 | ASV_18 | 1.85 | Eukaryota; Stramenopiles; Ochrophyta; Bacillariophyta; Bacillariophyta_X; Raphid-pennate. |
| 8 | ASV_67 | 1.83 | Eukaryota; Stramenopiles; Ochrophyta; Bacillariophyta; Bacillariophyta_X; Raphid-pennate; Pseudo-nitzschia; Pseudo-nitzschia_cf_cuspidata |
| 9 | ASV_78 | 1.81 | Unknown Eukaryotes |
| 10 | ASV_26 | 1.78 | Eukaryota; Hacrobia; Haptophyta; Prymnesiophyceae; Phaeocystales; Phaeocystaceae; Phaeocystis; Phaeocystis_rex |
| SO-SSTC | 1 | ASV_53 | 2.56 | Eukaryota; Alveolata; Dinoflagellata; Syndiniales; Dino-Group-I; Dino-Group-I-Clade-1; Dino-Group-I-Clade-1_X; Dino-Group-I-Clade-1_X_sp. |
| 2 | ASV_48 | 2.52 | Eukaryota; Alveolata; Dinoflagellata; Dinophyceae; Gonyaulacales; Gonyaulacaceae; Gonyaulax |
| 3 | ASV_31 | 2.49 | Eukaryota; Stramenopiles; Ochrophyta; Bacillariophyta; Bacillariophyta_X; Raphid-pennate; Fragilariopsis |
| 4 | ASV_11 | 2.47 | Eukaryota; Alveolata; Dinoflagellata; Syndiniales; Dino-Group-I; Dino-Group-I-Clade-1; Dino-Group-I-Clade-1_X; Dino-Group-I-Clade-1_X_sp |
| 5 | ASV_22 | 2.38 | Eukaryota; Alveolata; Dinoflagellata; Dinophyceae; Dinophyceae_X; Dinophyceae_XX; Dinophyceae_XXX; Dinophyceae_XXX_sp. |
| 6 | ASV_50 | 2.35 | Eukaryota; Alveolata; Dinoflagellata; Dinophyceae; Dinophyceae_X; Dinophyceae_XX; Dinophyceae_XXX; Dinophyceae_XXX_sp. |
| 7 | ASV_51 | 2.31 | Eukaryota; Alveolata; Dinoflagellata; Dinophyceae; Dinophyceae_X; Dinophyceae_XX; Dinophyceae_XXX; Dinophyceae_XXX_sp. |
| 8 | ASV_56 | 2.31 | Eukaryota; Alveolata; Dinoflagellata; Dinophyceae; Dinophyceae_X; Dinophyceae_XX; Dinophyceae_XXX; Dinophyceae_XXX_sp. |
| 9 | ASV_25 | 2.30 | Eukaryota; Stramenopiles; Ochrophyta; Bacillariophyta; Bacillariophyta_X; Radial-centric-basal-Coscinodiscophyceae; Actinocyclus; Actinocyclus_curvatulus |
| 10 | ASV_94 | 2.22 | Eukaryota; Archaeplastida; Chlorophyta; Chloropicophyceae; Chloropicales; Chloropicaceae; Chloroparvula; Chloroparvula_pacifica |
| SSTC-ISSG | 1 | ASV_94 | 1.63 | Eukaryota; Archaeplastida; Chlorophyta; Chloropicophyceae; Chloropicales; Chloropicaceae; Chloroparvula; Chloroparvula_pacifica |
| 2 | ASV_170 | 1.62 | Eukaryota; Alveolata; Dinoflagellata; Dinophyceae; Dinophyceae_X; Dinophyceae_XX; Dinophyceae_XXX; Dinophyceae_XXX_sp. |
| 3 | ASV_176 | 1.48 | Unknown Eukaryotes |
| 4 | ASV_375 | 1.48 | Eukaryota; Alveolata; Dinoflagellata; Dinophyceae; Gonyaulacales; Pyrophacaceae; Fragilidium |
| 5 | ASV_162 | 1.47 | Eukaryota; Alveolata; Dinoflagellata; Dinophyceae; Dinophyceae_X; Dinophyceae_XX; Dinophyceae_XXX; Dinophyceae_XXX_sp. |
| 6 | ASV_23 | 1.44 | Eukaryota; Archaeplastida; Chlorophyta; Chloropicophyceae; Chloropicales; Chloropicaceae; Chloroparvula; Chloroparvula_pacifica |
| 7 | ASV_505 | 1.39 | Eukaryota; Alveolata; Dinoflagellata; Dinophyceae; Dinophyceae_X; Dinophyceae_XX; Dinophyceae_XXX; Dinophyceae_XXX_sp. |
| 8 | ASV_5 | 1.33 | Eukaryota; Archaeplastida; Chlorophyta; Palmophyllophyceae; Prasinococcales; Prasinococcales-Clade-B; Prasinoderma; Prasinoderma_singularis |
| 9 | ASV_258 | 1.33 | Eukaryota; Alveolata; Dinoflagellata; Syndiniales; Dino-Group-II; Dino-Group-II-Clade-10-and-11; Dino-Group-II-Clade-10-and-11_X Dino-Group-II-Clade-10-and-11_X_sp. |
| 10 | ASV_228 | 1.30 | Eukaryota; Alveolata; Dinoflagellata; Dinophyceae |
| **16S** | | | | |
| ISSG-SO | 1 | ASV_9 | 2.06 | Bacteria; Bacteroidetes; Bacteroidia; Flavobacteriales; Flavobacteriaceae; Aquibacter |
| 2 | ASV_15 | 2.02 | Bacteria; Bacteroidetes; Bacteroidia; Flavobacteriales; Flavobacteriaceae; NS5 marine group |
| 3 | ASV_11 | 1.97 | Bacteria; Proteobacteria; Alphaproteobacteria; Rhodobacterales; Rhodobacteraceae; Planktomarina |
| 4 | ASV_26 | 1.89 | Bacteria; Proteobacteria; Alphaproteobacteria; Rhodobacterales; Rhodobacteraceae; Planktomarina |
| 5 | ASV_1 | 1.87 | Bacteria; Bacteroidetes; Bacteroidia; Flavobacteriales; Flavobacteriaceae; Ulvibacter |
| 6 | ASV_23 | 1.87 | Bacteria; Bacteroidetes; Bacteroidia; Flavobacteriales; Flavobacteriaceae; NS4 marine group |
| 7 | ASV_35 | 1.85 | Bacteria; Bacteroidetes; Bacteroidia; Flavobacteriales; Flavobacteriaceae; NS4 marine group |
| 8 | ASV_7 | 1.85 | Bacteria; Bacteroidetes; Bacteroidia; Flavobacteriales; Flavobacteriaceae; NS2b marine group |
| 9 | ASV_18 | 1.83 | Bacteria; Proteobacteria; Alphaproteobacteria; Rhodobacterales; Rhodobacteraceae; Planktomarina |
| 10 | ASV_16 | 1.73 | Bacteria; Proteobacteria; Gammaproteobacteria; Cellvibrionales; Porticoccaceae; SAR92 clade |
| SSTC-SO | 1 | ASV_12 | 2.56 | Bacteria; Proteobacteria; Gammaproteobacteria; Thiomicrospirales; Thioglobaceae; SUP05 cluster |
| 2 | ASV_26 | 2.55 | Bacteria; Proteobacteria; Alphaproteobacteria; Rhodobacterales; Rhodobacteraceae; Planktomarina |
| 3 | ASV_35 | 2.51 | Bacteria; Bacteroidetes; Bacteroidia; Flavobacteriale; Flavobacteriaceae; NS4 marine group |
| 4 | ASV_6 | 2.32 | Bacteria; Cyanobacteria; Oxyphotobacteria; Synechococcales; Cyanobiaceae; Synechococcus CC9902 |
| 5 | ASV_31 | 2.23 | Bacteria; Bacteroidetes; Bacteroidia; Flavobacteriale; NS9 marine group |
| 6 | ASV_16 | 2.21 | Bacteria; Proteobacteria; Gammaproteobacteria; Cellvibrionales; Porticoccaceae; SAR92 clade |
| 7 | ASV_65 | 2.21 | Bacteria; Proteobacteria; Gammaproteobacteria; Oceanospirillales; Nitrincolaceae |
| 8 | ASV_39 | 2.17 | Bacteria; Proteobacteria; Alphaproteobacteria; Rhodobacterales; Rhodobacteraceae; Planktomarina |
| 9 | ASV_15 | 2.16 | Bacteria; Bacteroidetes; Bacteroidia; Flavobacteriales; Flavobacteriaceae; NS5 marine group |
| 10 | ASV_91 | 2.09 | Bacteria; Bacteroidetes; Bacteroidia; Flavobacteriales; Cryomorphaceae; NS10 marine group |
| ISSG-SSTC | 1 | ASV_24 | 1.40 | Bacteria; Cyanobacteria; Oxyphotobacteria; Synechococcales; Cyanobiaceae; Prochlorococcus MIT9313 |
| 2 | ASV_6 | 1.32 | Bacteria; Cyanobacteria; Oxyphotobacteria; Synechococcales; Cyanobiaceae; Synechococcus CC9902 |
| 3 | ASV_105 | 1.31 | Bacteria; Proteobacteria; Alphaproteobacteria; Rhodobacterales; Rhodobacteraceae |
| 4 | ASV_122 | 1.30 | Bacteria; Bacteroidetes; Bacteroidia; Flavobacteriales; Flavobacteriaceae; NS5 marine group |
| 5 | ASV_25 | 1.27 | Bacteria; Bacteroidetes; Bacteroidia; Flavobacteriales; Flavobacteriaceae; NS4 marine group |
| 6 | ASV_2 | 1.27 | Bacteria; Cyanobacteria; Oxyphotobacteria; Synechococcales; Cyanobiaceae; Prochlorococcus MIT9313 |
| 7 | ASV_146 | 1.25 | Bacteria; Bacteroidetes; Bacteroidia; Flavobacteriales; Flavobacteriaceae; NS5 marine group |
| 8 | ASV_94 | 1.25 | Bacteria; Proteobacteria; Alphaproteobacteria; Puniceispirillales; SAR116 clade |
| 9 | ASV_139 | 1.21 | Bacteria; Proteobacteria; Gammaproteobacteria; SAR86 clade |
| 10 | ASV_7 | 1.20 | Bacteria; Bacteroidetes; Bacteroidia; Flavobacteriales; Flavobacteriaceae; NS2b marine group |
