# Supplementary material for: Hydrographic fronts shape productivity, nitrogen fixation, and microbial community composition in the South Indian Ocean and the Southern Ocean
Source: Copernicus journal article supplement (doi:10.5194/bg-2021-52), 2021-03-15
Supplement: Supplementary file 1 [file bg-2021-52-supplement.zip › Supplementary/Table S7.docx]

**Table S7: Upset plots visualize the intersections of multiple sets in a comprehensive and approachable way such that one can see intersection set size of individual sets and intersection size of common samples between sets. The calculations and plots are done based on binary tables (presence/ absence) of samples merged within their provinces. Thus, the analysis is biased by inequal sample number and sequencing depth between samples. For instance, species A is found in sample 1 of the Southern Ocean but not in sample 2 and 3. In the merged sample it would be accounted as “present” for the Southern Ocean, i.e. simplifying the provinces to one homogenous sample. To provide an estimate how well each sample is represented by the merged sample per province we provide in the following table for each sample and its representative with the following categories: 0 = shared absence (not accounted in further analysis), 1 = present in other samples of the same province but absent in sample of interest, 2 = shared between sample of interest and representative sample.**

|  | | | | |
| --- | --- | --- | --- | --- |
| **Sample** | **0** | **1** | **2** | **Percent shared (%)** |
| **Eukaryotes (18S)** | | | | |
| OISO37 (and SO) | 1923 | 439 | 139 | 24% |
| OISO11 (and SO) | 1923 | 342 | 236 | 41% |
| OISOE (and SO) | 1923 | 216 | 362 | 63% |
| OISO7 (and SO) | 1923 | 275 | 303 | 52% |
| OSIO9 (and SO) | 1923 | 229 | 349 | 60% |
| OISO4 (and SSTC) | 1917 | 263 | 321 | 55% |
| OISO15 (and SSTC) | 1917 | 145 | 439 | 75% |
| OISO3 (and ISSG) | 586 | 852 | 1063 | 56% |
| OISO2 (and ISSG) | 586 | 1031 | 884 | 46% |
| OISO16 (and ISSG) | 586 | 1325 | 590 | 31% |
| OISO18 (and ISSG) | 586 | 1002 | 913 | 48% |
| **Prokaryotes (16S)** | | | | |
| OISO37 (and SO) | 551 | 258 | 232 | 47% |
| OISO11 (and SO) | 551 | 251 | 239 | 49% |
| OISOE (and SO) | 551 | 218 | 272 | 56% |
| OISO7 (and SO) | 551 | 230 | 260 | 53% |
| OISO9 (and SO) | 551 | 246 | 244 | 50% |
| OISO10 (and SO) | 551 | 224 | 266 | 54% |
| OISO4 (and SSTC) | 508 | 225 | 308 | 58% |
| OISO14 (and SSTC) | 508 | 210 | 323 | 61% |
| OISO15 (and SSTC) | 508 | 193 | 340 | 64% |
| OISO3 (and ISSG) | 455 | 199 | 387 | 66% |
| OISO2 (and ISSG) | 455 | 313 | 273 | 47% |
| OISO18 (and ISSG) | 455 | 270 | 316 | 54% |
