# Supplementary figures and images for: Hydrographic fronts shape productivity, nitrogen fixation, and microbial community composition in the South Indian Ocean and the Southern Ocean
Source: Copernicus journal article supplement (doi:10.5194/bg-2021-52), 2021-03-15

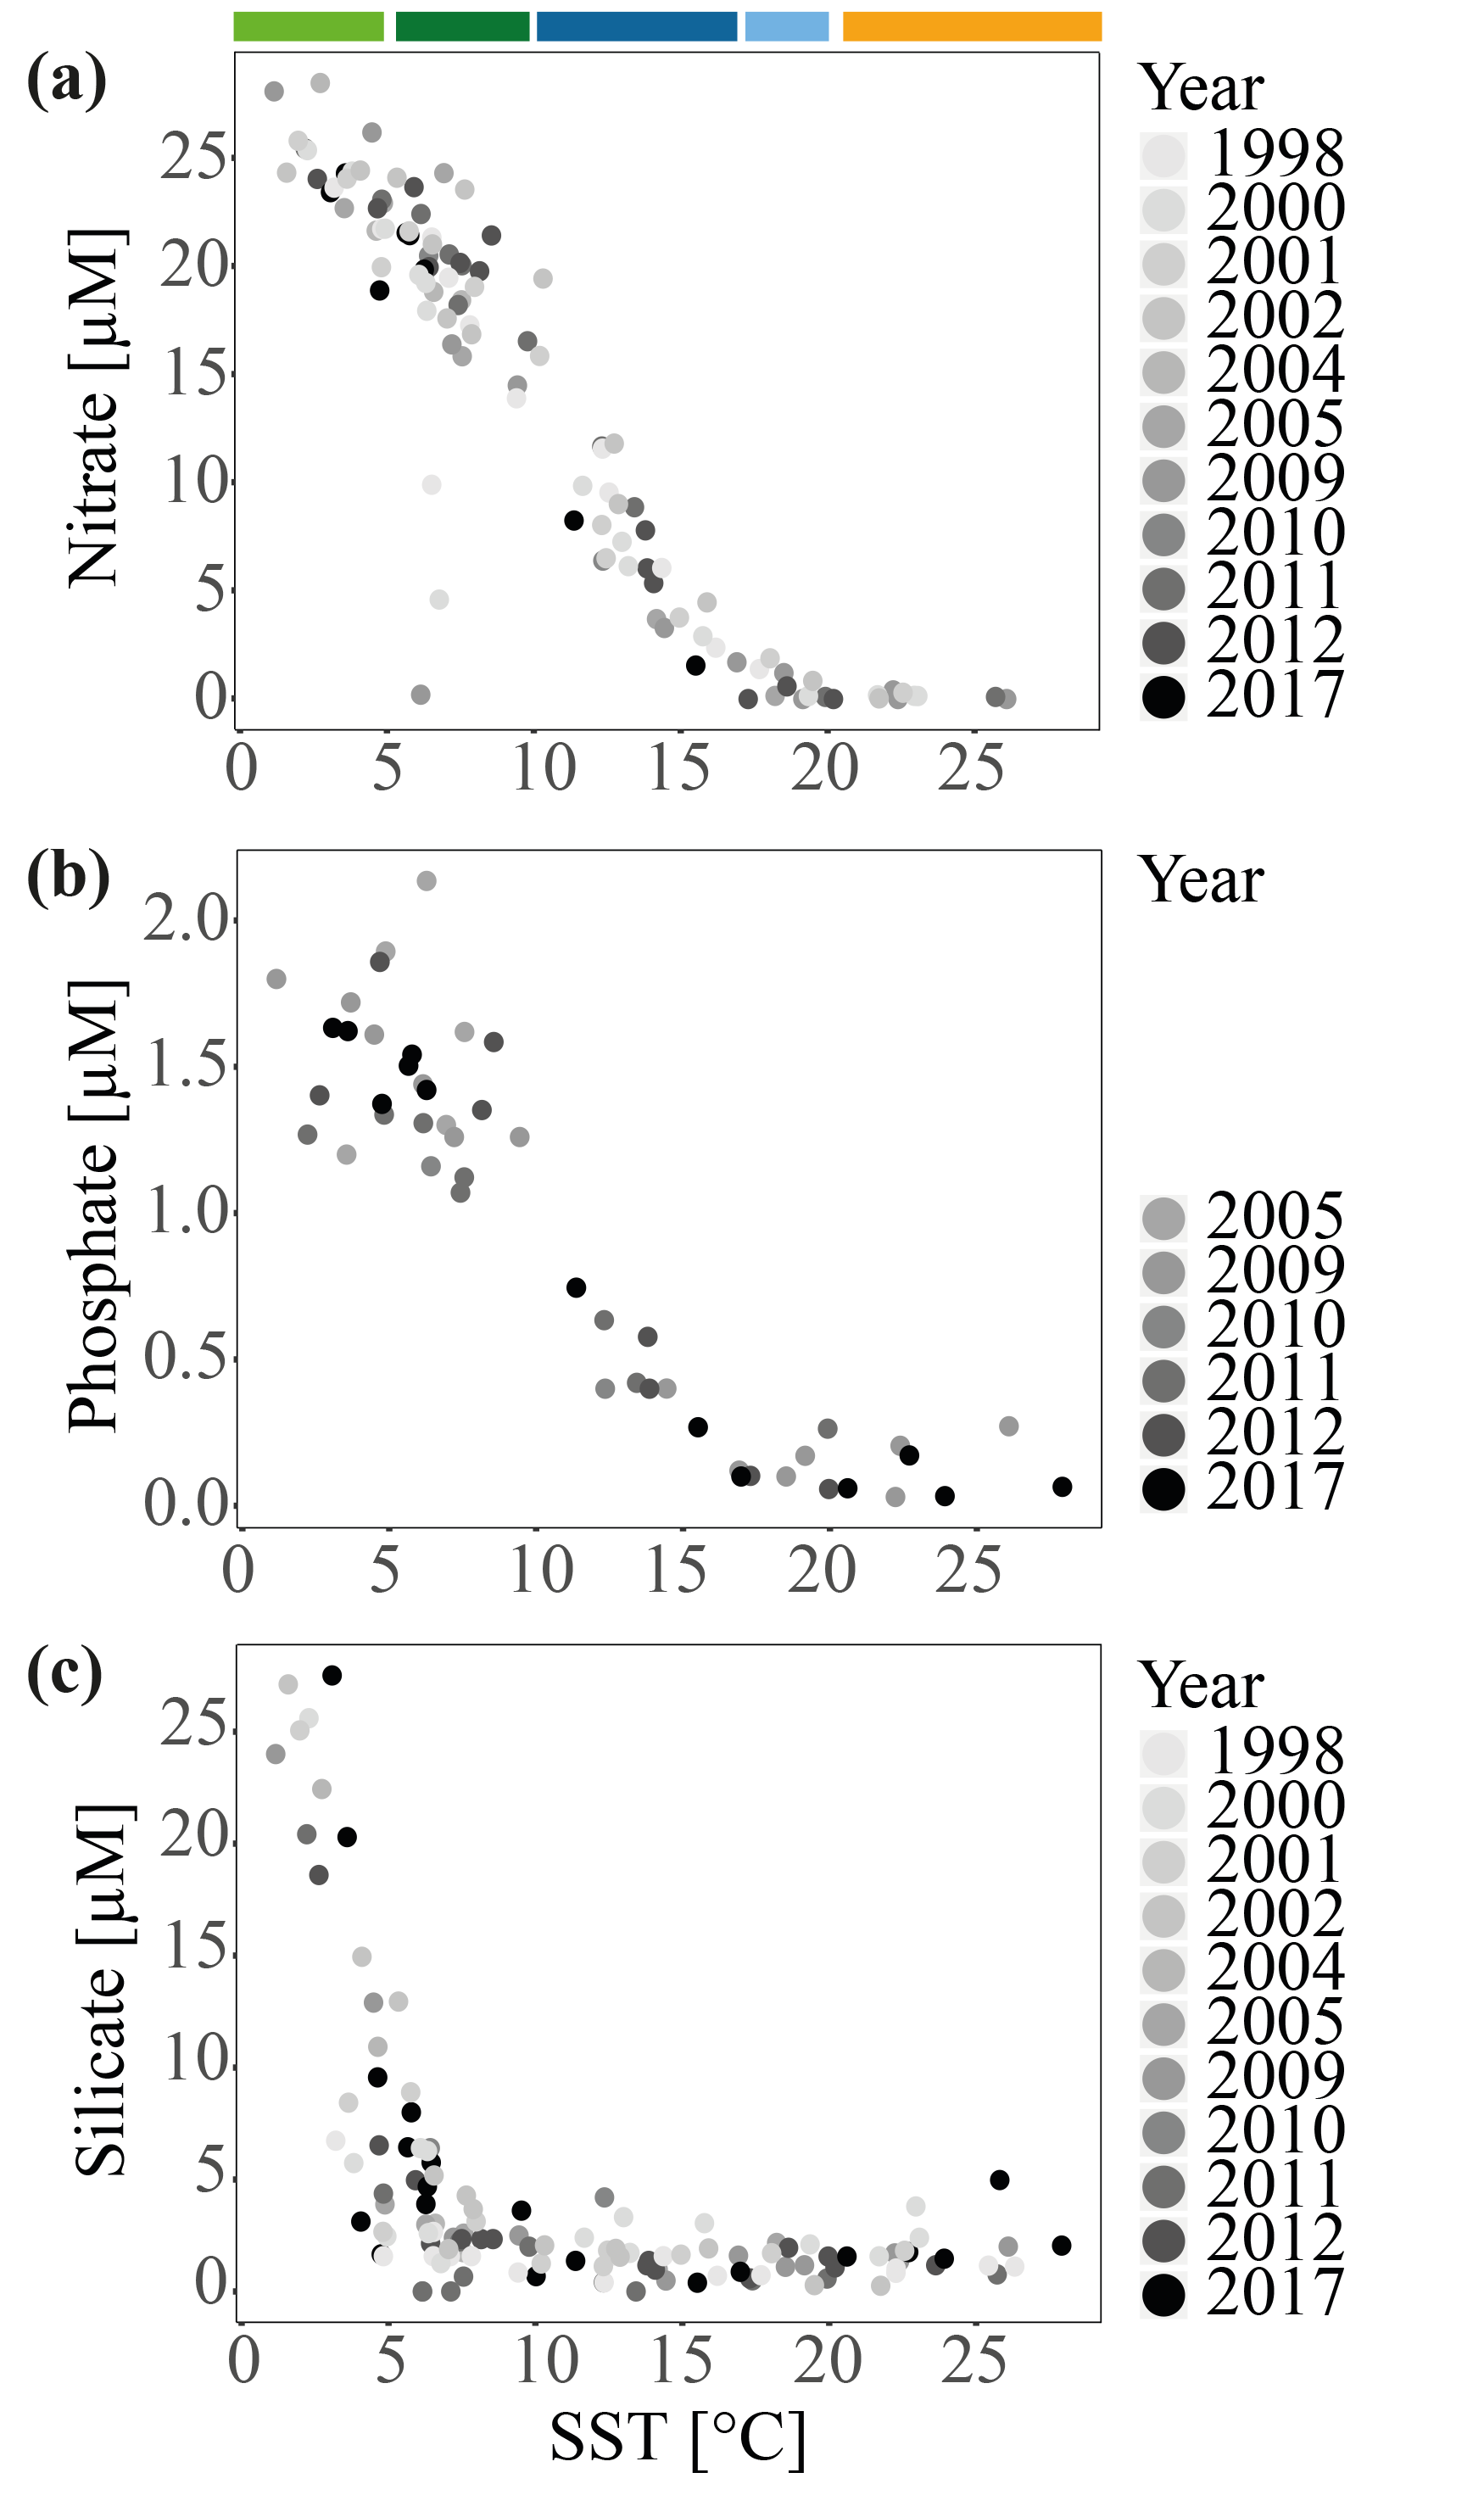

Supplement: Supplementary file 1 [file bg-2021-52-supplement.zip › Supplementary/Figure S1.tif]

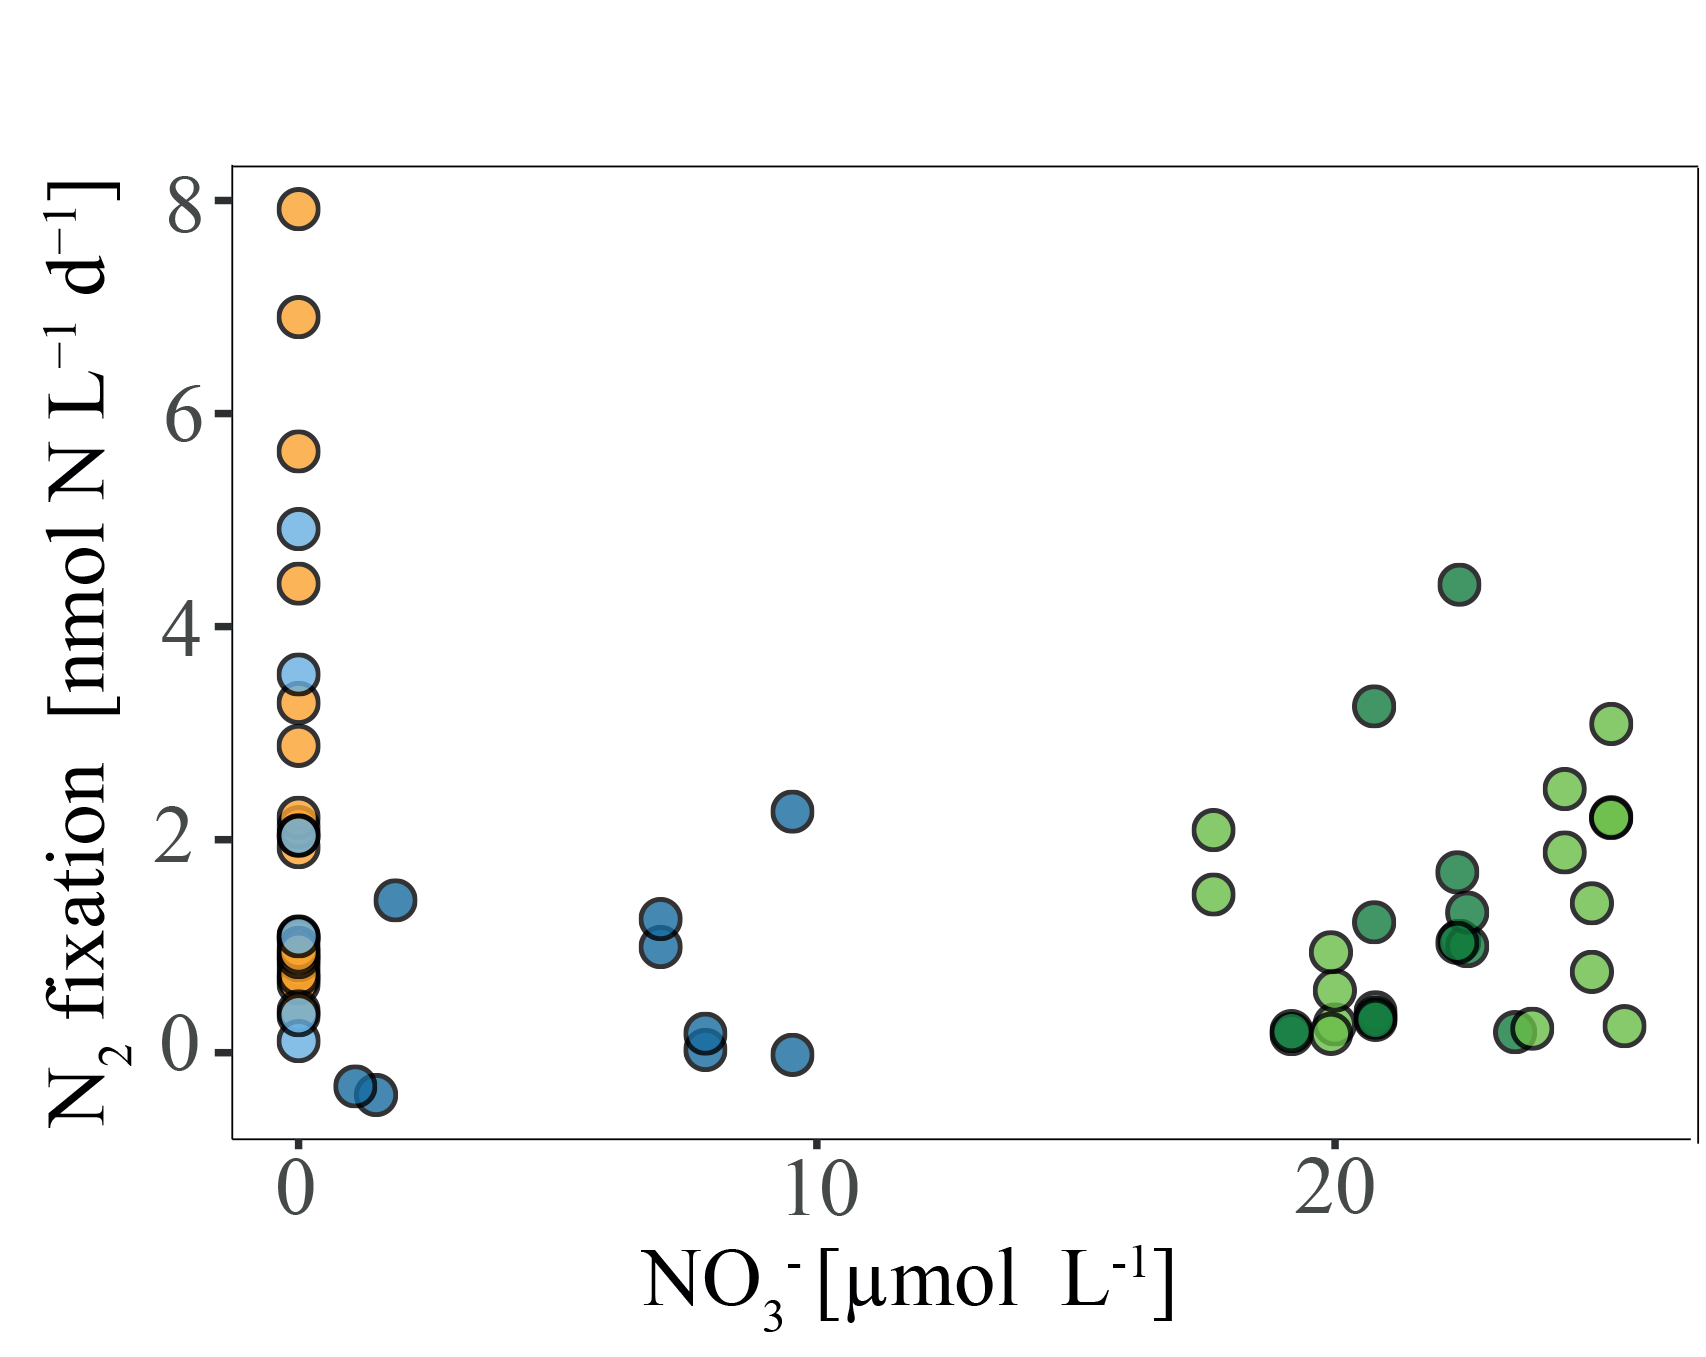

Supplement: Supplementary file 1 [file bg-2021-52-supplement.zip › Supplementary/Figure S10.tif]

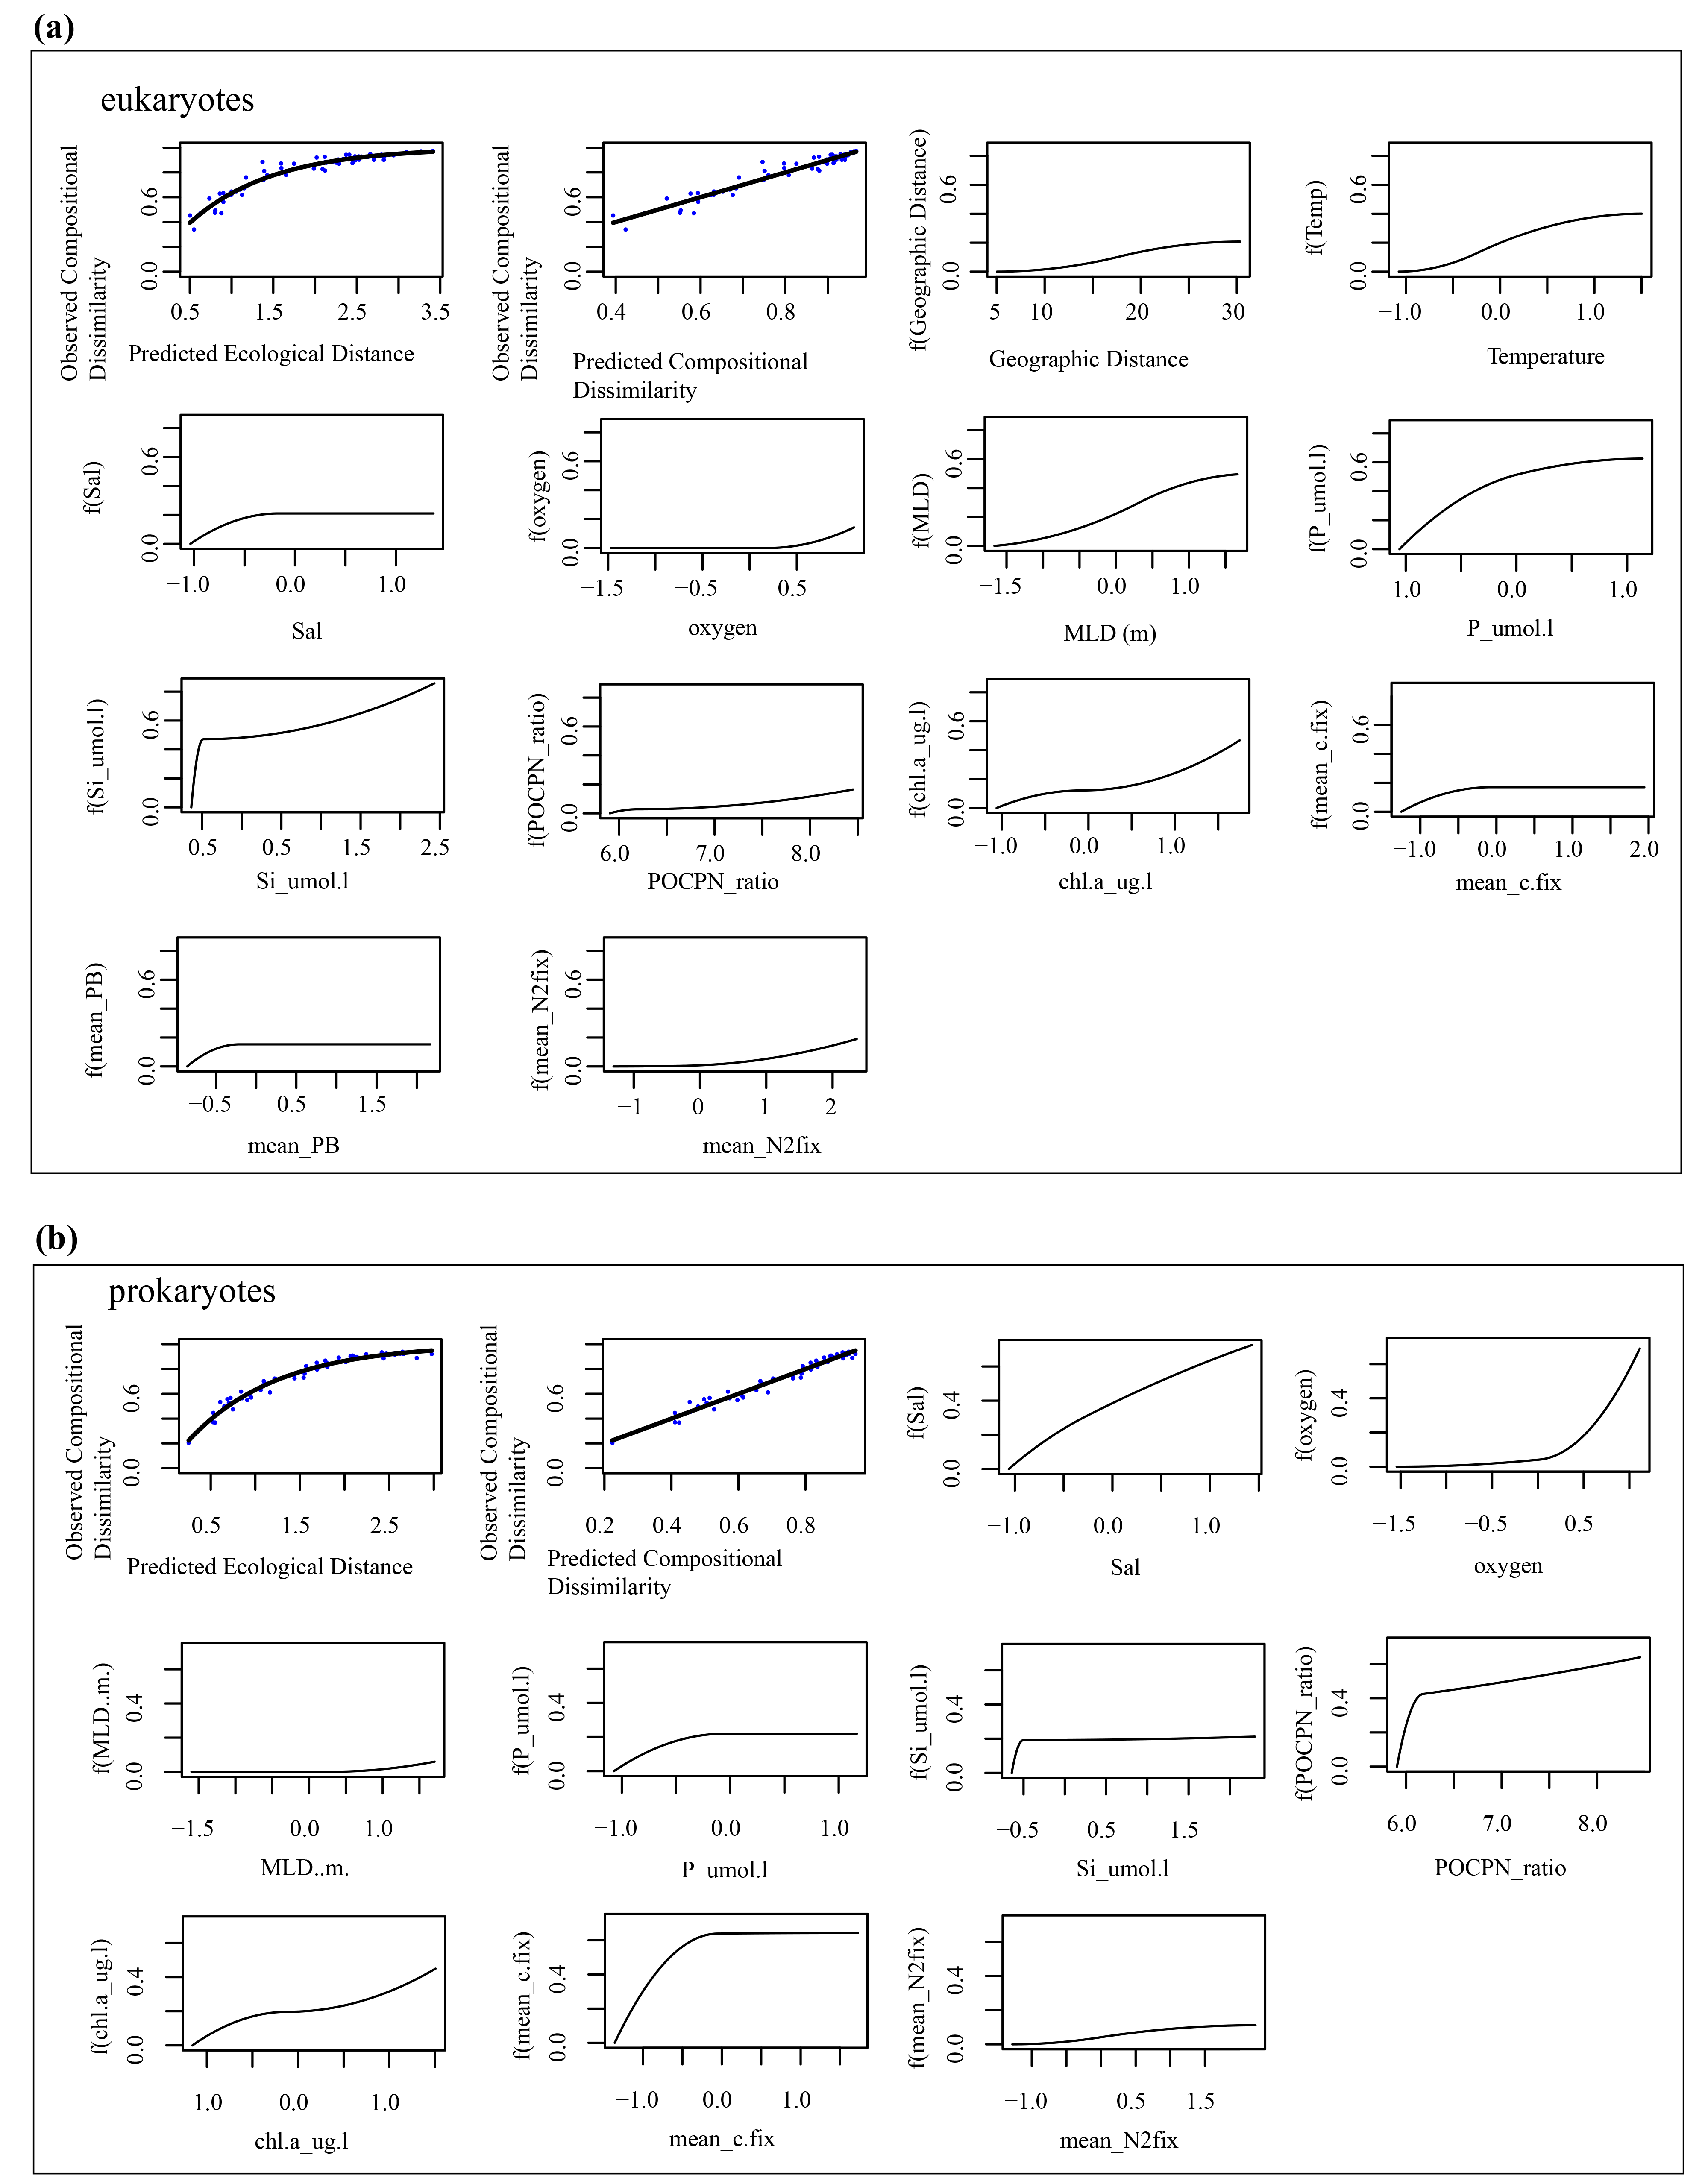

Supplement: Supplementary file 1 [file bg-2021-52-supplement.zip › Supplementary/Figure S11.tif]

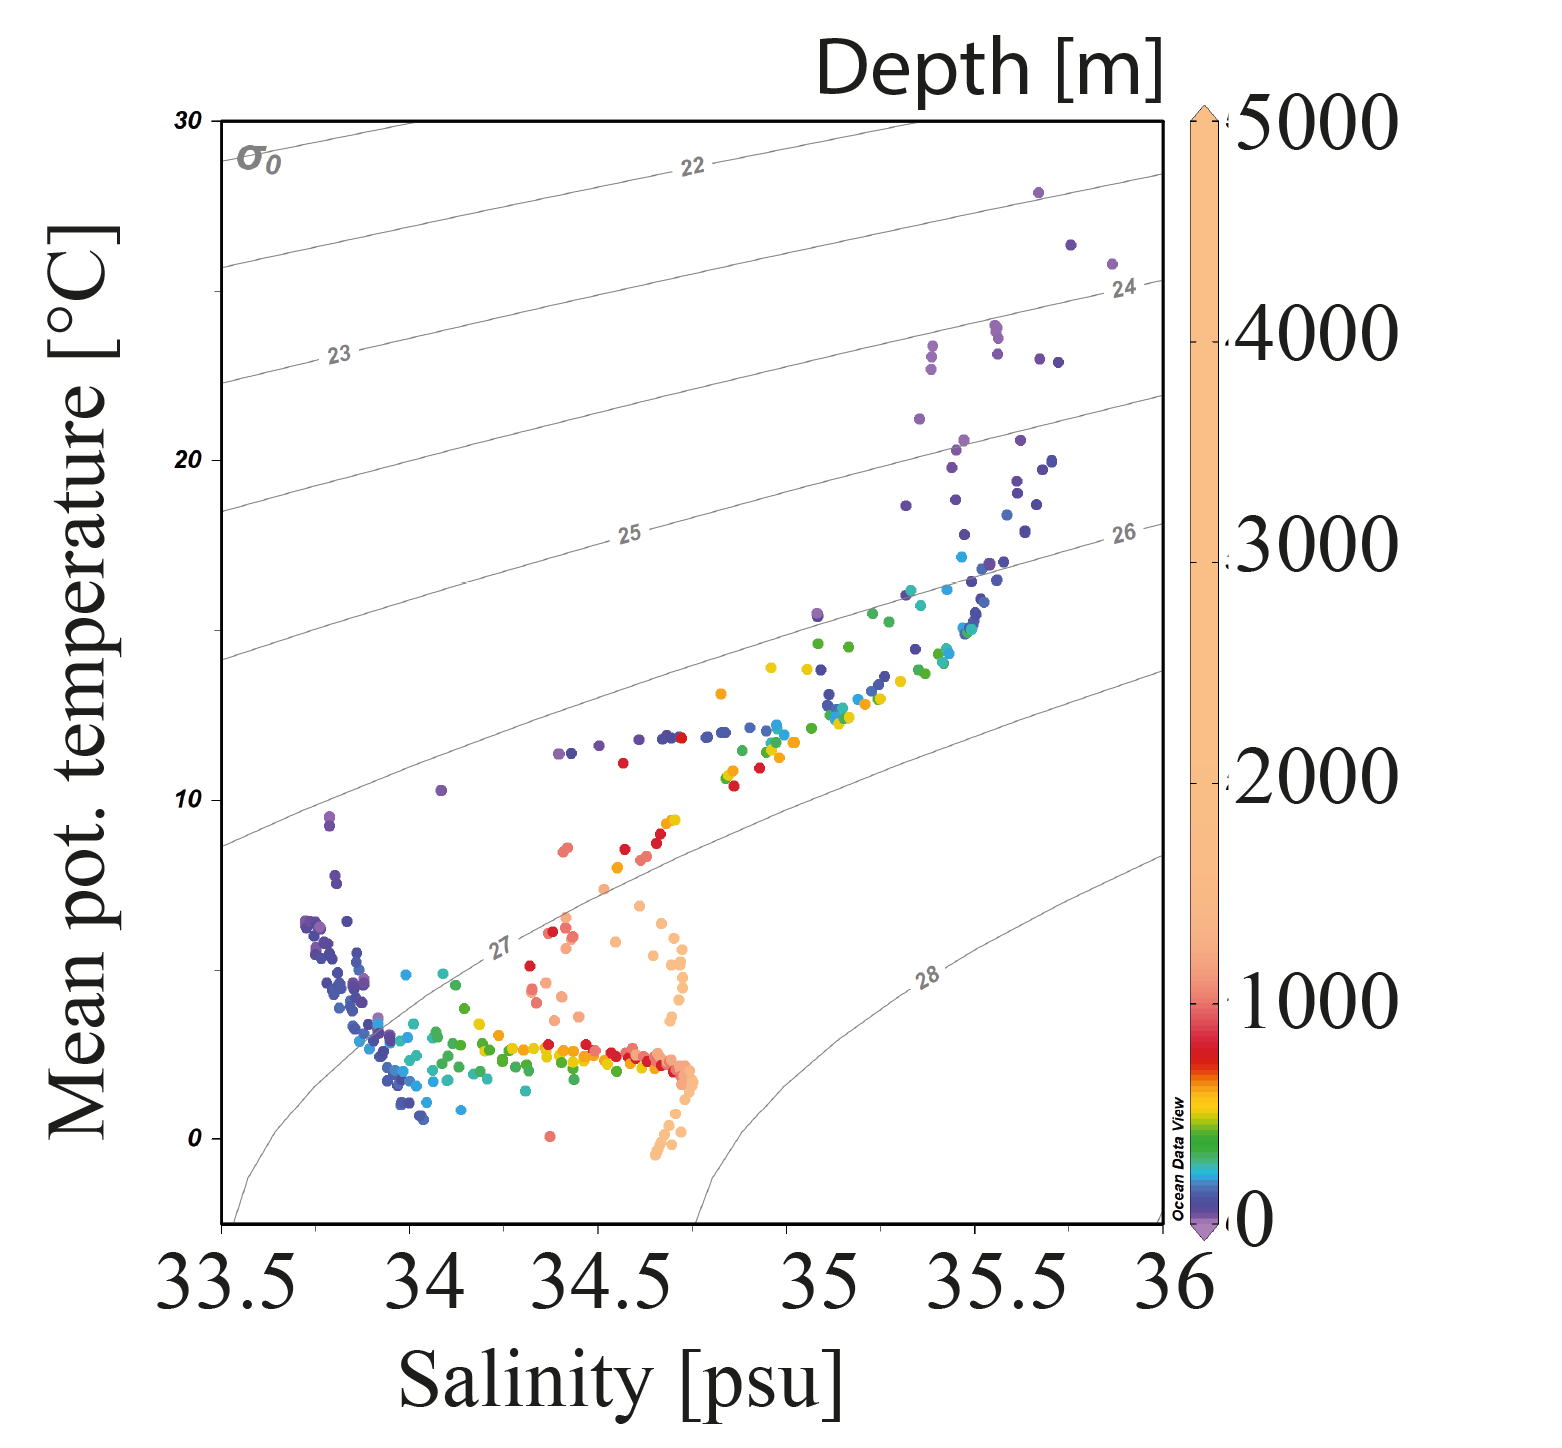

Supplement: Supplementary file 1 [file bg-2021-52-supplement.zip › Supplementary/Figure S2.tif]

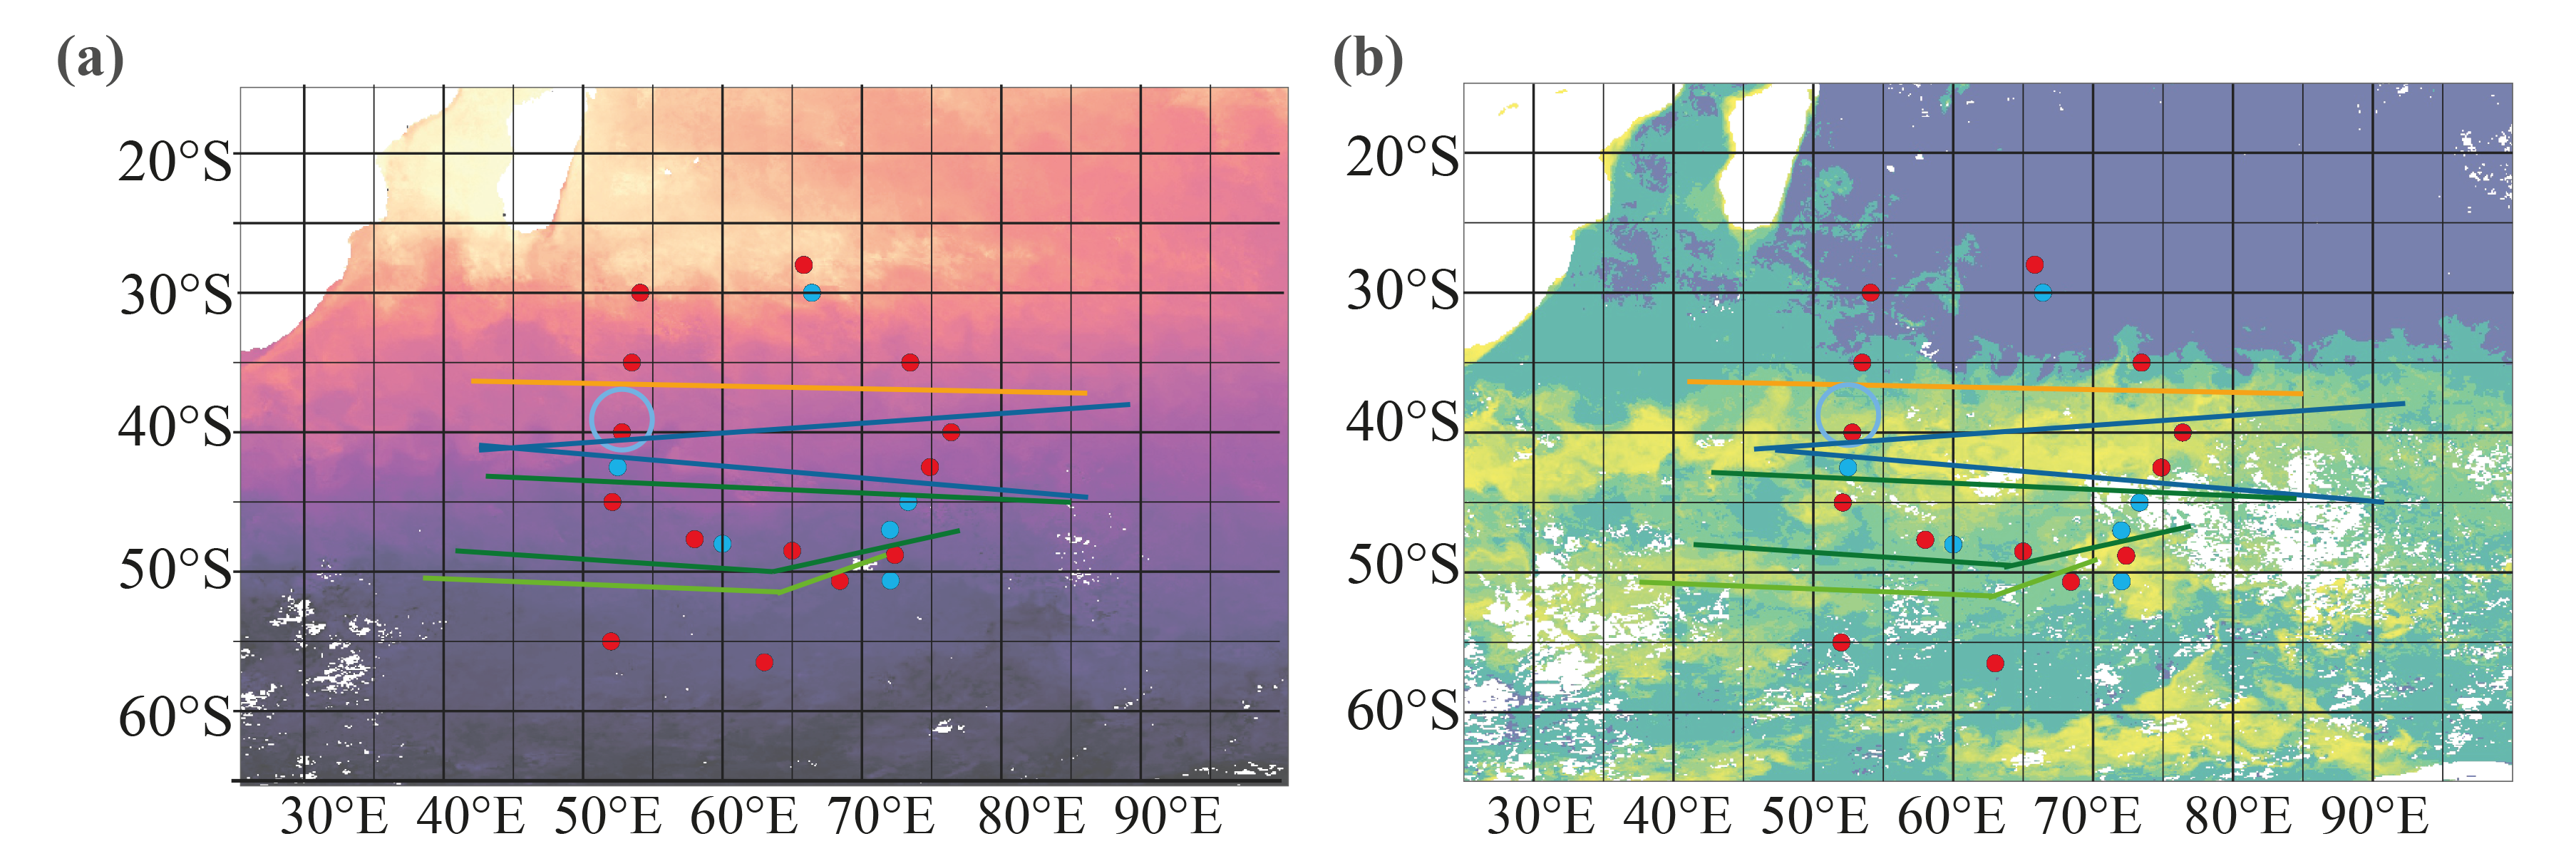

Supplement: Supplementary file 1 [file bg-2021-52-supplement.zip › Supplementary/Figure S3.tif]

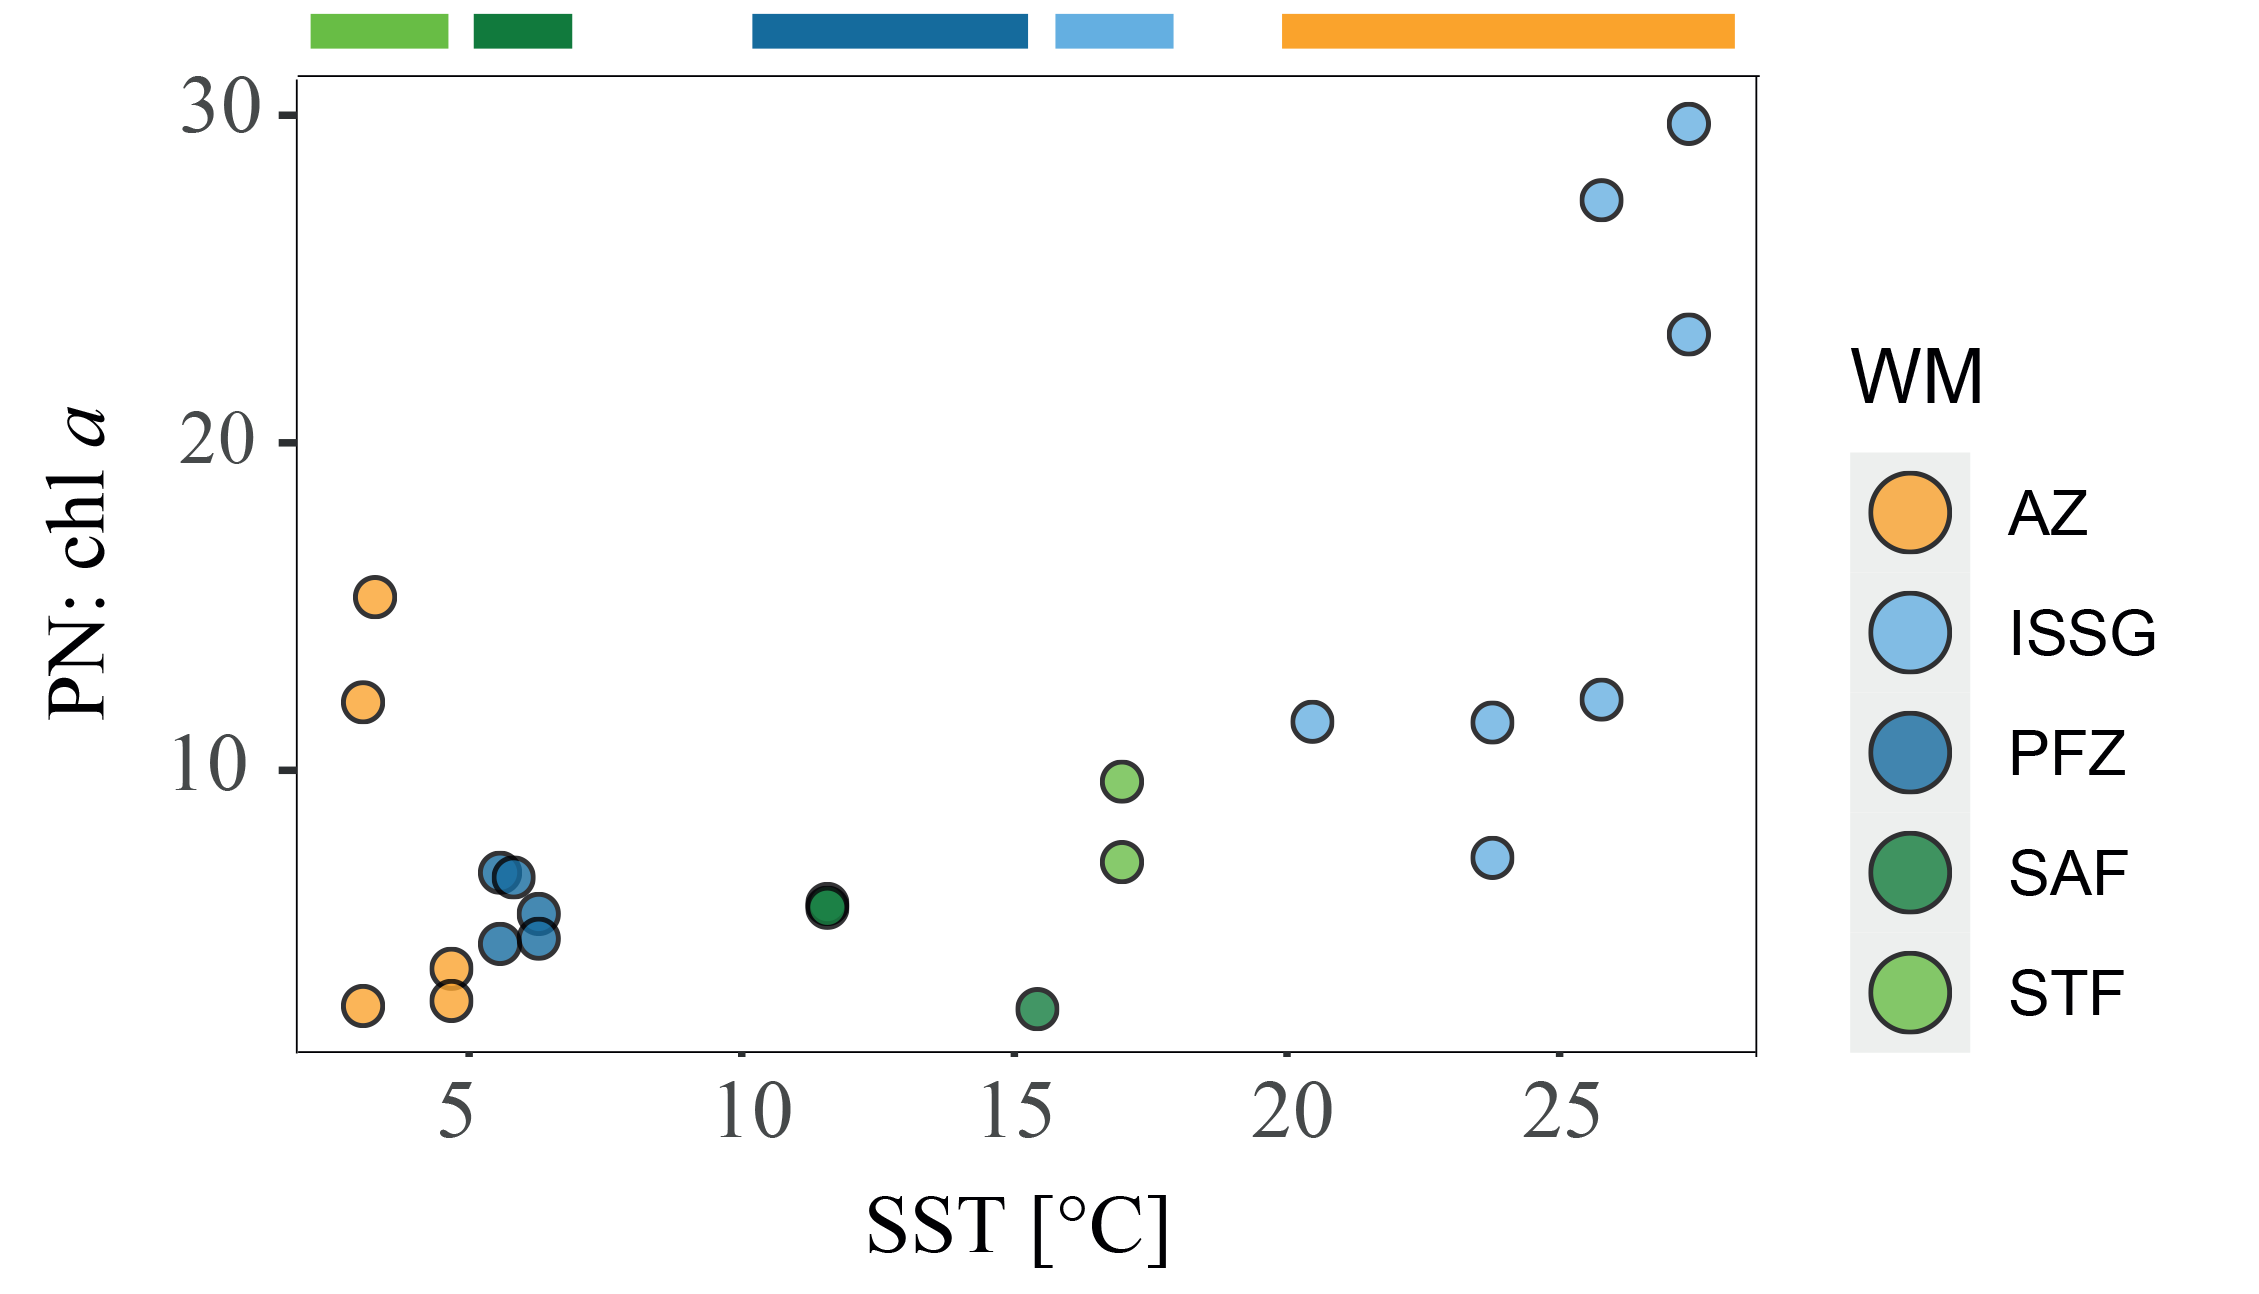

Supplement: Supplementary file 1 [file bg-2021-52-supplement.zip › Supplementary/Figure S4.tif]

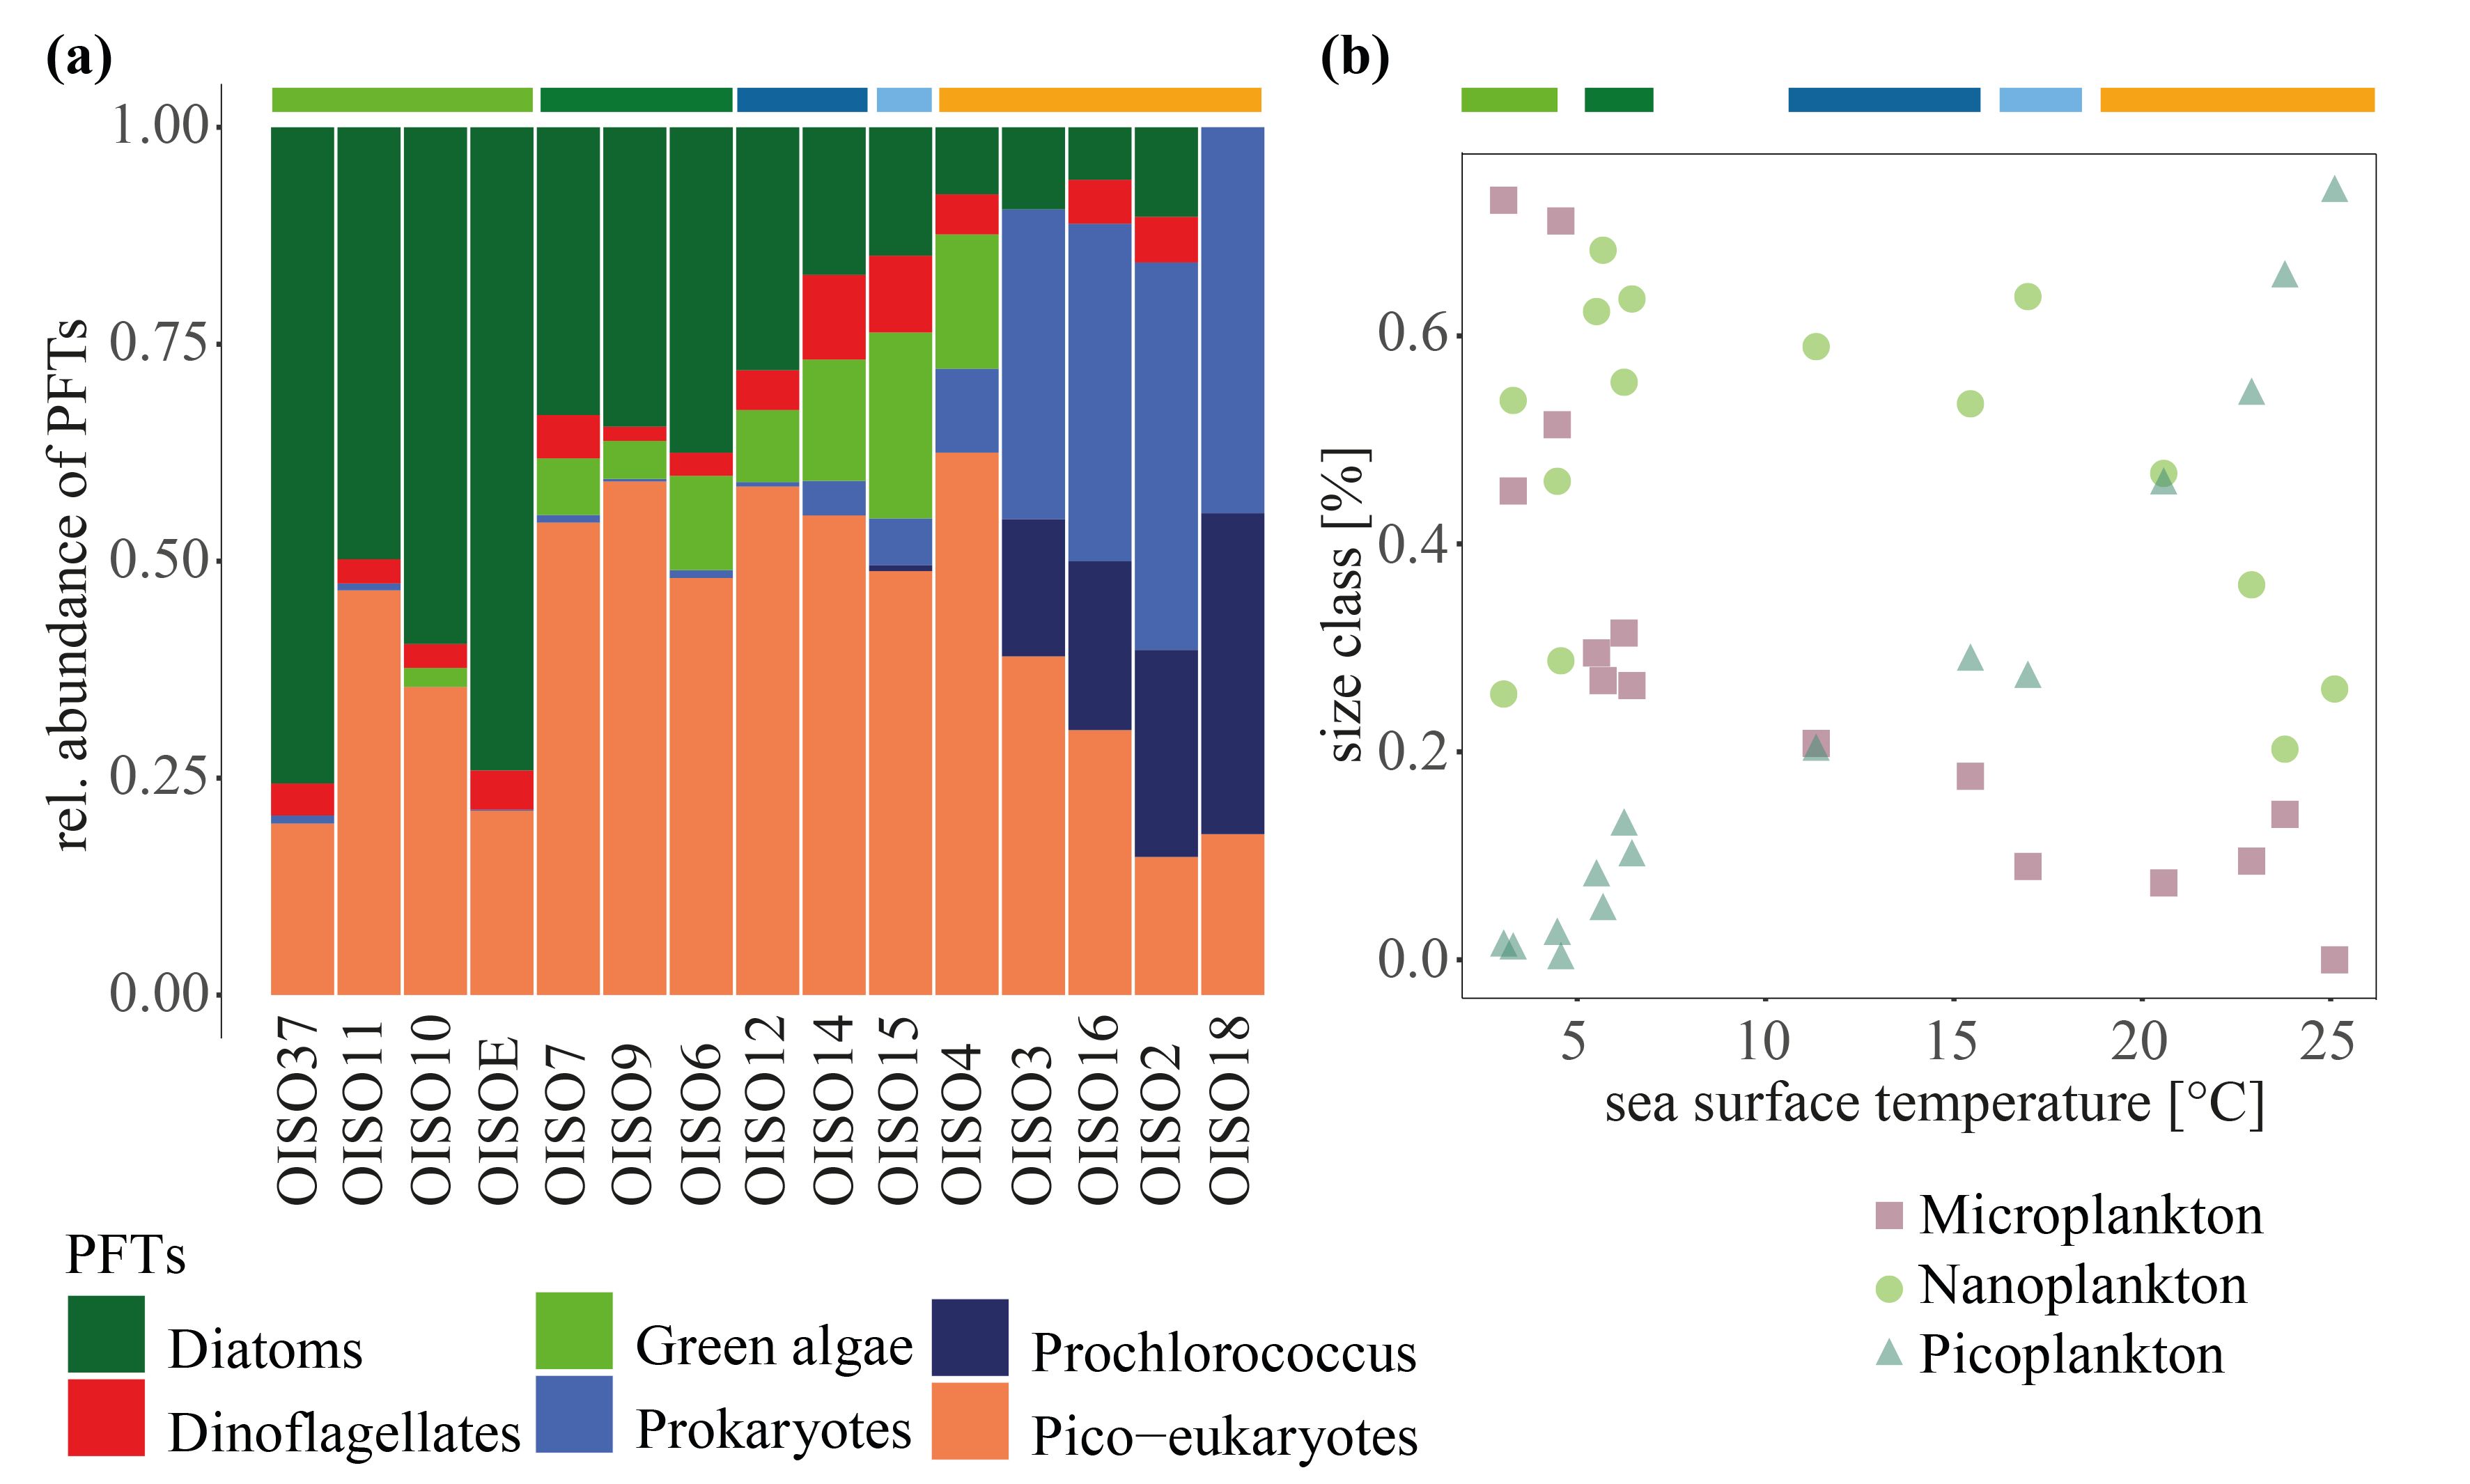

Supplement: Supplementary file 1 [file bg-2021-52-supplement.zip › Supplementary/Figure S5.tif]

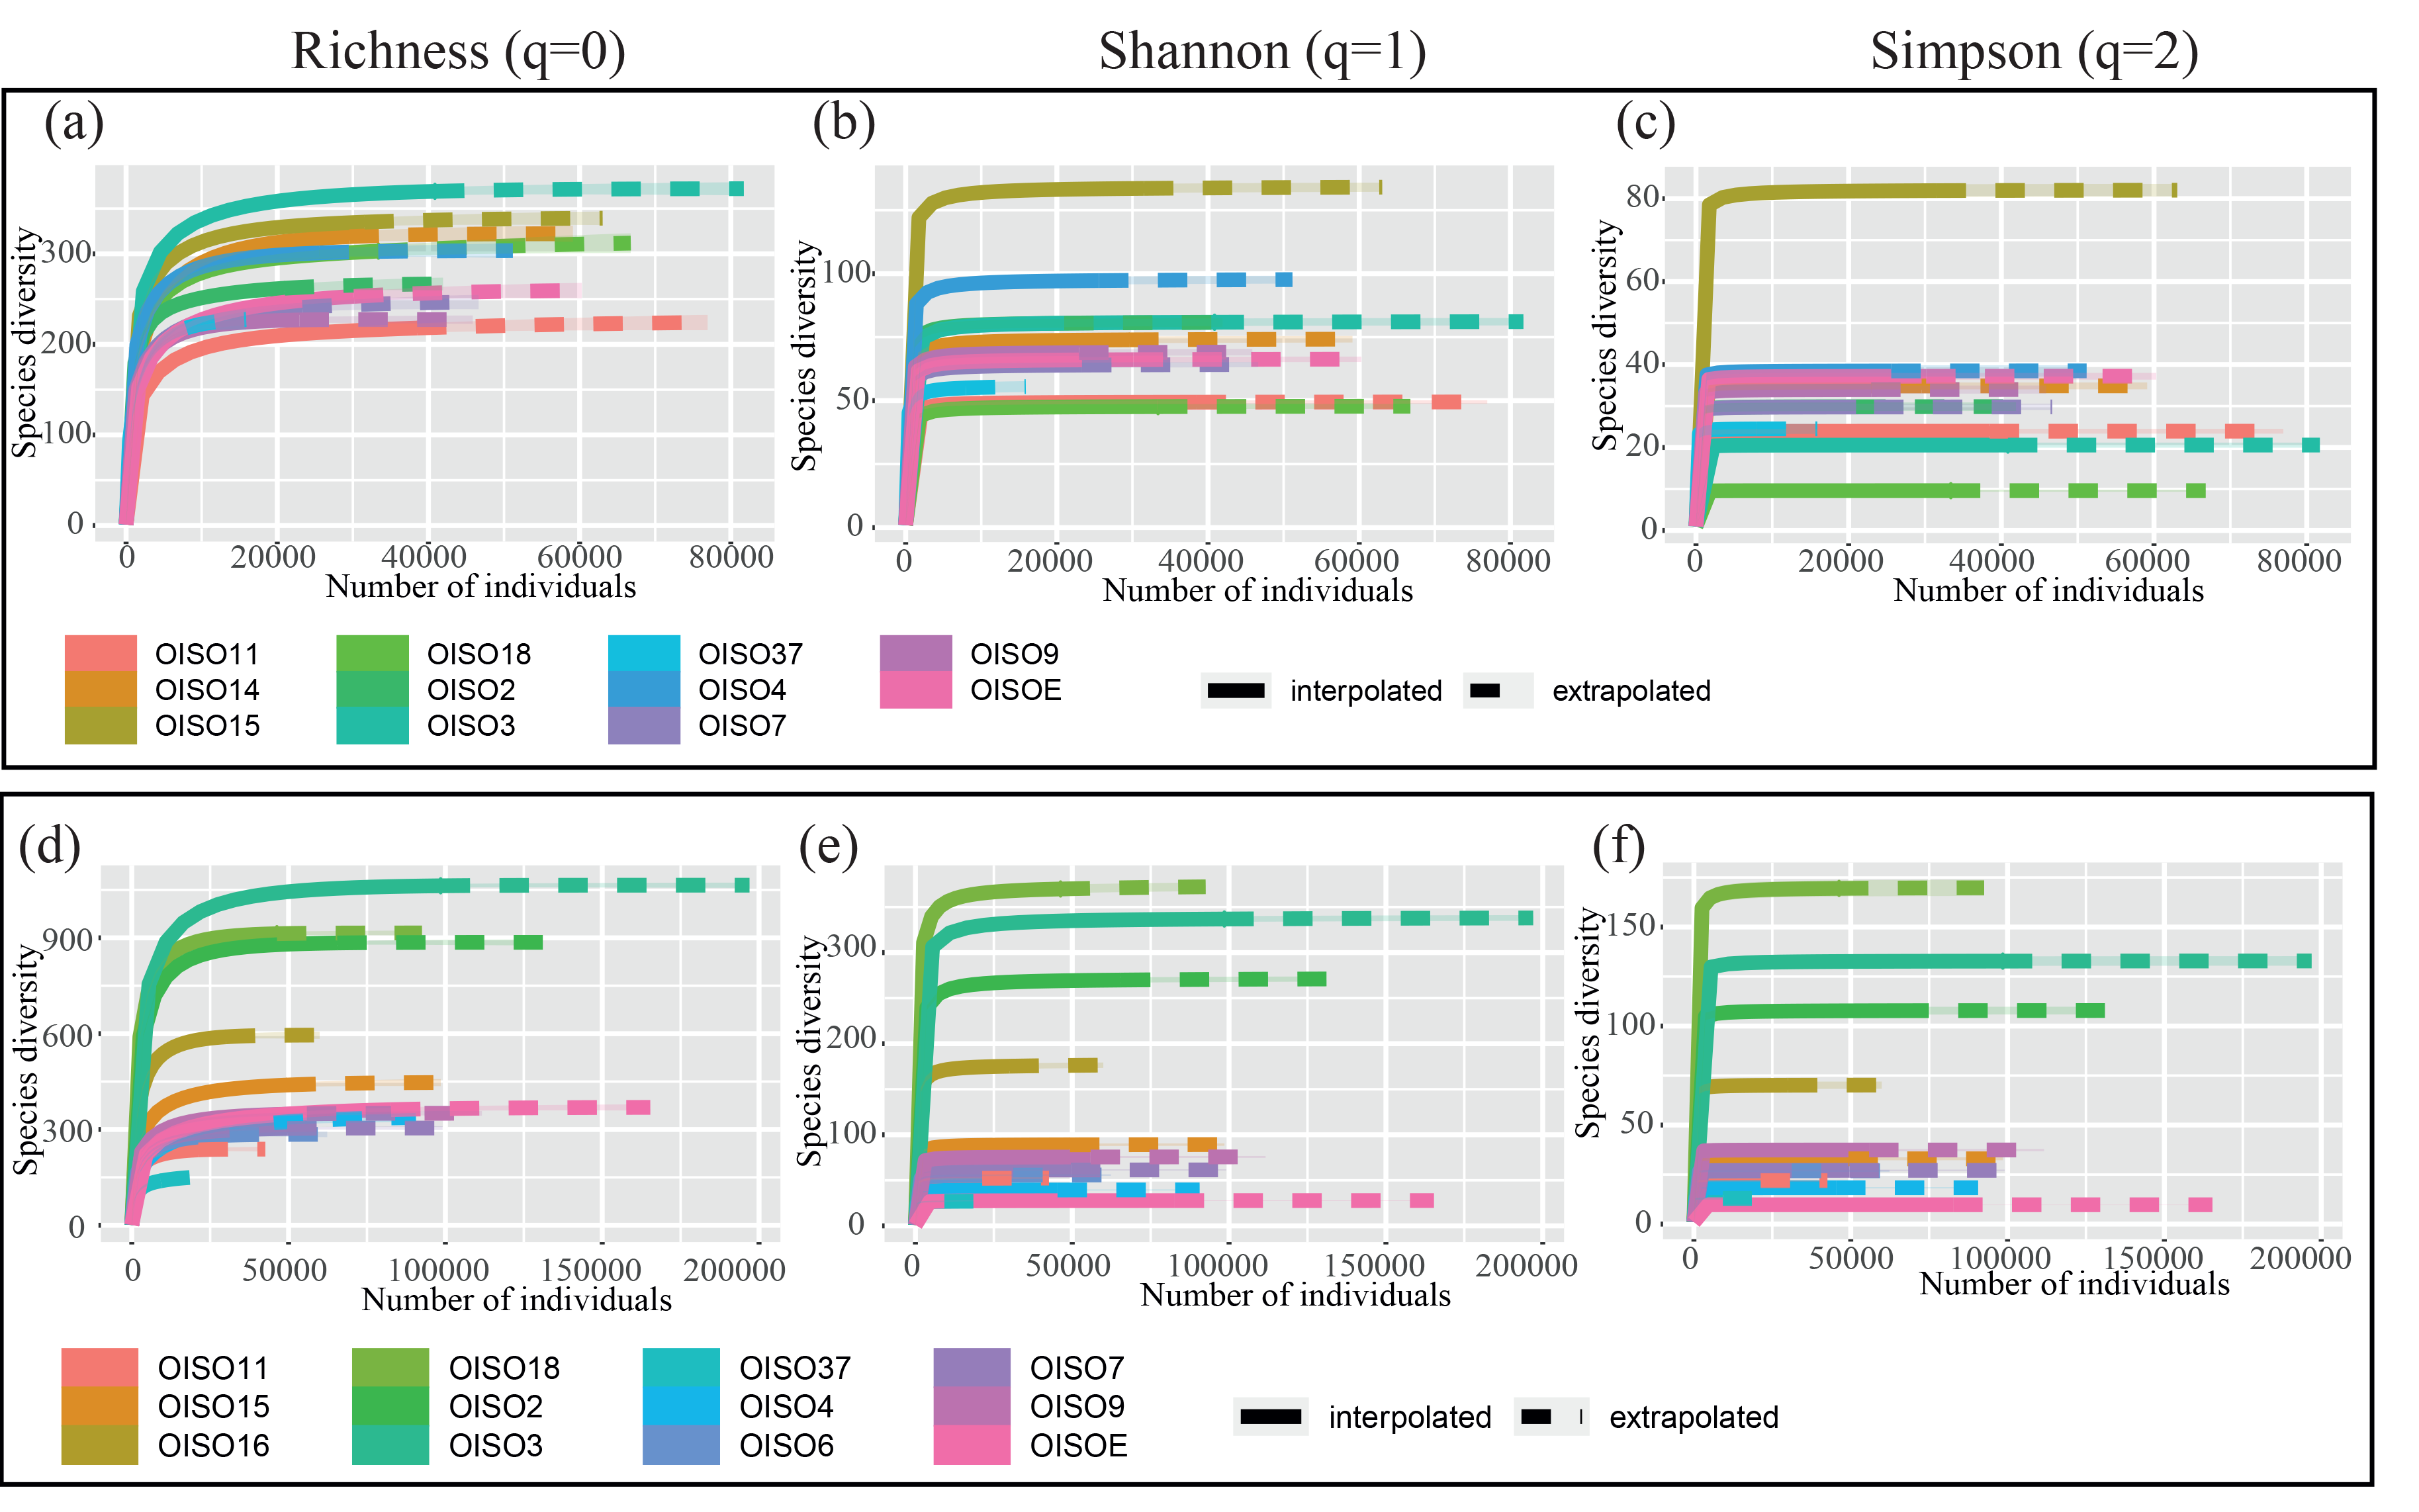

Supplement: Supplementary file 1 [file bg-2021-52-supplement.zip › Supplementary/Figure S6.tif]

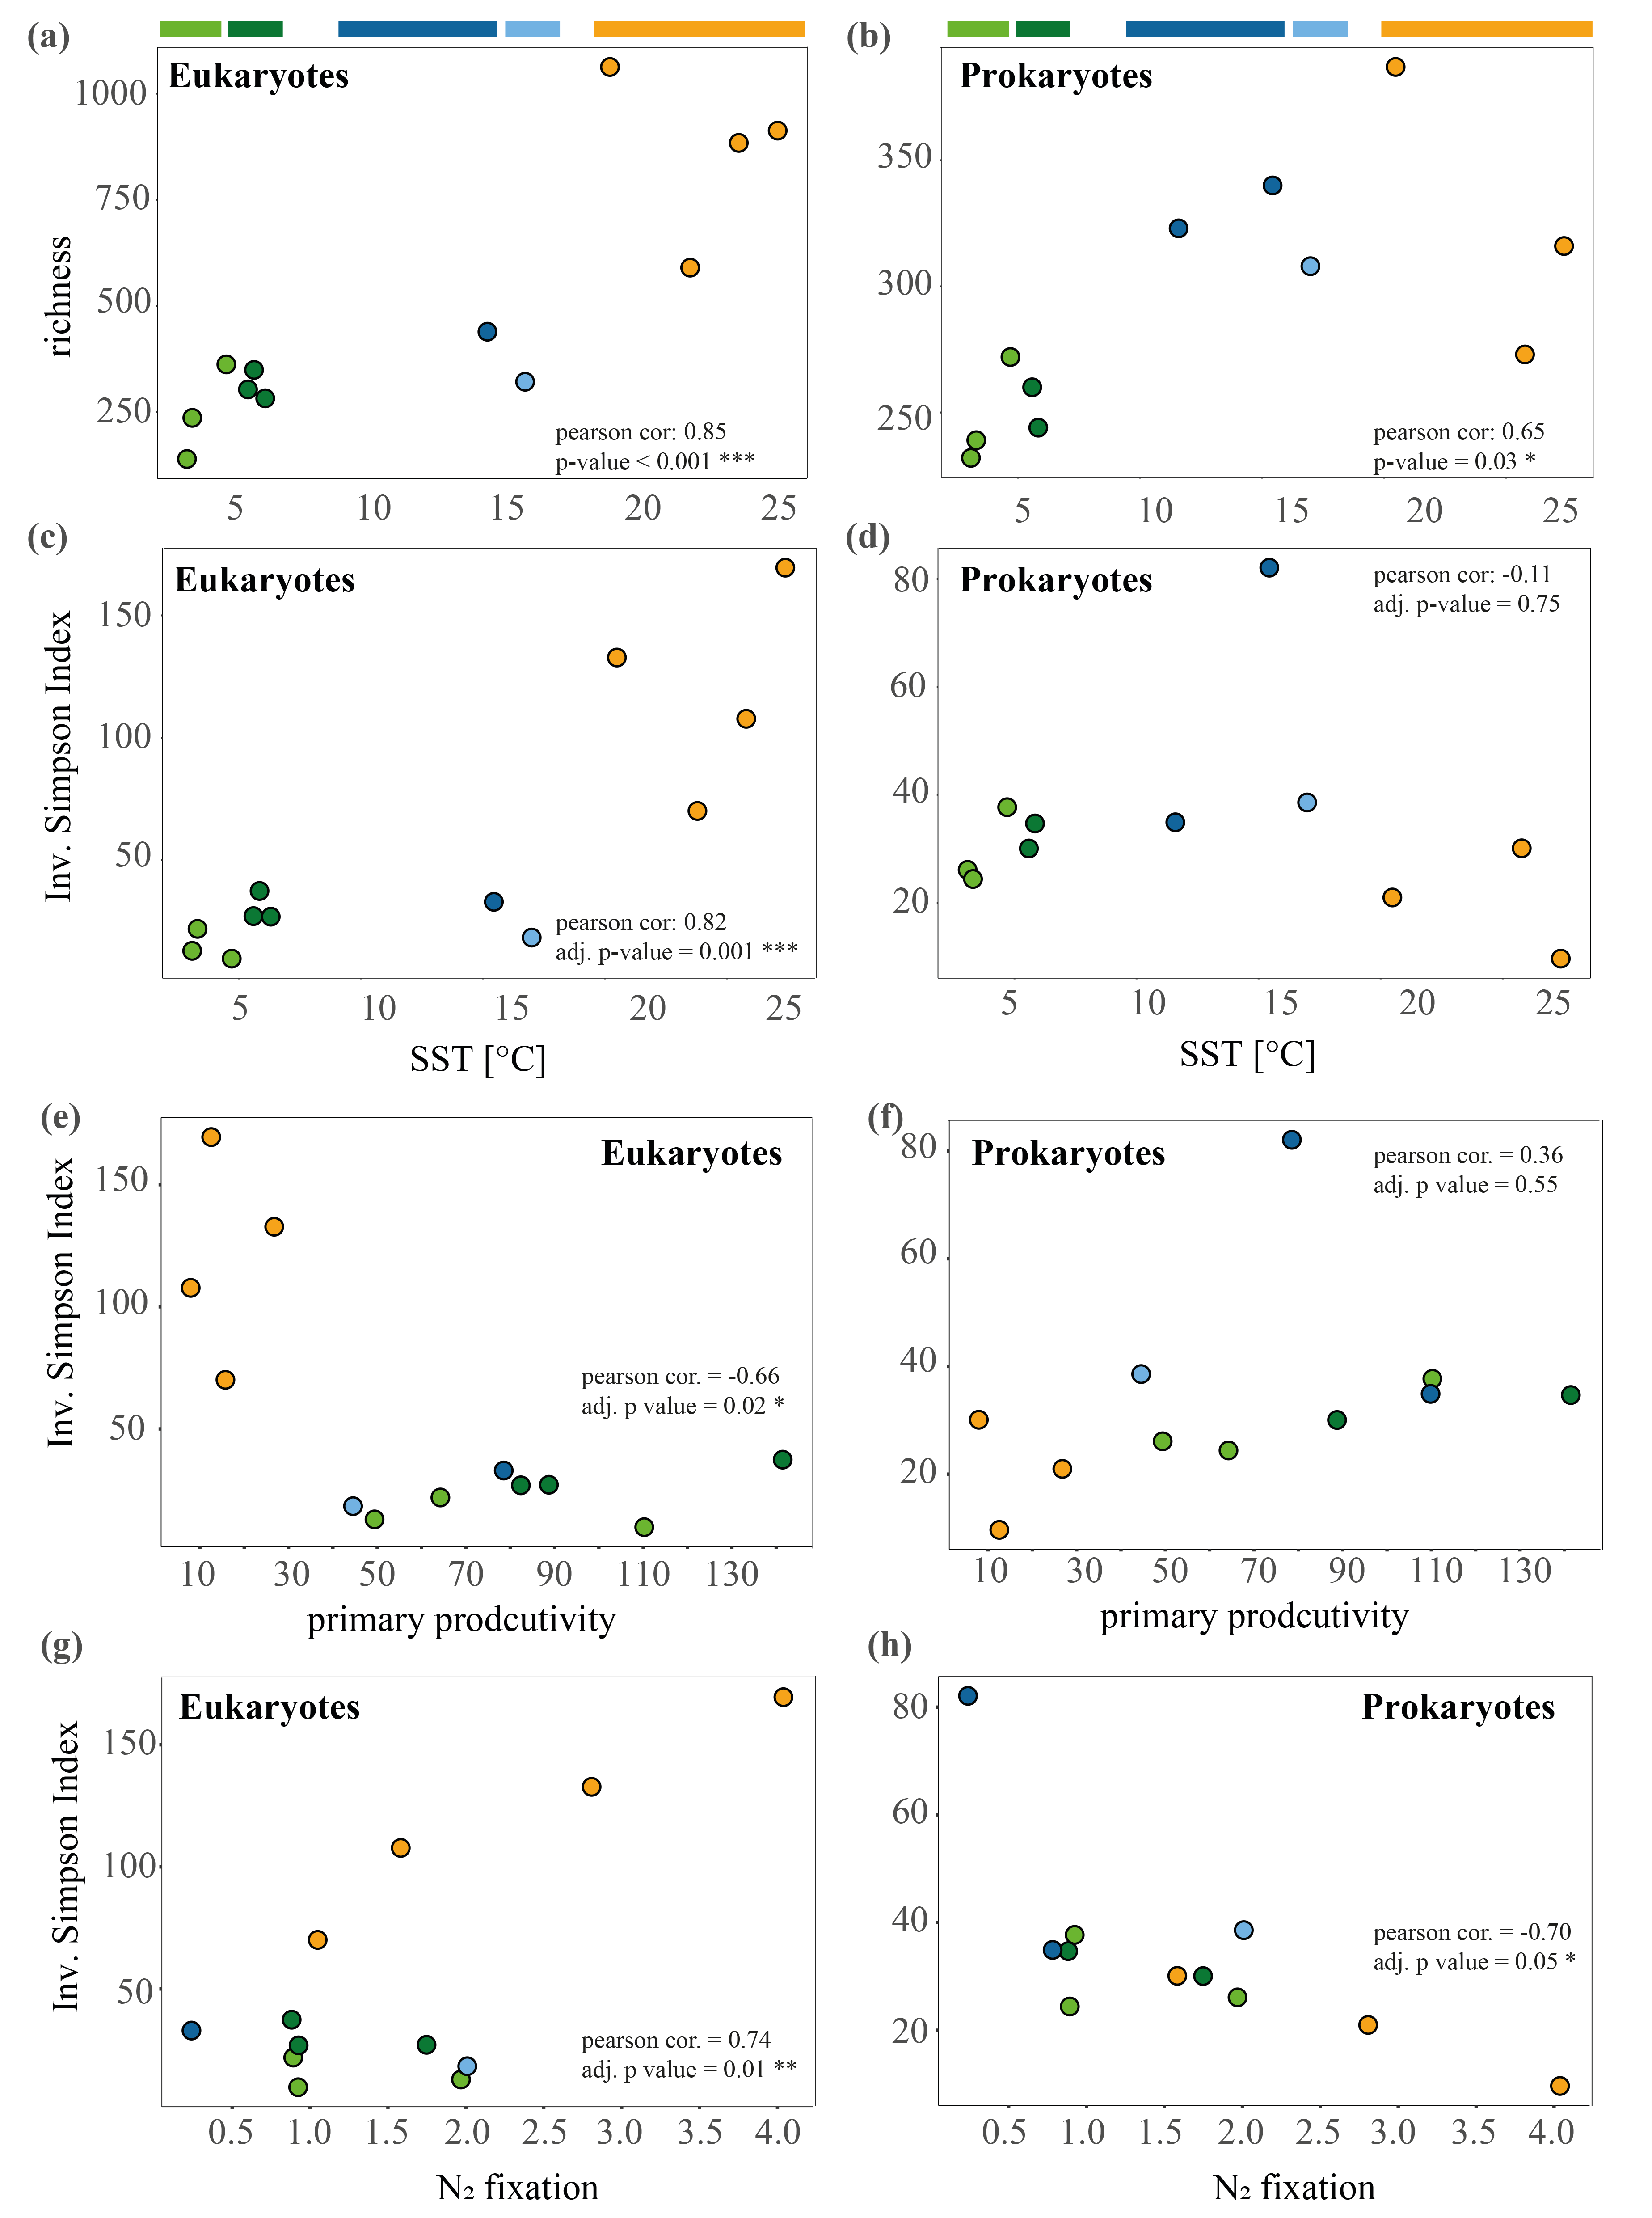

Supplement: Supplementary file 1 [file bg-2021-52-supplement.zip › Supplementary/Figure S7.tif]

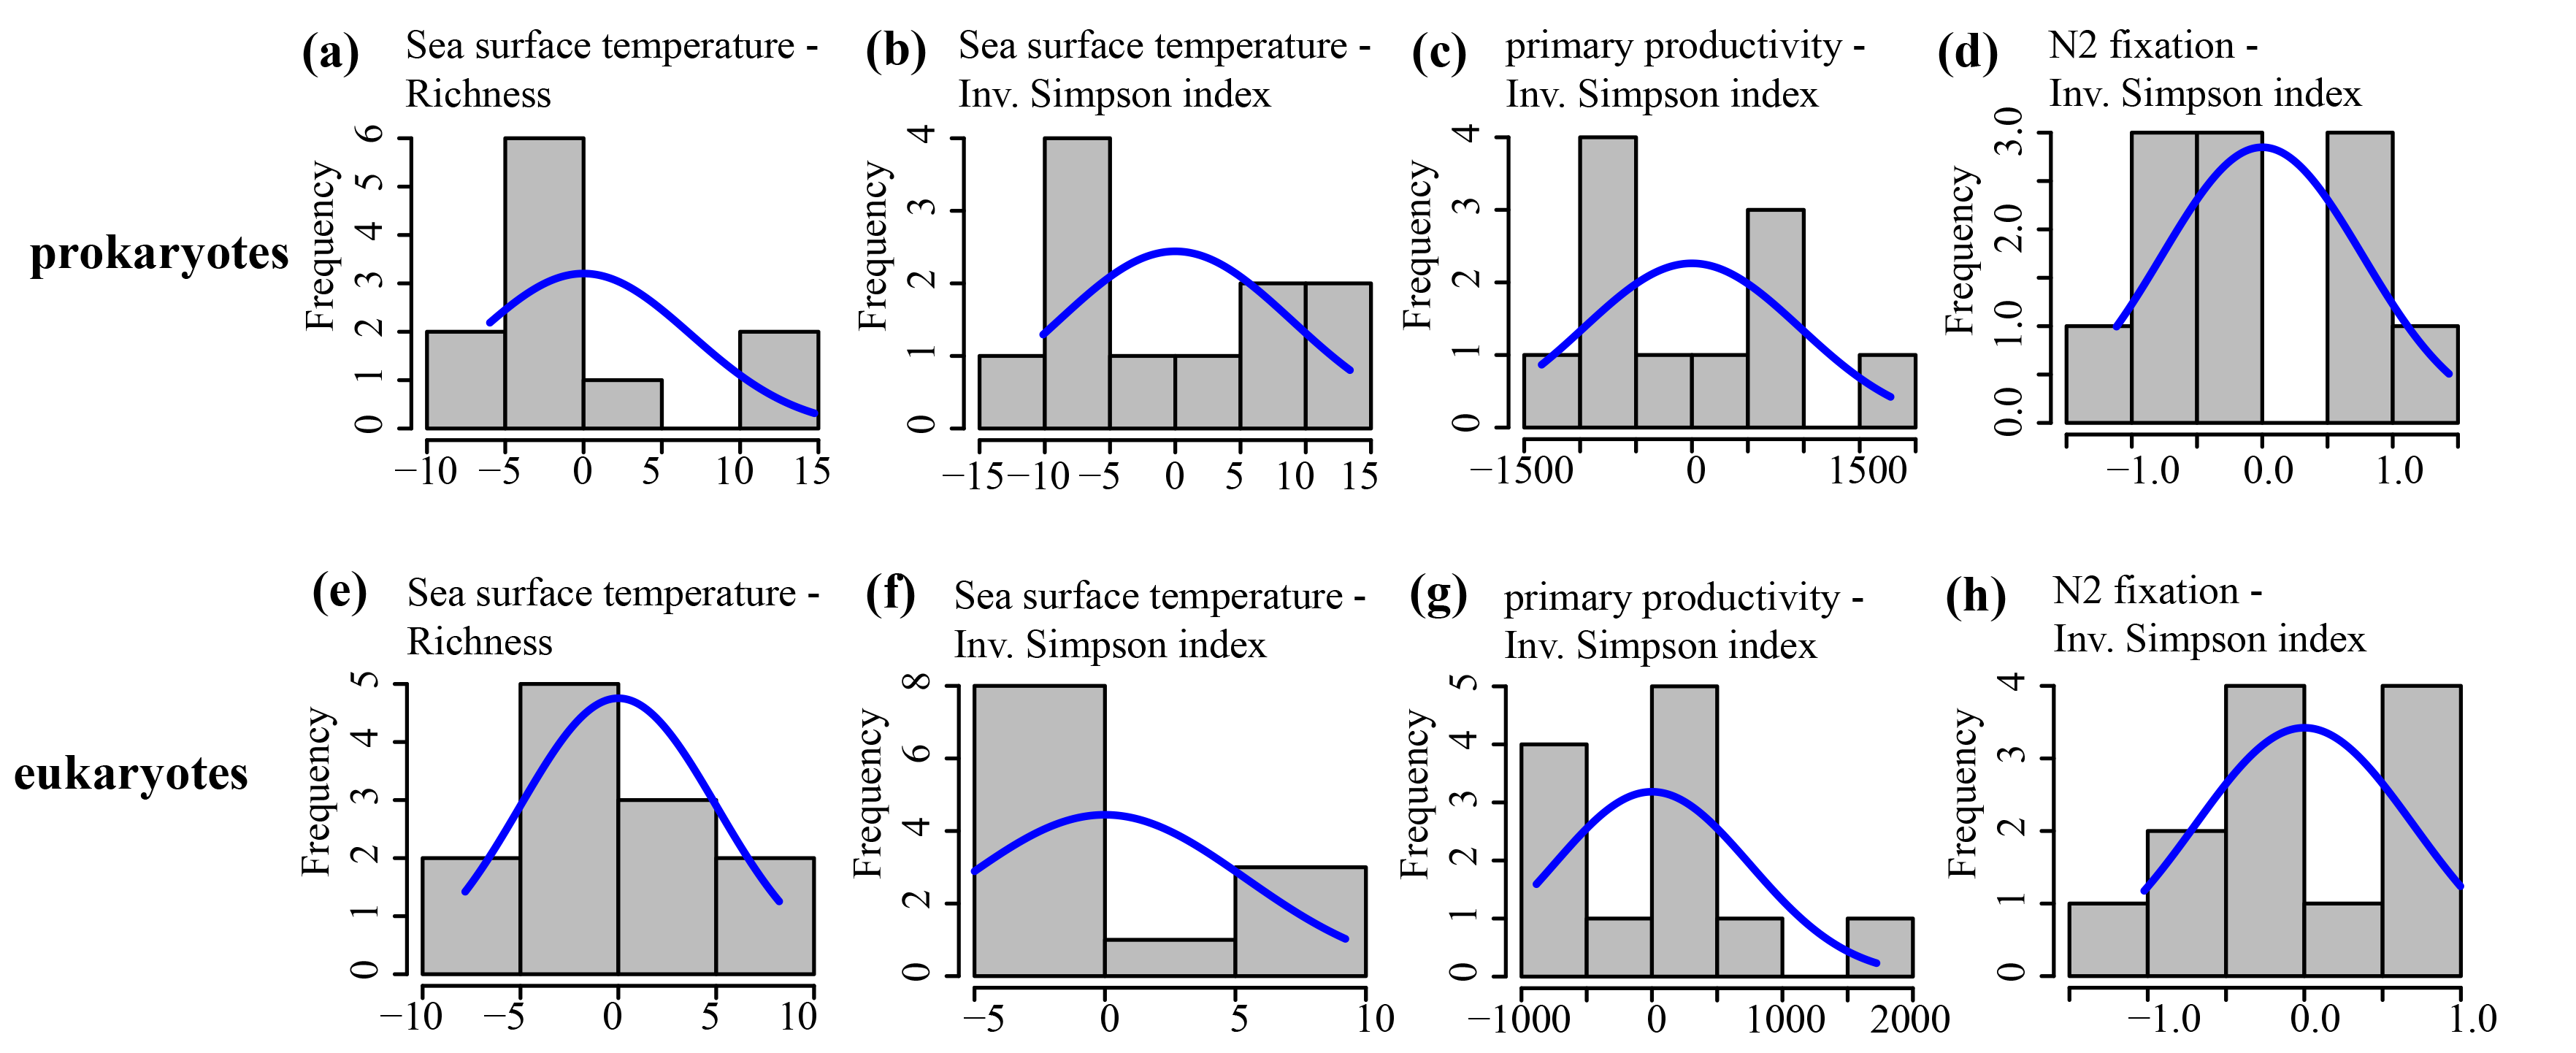

Supplement: Supplementary file 1 [file bg-2021-52-supplement.zip › Supplementary/Figure S8.tif]

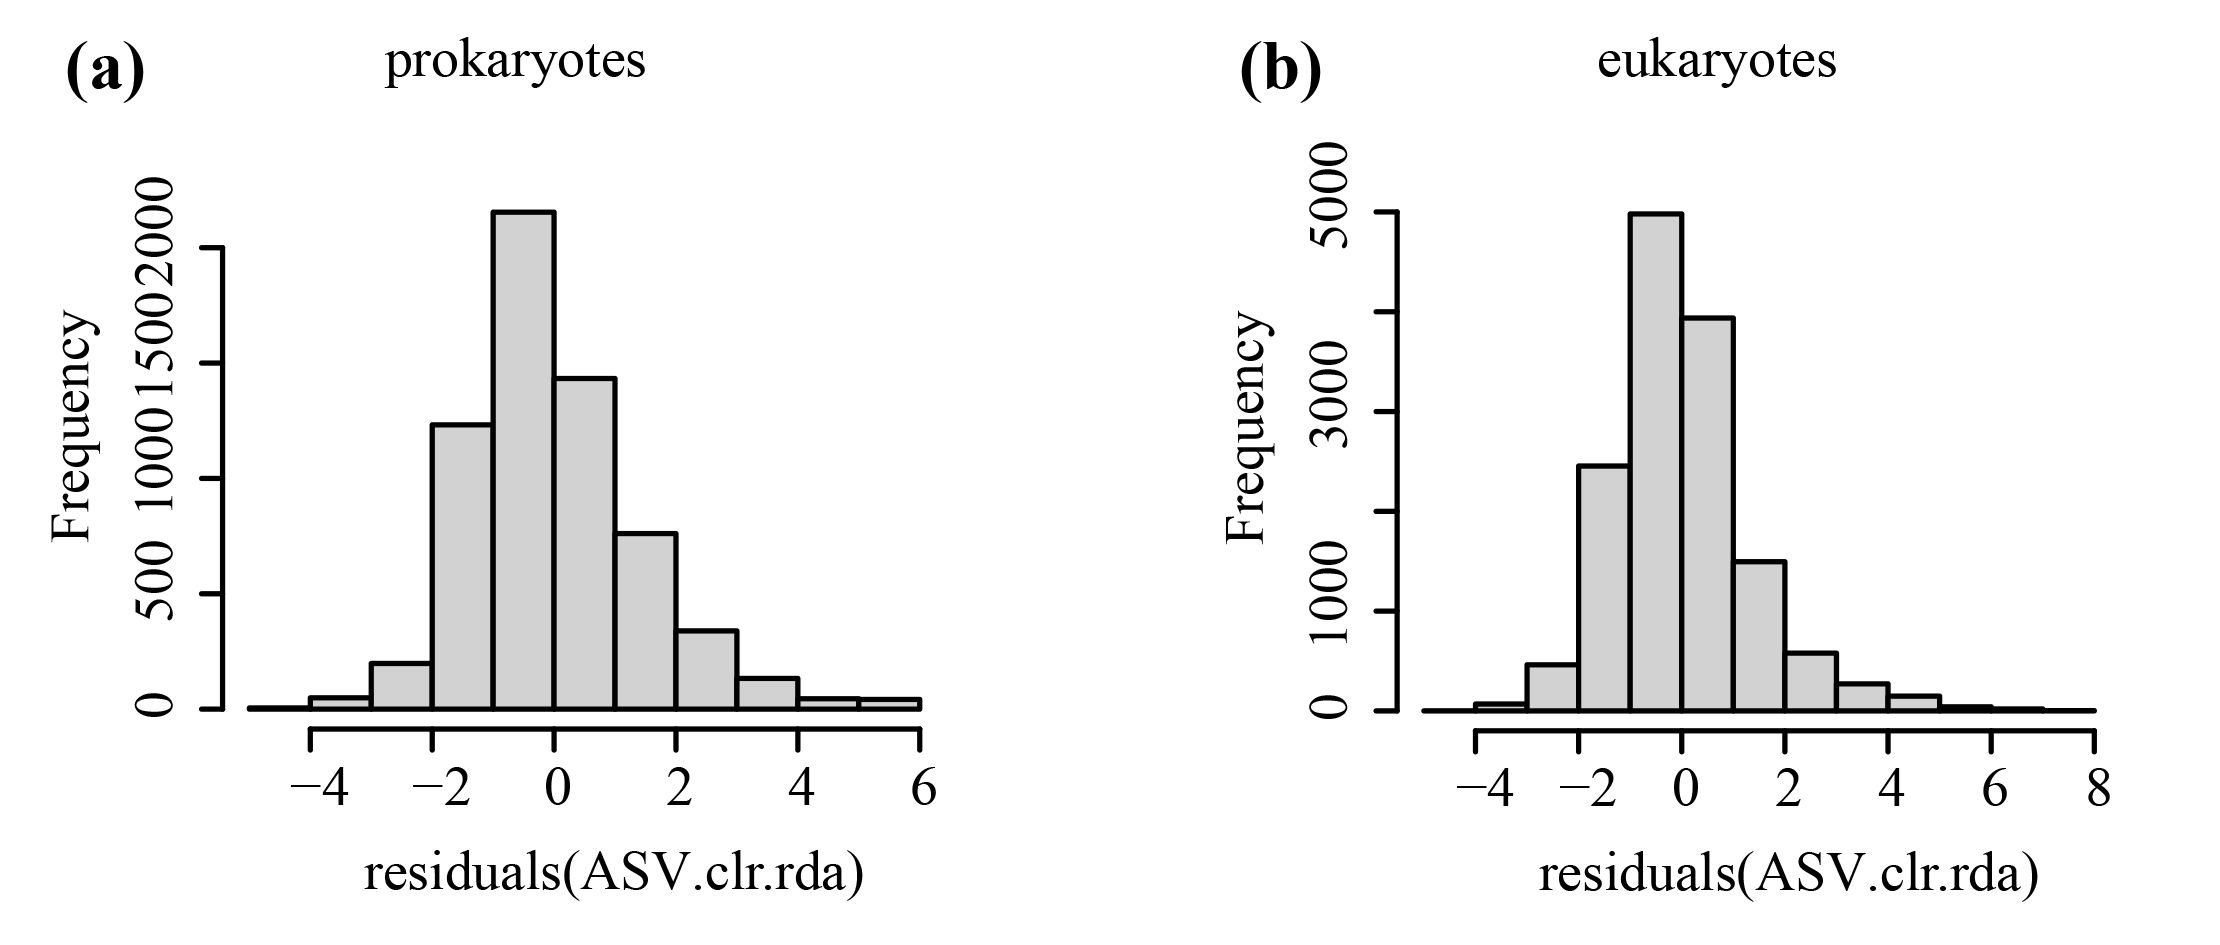

Supplement: Supplementary file 1 [file bg-2021-52-supplement.zip › Supplementary/Figure S9.tif]
